# Supplementary material for: Transcriptional Silencing of ALDH2 Confers a Dependency on Fanconi Anemia Proteins in Acute Myeloid Leukemia
Source: Oxford University Press journal article supplement (doi:10.1158/2159-8290.cd-20-1542), 2021-04-23
Supplement: 21598290cd201542-sup-254337_2_supp_7041614_qr9hxx.xlsx [file 21598290cd201542-sup-254337_2_supp_7041614_qr9hxx.xlsx]

## Sheet: sgRNA targeting E2 and E3 
List of gene and sgRNA in E2 and E3 library
gRNA name	gRNA sequence	U6 promoter	LRG2.0/2.1T	Oligo template
AMFR_1932.214	TGGCTGCTCATCGGCGTGGT	GTGGAAAGGACGAAACACCG	GTTTAAGAGCTATGCTGGAAACAGCATA	GTGGAAAGGACGAAACACCGTGGCTGCTCATCGGCGTGGTGTTTAAGAGCTATGCTGGAAACAGCATA
AMFR_1932.48	CTCTGGGACCTCAACCACGA	GTGGAAAGGACGAAACACCG	GTTTAAGAGCTATGCTGGAAACAGCATA	GTGGAAAGGACGAAACACCGCTCTGGGACCTCAACCACGAGTTTAAGAGCTATGCTGGAAACAGCATA
AMFR_1932.189	CTGCATAAAGATGACCAGGC	GTGGAAAGGACGAAACACCG	GTTTAAGAGCTATGCTGGAAACAGCATA	GTGGAAAGGACGAAACACCGCTGCATAAAGATGACCAGGCGTTTAAGAGCTATGCTGGAAACAGCATA
AMFR_1932.64	GCACAAGAACTATCTACGTG	GTGGAAAGGACGAAACACCG	GTTTAAGAGCTATGCTGGAAACAGCATA	GTGGAAAGGACGAAACACCGGCACAAGAACTATCTACGTGGTTTAAGAGCTATGCTGGAAACAGCATA
AMFR_1932.72	TGACGACTGTGCCATCTGTT	GTGGAAAGGACGAAACACCG	GTTTAAGAGCTATGCTGGAAACAGCATA	GTGGAAAGGACGAAACACCGTGACGACTGTGCCATCTGTTGTTTAAGAGCTATGCTGGAAACAGCATA
AMFR_1932.73	CATCTGTTGGGACTCCATGC	GTGGAAAGGACGAAACACCG	GTTTAAGAGCTATGCTGGAAACAGCATA	GTGGAAAGGACGAAACACCGCATCTGTTGGGACTCCATGCGTTTAAGAGCTATGCTGGAAACAGCATA
AMFR_1932.183	CAGTTTCCGCGCAGCCTGCA	GTGGAAAGGACGAAACACCG	GTTTAAGAGCTATGCTGGAAACAGCATA	GTGGAAAGGACGAAACACCGCAGTTTCCGCGCAGCCTGCAGTTTAAGAGCTATGCTGGAAACAGCATA
AMFR_1932.75	GCTGCGCGGAAACTGCCCTG	GTGGAAAGGACGAAACACCG	GTTTAAGAGCTATGCTGGAAACAGCATA	GTGGAAAGGACGAAACACCGGCTGCGCGGAAACTGCCCTGGTTTAAGAGCTATGCTGGAAACAGCATA
AMFR_1932.179	TTCTAGCCAGGAACGAAGAC	GTGGAAAGGACGAAACACCG	GTTTAAGAGCTATGCTGGAAACAGCATA	GTGGAAAGGACGAAACACCGTTCTAGCCAGGAACGAAGACGTTTAAGAGCTATGCTGGAAACAGCATA
AMFR_1932.178	GGAGGTGTCTTGTTCTAGCC	GTGGAAAGGACGAAACACCG	GTTTAAGAGCTATGCTGGAAACAGCATA	GTGGAAAGGACGAAACACCGGGAGGTGTCTTGTTCTAGCCGTTTAAGAGCTATGCTGGAAACAGCATA
AMFR_1932.93	TCCCCAGGTTCCATACCATC	GTGGAAAGGACGAAACACCG	GTTTAAGAGCTATGCTGGAAACAGCATA	GTGGAAAGGACGAAACACCGTCCCCAGGTTCCATACCATCGTTTAAGAGCTATGCTGGAAACAGCATA
AMFR_1932.130	CATCCTTCGACGCAGGGTCA	GTGGAAAGGACGAAACACCG	GTTTAAGAGCTATGCTGGAAACAGCATA	GTGGAAAGGACGAAACACCGCATCCTTCGACGCAGGGTCAGTTTAAGAGCTATGCTGGAAACAGCATA
ANAPC11_255.2	GATTAAGTGCTGGAACGGCG	GTGGAAAGGACGAAACACCG	GTTTAAGAGCTATGCTGGAAACAGCATA	GTGGAAAGGACGAAACACCGGATTAAGTGCTGGAACGGCGGTTTAAGAGCTATGCTGGAAACAGCATA
ANAPC11_255.3	GCTGGAACGGCGTGGCCACT	GTGGAAAGGACGAAACACCG	GTTTAAGAGCTATGCTGGAAACAGCATA	GTGGAAAGGACGAAACACCGGCTGGAACGGCGTGGCCACTGTTTAAGAGCTATGCTGGAAACAGCATA
ANAPC11_255.4	ACGGCGTGGCCACTTGGCTC	GTGGAAAGGACGAAACACCG	GTTTAAGAGCTATGCTGGAAACAGCATA	GTGGAAAGGACGAAACACCGACGGCGTGGCCACTTGGCTCGTTTAAGAGCTATGCTGGAAACAGCATA
ANAPC11_255.38	GATGCCACAGTTCTCATCGT	GTGGAAAGGACGAAACACCG	GTTTAAGAGCTATGCTGGAAACAGCATA	GTGGAAAGGACGAAACACCGGATGCCACAGTTCTCATCGTGTTTAAGAGCTATGCTGGAAACAGCATA
ANAPC11_255.35	ACCAGCGGGCAGTCGTCGCC	GTGGAAAGGACGAAACACCG	GTTTAAGAGCTATGCTGGAAACAGCATA	GTGGAAAGGACGAAACACCGACCAGCGGGCAGTCGTCGCCGTTTAAGAGCTATGCTGGAAACAGCATA
ANAPC11_255.13	GCCCGGCGACGACTGCCCGC	GTGGAAAGGACGAAACACCG	GTTTAAGAGCTATGCTGGAAACAGCATA	GTGGAAAGGACGAAACACCGGCCCGGCGACGACTGCCCGCGTTTAAGAGCTATGCTGGAAACAGCATA
ANAPC11_255.15	CGACGACTGCCCGCTGGTGT	GTGGAAAGGACGAAACACCG	GTTTAAGAGCTATGCTGGAAACAGCATA	GTGGAAAGGACGAAACACCGCGACGACTGCCCGCTGGTGTGTTTAAGAGCTATGCTGGAAACAGCATA
ANAPC11_255.30	GCAATGCATGTGGAAGCAGT	GTGGAAAGGACGAAACACCG	GTTTAAGAGCTATGCTGGAAACAGCATA	GTGGAAAGGACGAAACACCGGCAATGCATGTGGAAGCAGTGTTTAAGAGCTATGCTGGAAACAGCATA
ANAPC11_255.28	ACTTGAGGATGCAATGCATG	GTGGAAAGGACGAAACACCG	GTTTAAGAGCTATGCTGGAAACAGCATA	GTGGAAAGGACGAAACACCGACTTGAGGATGCAATGCATGGTTTAAGAGCTATGCTGGAAACAGCATA
ANAPC11_255.27	GCTGTGCGTGCAGCCACTTG	GTGGAAAGGACGAAACACCG	GTTTAAGAGCTATGCTGGAAACAGCATA	GTGGAAAGGACGAAACACCGGCTGTGCGTGCAGCCACTTGGTTTAAGAGCTATGCTGGAAACAGCATA
ANAPC11_255.19	GCACTGCCCCATGTGCCGCC	GTGGAAAGGACGAAACACCG	GTTTAAGAGCTATGCTGGAAACAGCATA	GTGGAAAGGACGAAACACCGGCACTGCCCCATGTGCCGCCGTTTAAGAGCTATGCTGGAAACAGCATA
ANKIB1_3270.316	GCGTGCCAAGCGAGGATGAA	GTGGAAAGGACGAAACACCG	GTTTAAGAGCTATGCTGGAAACAGCATA	GTGGAAAGGACGAAACACCGGCGTGCCAAGCGAGGATGAAGTTTAAGAGCTATGCTGGAAACAGCATA
ANKIB1_3270.314	TCTGTGGGGCGTGCCAAGCG	GTGGAAAGGACGAAACACCG	GTTTAAGAGCTATGCTGGAAACAGCATA	GTGGAAAGGACGAAACACCGTCTGTGGGGCGTGCCAAGCGGTTTAAGAGCTATGCTGGAAACAGCATA
ANKIB1_3270.277	GTCCACAGGGCATATCCACA	GTGGAAAGGACGAAACACCG	GTTTAAGAGCTATGCTGGAAACAGCATA	GTGGAAAGGACGAAACACCGGTCCACAGGGCATATCCACAGTTTAAGAGCTATGCTGGAAACAGCATA
ANKIB1_3270.276	TGTCCACAGGGCATATCCAC	GTGGAAAGGACGAAACACCG	GTTTAAGAGCTATGCTGGAAACAGCATA	GTGGAAAGGACGAAACACCGTGTCCACAGGGCATATCCACGTTTAAGAGCTATGCTGGAAACAGCATA
ANKIB1_3270.50	GACCCTGTGGATATGCCCTG	GTGGAAAGGACGAAACACCG	GTTTAAGAGCTATGCTGGAAACAGCATA	GTGGAAAGGACGAAACACCGGACCCTGTGGATATGCCCTGGTTTAAGAGCTATGCTGGAAACAGCATA
ANKIB1_3270.274	TCTACAAAAGTCATGTCCAC	GTGGAAAGGACGAAACACCG	GTTTAAGAGCTATGCTGGAAACAGCATA	GTGGAAAGGACGAAACACCGTCTACAAAAGTCATGTCCACGTTTAAGAGCTATGCTGGAAACAGCATA
ANKIB1_3270.51	TGTGGACATGACTTTTGTAG	GTGGAAAGGACGAAACACCG	GTTTAAGAGCTATGCTGGAAACAGCATA	GTGGAAAGGACGAAACACCGTGTGGACATGACTTTTGTAGGTTTAAGAGCTATGCTGGAAACAGCATA
ANKIB1_3270.60	ATTAAATGGTGTCCTACTCC	GTGGAAAGGACGAAACACCG	GTTTAAGAGCTATGCTGGAAACAGCATA	GTGGAAAGGACGAAACACCGATTAAATGGTGTCCTACTCCGTTTAAGAGCTATGCTGGAAACAGCATA
ANKIB1_3270.61	GCAGTAAGACTAACGAAACA	GTGGAAAGGACGAAACACCG	GTTTAAGAGCTATGCTGGAAACAGCATA	GTGGAAAGGACGAAACACCGGCAGTAAGACTAACGAAACAGTTTAAGAGCTATGCTGGAAACAGCATA
ARIH1_1674.78	TATTTCACTGGCCTTGAATG	GTGGAAAGGACGAAACACCG	GTTTAAGAGCTATGCTGGAAACAGCATA	GTGGAAAGGACGAAACACCGTATTTCACTGGCCTTGAATGGTTTAAGAGCTATGCTGGAAACAGCATA
ARIH1_1674.84	ACTATTTCGTGTCCTGCTCA	GTGGAAAGGACGAAACACCG	GTTTAAGAGCTATGCTGGAAACAGCATA	GTGGAAAGGACGAAACACCGACTATTTCGTGTCCTGCTCAGTTTAAGAGCTATGCTGGAAACAGCATA
ARIH1_1674.84	ACTATTTCGTGTCCTGCTCA	GTGGAAAGGACGAAACACCG	GTTTAAGAGCTATGCTGGAAACAGCATA	GTGGAAAGGACGAAACACCGACTATTTCGTGTCCTGCTCAGTTTAAGAGCTATGCTGGAAACAGCATA
ARIH1_1674.166	TAACAACATGGTGGCAATCT	GTGGAAAGGACGAAACACCG	GTTTAAGAGCTATGCTGGAAACAGCATA	GTGGAAAGGACGAAACACCGTAACAACATGGTGGCAATCTGTTTAAGAGCTATGCTGGAAACAGCATA
ARIH1_1674.162	CAGGTTTAGCATCAGGATAT	GTGGAAAGGACGAAACACCG	GTTTAAGAGCTATGCTGGAAACAGCATA	GTGGAAAGGACGAAACACCGCAGGTTTAGCATCAGGATATGTTTAAGAGCTATGCTGGAAACAGCATA
ARIH1_1674.160	CGCCCACATTTGCAGCGAAC	GTGGAAAGGACGAAACACCG	GTTTAAGAGCTATGCTGGAAACAGCATA	GTGGAAAGGACGAAACACCGCGCCCACATTTGCAGCGAACGTTTAAGAGCTATGCTGGAAACAGCATA
ARIH1_1674.93	ATGACAGTGAAACCTCCAAT	GTGGAAAGGACGAAACACCG	GTTTAAGAGCTATGCTGGAAACAGCATA	GTGGAAAGGACGAAACACCGATGACAGTGAAACCTCCAATGTTTAAGAGCTATGCTGGAAACAGCATA
ARIH1_1674.157	GTTGGCTGCAATCCAATTGG	GTGGAAAGGACGAAACACCG	GTTTAAGAGCTATGCTGGAAACAGCATA	GTGGAAAGGACGAAACACCGGTTGGCTGCAATCCAATTGGGTTTAAGAGCTATGCTGGAAACAGCATA
ARIH1_1674.153	CTCAATTGTGACATGGCATT	GTGGAAAGGACGAAACACCG	GTTTAAGAGCTATGCTGGAAACAGCATA	GTGGAAAGGACGAAACACCGCTCAATTGTGACATGGCATTGTTTAAGAGCTATGCTGGAAACAGCATA
ARIH1_1674.98	GGATGGTGGTTGTAATCACA	GTGGAAAGGACGAAACACCG	GTTTAAGAGCTATGCTGGAAACAGCATA	GTGGAAAGGACGAAACACCGGGATGGTGGTTGTAATCACAGTTTAAGAGCTATGCTGGAAACAGCATA
ARIH1_1674.150	CAGATCCATGTGGTTCCCAT	GTGGAAAGGACGAAACACCG	GTTTAAGAGCTATGCTGGAAACAGCATA	GTGGAAAGGACGAAACACCGCAGATCCATGTGGTTCCCATGTTTAAGAGCTATGCTGGAAACAGCATA
ARIH2_1482.25	GTGTATGCAGTTTGTGCGAA	GTGGAAAGGACGAAACACCG	GTTTAAGAGCTATGCTGGAAACAGCATA	GTGGAAAGGACGAAACACCGGTGTATGCAGTTTGTGCGAAGTTTAAGAGCTATGCTGGAAACAGCATA
ARIH2_1482.26	AAAGGAAAACCTACTCTCTC	GTGGAAAGGACGAAACACCG	GTTTAAGAGCTATGCTGGAAACAGCATA	GTGGAAAGGACGAAACACCGAAAGGAAAACCTACTCTCTCGTTTAAGAGCTATGCTGGAAACAGCATA
ARIH2_1482.141	GCGGCAAAACTGGTGCTGAC	GTGGAAAGGACGAAACACCG	GTTTAAGAGCTATGCTGGAAACAGCATA	GTGGAAAGGACGAAACACCGGCGGCAAAACTGGTGCTGACGTTTAAGAGCTATGCTGGAAACAGCATA
ARIH2_1482.28	CCAGTTTTGCCGCAGCTGCT	GTGGAAAGGACGAAACACCG	GTTTAAGAGCTATGCTGGAAACAGCATA	GTGGAAAGGACGAAACACCGCCAGTTTTGCCGCAGCTGCTGTTTAAGAGCTATGCTGGAAACAGCATA
ARIH2_1482.29	GCACTGCTCAGTTCTCGTCA	GTGGAAAGGACGAAACACCG	GTTTAAGAGCTATGCTGGAAACAGCATA	GTGGAAAGGACGAAACACCGGCACTGCTCAGTTCTCGTCAGTTTAAGAGCTATGCTGGAAACAGCATA
ARIH2_1482.31	AGTTCTCGTCAAGGACGGCG	GTGGAAAGGACGAAACACCG	GTTTAAGAGCTATGCTGGAAACAGCATA	GTGGAAAGGACGAAACACCGAGTTCTCGTCAAGGACGGCGGTTTAAGAGCTATGCTGGAAACAGCATA
ARIH2_1482.41	CTACCTCTTCAGGGACTATG	GTGGAAAGGACGAAACACCG	GTTTAAGAGCTATGCTGGAAACAGCATA	GTGGAAAGGACGAAACACCGCTACCTCTTCAGGGACTATGGTTTAAGAGCTATGCTGGAAACAGCATA
ARIH2_1482.44	CAGACTGCCCCATGGTTATT	GTGGAAAGGACGAAACACCG	GTTTAAGAGCTATGCTGGAAACAGCATA	GTGGAAAGGACGAAACACCGCAGACTGCCCCATGGTTATTGTTTAAGAGCTATGCTGGAAACAGCATA
ARIH2_1482.125	CTCCTGTACCCGAATAACCA	GTGGAAAGGACGAAACACCG	GTTTAAGAGCTATGCTGGAAACAGCATA	GTGGAAAGGACGAAACACCGCTCCTGTACCCGAATAACCAGTTTAAGAGCTATGCTGGAAACAGCATA
ARIH2_1482.124	CACTGTACTCGGCGAGCTCT	GTGGAAAGGACGAAACACCG	GTTTAAGAGCTATGCTGGAAACAGCATA	GTGGAAAGGACGAAACACCGCACTGTACTCGGCGAGCTCTGTTTAAGAGCTATGCTGGAAACAGCATA
ARIH2_1482.47	CTCGCCGAGTACAGTGCAAT	GTGGAAAGGACGAAACACCG	GTTTAAGAGCTATGCTGGAAACAGCATA	GTGGAAAGGACGAAACACCGCTCGCCGAGTACAGTGCAATGTTTAAGAGCTATGCTGGAAACAGCATA
ARIH2_1482.121	CCGGATTGTGGCACAGTCTG	GTGGAAAGGACGAAACACCG	GTTTAAGAGCTATGCTGGAAACAGCATA	GTGGAAAGGACGAAACACCGCCGGATTGTGGCACAGTCTGGTTTAAGAGCTATGCTGGAAACAGCATA
ARIH2_1482.116	CTCAATGCAGATGTTGCACT	GTGGAAAGGACGAAACACCG	GTTTAAGAGCTATGCTGGAAACAGCATA	GTGGAAAGGACGAAACACCGCTCAATGCAGATGTTGCACTGTTTAAGAGCTATGCTGGAAACAGCATA
ARIH2_1482.55	GCTGGATGTGTCTAGGAGAT	GTGGAAAGGACGAAACACCG	GTTTAAGAGCTATGCTGGAAACAGCATA	GTGGAAAGGACGAAACACCGGCTGGATGTGTCTAGGAGATGTTTAAGAGCTATGCTGGAAACAGCATA
BARD1_2277.196	CTTCTCCAGGCGGTCGAGCG	GTGGAAAGGACGAAACACCG	GTTTAAGAGCTATGCTGGAAACAGCATA	GTGGAAAGGACGAAACACCGCTTCTCCAGGCGGTCGAGCGGTTTAAGAGCTATGCTGGAAACAGCATA
BARD1_2277.194	AGCAGCGCAGCAGCTTCTCC	GTGGAAAGGACGAAACACCG	GTTTAAGAGCTATGCTGGAAACAGCATA	GTGGAAAGGACGAAACACCGAGCAGCGCAGCAGCTTCTCCGTTTAAGAGCTATGCTGGAAACAGCATA
BARD1_2277.13	GTAAGTGACTGCATTGGAAC	GTGGAAAGGACGAAACACCG	GTTTAAGAGCTATGCTGGAAACAGCATA	GTGGAAAGGACGAAACACCGGTAAGTGACTGCATTGGAACGTTTAAGAGCTATGCTGGAAACAGCATA
BARD1_2277.193	CAGGCCGGGGTGTAACACAC	GTGGAAAGGACGAAACACCG	GTTTAAGAGCTATGCTGGAAACAGCATA	GTGGAAAGGACGAAACACCGCAGGCCGGGGTGTAACACACGTTTAAGAGCTATGCTGGAAACAGCATA
BARD1_2277.15	CAGTGTGTTACACCCCGGCC	GTGGAAAGGACGAAACACCG	GTTTAAGAGCTATGCTGGAAACAGCATA	GTGGAAAGGACGAAACACCGCAGTGTGTTACACCCCGGCCGTTTAAGAGCTATGCTGGAAACAGCATA
BARD1_2277.192	CAAGTCTTGTATCCAGGCCG	GTGGAAAGGACGAAACACCG	GTTTAAGAGCTATGCTGGAAACAGCATA	GTGGAAAGGACGAAACACCGCAAGTCTTGTATCCAGGCCGGTTTAAGAGCTATGCTGGAAACAGCATA
BARD1_2277.142	CCAGCATGGTCTTTAACATT	GTGGAAAGGACGAAACACCG	GTTTAAGAGCTATGCTGGAAACAGCATA	GTGGAAAGGACGAAACACCGCCAGCATGGTCTTTAACATTGTTTAAGAGCTATGCTGGAAACAGCATA
BARD1_2277.137	TGAGTCATTTTGATACCCGG	GTGGAAAGGACGAAACACCG	GTTTAAGAGCTATGCTGGAAACAGCATA	GTGGAAAGGACGAAACACCGTGAGTCATTTTGATACCCGGGTTTAAGAGCTATGCTGGAAACAGCATA
BARD1_2277.80	TTGGGATTCTCAATGGATGC	GTGGAAAGGACGAAACACCG	GTTTAAGAGCTATGCTGGAAACAGCATA	GTGGAAAGGACGAAACACCGTTGGGATTCTCAATGGATGCGTTTAAGAGCTATGCTGGAAACAGCATA
BARD1_2277.117	CTGCAGTGACGAGCTTAATA	GTGGAAAGGACGAAACACCG	GTTTAAGAGCTATGCTGGAAACAGCATA	GTGGAAAGGACGAAACACCGCTGCAGTGACGAGCTTAATAGTTTAAGAGCTATGCTGGAAACAGCATA
BARD1_2277.110	GATCAGAATCGGGTCTCGCA	GTGGAAAGGACGAAACACCG	GTTTAAGAGCTATGCTGGAAACAGCATA	GTGGAAAGGACGAAACACCGGATCAGAATCGGGTCTCGCAGTTTAAGAGCTATGCTGGAAACAGCATA
BFAR_1353.178	CCAGGATGTCGTAGCAGCAG	GTGGAAAGGACGAAACACCG	GTTTAAGAGCTATGCTGGAAACAGCATA	GTGGAAAGGACGAAACACCGCCAGGATGTCGTAGCAGCAGGTTTAAGAGCTATGCTGGAAACAGCATA
BFAR_1353.177	TCAAGGTGGTGGGGTTAACC	GTGGAAAGGACGAAACACCG	GTTTAAGAGCTATGCTGGAAACAGCATA	GTGGAAAGGACGAAACACCGTCAAGGTGGTGGGGTTAACCGTTTAAGAGCTATGCTGGAAACAGCATA
BFAR_1353.3	AACCCCACCACCTTGAACTG	GTGGAAAGGACGAAACACCG	GTTTAAGAGCTATGCTGGAAACAGCATA	GTGGAAAGGACGAAACACCGAACCCCACCACCTTGAACTGGTTTAAGAGCTATGCTGGAAACAGCATA
BFAR_1353.173	GCTGTGCCCACAGTTCAAGG	GTGGAAAGGACGAAACACCG	GTTTAAGAGCTATGCTGGAAACAGCATA	GTGGAAAGGACGAAACACCGGCTGTGCCCACAGTTCAAGGGTTTAAGAGCTATGCTGGAAACAGCATA
BFAR_1353.5	GCCGTCACTGCCTTGCTTTA	GTGGAAAGGACGAAACACCG	GTTTAAGAGCTATGCTGGAAACAGCATA	GTGGAAAGGACGAAACACCGGCCGTCACTGCCTTGCTTTAGTTTAAGAGCTATGCTGGAAACAGCATA
BFAR_1353.6	GTCACTGCCTTGCTTTATGG	GTGGAAAGGACGAAACACCG	GTTTAAGAGCTATGCTGGAAACAGCATA	GTGGAAAGGACGAAACACCGGTCACTGCCTTGCTTTATGGGTTTAAGAGCTATGCTGGAAACAGCATA
BFAR_1353.23	GGTGTGCTCACAGCTTTAAC	GTGGAAAGGACGAAACACCG	GTTTAAGAGCTATGCTGGAAACAGCATA	GTGGAAAGGACGAAACACCGGGTGTGCTCACAGCTTTAACGTTTAAGAGCTATGCTGGAAACAGCATA
BFAR_1353.151	AACTTCTTCCGCCGTCCATT	GTGGAAAGGACGAAACACCG	GTTTAAGAGCTATGCTGGAAACAGCATA	GTGGAAAGGACGAAACACCGAACTTCTTCCGCCGTCCATTGTTTAAGAGCTATGCTGGAAACAGCATA
BFAR_1353.147	TTCTATGGTATAGGGCGTCT	GTGGAAAGGACGAAACACCG	GTTTAAGAGCTATGCTGGAAACAGCATA	GTGGAAAGGACGAAACACCGTTCTATGGTATAGGGCGTCTGTTTAAGAGCTATGCTGGAAACAGCATA
BFAR_1353.67	TTGCTGAGTTTGCTTGGGAC	GTGGAAAGGACGAAACACCG	GTTTAAGAGCTATGCTGGAAACAGCATA	GTGGAAAGGACGAAACACCGTTGCTGAGTTTGCTTGGGACGTTTAAGAGCTATGCTGGAAACAGCATA
BIRC2_1857.4	CATATTCAACTTTCCCCGCC	GTGGAAAGGACGAAACACCG	GTTTAAGAGCTATGCTGGAAACAGCATA	GTGGAAAGGACGAAACACCGCATATTCAACTTTCCCCGCCGTTTAAGAGCTATGCTGGAAACAGCATA
BIRC2_1857.125	AAGCAGGCTACCCTATCTCC	GTGGAAAGGACGAAACACCG	GTTTAAGAGCTATGCTGGAAACAGCATA	GTGGAAAGGACGAAACACCGAAGCAGGCTACCCTATCTCCGTTTAAGAGCTATGCTGGAAACAGCATA
BIRC2_1857.32	GCTCAGTAACTGGGAACCAA	GTGGAAAGGACGAAACACCG	GTTTAAGAGCTATGCTGGAAACAGCATA	GTGGAAAGGACGAAACACCGGCTCAGTAACTGGGAACCAAGTTTAAGAGCTATGCTGGAAACAGCATA
BIRC2_1857.116	GCAAGCTGCTCAGGCTGAAC	GTGGAAAGGACGAAACACCG	GTTTAAGAGCTATGCTGGAAACAGCATA	GTGGAAAGGACGAAACACCGGCAAGCTGCTCAGGCTGAACGTTTAAGAGCTATGCTGGAAACAGCATA
BIRC2_1857.104	TCCAAGGCAGATTTAACCAC	GTGGAAAGGACGAAACACCG	GTTTAAGAGCTATGCTGGAAACAGCATA	GTGGAAAGGACGAAACACCGTCCAAGGCAGATTTAACCACGTTTAAGAGCTATGCTGGAAACAGCATA
BIRC2_1857.78	ACGAACTTGTAAAGTGTGTA	GTGGAAAGGACGAAACACCG	GTTTAAGAGCTATGCTGGAAACAGCATA	GTGGAAAGGACGAAACACCGACGAACTTGTAAAGTGTGTAGTTTAAGAGCTATGCTGGAAACAGCATA
BIRC2_1857.81	TGGTCATCTGGTAGTATGCC	GTGGAAAGGACGAAACACCG	GTTTAAGAGCTATGCTGGAAACAGCATA	GTGGAAAGGACGAAACACCGTGGTCATCTGGTAGTATGCCGTTTAAGAGCTATGCTGGAAACAGCATA
BIRC2_1857.92	TTAGAGAAGGGGCACATTCC	GTGGAAAGGACGAAACACCG	GTTTAAGAGCTATGCTGGAAACAGCATA	GTGGAAAGGACGAAACACCGTTAGAGAAGGGGCACATTCCGTTTAAGAGCTATGCTGGAAACAGCATA
BIRC2_1857.82	TAAGAAAATGCCCTATTTGC	GTGGAAAGGACGAAACACCG	GTTTAAGAGCTATGCTGGAAACAGCATA	GTGGAAAGGACGAAACACCGTAAGAAAATGCCCTATTTGCGTTTAAGAGCTATGCTGGAAACAGCATA
BIRC2_1857.87	TTGATTATACCCCTGCAAAT	GTGGAAAGGACGAAACACCG	GTTTAAGAGCTATGCTGGAAACAGCATA	GTGGAAAGGACGAAACACCGTTGATTATACCCCTGCAAATGTTTAAGAGCTATGCTGGAAACAGCATA
BIRC3_1815.0	ACGTATTCCACTTTTCCTGC	GTGGAAAGGACGAAACACCG	GTTTAAGAGCTATGCTGGAAACAGCATA	GTGGAAAGGACGAAACACCGACGTATTCCACTTTTCCTGCGTTTAAGAGCTATGCTGGAAACAGCATA
BIRC3_1815.17	TTTTCTGTCGCCAACAGATC	GTGGAAAGGACGAAACACCG	GTTTAAGAGCTATGCTGGAAACAGCATA	GTGGAAAGGACGAAACACCGTTTTCTGTCGCCAACAGATCGTTTAAGAGCTATGCTGGAAACAGCATA
BIRC3_1815.98	AGGATTAACTAGAACACTAG	GTGGAAAGGACGAAACACCG	GTTTAAGAGCTATGCTGGAAACAGCATA	GTGGAAAGGACGAAACACCGAGGATTAACTAGAACACTAGGTTTAAGAGCTATGCTGGAAACAGCATA
BIRC3_1815.78	GTTAGTAGACTATCCAGGAT	GTGGAAAGGACGAAACACCG	GTTTAAGAGCTATGCTGGAAACAGCATA	GTGGAAAGGACGAAACACCGGTTAGTAGACTATCCAGGATGTTTAAGAGCTATGCTGGAAACAGCATA
BIRC3_1815.63	AAGAACATGTAAAGTGTGTA	GTGGAAAGGACGAAACACCG	GTTTAAGAGCTATGCTGGAAACAGCATA	GTGGAAAGGACGAAACACCGAAGAACATGTAAAGTGTGTAGTTTAAGAGCTATGCTGGAAACAGCATA
BIRC3_1815.64	TCCATAGTGTTTATTCCTTG	GTGGAAAGGACGAAACACCG	GTTTAAGAGCTATGCTGGAAACAGCATA	GTGGAAAGGACGAAACACCGTCCATAGTGTTTATTCCTTGGTTTAAGAGCTATGCTGGAAACAGCATA
BIRC3_1815.68	TTGATTGTACTCCTACAAAT	GTGGAAAGGACGAAACACCG	GTTTAAGAGCTATGCTGGAAACAGCATA	GTGGAAAGGACGAAACACCGTTGATTGTACTCCTACAAATGTTTAAGAGCTATGCTGGAAACAGCATA
BIRC3_1815.66	TATTTGTAGGAGTACAATCA	GTGGAAAGGACGAAACACCG	GTTTAAGAGCTATGCTGGAAACAGCATA	GTGGAAAGGACGAAACACCGTATTTGTAGGAGTACAATCAGTTTAAGAGCTATGCTGGAAACAGCATA
BIRC7_897.172	AGTCAGCGGCCAGTCATAGA	GTGGAAAGGACGAAACACCG	GTTTAAGAGCTATGCTGGAAACAGCATA	GTGGAAAGGACGAAACACCGAGTCAGCGGCCAGTCATAGAGTTTAAGAGCTATGCTGGAAACAGCATA
BIRC7_897.46	TGAGGTGCTTCTTCTGCTAT	GTGGAAAGGACGAAACACCG	GTTTAAGAGCTATGCTGGAAACAGCATA	GTGGAAAGGACGAAACACCGTGAGGTGCTTCTTCTGCTATGTTTAAGAGCTATGCTGGAAACAGCATA
BIRC7_897.162	CACTTGGCATGCTCCGTCCA	GTGGAAAGGACGAAACACCG	GTTTAAGAGCTATGCTGGAAACAGCATA	GTGGAAAGGACGAAACACCGCACTTGGCATGCTCCGTCCAGTTTAAGAGCTATGCTGGAAACAGCATA
BIRC7_897.93	GAGGACGTGCAAGGTGTGCC	GTGGAAAGGACGAAACACCG	GTTTAAGAGCTATGCTGGAAACAGCATA	GTGGAAAGGACGAAACACCGGAGGACGTGCAAGGTGTGCCGTTTAAGAGCTATGCTGGAAACAGCATA
BIRC7_897.116	CAAAGACGATGGACACGGCG	GTGGAAAGGACGAAACACCG	GTTTAAGAGCTATGCTGGAAACAGCATA	GTGGAAAGGACGAAACACCGCAAAGACGATGGACACGGCGGTTTAAGAGCTATGCTGGAAACAGCATA
BIRC7_897.94	TCCATCGTCTTTGTGCCGTG	GTGGAAAGGACGAAACACCG	GTTTAAGAGCTATGCTGGAAACAGCATA	GTGGAAAGGACGAAACACCGTCCATCGTCTTTGTGCCGTGGTTTAAGAGCTATGCTGGAAACAGCATA
BIRC7_897.95	CTTTGTGCCGTGCGGCCACC	GTGGAAAGGACGAAACACCG	GTTTAAGAGCTATGCTGGAAACAGCATA	GTGGAAAGGACGAAACACCGCTTTGTGCCGTGCGGCCACCGTTTAAGAGCTATGCTGGAAACAGCATA
BIRC7_897.96	GTCTGTGCTGAGTGTGCCCC	GTGGAAAGGACGAAACACCG	GTTTAAGAGCTATGCTGGAAACAGCATA	GTGGAAAGGACGAAACACCGGTCTGTGCTGAGTGTGCCCCGTTTAAGAGCTATGCTGGAAACAGCATA
BIRC7_897.104	CGGACGGGGGCTCTGCAGAT	GTGGAAAGGACGAAACACCG	GTTTAAGAGCTATGCTGGAAACAGCATA	GTGGAAAGGACGAAACACCGCGGACGGGGGCTCTGCAGATGTTTAAGAGCTATGCTGGAAACAGCATA
BIRC8_711.31	GAAGCTTTGTAAAATCTGCA	GTGGAAAGGACGAAACACCG	GTTTAAGAGCTATGCTGGAAACAGCATA	GTGGAAAGGACGAAACACCGGAAGCTTTGTAAAATCTGCAGTTTAAGAGCTATGCTGGAAACAGCATA
BIRC8_711.0	GAAGCCCGGCTCATTACTTT	GTGGAAAGGACGAAACACCG	GTTTAAGAGCTATGCTGGAAACAGCATA	GTGGAAAGGACGAAACACCGGAAGCCCGGCTCATTACTTTGTTTAAGAGCTATGCTGGAAACAGCATA
BIRC8_711.10	GTGGAGGAGGGCTAGCCAAC	GTGGAAAGGACGAAACACCG	GTTTAAGAGCTATGCTGGAAACAGCATA	GTGGAAAGGACGAAACACCGGTGGAGGAGGGCTAGCCAACGTTTAAGAGCTATGCTGGAAACAGCATA
BIRC8_711.49	TCTAGCAGATATTTGCAACC	GTGGAAAGGACGAAACACCG	GTTTAAGAGCTATGCTGGAAACAGCATA	GTGGAAAGGACGAAACACCGTCTAGCAGATATTTGCAACCGTTTAAGAGCTATGCTGGAAACAGCATA
BIRC8_711.42	GCTTCTTGTAGCATAGGATT	GTGGAAAGGACGAAACACCG	GTTTAAGAGCTATGCTGGAAACAGCATA	GTGGAAAGGACGAAACACCGGCTTCTTGTAGCATAGGATTGTTTAAGAGCTATGCTGGAAACAGCATA
BIRC8_711.28	GAGCAACTATAAAACGCTTG	GTGGAAAGGACGAAACACCG	GTTTAAGAGCTATGCTGGAAACAGCATA	GTGGAAAGGACGAAACACCGGAGCAACTATAAAACGCTTGGTTTAAGAGCTATGCTGGAAACAGCATA
BIRC8_711.34	CAGATGTCCCATGTGCAGCG	GTGGAAAGGACGAAACACCG	GTTTAAGAGCTATGCTGGAAACAGCATA	GTGGAAAGGACGAAACACCGCAGATGTCCCATGTGCAGCGGTTTAAGAGCTATGCTGGAAACAGCATA
BIRC8_711.36	TCAATAACCGCGCTGCACAT	GTGGAAAGGACGAAACACCG	GTTTAAGAGCTATGCTGGAAACAGCATA	GTGGAAAGGACGAAACACCGTCAATAACCGCGCTGCACATGTTTAAGAGCTATGCTGGAAACAGCATA
BIRC8_711.35	ATCAATAACCGCGCTGCACA	GTGGAAAGGACGAAACACCG	GTTTAAGAGCTATGCTGGAAACAGCATA	GTGGAAAGGACGAAACACCGATCAATAACCGCGCTGCACAGTTTAAGAGCTATGCTGGAAACAGCATA
BMI1_981.0	CACCTGATGTGTGTGCTTTG	GTGGAAAGGACGAAACACCG	GTTTAAGAGCTATGCTGGAAACAGCATA	GTGGAAAGGACGAAACACCGCACCTGATGTGTGTGCTTTGGTTTAAGAGCTATGCTGGAAACAGCATA
BMI1_981.87	TAGACATTCTATTATGGTTG	GTGGAAAGGACGAAACACCG	GTTTAAGAGCTATGCTGGAAACAGCATA	GTGGAAAGGACGAAACACCGTAGACATTCTATTATGGTTGGTTTAAGAGCTATGCTGGAAACAGCATA
BMI1_981.3	AACGTGTATTGTTCGTTACC	GTGGAAAGGACGAAACACCG	GTTTAAGAGCTATGCTGGAAACAGCATA	GTGGAAAGGACGAAACACCGAACGTGTATTGTTCGTTACCGTTTAAGAGCTATGCTGGAAACAGCATA
BMI1_981.84	GACAATACTTGCTGGTCTCC	GTGGAAAGGACGAAACACCG	GTTTAAGAGCTATGCTGGAAACAGCATA	GTGGAAAGGACGAAACACCGGACAATACTTGCTGGTCTCCGTTTAAGAGCTATGCTGGAAACAGCATA
BMI1_981.83	ACAAATAGGACAATACTTGC	GTGGAAAGGACGAAACACCG	GTTTAAGAGCTATGCTGGAAACAGCATA	GTGGAAAGGACGAAACACCGACAAATAGGACAATACTTGCGTTTAAGAGCTATGCTGGAAACAGCATA
BMI1_981.71	TGCATCACAGTCATTGCTGC	GTGGAAAGGACGAAACACCG	GTTTAAGAGCTATGCTGGAAACAGCATA	GTGGAAAGGACGAAACACCGTGCATCACAGTCATTGCTGCGTTTAAGAGCTATGCTGGAAACAGCATA
BMI1_981.22	ATATTGCCTACATTTATACC	GTGGAAAGGACGAAACACCG	GTTTAAGAGCTATGCTGGAAACAGCATA	GTGGAAAGGACGAAACACCGATATTGCCTACATTTATACCGTTTAAGAGCTATGCTGGAAACAGCATA
BRAP_1779.151	TCATGACTGGTCATTGCAGC	GTGGAAAGGACGAAACACCG	GTTTAAGAGCTATGCTGGAAACAGCATA	GTGGAAAGGACGAAACACCGTCATGACTGGTCATTGCAGCGTTTAAGAGCTATGCTGGAAACAGCATA
BRAP_1779.134	CCAGACACACCGTGCACTTG	GTGGAAAGGACGAAACACCG	GTTTAAGAGCTATGCTGGAAACAGCATA	GTGGAAAGGACGAAACACCGCCAGACACACCGTGCACTTGGTTTAAGAGCTATGCTGGAAACAGCATA
BRAP_1779.26	CCCCAAGTGCACGGTGTGTC	GTGGAAAGGACGAAACACCG	GTTTAAGAGCTATGCTGGAAACAGCATA	GTGGAAAGGACGAAACACCGCCCCAAGTGCACGGTGTGTCGTTTAAGAGCTATGCTGGAAACAGCATA
BRAP_1779.131	TGTGGTTACATAACGTTGTG	GTGGAAAGGACGAAACACCG	GTTTAAGAGCTATGCTGGAAACAGCATA	GTGGAAAGGACGAAACACCGTGTGGTTACATAACGTTGTGGTTTAAGAGCTATGCTGGAAACAGCATA
BRAP_1779.128	CGTCCCAGCGCTGTAGACAC	GTGGAAAGGACGAAACACCG	GTTTAAGAGCTATGCTGGAAACAGCATA	GTGGAAAGGACGAAACACCGCGTCCCAGCGCTGTAGACACGTTTAAGAGCTATGCTGGAAACAGCATA
BRAP_1779.126	GTTTGACAGTACCGGCAAAC	GTGGAAAGGACGAAACACCG	GTTTAAGAGCTATGCTGGAAACAGCATA	GTGGAAAGGACGAAACACCGGTTTGACAGTACCGGCAAACGTTTAAGAGCTATGCTGGAAACAGCATA
BRAP_1779.37	ATATGCGGCCACATAGGATG	GTGGAAAGGACGAAACACCG	GTTTAAGAGCTATGCTGGAAACAGCATA	GTGGAAAGGACGAAACACCGATATGCGGCCACATAGGATGGTTTAAGAGCTATGCTGGAAACAGCATA
BRAP_1779.120	TCGATGGTTGGTAAGCTGCA	GTGGAAAGGACGAAACACCG	GTTTAAGAGCTATGCTGGAAACAGCATA	GTGGAAAGGACGAAACACCGTCGATGGTTGGTAAGCTGCAGTTTAAGAGCTATGCTGGAAACAGCATA
BRAP_1779.52	GGAATCTCAGCGAATCTACT	GTGGAAAGGACGAAACACCG	GTTTAAGAGCTATGCTGGAAACAGCATA	GTGGAAAGGACGAAACACCGGGAATCTCAGCGAATCTACTGTTTAAGAGCTATGCTGGAAACAGCATA
BRAP_1779.111	CTGCTCCTCTTTGAGCTCGT	GTGGAAAGGACGAAACACCG	GTTTAAGAGCTATGCTGGAAACAGCATA	GTGGAAAGGACGAAACACCGCTGCTCCTCTTTGAGCTCGTGTTTAAGAGCTATGCTGGAAACAGCATA
CBL_2721.92	GATGTAAAGATTGAGCCCTG	GTGGAAAGGACGAAACACCG	GTTTAAGAGCTATGCTGGAAACAGCATA	GTGGAAAGGACGAAACACCGGATGTAAAGATTGAGCCCTGGTTTAAGAGCTATGCTGGAAACAGCATA
CBL_2721.403	TCCACCGTCCCCGGCGGGTG	GTGGAAAGGACGAAACACCG	GTTTAAGAGCTATGCTGGAAACAGCATA	GTGGAAAGGACGAAACACCGTCCACCGTCCCCGGCGGGTGGTTTAAGAGCTATGCTGGAAACAGCATA
CBL_2721.391	CGGAGATGCTGGTAGGTATC	GTGGAAAGGACGAAACACCG	GTTTAAGAGCTATGCTGGAAACAGCATA	GTGGAAAGGACGAAACACCGCGGAGATGCTGGTAGGTATCGTTTAAGAGCTATGCTGGAAACAGCATA
CBL_2721.59	CCCTTGGAAGAGCTTTCGAC	GTGGAAAGGACGAAACACCG	GTTTAAGAGCTATGCTGGAAACAGCATA	GTGGAAAGGACGAAACACCGCCCTTGGAAGAGCTTTCGACGTTTAAGAGCTATGCTGGAAACAGCATA
CBL_2721.351	GGGTCACTTTGATATGGTCT	GTGGAAAGGACGAAACACCG	GTTTAAGAGCTATGCTGGAAACAGCATA	GTGGAAAGGACGAAACACCGGGGTCACTTTGATATGGTCTGTTTAAGAGCTATGCTGGAAACAGCATA
CBL_2721.345	GTGCACATGAGGTGTCCACA	GTGGAAAGGACGAAACACCG	GTTTAAGAGCTATGCTGGAAACAGCATA	GTGGAAAGGACGAAACACCGGTGCACATGAGGTGTCCACAGTTTAAGAGCTATGCTGGAAACAGCATA
CBL_2721.344	TGTGCACATGAGGTGTCCAC	GTGGAAAGGACGAAACACCG	GTTTAAGAGCTATGCTGGAAACAGCATA	GTGGAAAGGACGAAACACCGTGTGCACATGAGGTGTCCACGTTTAAGAGCTATGCTGGAAACAGCATA
CBL_2721.343	TAAGACAGGATGTGCACATG	GTGGAAAGGACGAAACACCG	GTTTAAGAGCTATGCTGGAAACAGCATA	GTGGAAAGGACGAAACACCGTAAGACAGGATGTGCACATGGTTTAAGAGCTATGCTGGAAACAGCATA
CBL_2721.93	GCACATCCTGTCTTACATCC	GTGGAAAGGACGAAACACCG	GTTTAAGAGCTATGCTGGAAACAGCATA	GTGGAAAGGACGAAACACCGGCACATCCTGTCTTACATCCGTTTAAGAGCTATGCTGGAAACAGCATA
CBL_2721.340	TTAATTTCACATCGGCAGAA	GTGGAAAGGACGAAACACCG	GTTTAAGAGCTATGCTGGAAACAGCATA	GTGGAAAGGACGAAACACCGTTAATTTCACATCGGCAGAAGTTTAAGAGCTATGCTGGAAACAGCATA
CBL_2721.98	TTCTGCCGATGTGAAATTAA	GTGGAAAGGACGAAACACCG	GTTTAAGAGCTATGCTGGAAACAGCATA	GTGGAAAGGACGAAACACCGTTCTGCCGATGTGAAATTAAGTTTAAGAGCTATGCTGGAAACAGCATA
CBL_2721.248	CACACTCTGGACCTACTAAT	GTGGAAAGGACGAAACACCG	GTTTAAGAGCTATGCTGGAAACAGCATA	GTGGAAAGGACGAAACACCGCACACTCTGGACCTACTAATGTTTAAGAGCTATGCTGGAAACAGCATA
CBL_2721.224	ACGTACAGCTATCAATCTGC	GTGGAAAGGACGAAACACCG	GTTTAAGAGCTATGCTGGAAACAGCATA	GTGGAAAGGACGAAACACCGACGTACAGCTATCAATCTGCGTTTAAGAGCTATGCTGGAAACAGCATA
CBL_2721.153	GCCACCTGTGCCGGCCGTGC	GTGGAAAGGACGAAACACCG	GTTTAAGAGCTATGCTGGAAACAGCATA	GTGGAAAGGACGAAACACCGGCCACCTGTGCCGGCCGTGCGTTTAAGAGCTATGCTGGAAACAGCATA
CBL_2721.183	CATGAGGTTCTCGATCTCAC	GTGGAAAGGACGAAACACCG	GTTTAAGAGCTATGCTGGAAACAGCATA	GTGGAAAGGACGAAACACCGCATGAGGTTCTCGATCTCACGTTTAAGAGCTATGCTGGAAACAGCATA
CBLB_2949.10	TGCCGCAGATCGCAGGACCG	GTGGAAAGGACGAAACACCG	GTTTAAGAGCTATGCTGGAAACAGCATA	GTGGAAAGGACGAAACACCGTGCCGCAGATCGCAGGACCGGTTTAAGAGCTATGCTGGAAACAGCATA
CBLB_2949.21	CTTTCCCAATGGTCAATTCC	GTGGAAAGGACGAAACACCG	GTTTAAGAGCTATGCTGGAAACAGCATA	GTGGAAAGGACGAAACACCGCTTTCCCAATGGTCAATTCCGTTTAAGAGCTATGCTGGAAACAGCATA
CBLB_2949.356	TAATCTGGTGGACCTCATGA	GTGGAAAGGACGAAACACCG	GTTTAAGAGCTATGCTGGAAACAGCATA	GTGGAAAGGACGAAACACCGTAATCTGGTGGACCTCATGAGTTTAAGAGCTATGCTGGAAACAGCATA
CBLB_2949.35	GGGGCTCTATTTTGCGGAAT	GTGGAAAGGACGAAACACCG	GTTTAAGAGCTATGCTGGAAACAGCATA	GTGGAAAGGACGAAACACCGGGGGCTCTATTTTGCGGAATGTTTAAGAGCTATGCTGGAAACAGCATA
CBLB_2949.346	CCAATCGAGTGCAACTTAAC	GTGGAAAGGACGAAACACCG	GTTTAAGAGCTATGCTGGAAACAGCATA	GTGGAAAGGACGAAACACCGCCAATCGAGTGCAACTTAACGTTTAAGAGCTATGCTGGAAACAGCATA
CBLB_2949.45	TGGGCCATTGGCTATGTGAC	GTGGAAAGGACGAAACACCG	GTTTAAGAGCTATGCTGGAAACAGCATA	GTGGAAAGGACGAAACACCGTGGGCCATTGGCTATGTGACGTTTAAGAGCTATGCTGGAAACAGCATA
CBLB_2949.61	GATGTCAAGATTGAGCCTTG	GTGGAAAGGACGAAACACCG	GTTTAAGAGCTATGCTGGAAACAGCATA	GTGGAAAGGACGAAACACCGGATGTCAAGATTGAGCCTTGGTTTAAGAGCTATGCTGGAAACAGCATA
CBLB_2949.331	CTGCCATGCCGTAAGGCAAG	GTGGAAAGGACGAAACACCG	GTTTAAGAGCTATGCTGGAAACAGCATA	GTGGAAAGGACGAAACACCGCTGCCATGCCGTAAGGCAAGGTTTAAGAGCTATGCTGGAAACAGCATA
CBLB_2949.64	GCACCTCTTGCCTTACGGCA	GTGGAAAGGACGAAACACCG	GTTTAAGAGCTATGCTGGAAACAGCATA	GTGGAAAGGACGAAACACCGGCACCTCTTGCCTTACGGCAGTTTAAGAGCTATGCTGGAAACAGCATA
CBLB_2949.328	TTTATTTCACAACGACAGAA	GTGGAAAGGACGAAACACCG	GTTTAAGAGCTATGCTGGAAACAGCATA	GTGGAAAGGACGAAACACCGTTTATTTCACAACGACAGAAGTTTAAGAGCTATGCTGGAAACAGCATA
CBLB_2949.276	GGAGGTCTTTCAGGTGGCGG	GTGGAAAGGACGAAACACCG	GTTTAAGAGCTATGCTGGAAACAGCATA	GTGGAAAGGACGAAACACCGGGAGGTCTTTCAGGTGGCGGGTTTAAGAGCTATGCTGGAAACAGCATA
CBLB_2949.171	CCTGCGCGGTCGTGGTTTAG	GTGGAAAGGACGAAACACCG	GTTTAAGAGCTATGCTGGAAACAGCATA	GTGGAAAGGACGAAACACCGCCTGCGCGGTCGTGGTTTAGGTTTAAGAGCTATGCTGGAAACAGCATA
CBLB_2949.157	GGGCAACTTCGACATTATTC	GTGGAAAGGACGAAACACCG	GTTTAAGAGCTATGCTGGAAACAGCATA	GTGGAAAGGACGAAACACCGGGGCAACTTCGACATTATTCGTTTAAGAGCTATGCTGGAAACAGCATA
CBLC_1425.103	GATCTGTGCTGAGAGCAACA	GTGGAAAGGACGAAACACCG	GTTTAAGAGCTATGCTGGAAACAGCATA	GTGGAAAGGACGAAACACCGGATCTGTGCTGAGAGCAACAGTTTAAGAGCTATGCTGGAAACAGCATA
CBLC_1425.174	AGCGGCAGAAGGGGCAGGTC	GTGGAAAGGACGAAACACCG	GTTTAAGAGCTATGCTGGAAACAGCATA	GTGGAAAGGACGAAACACCGAGCGGCAGAAGGGGCAGGTCGTTTAAGAGCTATGCTGGAAACAGCATA
CBLC_1425.12	AAGAGCAATGCGTCGACCCC	GTGGAAAGGACGAAACACCG	GTTTAAGAGCTATGCTGGAAACAGCATA	GTGGAAAGGACGAAACACCGAAGAGCAATGCGTCGACCCCGTTTAAGAGCTATGCTGGAAACAGCATA
CBLC_1425.18	GAGAGGTGGCCCATTCTCGG	GTGGAAAGGACGAAACACCG	GTTTAAGAGCTATGCTGGAAACAGCATA	GTGGAAAGGACGAAACACCGGAGAGGTGGCCCATTCTCGGGTTTAAGAGCTATGCTGGAAACAGCATA
CBLC_1425.44	GTGCCAACGACGAGCTCTTC	GTGGAAAGGACGAAACACCG	GTTTAAGAGCTATGCTGGAAACAGCATA	GTGGAAAGGACGAAACACCGGTGCCAACGACGAGCTCTTCGTTTAAGAGCTATGCTGGAAACAGCATA
CBLC_1425.249	CCCTCCAGAAGGTGTGGGCG	GTGGAAAGGACGAAACACCG	GTTTAAGAGCTATGCTGGAAACAGCATA	GTGGAAAGGACGAAACACCGCCCTCCAGAAGGTGTGGGCGGTTTAAGAGCTATGCTGGAAACAGCATA
CBLC_1425.230	CAATGGTGGTGCGCAAGGCC	GTGGAAAGGACGAAACACCG	GTTTAAGAGCTATGCTGGAAACAGCATA	GTGGAAAGGACGAAACACCGCAATGGTGGTGCGCAAGGCCGTTTAAGAGCTATGCTGGAAACAGCATA
CBLC_1425.213	ACGCTCTTGGACCTCATCAT	GTGGAAAGGACGAAACACCG	GTTTAAGAGCTATGCTGGAAACAGCATA	GTGGAAAGGACGAAACACCGACGCTCTTGGACCTCATCATGTTTAAGAGCTATGCTGGAAACAGCATA
CBLC_1425.205	ATCTGAGCTCACATAGCCGA	GTGGAAAGGACGAAACACCG	GTTTAAGAGCTATGCTGGAAACAGCATA	GTGGAAAGGACGAAACACCGATCTGAGCTCACATAGCCGAGTTTAAGAGCTATGCTGGAAACAGCATA
CBLC_1425.182	CTGACACGTGGATGCGCTGC	GTGGAAAGGACGAAACACCG	GTTTAAGAGCTATGCTGGAAACAGCATA	GTGGAAAGGACGAAACACCGCTGACACGTGGATGCGCTGCGTTTAAGAGCTATGCTGGAAACAGCATA
CBLC_1425.104	GATGTGAAGATTGAGCCGTG	GTGGAAAGGACGAAACACCG	GTTTAAGAGCTATGCTGGAAACAGCATA	GTGGAAAGGACGAAACACCGGATGTGAAGATTGAGCCGTGGTTTAAGAGCTATGCTGGAAACAGCATA
CBLC_1425.105	ATGTGAAGATTGAGCCGTGC	GTGGAAAGGACGAAACACCG	GTTTAAGAGCTATGCTGGAAACAGCATA	GTGGAAAGGACGAAACACCGATGTGAAGATTGAGCCGTGCGTTTAAGAGCTATGCTGGAAACAGCATA
CBLC_1425.172	TGATCTCGCAGCGGCAGAAG	GTGGAAAGGACGAAACACCG	GTTTAAGAGCTATGCTGGAAACAGCATA	GTGGAAAGGACGAAACACCGTGATCTCGCAGCGGCAGAAGGTTTAAGAGCTATGCTGGAAACAGCATA
CBLC_1425.170	CTTGATCTCGCAGCGGCAGA	GTGGAAAGGACGAAACACCG	GTTTAAGAGCTATGCTGGAAACAGCATA	GTGGAAAGGACGAAACACCGCTTGATCTCGCAGCGGCAGAGTTTAAGAGCTATGCTGGAAACAGCATA
CBLC_1425.109	CTTCTGCCGCTGCGAGATCA	GTGGAAAGGACGAAACACCG	GTTTAAGAGCTATGCTGGAAACAGCATA	GTGGAAAGGACGAAACACCGCTTCTGCCGCTGCGAGATCAGTTTAAGAGCTATGCTGGAAACAGCATA
CBLC_1425.110	TTCTGCCGCTGCGAGATCAA	GTGGAAAGGACGAAACACCG	GTTTAAGAGCTATGCTGGAAACAGCATA	GTGGAAAGGACGAAACACCGTTCTGCCGCTGCGAGATCAAGTTTAAGAGCTATGCTGGAAACAGCATA
CBLC_1425.115	TATCTACCAGTTCCACGGTC	GTGGAAAGGACGAAACACCG	GTTTAAGAGCTATGCTGGAAACAGCATA	GTGGAAAGGACGAAACACCGTATCTACCAGTTCCACGGTCGTTTAAGAGCTATGCTGGAAACAGCATA
CGRRF1_999.34	ACTGTGTTGTTTGCCAGAAT	GTGGAAAGGACGAAACACCG	GTTTAAGAGCTATGCTGGAAACAGCATA	GTGGAAAGGACGAAACACCGACTGTGTTGTTTGCCAGAATGTTTAAGAGCTATGCTGGAAACAGCATA
CGRRF1_999.44	CCCAGTTCACAGTCCCATTC	GTGGAAAGGACGAAACACCG	GTTTAAGAGCTATGCTGGAAACAGCATA	GTGGAAAGGACGAAACACCGCCCAGTTCACAGTCCCATTCGTTTAAGAGCTATGCTGGAAACAGCATA
CGRRF1_999.35	GCCAGAATGGGACTGTGAAC	GTGGAAAGGACGAAACACCG	GTTTAAGAGCTATGCTGGAAACAGCATA	GTGGAAAGGACGAAACACCGGCCAGAATGGGACTGTGAACGTTTAAGAGCTATGCTGGAAACAGCATA
CGRRF1_999.36	CCAGAATGGGACTGTGAACT	GTGGAAAGGACGAAACACCG	GTTTAAGAGCTATGCTGGAAACAGCATA	GTGGAAAGGACGAAACACCGCCAGAATGGGACTGTGAACTGTTTAAGAGCTATGCTGGAAACAGCATA
CGRRF1_999.37	AGACACACATGCCTGTGTGA	GTGGAAAGGACGAAACACCG	GTTTAAGAGCTATGCTGGAAACAGCATA	GTGGAAAGGACGAAACACCGAGACACACATGCCTGTGTGAGTTTAAGAGCTATGCTGGAAACAGCATA
CGRRF1_999.38	TTCAGCAGTGCCCAATGTGC	GTGGAAAGGACGAAACACCG	GTTTAAGAGCTATGCTGGAAACAGCATA	GTGGAAAGGACGAAACACCGTTCAGCAGTGCCCAATGTGCGTTTAAGAGCTATGCTGGAAACAGCATA
CHFR_1995.6	ACGGCTCCTGCGTCTGGGCG	GTGGAAAGGACGAAACACCG	GTTTAAGAGCTATGCTGGAAACAGCATA	GTGGAAAGGACGAAACACCGACGGCTCCTGCGTCTGGGCGGTTTAAGAGCTATGCTGGAAACAGCATA
CHFR_1995.303	CGCTTCCTCAGGAGGACGTG	GTGGAAAGGACGAAACACCG	GTTTAAGAGCTATGCTGGAAACAGCATA	GTGGAAAGGACGAAACACCGCGCTTCCTCAGGAGGACGTGGTTTAAGAGCTATGCTGGAAACAGCATA
CHFR_1995.296	CCAGAGACCAGTTTATTGCT	GTGGAAAGGACGAAACACCG	GTTTAAGAGCTATGCTGGAAACAGCATA	GTGGAAAGGACGAAACACCGCCAGAGACCAGTTTATTGCTGTTTAAGAGCTATGCTGGAAACAGCATA
CHFR_1995.238	CGCAGTCGTGCAGCAGGTCC	GTGGAAAGGACGAAACACCG	GTTTAAGAGCTATGCTGGAAACAGCATA	GTGGAAAGGACGAAACACCGCGCAGTCGTGCAGCAGGTCCGTTTAAGAGCTATGCTGGAAACAGCATA
CHFR_1995.235	CGCGCAGAACGTGTGCATGC	GTGGAAAGGACGAAACACCG	GTTTAAGAGCTATGCTGGAAACAGCATA	GTGGAAAGGACGAAACACCGCGCGCAGAACGTGTGCATGCGTTTAAGAGCTATGCTGGAAACAGCATA
CHFR_1995.84	TTCTGCGCGGCTTGCTACTC	GTGGAAAGGACGAAACACCG	GTTTAAGAGCTATGCTGGAAACAGCATA	GTGGAAAGGACGAAACACCGTTCTGCGCGGCTTGCTACTCGTTTAAGAGCTATGCTGGAAACAGCATA
CHFR_1995.85	GCGCGGCTTGCTACTCGGGC	GTGGAAAGGACGAAACACCG	GTTTAAGAGCTATGCTGGAAACAGCATA	GTGGAAAGGACGAAACACCGGCGCGGCTTGCTACTCGGGCGTTTAAGAGCTATGCTGGAAACAGCATA
CHFR_1995.233	GACAGCGGCAGGTAGGACAC	GTGGAAAGGACGAAACACCG	GTTTAAGAGCTATGCTGGAAACAGCATA	GTGGAAAGGACGAAACACCGGACAGCGGCAGGTAGGACACGTTTAAGAGCTATGCTGGAAACAGCATA
CHFR_1995.231	CCGCTCCACGGGACAGCGGC	GTGGAAAGGACGAAACACCG	GTTTAAGAGCTATGCTGGAAACAGCATA	GTGGAAAGGACGAAACACCGCCGCTCCACGGGACAGCGGCGTTTAAGAGCTATGCTGGAAACAGCATA
CNBP_540.17	TGTTATCGCTGTGGTGAGTC	GTGGAAAGGACGAAACACCG	GTTTAAGAGCTATGCTGGAAACAGCATA	GTGGAAAGGACGAAACACCGTGTTATCGCTGTGGTGAGTCGTTTAAGAGCTATGCTGGAAACAGCATA
CNBP_540.22	GCCTGCTATAACTGCGGTAG	GTGGAAAGGACGAAACACCG	GTTTAAGAGCTATGCTGGAAACAGCATA	GTGGAAAGGACGAAACACCGGCCTGCTATAACTGCGGTAGGTTTAAGAGCTATGCTGGAAACAGCATA
CNBP_540.45	GGTCGCAGTCACGAGCCAGA	GTGGAAAGGACGAAACACCG	GTTTAAGAGCTATGCTGGAAACAGCATA	GTGGAAAGGACGAAACACCGGGTCGCAGTCACGAGCCAGAGTTTAAGAGCTATGCTGGAAACAGCATA
CNBP_540.34	GAAGTCAACTGTTACCGCTG	GTGGAAAGGACGAAACACCG	GTTTAAGAGCTATGCTGGAAACAGCATA	GTGGAAAGGACGAAACACCGGAAGTCAACTGTTACCGCTGGTTTAAGAGCTATGCTGGAAACAGCATA
CNOT4_2142.282	ATGCAAAGAGGGCACTCCAC	GTGGAAAGGACGAAACACCG	GTTTAAGAGCTATGCTGGAAACAGCATA	GTGGAAAGGACGAAACACCGATGCAAAGAGGGCACTCCACGTTTAAGAGCTATGCTGGAAACAGCATA
CNOT4_2142.281	CCAAGGGCTCCATGCAAAGA	GTGGAAAGGACGAAACACCG	GTTTAAGAGCTATGCTGGAAACAGCATA	GTGGAAAGGACGAAACACCGCCAAGGGCTCCATGCAAAGAGTTTAAGAGCTATGCTGGAAACAGCATA
CNOT4_2142.280	TCCAAGGGCTCCATGCAAAG	GTGGAAAGGACGAAACACCG	GTTTAAGAGCTATGCTGGAAACAGCATA	GTGGAAAGGACGAAACACCGTCCAAGGGCTCCATGCAAAGGTTTAAGAGCTATGCTGGAAACAGCATA
CNOT4_2142.277	TCTGGTAGCCACAGGTGCAA	GTGGAAAGGACGAAACACCG	GTTTAAGAGCTATGCTGGAAACAGCATA	GTGGAAAGGACGAAACACCGTCTGGTAGCCACAGGTGCAAGTTTAAGAGCTATGCTGGAAACAGCATA
CNOT4_2142.275	TCGGCAAATCTGGTAGCCAC	GTGGAAAGGACGAAACACCG	GTTTAAGAGCTATGCTGGAAACAGCATA	GTGGAAAGGACGAAACACCGTCGGCAAATCTGGTAGCCACGTTTAAGAGCTATGCTGGAAACAGCATA
CNOT4_2142.274	GCCAACAAAATCGGCAAATC	GTGGAAAGGACGAAACACCG	GTTTAAGAGCTATGCTGGAAACAGCATA	GTGGAAAGGACGAAACACCGGCCAACAAAATCGGCAAATCGTTTAAGAGCTATGCTGGAAACAGCATA
CNOT4_2142.6	CGAATTCGCACTGATGAAAA	GTGGAAAGGACGAAACACCG	GTTTAAGAGCTATGCTGGAAACAGCATA	GTGGAAAGGACGAAACACCGCGAATTCGCACTGATGAAAAGTTTAAGAGCTATGCTGGAAACAGCATA
CNOT4_2142.259	GTTACATAAGCACTGGCACT	GTGGAAAGGACGAAACACCG	GTTTAAGAGCTATGCTGGAAACAGCATA	GTGGAAAGGACGAAACACCGGTTACATAAGCACTGGCACTGTTTAAGAGCTATGCTGGAAACAGCATA
CNOT4_2142.257	AGCGTCTTCTGACCGGATAT	GTGGAAAGGACGAAACACCG	GTTTAAGAGCTATGCTGGAAACAGCATA	GTGGAAAGGACGAAACACCGAGCGTCTTCTGACCGGATATGTTTAAGAGCTATGCTGGAAACAGCATA
CNOT4_2142.21	GTCAACAATGTGGTAGTAGA	GTGGAAAGGACGAAACACCG	GTTTAAGAGCTATGCTGGAAACAGCATA	GTGGAAAGGACGAAACACCGGTCAACAATGTGGTAGTAGAGTTTAAGAGCTATGCTGGAAACAGCATA
COMMD3_588.13	GCGAATAGAACTGTTTTGCA	GTGGAAAGGACGAAACACCG	GTTTAAGAGCTATGCTGGAAACAGCATA	GTGGAAAGGACGAAACACCGGCGAATAGAACTGTTTTGCAGTTTAAGAGCTATGCTGGAAACAGCATA
COMMD3_588.14	GAATTCCCTAGAAATCCTAC	GTGGAAAGGACGAAACACCG	GTTTAAGAGCTATGCTGGAAACAGCATA	GTGGAAAGGACGAAACACCGGAATTCCCTAGAAATCCTACGTTTAAGAGCTATGCTGGAAACAGCATA
COMMD3_588.19	AACGGATGTTTCTTGGCGCT	GTGGAAAGGACGAAACACCG	GTTTAAGAGCTATGCTGGAAACAGCATA	GTGGAAAGGACGAAACACCGAACGGATGTTTCTTGGCGCTGTTTAAGAGCTATGCTGGAAACAGCATA
COMMD3_588.36	CTTAAGGTCACCAAATATGC	GTGGAAAGGACGAAACACCG	GTTTAAGAGCTATGCTGGAAACAGCATA	GTGGAAAGGACGAAACACCGCTTAAGGTCACCAAATATGCGTTTAAGAGCTATGCTGGAAACAGCATA
COMMD3_588.34	ACTAATCTCTGGATAGGATG	GTGGAAAGGACGAAACACCG	GTTTAAGAGCTATGCTGGAAACAGCATA	GTGGAAAGGACGAAACACCGACTAATCTCTGGATAGGATGGTTTAAGAGCTATGCTGGAAACAGCATA
COMMD3_588.28	TAAAGATGCTTCGAAAAGCC	GTGGAAAGGACGAAACACCG	GTTTAAGAGCTATGCTGGAAACAGCATA	GTGGAAAGGACGAAACACCGTAAAGATGCTTCGAAAAGCCGTTTAAGAGCTATGCTGGAAACAGCATA
CUL7_5349.866	CCGAAACTCGCCCTCATCCC	GTGGAAAGGACGAAACACCG	GTTTAAGAGCTATGCTGGAAACAGCATA	GTGGAAAGGACGAAACACCGCCGAAACTCGCCCTCATCCCGTTTAAGAGCTATGCTGGAAACAGCATA
CUL7_5349.726	GGATGCCCCGGCGCATGTGC	GTGGAAAGGACGAAACACCG	GTTTAAGAGCTATGCTGGAAACAGCATA	GTGGAAAGGACGAAACACCGGGATGCCCCGGCGCATGTGCGTTTAAGAGCTATGCTGGAAACAGCATA
CUL7_5349.285	CGGCCCGAGTGGTGGTGTGC	GTGGAAAGGACGAAACACCG	GTTTAAGAGCTATGCTGGAAACAGCATA	GTGGAAAGGACGAAACACCGCGGCCCGAGTGGTGGTGTGCGTTTAAGAGCTATGCTGGAAACAGCATA
CUL7_5349.638	TTAAAGTGCTCACAGTAGCG	GTGGAAAGGACGAAACACCG	GTTTAAGAGCTATGCTGGAAACAGCATA	GTGGAAAGGACGAAACACCGTTAAAGTGCTCACAGTAGCGGTTTAAGAGCTATGCTGGAAACAGCATA
CUL7_5349.368	ATCCAGGGCAGCCGGATCGG	GTGGAAAGGACGAAACACCG	GTTTAAGAGCTATGCTGGAAACAGCATA	GTGGAAAGGACGAAACACCGATCCAGGGCAGCCGGATCGGGTTTAAGAGCTATGCTGGAAACAGCATA
CUL7_5349.381	GGGCGTGGTCTCGAGCTGGC	GTGGAAAGGACGAAACACCG	GTTTAAGAGCTATGCTGGAAACAGCATA	GTGGAAAGGACGAAACACCGGGGCGTGGTCTCGAGCTGGCGTTTAAGAGCTATGCTGGAAACAGCATA
CUL7_5349.601	GGAGCTGGTAGACGTGGAAC	GTGGAAAGGACGAAACACCG	GTTTAAGAGCTATGCTGGAAACAGCATA	GTGGAAAGGACGAAACACCGGGAGCTGGTAGACGTGGAACGTTTAAGAGCTATGCTGGAAACAGCATA
CUL7_5349.420	TTGTCCTGTCCCGACACTCC	GTGGAAAGGACGAAACACCG	GTTTAAGAGCTATGCTGGAAACAGCATA	GTGGAAAGGACGAAACACCGTTGTCCTGTCCCGACACTCCGTTTAAGAGCTATGCTGGAAACAGCATA
CUL7_5349.579	CAAAGTGCCCCTCAGGTAGG	GTGGAAAGGACGAAACACCG	GTTTAAGAGCTATGCTGGAAACAGCATA	GTGGAAAGGACGAAACACCGCAAAGTGCCCCTCAGGTAGGGTTTAAGAGCTATGCTGGAAACAGCATA
CUL7_5349.439	GAGAGTCTGCTGGCGTTCTC	GTGGAAAGGACGAAACACCG	GTTTAAGAGCTATGCTGGAAACAGCATA	GTGGAAAGGACGAAACACCGGAGAGTCTGCTGGCGTTCTCGTTTAAGAGCTATGCTGGAAACAGCATA
CUL7_5349.545	CCTTGAGGATTCGGACGATG	GTGGAAAGGACGAAACACCG	GTTTAAGAGCTATGCTGGAAACAGCATA	GTGGAAAGGACGAAACACCGCCTTGAGGATTCGGACGATGGTTTAAGAGCTATGCTGGAAACAGCATA
CUL7_5349.534	TGCATGCAGACCCCTTACCA	GTGGAAAGGACGAAACACCG	GTTTAAGAGCTATGCTGGAAACAGCATA	GTGGAAAGGACGAAACACCGTGCATGCAGACCCCTTACCAGTTTAAGAGCTATGCTGGAAACAGCATA
CUL9_7554.1217	TCCGCACTCGCATCCCTGGC	GTGGAAAGGACGAAACACCG	GTTTAAGAGCTATGCTGGAAACAGCATA	GTGGAAAGGACGAAACACCGTCCGCACTCGCATCCCTGGCGTTTAAGAGCTATGCTGGAAACAGCATA
CUL9_7554.310	ACTCAAGCTACATGCCAGCC	GTGGAAAGGACGAAACACCG	GTTTAAGAGCTATGCTGGAAACAGCATA	GTGGAAAGGACGAAACACCGACTCAAGCTACATGCCAGCCGTTTAAGAGCTATGCTGGAAACAGCATA
CUL9_7554.913	GTAACGAGGCACAAAGTCTG	GTGGAAAGGACGAAACACCG	GTTTAAGAGCTATGCTGGAAACAGCATA	GTGGAAAGGACGAAACACCGGTAACGAGGCACAAAGTCTGGTTTAAGAGCTATGCTGGAAACAGCATA
CUL9_7554.900	CTCCAGGGGCTCCACCAATC	GTGGAAAGGACGAAACACCG	GTTTAAGAGCTATGCTGGAAACAGCATA	GTGGAAAGGACGAAACACCGCTCCAGGGGCTCCACCAATCGTTTAAGAGCTATGCTGGAAACAGCATA
CUL9_7554.413	GAGCTTTGGTTCGAGCTGGC	GTGGAAAGGACGAAACACCG	GTTTAAGAGCTATGCTGGAAACAGCATA	GTGGAAAGGACGAAACACCGGAGCTTTGGTTCGAGCTGGCGTTTAAGAGCTATGCTGGAAACAGCATA
CUL9_7554.421	GCGGCTCGACAAGTTGTTCT	GTGGAAAGGACGAAACACCG	GTTTAAGAGCTATGCTGGAAACAGCATA	GTGGAAAGGACGAAACACCGGCGGCTCGACAAGTTGTTCTGTTTAAGAGCTATGCTGGAAACAGCATA
CUL9_7554.850	GTCCACTGCAGTCGCCGATG	GTGGAAAGGACGAAACACCG	GTTTAAGAGCTATGCTGGAAACAGCATA	GTGGAAAGGACGAAACACCGGTCCACTGCAGTCGCCGATGGTTTAAGAGCTATGCTGGAAACAGCATA
CUL9_7554.837	GGTCAAAGGGCCATTCCCTG	GTGGAAAGGACGAAACACCG	GTTTAAGAGCTATGCTGGAAACAGCATA	GTGGAAAGGACGAAACACCGGGTCAAAGGGCCATTCCCTGGTTTAAGAGCTATGCTGGAAACAGCATA
CUL9_7554.813	GACAAACCAGCTGATCAATG	GTGGAAAGGACGAAACACCG	GTTTAAGAGCTATGCTGGAAACAGCATA	GTGGAAAGGACGAAACACCGGACAAACCAGCTGATCAATGGTTTAAGAGCTATGCTGGAAACAGCATA
CUL9_7554.805	GAGGACATCTGTACTGGTAC	GTGGAAAGGACGAAACACCG	GTTTAAGAGCTATGCTGGAAACAGCATA	GTGGAAAGGACGAAACACCGGAGGACATCTGTACTGGTACGTTTAAGAGCTATGCTGGAAACAGCATA
CUL9_7554.727	AGCTCTCCACATAGCCACGC	GTGGAAAGGACGAAACACCG	GTTTAAGAGCTATGCTGGAAACAGCATA	GTGGAAAGGACGAAACACCGAGCTCTCCACATAGCCACGCGTTTAAGAGCTATGCTGGAAACAGCATA
CUL9_7554.539	ACCTGGTGCACCAACCCCCA	GTGGAAAGGACGAAACACCG	GTTTAAGAGCTATGCTGGAAACAGCATA	GTGGAAAGGACGAAACACCGACCTGGTGCACCAACCCCCAGTTTAAGAGCTATGCTGGAAACAGCATA
CUL9_7554.540	CGACCGCATCCTGTGCCGCC	GTGGAAAGGACGAAACACCG	GTTTAAGAGCTATGCTGGAAACAGCATA	GTGGAAAGGACGAAACACCGCGACCGCATCCTGTGCCGCCGTTTAAGAGCTATGCTGGAAACAGCATA
CUL9_7554.547	CCACCTGCTCCAAGTGTGGC	GTGGAAAGGACGAAACACCG	GTTTAAGAGCTATGCTGGAAACAGCATA	GTGGAAAGGACGAAACACCGCCACCTGCTCCAAGTGTGGCGTTTAAGAGCTATGCTGGAAACAGCATA
CUL9_7554.556	CTACTATGACGGCATGAGCG	GTGGAAAGGACGAAACACCG	GTTTAAGAGCTATGCTGGAAACAGCATA	GTGGAAAGGACGAAACACCGCTACTATGACGGCATGAGCGGTTTAAGAGCTATGCTGGAAACAGCATA
CUL9_7554.703	ACAGCGCTTGGAGATGAGCT	GTGGAAAGGACGAAACACCG	GTTTAAGAGCTATGCTGGAAACAGCATA	GTGGAAAGGACGAAACACCGACAGCGCTTGGAGATGAGCTGTTTAAGAGCTATGCTGGAAACAGCATA
CUL9_7554.699	CACCCCTCGTTCTTCTCGAT	GTGGAAAGGACGAAACACCG	GTTTAAGAGCTATGCTGGAAACAGCATA	GTGGAAAGGACGAAACACCGCACCCCTCGTTCTTCTCGATGTTTAAGAGCTATGCTGGAAACAGCATA
CUL9_7554.562	CTCCCATCGAGAAGAACGAG	GTGGAAAGGACGAAACACCG	GTTTAAGAGCTATGCTGGAAACAGCATA	GTGGAAAGGACGAAACACCGCTCCCATCGAGAAGAACGAGGTTTAAGAGCTATGCTGGAAACAGCATA
CUL9_7554.564	AATGTAACCATGGATTCTGC	GTGGAAAGGACGAAACACCG	GTTTAAGAGCTATGCTGGAAACAGCATA	GTGGAAAGGACGAAACACCGAATGTAACCATGGATTCTGCGTTTAAGAGCTATGCTGGAAACAGCATA
CYHR1_1089.173	TCCACTCGGCCCCCGGCTTG	GTGGAAAGGACGAAACACCG	GTTTAAGAGCTATGCTGGAAACAGCATA	GTGGAAAGGACGAAACACCGTCCACTCGGCCCCCGGCTTGGTTTAAGAGCTATGCTGGAAACAGCATA
CYHR1_1089.2	AGCCCTGTCCCATCTGGTGC	GTGGAAAGGACGAAACACCG	GTTTAAGAGCTATGCTGGAAACAGCATA	GTGGAAAGGACGAAACACCGAGCCCTGTCCCATCTGGTGCGTTTAAGAGCTATGCTGGAAACAGCATA
CYHR1_1089.15	ACACACGAAGACTGCCTTGC	GTGGAAAGGACGAAACACCG	GTTTAAGAGCTATGCTGGAAACAGCATA	GTGGAAAGGACGAAACACCGACACACGAAGACTGCCTTGCGTTTAAGAGCTATGCTGGAAACAGCATA
CYHR1_1089.19	GCCTGGGTGGCCACCGTCAT	GTGGAAAGGACGAAACACCG	GTTTAAGAGCTATGCTGGAAACAGCATA	GTGGAAAGGACGAAACACCGGCCTGGGTGGCCACCGTCATGTTTAAGAGCTATGCTGGAAACAGCATA
CYHR1_1089.23	AATGGTCACTTGATGTGCGC	GTGGAAAGGACGAAACACCG	GTTTAAGAGCTATGCTGGAAACAGCATA	GTGGAAAGGACGAAACACCGAATGGTCACTTGATGTGCGCGTTTAAGAGCTATGCTGGAAACAGCATA
CYHR1_1	AATGGTCACTTGATGTGCGC	GTGGAAAGGACGAAACACCG	GTTTAAGAGCTATGCTGGAAACAGCATA	GTGGAAAGGACGAAACACCGAATGGTCACTTGATGTGCGCGTTTAAGAGCTATGCTGGAAACAGCATA
CYHR1_2	ATTAGTACACTGGTACACGG	GTGGAAAGGACGAAACACCG	GTTTAAGAGCTATGCTGGAAACAGCATA	GTGGAAAGGACGAAACACCGATTAGTACACTGGTACACGGGTTTAAGAGCTATGCTGGAAACAGCATA
CYHR1_3	TCCGTGTACCAGTGTACTAA	GTGGAAAGGACGAAACACCG	GTTTAAGAGCTATGCTGGAAACAGCATA	GTGGAAAGGACGAAACACCGTCCGTGTACCAGTGTACTAAGTTTAAGAGCTATGCTGGAAACAGCATA
CYHR1_4	TCAGCCGGGCATCTGCTAGT	GTGGAAAGGACGAAACACCG	GTTTAAGAGCTATGCTGGAAACAGCATA	GTGGAAAGGACGAAACACCGTCAGCCGGGCATCTGCTAGTGTTTAAGAGCTATGCTGGAAACAGCATA
CYHR1_5	TCAAGTGACCATTAGTACAC	GTGGAAAGGACGAAACACCG	GTTTAAGAGCTATGCTGGAAACAGCATA	GTGGAAAGGACGAAACACCGTCAAGTGACCATTAGTACACGTTTAAGAGCTATGCTGGAAACAGCATA
CYHR1_6	GCCGGGCATCTGCTAGTAGG	GTGGAAAGGACGAAACACCG	GTTTAAGAGCTATGCTGGAAACAGCATA	GTGGAAAGGACGAAACACCGGCCGGGCATCTGCTAGTAGGGTTTAAGAGCTATGCTGGAAACAGCATA
DCST1_2121.27	TATGTTCTTGTACAGCTTGG	GTGGAAAGGACGAAACACCG	GTTTAAGAGCTATGCTGGAAACAGCATA	GTGGAAAGGACGAAACACCGTATGTTCTTGTACAGCTTGGGTTTAAGAGCTATGCTGGAAACAGCATA
DCST1_2121.338	TGGCAGCCAAGGCGTATCCC	GTGGAAAGGACGAAACACCG	GTTTAAGAGCTATGCTGGAAACAGCATA	GTGGAAAGGACGAAACACCGTGGCAGCCAAGGCGTATCCCGTTTAAGAGCTATGCTGGAAACAGCATA
DCST1_2121.116	TCTGCCAGATCGATGACCGC	GTGGAAAGGACGAAACACCG	GTTTAAGAGCTATGCTGGAAACAGCATA	GTGGAAAGGACGAAACACCGTCTGCCAGATCGATGACCGCGTTTAAGAGCTATGCTGGAAACAGCATA
DCST1_2121.252	GTGGCGGATGGTGTCGAAGA	GTGGAAAGGACGAAACACCG	GTTTAAGAGCTATGCTGGAAACAGCATA	GTGGAAAGGACGAAACACCGGTGGCGGATGGTGTCGAAGAGTTTAAGAGCTATGCTGGAAACAGCATA
DCST1_2121.243	TCGAAGAAGCCGGGCTAGCA	GTGGAAAGGACGAAACACCG	GTTTAAGAGCTATGCTGGAAACAGCATA	GTGGAAAGGACGAAACACCGTCGAAGAAGCCGGGCTAGCAGTTTAAGAGCTATGCTGGAAACAGCATA
DCST1_2121.225	AGACACACTAACAGGCCAAT	GTGGAAAGGACGAAACACCG	GTTTAAGAGCTATGCTGGAAACAGCATA	GTGGAAAGGACGAAACACCGAGACACACTAACAGGCCAATGTTTAAGAGCTATGCTGGAAACAGCATA
DCST1_2121.154	CTTTTGGCTACCGACTCCGG	GTGGAAAGGACGAAACACCG	GTTTAAGAGCTATGCTGGAAACAGCATA	GTGGAAAGGACGAAACACCGCTTTTGGCTACCGACTCCGGGTTTAAGAGCTATGCTGGAAACAGCATA
DCST1_2121.198	ACTCGGGCGTCTCGGGTGCC	GTGGAAAGGACGAAACACCG	GTTTAAGAGCTATGCTGGAAACAGCATA	GTGGAAAGGACGAAACACCGACTCGGGCGTCTCGGGTGCCGTTTAAGAGCTATGCTGGAAACAGCATA
DCST1_2121.195	GTCCGGCACACGTAGGACTC	GTGGAAAGGACGAAACACCG	GTTTAAGAGCTATGCTGGAAACAGCATA	GTGGAAAGGACGAAACACCGGTCCGGCACACGTAGGACTCGTTTAAGAGCTATGCTGGAAACAGCATA
DCST1_2121.172	GTCCTACGTGTGCCGGACGC	GTGGAAAGGACGAAACACCG	GTTTAAGAGCTATGCTGGAAACAGCATA	GTGGAAAGGACGAAACACCGGTCCTACGTGTGCCGGACGCGTTTAAGAGCTATGCTGGAAACAGCATA
DCST1_2121.174	ACTGCGAGGCCGTGTACTGC	GTGGAAAGGACGAAACACCG	GTTTAAGAGCTATGCTGGAAACAGCATA	GTGGAAAGGACGAAACACCGACTGCGAGGCCGTGTACTGCGTTTAAGAGCTATGCTGGAAACAGCATA
DCST1_2121.177	GGTCGTGCTGGGACGACATG	GTGGAAAGGACGAAACACCG	GTTTAAGAGCTATGCTGGAAACAGCATA	GTGGAAAGGACGAAACACCGGGTCGTGCTGGGACGACATGGTTTAAGAGCTATGCTGGAAACAGCATA
DCST1_2121.190	CTTCGCGGGGCGTGCAGACC	GTGGAAAGGACGAAACACCG	GTTTAAGAGCTATGCTGGAAACAGCATA	GTGGAAAGGACGAAACACCGCTTCGCGGGGCGTGCAGACCGTTTAAGAGCTATGCTGGAAACAGCATA
DTX1_1863.15	CAGCCGCTGGCGGCCCTACA	GTGGAAAGGACGAAACACCG	GTTTAAGAGCTATGCTGGAAACAGCATA	GTGGAAAGGACGAAACACCGCAGCCGCTGGCGGCCCTACAGTTTAAGAGCTATGCTGGAAACAGCATA
DTX1_1863.22	CTCGCGGTTCCGTGGTCCTG	GTGGAAAGGACGAAACACCG	GTTTAAGAGCTATGCTGGAAACAGCATA	GTGGAAAGGACGAAACACCGCTCGCGGTTCCGTGGTCCTGGTTTAAGAGCTATGCTGGAAACAGCATA
DTX1_1863.40	GGGAGAACGACGGCGGCGCA	GTGGAAAGGACGAAACACCG	GTTTAAGAGCTATGCTGGAAACAGCATA	GTGGAAAGGACGAAACACCGGGGAGAACGACGGCGGCGCAGTTTAAGAGCTATGCTGGAAACAGCATA
DTX1_1863.375	GCTGCTTCTCGTAGGCGTTC	GTGGAAAGGACGAAACACCG	GTTTAAGAGCTATGCTGGAAACAGCATA	GTGGAAAGGACGAAACACCGGCTGCTTCTCGTAGGCGTTCGTTTAAGAGCTATGCTGGAAACAGCATA
DTX1_1863.108	CACCATCTGCATGGAGCGAC	GTGGAAAGGACGAAACACCG	GTTTAAGAGCTATGCTGGAAACAGCATA	GTGGAAAGGACGAAACACCGCACCATCTGCATGGAGCGACGTTTAAGAGCTATGCTGGAAACAGCATA
DTX1_1863.110	GGTCACAGCATCAGGCTACG	GTGGAAAGGACGAAACACCG	GTTTAAGAGCTATGCTGGAAACAGCATA	GTGGAAAGGACGAAACACCGGGTCACAGCATCAGGCTACGGTTTAAGAGCTATGCTGGAAACAGCATA
DTX1_1863.112	CAGGCTACGAGGGCGTGCTT	GTGGAAAGGACGAAACACCG	GTTTAAGAGCTATGCTGGAAACAGCATA	GTGGAAAGGACGAAACACCGCAGGCTACGAGGGCGTGCTTGTTTAAGAGCTATGCTGGAAACAGCATA
DTX1_1863.113	CGAGGGCGTGCTTCGGCACA	GTGGAAAGGACGAAACACCG	GTTTAAGAGCTATGCTGGAAACAGCATA	GTGGAAAGGACGAAACACCGCGAGGGCGTGCTTCGGCACAGTTTAAGAGCTATGCTGGAAACAGCATA
DTX1_1863.117	GGCGTGCGGCCTGAGCTCGT	GTGGAAAGGACGAAACACCG	GTTTAAGAGCTATGCTGGAAACAGCATA	GTGGAAAGGACGAAACACCGGGCGTGCGGCCTGAGCTCGTGTTTAAGAGCTATGCTGGAAACAGCATA
DTX1_1863.223	CATTGGAGTACATGGCCACG	GTGGAAAGGACGAAACACCG	GTTTAAGAGCTATGCTGGAAACAGCATA	GTGGAAAGGACGAAACACCGCATTGGAGTACATGGCCACGGTTTAAGAGCTATGCTGGAAACAGCATA
DTX1_1863.217	CCCGTAGATGGCCTTGCAGG	GTGGAAAGGACGAAACACCG	GTTTAAGAGCTATGCTGGAAACAGCATA	GTGGAAAGGACGAAACACCGCCCGTAGATGGCCTTGCAGGGTTTAAGAGCTATGCTGGAAACAGCATA
DTX1_1863.210	GGAAGCCGGGCAGCGAGTGG	GTGGAAAGGACGAAACACCG	GTTTAAGAGCTATGCTGGAAACAGCATA	GTGGAAAGGACGAAACACCGGGAAGCCGGGCAGCGAGTGGGTTTAAGAGCTATGCTGGAAACAGCATA
DTX1_1863.140	GGGAAGAAGTTCACCGCAAG	GTGGAAAGGACGAAACACCG	GTTTAAGAGCTATGCTGGAAACAGCATA	GTGGAAAGGACGAAACACCGGGGAAGAAGTTCACCGCAAGGTTTAAGAGCTATGCTGGAAACAGCATA
DTX1_1863.152	CACGGGCGAGTCGGACACCG	GTGGAAAGGACGAAACACCG	GTTTAAGAGCTATGCTGGAAACAGCATA	GTGGAAAGGACGAAACACCGCACGGGCGAGTCGGACACCGGTTTAAGAGCTATGCTGGAAACAGCATA
DTX2_1869.9	CCGTGTGGGAATGGCAGGAC	GTGGAAAGGACGAAACACCG	GTTTAAGAGCTATGCTGGAAACAGCATA	GTGGAAAGGACGAAACACCGCCGTGTGGGAATGGCAGGACGTTTAAGAGCTATGCTGGAAACAGCATA
DTX2_1869.95	GGCAATCGGGTCCCTAGCTG	GTGGAAAGGACGAAACACCG	GTTTAAGAGCTATGCTGGAAACAGCATA	GTGGAAAGGACGAAACACCGGGCAATCGGGTCCCTAGCTGGTTTAAGAGCTATGCTGGAAACAGCATA
DTX2_1869.96	GCAATCGGGTCCCTAGCTGT	GTGGAAAGGACGAAACACCG	GTTTAAGAGCTATGCTGGAAACAGCATA	GTGGAAAGGACGAAACACCGGCAATCGGGTCCCTAGCTGTGTTTAAGAGCTATGCTGGAAACAGCATA
DTX2_1869.202	TCCATAGATGGTTTTGCAGG	GTGGAAAGGACGAAACACCG	GTTTAAGAGCTATGCTGGAAACAGCATA	GTGGAAAGGACGAAACACCGTCCATAGATGGTTTTGCAGGGTTTAAGAGCTATGCTGGAAACAGCATA
DTX2_1869.101	CCCTCCTGCAAAACCATCTA	GTGGAAAGGACGAAACACCG	GTTTAAGAGCTATGCTGGAAACAGCATA	GTGGAAAGGACGAAACACCGCCCTCCTGCAAAACCATCTAGTTTAAGAGCTATGCTGGAAACAGCATA
DTX2_1869.128	GAGGCGGCTCATCTTCACAG	GTGGAAAGGACGAAACACCG	GTTTAAGAGCTATGCTGGAAACAGCATA	GTGGAAAGGACGAAACACCGGAGGCGGCTCATCTTCACAGGTTTAAGAGCTATGCTGGAAACAGCATA
DTX2_1869.136	AGAGATGGACCGCAACATTA	GTGGAAAGGACGAAACACCG	GTTTAAGAGCTATGCTGGAAACAGCATA	GTGGAAAGGACGAAACACCGAGAGATGGACCGCAACATTAGTTTAAGAGCTATGCTGGAAACAGCATA
DTX3_1053.173	CTCCCCCAGACAGATGGGGC	GTGGAAAGGACGAAACACCG	GTTTAAGAGCTATGCTGGAAACAGCATA	GTGGAAAGGACGAAACACCGCTCCCCCAGACAGATGGGGCGTTTAAGAGCTATGCTGGAAACAGCATA
DTX3_1053.172	GGATCTCCCCCAGACAGATG	GTGGAAAGGACGAAACACCG	GTTTAAGAGCTATGCTGGAAACAGCATA	GTGGAAAGGACGAAACACCGGGATCTCCCCCAGACAGATGGTTTAAGAGCTATGCTGGAAACAGCATA
DTX3_1053.168	CCGGCACTTCTCCAATGTCT	GTGGAAAGGACGAAACACCG	GTTTAAGAGCTATGCTGGAAACAGCATA	GTGGAAAGGACGAAACACCGCCGGCACTTCTCCAATGTCTGTTTAAGAGCTATGCTGGAAACAGCATA
DTX3_1053.57	CCAAGACATTGGAGAAGTGC	GTGGAAAGGACGAAACACCG	GTTTAAGAGCTATGCTGGAAACAGCATA	GTGGAAAGGACGAAACACCGCCAAGACATTGGAGAAGTGCGTTTAAGAGCTATGCTGGAAACAGCATA
DTX3_1053.58	GTGCCGGCATTCATTCTGCG	GTGGAAAGGACGAAACACCG	GTTTAAGAGCTATGCTGGAAACAGCATA	GTGGAAAGGACGAAACACCGGTGCCGGCATTCATTCTGCGGTTTAAGAGCTATGCTGGAAACAGCATA
DTX3_1053.59	TGCCGGCATTCATTCTGCGA	GTGGAAAGGACGAAACACCG	GTTTAAGAGCTATGCTGGAAACAGCATA	GTGGAAAGGACGAAACACCGTGCCGGCATTCATTCTGCGAGTTTAAGAGCTATGCTGGAAACAGCATA
DTX3_1053.61	CTGCGAGGGCTGCATCACCC	GTGGAAAGGACGAAACACCG	GTTTAAGAGCTATGCTGGAAACAGCATA	GTGGAAAGGACGAAACACCGCTGCGAGGGCTGCATCACCCGTTTAAGAGCTATGCTGGAAACAGCATA
DTX3_1053.164	GAAGCGGCCGCACATGGGGC	GTGGAAAGGACGAAACACCG	GTTTAAGAGCTATGCTGGAAACAGCATA	GTGGAAAGGACGAAACACCGGAAGCGGCCGCACATGGGGCGTTTAAGAGCTATGCTGGAAACAGCATA
DTX3_1053.156	AGACCAGCATCCGCCCATTC	GTGGAAAGGACGAAACACCG	GTTTAAGAGCTATGCTGGAAACAGCATA	GTGGAAAGGACGAAACACCGAGACCAGCATCCGCCCATTCGTTTAAGAGCTATGCTGGAAACAGCATA
DTX3_1053.78	GTCTTCCCGCCCGGTGTCCA	GTGGAAAGGACGAAACACCG	GTTTAAGAGCTATGCTGGAAACAGCATA	GTGGAAAGGACGAAACACCGGTCTTCCCGCCCGGTGTCCAGTTTAAGAGCTATGCTGGAAACAGCATA
DTX3_1053.129	GGTCAAACGCCTTGCGGAAC	GTGGAAAGGACGAAACACCG	GTTTAAGAGCTATGCTGGAAACAGCATA	GTGGAAAGGACGAAACACCGGGTCAAACGCCTTGCGGAACGTTTAAGAGCTATGCTGGAAACAGCATA
DTX3_1053.112	TGCACCCGGGTCAGGTAGGT	GTGGAAAGGACGAAACACCG	GTTTAAGAGCTATGCTGGAAACAGCATA	GTGGAAAGGACGAAACACCGTGCACCCGGGTCAGGTAGGTGTTTAAGAGCTATGCTGGAAACAGCATA
DTX3L_2223.79	GGGCATCTGTGTCATCTGTA	GTGGAAAGGACGAAACACCG	GTTTAAGAGCTATGCTGGAAACAGCATA	GTGGAAAGGACGAAACACCGGGGCATCTGTGTCATCTGTAGTTTAAGAGCTATGCTGGAAACAGCATA
DTX3L_2223.213	TGTACACCCGCACGAGGAGC	GTGGAAAGGACGAAACACCG	GTTTAAGAGCTATGCTGGAAACAGCATA	GTGGAAAGGACGAAACACCGTGTACACCCGCACGAGGAGCGTTTAAGAGCTATGCTGGAAACAGCATA
DTX3L_2223.8	AGCTCTAAGTCCTCGGGCGG	GTGGAAAGGACGAAACACCG	GTTTAAGAGCTATGCTGGAAACAGCATA	GTGGAAAGGACGAAACACCGAGCTCTAAGTCCTCGGGCGGGTTTAAGAGCTATGCTGGAAACAGCATA
DTX3L_2223.198	TTCACTGAACTCCACCCGGA	GTGGAAAGGACGAAACACCG	GTTTAAGAGCTATGCTGGAAACAGCATA	GTGGAAAGGACGAAACACCGTTCACTGAACTCCACCCGGAGTTTAAGAGCTATGCTGGAAACAGCATA
DTX3L_2223.136	CAGAATTCATGCTTGCACTT	GTGGAAAGGACGAAACACCG	GTTTAAGAGCTATGCTGGAAACAGCATA	GTGGAAAGGACGAAACACCGCAGAATTCATGCTTGCACTTGTTTAAGAGCTATGCTGGAAACAGCATA
DTX3L_2223.133	GACATGGCTTTGTTGATACA	GTGGAAAGGACGAAACACCG	GTTTAAGAGCTATGCTGGAAACAGCATA	GTGGAAAGGACGAAACACCGGACATGGCTTTGTTGATACAGTTTAAGAGCTATGCTGGAAACAGCATA
DTX3L_2223.130	CCATAGGAAGTCTGGCATGT	GTGGAAAGGACGAAACACCG	GTTTAAGAGCTATGCTGGAAACAGCATA	GTGGAAAGGACGAAACACCGCCATAGGAAGTCTGGCATGTGTTTAAGAGCTATGCTGGAAACAGCATA
DTX3L_2223.129	ACCATAGGAAGTCTGGCATG	GTGGAAAGGACGAAACACCG	GTTTAAGAGCTATGCTGGAAACAGCATA	GTGGAAAGGACGAAACACCGACCATAGGAAGTCTGGCATGGTTTAAGAGCTATGCTGGAAACAGCATA
DTX3L_2223.80	CCCACATGCCAGACTTCCTA	GTGGAAAGGACGAAACACCG	GTTTAAGAGCTATGCTGGAAACAGCATA	GTGGAAAGGACGAAACACCGCCCACATGCCAGACTTCCTAGTTTAAGAGCTATGCTGGAAACAGCATA
DTX3L_2223.128	TCTGAATACCATAGGAAGTC	GTGGAAAGGACGAAACACCG	GTTTAAGAGCTATGCTGGAAACAGCATA	GTGGAAAGGACGAAACACCGTCTGAATACCATAGGAAGTCGTTTAAGAGCTATGCTGGAAACAGCATA
DTX3L_2223.118	ATGCAGTTCGCTGTATTCCA	GTGGAAAGGACGAAACACCG	GTTTAAGAGCTATGCTGGAAACAGCATA	GTGGAAAGGACGAAACACCGATGCAGTTCGCTGTATTCCAGTTTAAGAGCTATGCTGGAAACAGCATA
DTX3L_2223.99	GTGGGGTACTCTCGCGTATT	GTGGAAAGGACGAAACACCG	GTTTAAGAGCTATGCTGGAAACAGCATA	GTGGAAAGGACGAAACACCGGTGGGGTACTCTCGCGTATTGTTTAAGAGCTATGCTGGAAACAGCATA
DTX4_1860.220	CGTGAGGCGTTCCATACAGA	GTGGAAAGGACGAAACACCG	GTTTAAGAGCTATGCTGGAAACAGCATA	GTGGAAAGGACGAAACACCGCGTGAGGCGTTCCATACAGAGTTTAAGAGCTATGCTGGAAACAGCATA
DTX4_1860.103	GAACGCCTCACGGCCCCCTC	GTGGAAAGGACGAAACACCG	GTTTAAGAGCTATGCTGGAAACAGCATA	GTGGAAAGGACGAAACACCGGAACGCCTCACGGCCCCCTCGTTTAAGAGCTATGCTGGAAACAGCATA
DTX4_1860.5	GGCTGAACGAGCACGGCCGC	GTGGAAAGGACGAAACACCG	GTTTAAGAGCTATGCTGGAAACAGCATA	GTGGAAAGGACGAAACACCGGGCTGAACGAGCACGGCCGCGTTTAAGAGCTATGCTGGAAACAGCATA
DTX4_1860.385	GGACCACCGCCTCGATGTGG	GTGGAAAGGACGAAACACCG	GTTTAAGAGCTATGCTGGAAACAGCATA	GTGGAAAGGACGAAACACCGGGACCACCGCCTCGATGTGGGTTTAAGAGCTATGCTGGAAACAGCATA
DTX4_1860.357	TTCCATGTCGTAGGGCGTCC	GTGGAAAGGACGAAACACCG	GTTTAAGAGCTATGCTGGAAACAGCATA	GTGGAAAGGACGAAACACCGTTCCATGTCGTAGGGCGTCCGTTTAAGAGCTATGCTGGAAACAGCATA
DTX4_1860.350	ATGGAAGTGAGGTCGATCCA	GTGGAAAGGACGAAACACCG	GTTTAAGAGCTATGCTGGAAACAGCATA	GTGGAAAGGACGAAACACCGATGGAAGTGAGGTCGATCCAGTTTAAGAGCTATGCTGGAAACAGCATA
DTX4_1860.104	CACGGCCCCCTCAGGCTACA	GTGGAAAGGACGAAACACCG	GTTTAAGAGCTATGCTGGAAACAGCATA	GTGGAAAGGACGAAACACCGCACGGCCCCCTCAGGCTACAGTTTAAGAGCTATGCTGGAAACAGCATA
DTX4_1860.106	CTACAAGGGCCCGCAGCCTA	GTGGAAAGGACGAAACACCG	GTTTAAGAGCTATGCTGGAAACAGCATA	GTGGAAAGGACGAAACACCGCTACAAGGGCCCGCAGCCTAGTTTAAGAGCTATGCTGGAAACAGCATA
DTX4_1860.109	CGGTAAAACCTGACCTGGTA	GTGGAAAGGACGAAACACCG	GTTTAAGAGCTATGCTGGAAACAGCATA	GTGGAAAGGACGAAACACCGCGGTAAAACCTGACCTGGTAGTTTAAGAGCTATGCTGGAAACAGCATA
DTX4_1860.209	GTGGTAGACGTGGCCGCATC	GTGGAAAGGACGAAACACCG	GTTTAAGAGCTATGCTGGAAACAGCATA	GTGGAAAGGACGAAACACCGGTGGTAGACGTGGCCGCATCGTTTAAGAGCTATGCTGGAAACAGCATA
DTX4_1860.113	TGGTTGCCATGTACAACAAT	GTGGAAAGGACGAAACACCG	GTTTAAGAGCTATGCTGGAAACAGCATA	GTGGAAAGGACGAAACACCGTGGTTGCCATGTACAACAATGTTTAAGAGCTATGCTGGAAACAGCATA
DTX4_1860.130	GACCGGAACACCCGAATCCT	GTGGAAAGGACGAAACACCG	GTTTAAGAGCTATGCTGGAAACAGCATA	GTGGAAAGGACGAAACACCGGACCGGAACACCCGAATCCTGTTTAAGAGCTATGCTGGAAACAGCATA
DTX4_1860.171	TCCCTTTCTCGCTGTCCGGA	GTGGAAAGGACGAAACACCG	GTTTAAGAGCTATGCTGGAAACAGCATA	GTGGAAAGGACGAAACACCGTCCCTTTCTCGCTGTCCGGAGTTTAAGAGCTATGCTGGAAACAGCATA
DTX4_1860.140	GCGAGTCAGACACCGTCATC	GTGGAAAGGACGAAACACCG	GTTTAAGAGCTATGCTGGAAACAGCATA	GTGGAAAGGACGAAACACCGGCGAGTCAGACACCGTCATCGTTTAAGAGCTATGCTGGAAACAGCATA
DZIP3_3627.128	TTCACAGGGTCCTGCCACAT	GTGGAAAGGACGAAACACCG	GTTTAAGAGCTATGCTGGAAACAGCATA	GTGGAAAGGACGAAACACCGTTCACAGGGTCCTGCCACATGTTTAAGAGCTATGCTGGAAACAGCATA
DZIP3_3627.150	TTCTCATGACAGATCACACA	GTGGAAAGGACGAAACACCG	GTTTAAGAGCTATGCTGGAAACAGCATA	GTGGAAAGGACGAAACACCGTTCTCATGACAGATCACACAGTTTAAGAGCTATGCTGGAAACAGCATA
DZIP3_3627.148	GCATGGAATTTGTGAGCGCA	GTGGAAAGGACGAAACACCG	GTTTAAGAGCTATGCTGGAAACAGCATA	GTGGAAAGGACGAAACACCGGCATGGAATTTGTGAGCGCAGTTTAAGAGCTATGCTGGAAACAGCATA
DZIP3_3627.133	TAGACCATGGTTGATGCAAC	GTGGAAAGGACGAAACACCG	GTTTAAGAGCTATGCTGGAAACAGCATA	GTGGAAAGGACGAAACACCGTAGACCATGGTTGATGCAACGTTTAAGAGCTATGCTGGAAACAGCATA
DZIP3_3627.135	GACCATGGTTGATGCAACAG	GTGGAAAGGACGAAACACCG	GTTTAAGAGCTATGCTGGAAACAGCATA	GTGGAAAGGACGAAACACCGGACCATGGTTGATGCAACAGGTTTAAGAGCTATGCTGGAAACAGCATA
DZIP3_3627.145	AAAACGTGGAGTCTGCACGT	GTGGAAAGGACGAAACACCG	GTTTAAGAGCTATGCTGGAAACAGCATA	GTGGAAAGGACGAAACACCGAAAACGTGGAGTCTGCACGTGTTTAAGAGCTATGCTGGAAACAGCATA
FANCL_1143.100	CACGGTTTTCGACCGGTTCT	GTGGAAAGGACGAAACACCG	GTTTAAGAGCTATGCTGGAAACAGCATA	GTGGAAAGGACGAAACACCGCACGGTTTTCGACCGGTTCTGTTTAAGAGCTATGCTGGAAACAGCATA
FANCL_1143.92	ATCATAAAGCTCATTAGATC	GTGGAAAGGACGAAACACCG	GTTTAAGAGCTATGCTGGAAACAGCATA	GTGGAAAGGACGAAACACCGATCATAAAGCTCATTAGATCGTTTAAGAGCTATGCTGGAAACAGCATA
FANCL_1143.83	TAACTTGATGGTACTGAAGC	GTGGAAAGGACGAAACACCG	GTTTAAGAGCTATGCTGGAAACAGCATA	GTGGAAAGGACGAAACACCGTAACTTGATGGTACTGAAGCGTTTAAGAGCTATGCTGGAAACAGCATA
FANCL_1143.23	TAGAATCACTAAAGGCATTC	GTGGAAAGGACGAAACACCG	GTTTAAGAGCTATGCTGGAAACAGCATA	GTGGAAAGGACGAAACACCGTAGAATCACTAAAGGCATTCGTTTAAGAGCTATGCTGGAAACAGCATA
FANCL_1143.68	GGGGTCTACCTCTATATTTA	GTGGAAAGGACGAAACACCG	GTTTAAGAGCTATGCTGGAAACAGCATA	GTGGAAAGGACGAAACACCGGGGGTCTACCTCTATATTTAGTTTAAGAGCTATGCTGGAAACAGCATA
FANCL_1143.42	TGTTATGCTTATCAACTTGA	GTGGAAAGGACGAAACACCG	GTTTAAGAGCTATGCTGGAAACAGCATA	GTGGAAAGGACGAAACACCGTGTTATGCTTATCAACTTGAGTTTAAGAGCTATGCTGGAAACAGCATA
FANCL_1143.55	ATCACACACTTGATCAGGAA	GTGGAAAGGACGAAACACCG	GTTTAAGAGCTATGCTGGAAACAGCATA	GTGGAAAGGACGAAACACCGATCACACACTTGATCAGGAAGTTTAAGAGCTATGCTGGAAACAGCATA
FANCL_1143.54	GAATTATCACACACTTGATC	GTGGAAAGGACGAAACACCG	GTTTAAGAGCTATGCTGGAAACAGCATA	GTGGAAAGGACGAAACACCGGAATTATCACACACTTGATCGTTTAAGAGCTATGCTGGAAACAGCATA
FANCL_1143.53	TATAAGCATATTTGATGGAA	GTGGAAAGGACGAAACACCG	GTTTAAGAGCTATGCTGGAAACAGCATA	GTGGAAAGGACGAAACACCGTATAAGCATATTTGATGGAAGTTTAAGAGCTATGCTGGAAACAGCATA
FANCL_1143.47	CCAATTACCTTAAAAATGTC	GTGGAAAGGACGAAACACCG	GTTTAAGAGCTATGCTGGAAACAGCATA	GTGGAAAGGACGAAACACCGCCAATTACCTTAAAAATGTCGTTTAAGAGCTATGCTGGAAACAGCATA
HLTF_3030.8	GTTGGACTACGCTATTACAC	GTGGAAAGGACGAAACACCG	GTTTAAGAGCTATGCTGGAAACAGCATA	GTGGAAAGGACGAAACACCGGTTGGACTACGCTATTACACGTTTAAGAGCTATGCTGGAAACAGCATA
HLTF_3030.40	TCTAGCTTGGATGGTGTCAC	GTGGAAAGGACGAAACACCG	GTTTAAGAGCTATGCTGGAAACAGCATA	GTGGAAAGGACGAAACACCGTCTAGCTTGGATGGTGTCACGTTTAAGAGCTATGCTGGAAACAGCATA
HLTF_3030.45	CGACCAGAAAATGTCCATGG	GTGGAAAGGACGAAACACCG	GTTTAAGAGCTATGCTGGAAACAGCATA	GTGGAAAGGACGAAACACCGCGACCAGAAAATGTCCATGGGTTTAAGAGCTATGCTGGAAACAGCATA
HLTF_3030.183	GCCGGTTCTCTAATACGATC	GTGGAAAGGACGAAACACCG	GTTTAAGAGCTATGCTGGAAACAGCATA	GTGGAAAGGACGAAACACCGGCCGGTTCTCTAATACGATCGTTTAAGAGCTATGCTGGAAACAGCATA
HLTF_3030.81	GTCCATTACATAGCATAAGG	GTGGAAAGGACGAAACACCG	GTTTAAGAGCTATGCTGGAAACAGCATA	GTGGAAAGGACGAAACACCGGTCCATTACATAGCATAAGGGTTTAAGAGCTATGCTGGAAACAGCATA
HLTF_3030.169	CGTTCTGGTAACTCCAAAAC	GTGGAAAGGACGAAACACCG	GTTTAAGAGCTATGCTGGAAACAGCATA	GTGGAAAGGACGAAACACCGCGTTCTGGTAACTCCAAAACGTTTAAGAGCTATGCTGGAAACAGCATA
HLTF_3030.133	CTTGCTTCTGACCAAGTCTA	GTGGAAAGGACGAAACACCG	GTTTAAGAGCTATGCTGGAAACAGCATA	GTGGAAAGGACGAAACACCGCTTGCTTCTGACCAAGTCTAGTTTAAGAGCTATGCTGGAAACAGCATA
HLTF_3030.157	CAGGAACTGTTAAAGAATCC	GTGGAAAGGACGAAACACCG	GTTTAAGAGCTATGCTGGAAACAGCATA	GTGGAAAGGACGAAACACCGCAGGAACTGTTAAAGAATCCGTTTAAGAGCTATGCTGGAAACAGCATA
HLTF_3030.156	TGTGCACAATGTGTTATCAC	GTGGAAAGGACGAAACACCG	GTTTAAGAGCTATGCTGGAAACAGCATA	GTGGAAAGGACGAAACACCGTGTGCACAATGTGTTATCACGTTTAAGAGCTATGCTGGAAACAGCATA
HLTF_3030.154	CTGAATGACTTGGCAAATAC	GTGGAAAGGACGAAACACCG	GTTTAAGAGCTATGCTGGAAACAGCATA	GTGGAAAGGACGAAACACCGCTGAATGACTTGGCAAATACGTTTAAGAGCTATGCTGGAAACAGCATA
HLTF_3030.152	CATAAAGGGCATTTAGCATG	GTGGAAAGGACGAAACACCG	GTTTAAGAGCTATGCTGGAAACAGCATA	GTGGAAAGGACGAAACACCGCATAAAGGGCATTTAGCATGGTTTAAGAGCTATGCTGGAAACAGCATA
HLTF_3030.150	TGTATATCATTTCTGCATAA	GTGGAAAGGACGAAACACCG	GTTTAAGAGCTATGCTGGAAACAGCATA	GTGGAAAGGACGAAACACCGTGTATATCATTTCTGCATAAGTTTAAGAGCTATGCTGGAAACAGCATA
IRF2BP1_1755.2	CGACCTGCCCAAGATGCCGT	GTGGAAAGGACGAAACACCG	GTTTAAGAGCTATGCTGGAAACAGCATA	GTGGAAAGGACGAAACACCGCGACCTGCCCAAGATGCCGTGTTTAAGAGCTATGCTGGAAACAGCATA
IRF2BP1_1755.8	TCGCGGCTGCGTGAACTTCG	GTGGAAAGGACGAAACACCG	GTTTAAGAGCTATGCTGGAAACAGCATA	GTGGAAAGGACGAAACACCGTCGCGGCTGCGTGAACTTCGGTTTAAGAGCTATGCTGGAAACAGCATA
IRF2BP1_1755.220	TTCTAGCCGCTCCCTGCACA	GTGGAAAGGACGAAACACCG	GTTTAAGAGCTATGCTGGAAACAGCATA	GTGGAAAGGACGAAACACCGTTCTAGCCGCTCCCTGCACAGTTTAAGAGCTATGCTGGAAACAGCATA
IRF2BP1_1755.218	CGAGGGGCACTGGACGAAGT	GTGGAAAGGACGAAACACCG	GTTTAAGAGCTATGCTGGAAACAGCATA	GTGGAAAGGACGAAACACCGCGAGGGGCACTGGACGAAGTGTTTAAGAGCTATGCTGGAAACAGCATA
IRF2BP1_1755.171	GTCCAGTGCCCCTCGGTGCC	GTGGAAAGGACGAAACACCG	GTTTAAGAGCTATGCTGGAAACAGCATA	GTGGAAAGGACGAAACACCGGTCCAGTGCCCCTCGGTGCCGTTTAAGAGCTATGCTGGAAACAGCATA
IRF2BP1_1755.214	AACTTGTGTCCGGGCACCGA	GTGGAAAGGACGAAACACCG	GTTTAAGAGCTATGCTGGAAACAGCATA	GTGGAAAGGACGAAACACCGAACTTGTGTCCGGGCACCGAGTTTAAGAGCTATGCTGGAAACAGCATA
IRF2BP1_1755.209	CTTGATGAACTCCCGGGAGC	GTGGAAAGGACGAAACACCG	GTTTAAGAGCTATGCTGGAAACAGCATA	GTGGAAAGGACGAAACACCGCTTGATGAACTCCCGGGAGCGTTTAAGAGCTATGCTGGAAACAGCATA
IRF2BP1_1755.175	CCGGGAGTTCATCAAGGCGC	GTGGAAAGGACGAAACACCG	GTTTAAGAGCTATGCTGGAAACAGCATA	GTGGAAAGGACGAAACACCGCCGGGAGTTCATCAAGGCGCGTTTAAGAGCTATGCTGGAAACAGCATA
IRF2BP1_1755.206	GGCAGTACACCTCCCCGGCC	GTGGAAAGGACGAAACACCG	GTTTAAGAGCTATGCTGGAAACAGCATA	GTGGAAAGGACGAAACACCGGGCAGTACACCTCCCCGGCCGTTTAAGAGCTATGCTGGAAACAGCATA
IRF2BP1_1755.203	GCGGGCACTTGTCTCCGCTC	GTGGAAAGGACGAAACACCG	GTTTAAGAGCTATGCTGGAAACAGCATA	GTGGAAAGGACGAAACACCGGCGGGCACTTGTCTCCGCTCGTTTAAGAGCTATGCTGGAAACAGCATA
IRF2BPL_2391.536	ACAGGTAGCAAGATTGTCTC	GTGGAAAGGACGAAACACCG	GTTTAAGAGCTATGCTGGAAACAGCATA	GTGGAAAGGACGAAACACCGACAGGTAGCAAGATTGTCTCGTTTAAGAGCTATGCTGGAAACAGCATA
IRF2BPL_2391.527	TTGACGCAACCGCGGCATAC	GTGGAAAGGACGAAACACCG	GTTTAAGAGCTATGCTGGAAACAGCATA	GTGGAAAGGACGAAACACCGTTGACGCAACCGCGGCATACGTTTAAGAGCTATGCTGGAAACAGCATA
IRF2BPL_2391.214	CACCATTTGCCACGAACGTT	GTGGAAAGGACGAAACACCG	GTTTAAGAGCTATGCTGGAAACAGCATA	GTGGAAAGGACGAAACACCGCACCATTTGCCACGAACGTTGTTTAAGAGCTATGCTGGAAACAGCATA
IRF2BPL_2391.256	GCGTATCCTCCAAACGTTCG	GTGGAAAGGACGAAACACCG	GTTTAAGAGCTATGCTGGAAACAGCATA	GTGGAAAGGACGAAACACCGGCGTATCCTCCAAACGTTCGGTTTAAGAGCTATGCTGGAAACAGCATA
IRF2BPL_2391.255	ATTTGTGGCTGGGGACGGAA	GTGGAAAGGACGAAACACCG	GTTTAAGAGCTATGCTGGAAACAGCATA	GTGGAAAGGACGAAACACCGATTTGTGGCTGGGGACGGAAGTTTAAGAGCTATGCTGGAAACAGCATA
IRF2BPL_2391.248	TGATACTCTCTCTAGAGCAA	GTGGAAAGGACGAAACACCG	GTTTAAGAGCTATGCTGGAAACAGCATA	GTGGAAAGGACGAAACACCGTGATACTCTCTCTAGAGCAAGTTTAAGAGCTATGCTGGAAACAGCATA
IRF2BPL_2391.246	CACCTCGCCGGTGGCCCCCT	GTGGAAAGGACGAAACACCG	GTTTAAGAGCTATGCTGGAAACAGCATA	GTGGAAAGGACGAAACACCGCACCTCGCCGGTGGCCCCCTGTTTAAGAGCTATGCTGGAAACAGCATA
IRF2BPL_2391.244	GGGGCAATACACCTCGCCGG	GTGGAAAGGACGAAACACCG	GTTTAAGAGCTATGCTGGAAACAGCATA	GTGGAAAGGACGAAACACCGGGGGCAATACACCTCGCCGGGTTTAAGAGCTATGCTGGAAACAGCATA
LNX1_2187.301	GGGGGTCCAGCAAAGCCTGC	GTGGAAAGGACGAAACACCG	GTTTAAGAGCTATGCTGGAAACAGCATA	GTGGAAAGGACGAAACACCGGGGGGTCCAGCAAAGCCTGCGTTTAAGAGCTATGCTGGAAACAGCATA
LNX1_2187.300	GTCCACACGGAGTGTCCAGG	GTGGAAAGGACGAAACACCG	GTTTAAGAGCTATGCTGGAAACAGCATA	GTGGAAAGGACGAAACACCGGTCCACACGGAGTGTCCAGGGTTTAAGAGCTATGCTGGAAACAGCATA
LNX1_2187.298	GTGTCCACACGGAGTGTCCA	GTGGAAAGGACGAAACACCG	GTTTAAGAGCTATGCTGGAAACAGCATA	GTGGAAAGGACGAAACACCGGTGTCCACACGGAGTGTCCAGTTTAAGAGCTATGCTGGAAACAGCATA
LNX1_2187.8	GACCCCCTGGACACTCCGTG	GTGGAAAGGACGAAACACCG	GTTTAAGAGCTATGCTGGAAACAGCATA	GTGGAAAGGACGAAACACCGGACCCCCTGGACACTCCGTGGTTTAAGAGCTATGCTGGAAACAGCATA
LNX1_2187.296	GTGCAGTAGGTGTGTCCACA	GTGGAAAGGACGAAACACCG	GTTTAAGAGCTATGCTGGAAACAGCATA	GTGGAAAGGACGAAACACCGGTGCAGTAGGTGTGTCCACAGTTTAAGAGCTATGCTGGAAACAGCATA
LNX1_2187.9	CCTCTGCCTCACCAACTTCC	GTGGAAAGGACGAAACACCG	GTTTAAGAGCTATGCTGGAAACAGCATA	GTGGAAAGGACGAAACACCGCCTCTGCCTCACCAACTTCCGTTTAAGAGCTATGCTGGAAACAGCATA
LNX1_2187.290	GACAGAAGTCCTTCTCCACC	GTGGAAAGGACGAAACACCG	GTTTAAGAGCTATGCTGGAAACAGCATA	GTGGAAAGGACGAAACACCGGACAGAAGTCCTTCTCCACCGTTTAAGAGCTATGCTGGAAACAGCATA
LNX1_2187.253	GAGTCCACTGGGCTGATTGC	GTGGAAAGGACGAAACACCG	GTTTAAGAGCTATGCTGGAAACAGCATA	GTGGAAAGGACGAAACACCGGAGTCCACTGGGCTGATTGCGTTTAAGAGCTATGCTGGAAACAGCATA
LNX1_2187.35	CTGGCCGGAGCAACCGAACT	GTGGAAAGGACGAAACACCG	GTTTAAGAGCTATGCTGGAAACAGCATA	GTGGAAAGGACGAAACACCGCTGGCCGGAGCAACCGAACTGTTTAAGAGCTATGCTGGAAACAGCATA
LNX1_2187.57	GGGTGATCGCCAGAGACGGC	GTGGAAAGGACGAAACACCG	GTTTAAGAGCTATGCTGGAAACAGCATA	GTGGAAAGGACGAAACACCGGGGTGATCGCCAGAGACGGCGTTTAAGAGCTATGCTGGAAACAGCATA
LNX1_2187.82	GGCGGTGTGGCATATCGACA	GTGGAAAGGACGAAACACCG	GTTTAAGAGCTATGCTGGAAACAGCATA	GTGGAAAGGACGAAACACCGGGCGGTGTGGCATATCGACAGTTTAAGAGCTATGCTGGAAACAGCATA
LNX1_2187.109	CTCGGCATGACCGTCGCAGG	GTGGAAAGGACGAAACACCG	GTTTAAGAGCTATGCTGGAAACAGCATA	GTGGAAAGGACGAAACACCGCTCGGCATGACCGTCGCAGGGTTTAAGAGCTATGCTGGAAACAGCATA
LNX2_2073.236	GCAGAGGTTGAAGGCAAATA	GTGGAAAGGACGAAACACCG	GTTTAAGAGCTATGCTGGAAACAGCATA	GTGGAAAGGACGAAACACCGGCAGAGGTTGAAGGCAAATAGTTTAAGAGCTATGCTGGAAACAGCATA
LNX2_2073.233	TGTCCACAGGGTGTGTCTAG	GTGGAAAGGACGAAACACCG	GTTTAAGAGCTATGCTGGAAACAGCATA	GTGGAAAGGACGAAACACCGTGTCCACAGGGTGTGTCTAGGTTTAAGAGCTATGCTGGAAACAGCATA
LNX2_2073.231	GTAGCAGAATGTATGTCCAC	GTGGAAAGGACGAAACACCG	GTTTAAGAGCTATGCTGGAAACAGCATA	GTGGAAAGGACGAAACACCGGTAGCAGAATGTATGTCCACGTTTAAGAGCTATGCTGGAAACAGCATA
LNX2_2073.6	AGAGAAAGATTTCTGTCCGT	GTGGAAAGGACGAAACACCG	GTTTAAGAGCTATGCTGGAAACAGCATA	GTGGAAAGGACGAAACACCGAGAGAAAGATTTCTGTCCGTGTTTAAGAGCTATGCTGGAAACAGCATA
LNX2_2073.7	AAGATTTCTGTCCGTTGGAC	GTGGAAAGGACGAAACACCG	GTTTAAGAGCTATGCTGGAAACAGCATA	GTGGAAAGGACGAAACACCGAAGATTTCTGTCCGTTGGACGTTTAAGAGCTATGCTGGAAACAGCATA
LNX2_2073.38	ATCCAGGAGGTCTATCGGGA	GTGGAAAGGACGAAACACCG	GTTTAAGAGCTATGCTGGAAACAGCATA	GTGGAAAGGACGAAACACCGATCCAGGAGGTCTATCGGGAGTTTAAGAGCTATGCTGGAAACAGCATA
LNX2_2073.200	GACAGCTCGGGCATAGTTAT	GTGGAAAGGACGAAACACCG	GTTTAAGAGCTATGCTGGAAACAGCATA	GTGGAAAGGACGAAACACCGGACAGCTCGGGCATAGTTATGTTTAAGAGCTATGCTGGAAACAGCATA
LNX2_2073.186	CAGCCAACCCCCCTTCCAAC	GTGGAAAGGACGAAACACCG	GTTTAAGAGCTATGCTGGAAACAGCATA	GTGGAAAGGACGAAACACCGCAGCCAACCCCCCTTCCAACGTTTAAGAGCTATGCTGGAAACAGCATA
LNX2_2073.81	TCCCTTGGCATGACCGTTGC	GTGGAAAGGACGAAACACCG	GTTTAAGAGCTATGCTGGAAACAGCATA	GTGGAAAGGACGAAACACCGTCCCTTGGCATGACCGTTGCGTTTAAGAGCTATGCTGGAAACAGCATA
LNX2_2073.89	GTGACCAGTGTGCCACCCCA	GTGGAAAGGACGAAACACCG	GTTTAAGAGCTATGCTGGAAACAGCATA	GTGGAAAGGACGAAACACCGGTGACCAGTGTGCCACCCCAGTTTAAGAGCTATGCTGGAAACAGCATA
LNX2_2073.130	CACGGTTGACAGCCCATTTA	GTGGAAAGGACGAAACACCG	GTTTAAGAGCTATGCTGGAAACAGCATA	GTGGAAAGGACGAAACACCGCACGGTTGACAGCCCATTTAGTTTAAGAGCTATGCTGGAAACAGCATA
LONRF1_2322.33	GCGCTGGGCGGCCACCTGAA	GTGGAAAGGACGAAACACCG	GTTTAAGAGCTATGCTGGAAACAGCATA	GTGGAAAGGACGAAACACCGGCGCTGGGCGGCCACCTGAAGTTTAAGAGCTATGCTGGAAACAGCATA
LONRF1_2322.96	TACTGCACCAGGGGCGCTAC	GTGGAAAGGACGAAACACCG	GTTTAAGAGCTATGCTGGAAACAGCATA	GTGGAAAGGACGAAACACCGTACTGCACCAGGGGCGCTACGTTTAAGAGCTATGCTGGAAACAGCATA
LONRF1_2322.192	TGTCCGCAAGGGGTTGTTAC	GTGGAAAGGACGAAACACCG	GTTTAAGAGCTATGCTGGAAACAGCATA	GTGGAAAGGACGAAACACCGTGTCCGCAAGGGGTTGTTACGTTTAAGAGCTATGCTGGAAACAGCATA
LONRF1_2322.191	ACAGAACGAATGTCCGCAAG	GTGGAAAGGACGAAACACCG	GTTTAAGAGCTATGCTGGAAACAGCATA	GTGGAAAGGACGAAACACCGACAGAACGAATGTCCGCAAGGTTTAAGAGCTATGCTGGAAACAGCATA
LONRF1_2322.190	TACAGAACGAATGTCCGCAA	GTGGAAAGGACGAAACACCG	GTTTAAGAGCTATGCTGGAAACAGCATA	GTGGAAAGGACGAAACACCGTACAGAACGAATGTCCGCAAGTTTAAGAGCTATGCTGGAAACAGCATA
LONRF1_2322.189	TTACAGAACGAATGTCCGCA	GTGGAAAGGACGAAACACCG	GTTTAAGAGCTATGCTGGAAACAGCATA	GTGGAAAGGACGAAACACCGTTACAGAACGAATGTCCGCAGTTTAAGAGCTATGCTGGAAACAGCATA
LONRF1_2322.131	AACGTGCATTTCTTACCGGA	GTGGAAAGGACGAAACACCG	GTTTAAGAGCTATGCTGGAAACAGCATA	GTGGAAAGGACGAAACACCGAACGTGCATTTCTTACCGGAGTTTAAGAGCTATGCTGGAAACAGCATA
LONRF1_2322.141	CACTGCCGACATTGAATATC	GTGGAAAGGACGAAACACCG	GTTTAAGAGCTATGCTGGAAACAGCATA	GTGGAAAGGACGAAACACCGCACTGCCGACATTGAATATCGTTTAAGAGCTATGCTGGAAACAGCATA
LONRF1_2322.148	CGGATCAATGCCCGAGAGGG	GTGGAAAGGACGAAACACCG	GTTTAAGAGCTATGCTGGAAACAGCATA	GTGGAAAGGACGAAACACCGCGGATCAATGCCCGAGAGGGGTTTAAGAGCTATGCTGGAAACAGCATA
LONRF2_2265.8	CCGCGCGGGCGACTACGAGA	GTGGAAAGGACGAAACACCG	GTTTAAGAGCTATGCTGGAAACAGCATA	GTGGAAAGGACGAAACACCGCCGCGCGGGCGACTACGAGAGTTTAAGAGCTATGCTGGAAACAGCATA
LONRF2_2265.306	ACGCGCCCAGGGCTTCGGGG	GTGGAAAGGACGAAACACCG	GTTTAAGAGCTATGCTGGAAACAGCATA	GTGGAAAGGACGAAACACCGACGCGCCCAGGGCTTCGGGGGTTTAAGAGCTATGCTGGAAACAGCATA
LONRF2_2265.53	TGCTCGGCTGCCCGCGCTGC	GTGGAAAGGACGAAACACCG	GTTTAAGAGCTATGCTGGAAACAGCATA	GTGGAAAGGACGAAACACCGTGCTCGGCTGCCCGCGCTGCGTTTAAGAGCTATGCTGGAAACAGCATA
LONRF2_2265.273	TGCAGCAGCCGCCGGCAGCG	GTGGAAAGGACGAAACACCG	GTTTAAGAGCTATGCTGGAAACAGCATA	GTGGAAAGGACGAAACACCGTGCAGCAGCCGCCGGCAGCGGTTTAAGAGCTATGCTGGAAACAGCATA
LONRF2_2265.55	CCGGCGGCTGCTGCATAAGC	GTGGAAAGGACGAAACACCG	GTTTAAGAGCTATGCTGGAAACAGCATA	GTGGAAAGGACGAAACACCGCCGGCGGCTGCTGCATAAGCGTTTAAGAGCTATGCTGGAAACAGCATA
LONRF2_2265.82	TTCATTATTGCTGCTGCGGG	GTGGAAAGGACGAAACACCG	GTTTAAGAGCTATGCTGGAAACAGCATA	GTGGAAAGGACGAAACACCGTTCATTATTGCTGCTGCGGGGTTTAAGAGCTATGCTGGAAACAGCATA
LONRF2_2265.222	TGTCCACAGGGCGTAGTGAC	GTGGAAAGGACGAAACACCG	GTTTAAGAGCTATGCTGGAAACAGCATA	GTGGAAAGGACGAAACACCGTGTCCACAGGGCGTAGTGACGTTTAAGAGCTATGCTGGAAACAGCATA
LONRF2_2265.115	GAACCTGTCACTACGCCCTG	GTGGAAAGGACGAAACACCG	GTTTAAGAGCTATGCTGGAAACAGCATA	GTGGAAAGGACGAAACACCGGAACCTGTCACTACGCCCTGGTTTAAGAGCTATGCTGGAAACAGCATA
LONRF2_2265.220	TAGGCAAAATGTGTGTCCAC	GTGGAAAGGACGAAACACCG	GTTTAAGAGCTATGCTGGAAACAGCATA	GTGGAAAGGACGAAACACCGTAGGCAAAATGTGTGTCCACGTTTAAGAGCTATGCTGGAAACAGCATA
LONRF2_2265.219	GGCAGCGCTCAAGGCATTTT	GTGGAAAGGACGAAACACCG	GTTTAAGAGCTATGCTGGAAACAGCATA	GTGGAAAGGACGAAACACCGGGCAGCGCTCAAGGCATTTTGTTTAAGAGCTATGCTGGAAACAGCATA
LONRF2_2265.218	CGTGGTCAAGGCAGCGCTCA	GTGGAAAGGACGAAACACCG	GTTTAAGAGCTATGCTGGAAACAGCATA	GTGGAAAGGACGAAACACCGCGTGGTCAAGGCAGCGCTCAGTTTAAGAGCTATGCTGGAAACAGCATA
LONRF2_2265.214	CTTTGCACAAAGGACAGTGT	GTGGAAAGGACGAAACACCG	GTTTAAGAGCTATGCTGGAAACAGCATA	GTGGAAAGGACGAAACACCGCTTTGCACAAAGGACAGTGTGTTTAAGAGCTATGCTGGAAACAGCATA
LONRF2_2265.196	CTTATCATAAGCCGATAGCG	GTGGAAAGGACGAAACACCG	GTTTAAGAGCTATGCTGGAAACAGCATA	GTGGAAAGGACGAAACACCGCTTATCATAAGCCGATAGCGGTTTAAGAGCTATGCTGGAAACAGCATA
LONRF2_2265.190	TATAGCCATCTCTGTGGCGG	GTGGAAAGGACGAAACACCG	GTTTAAGAGCTATGCTGGAAACAGCATA	GTGGAAAGGACGAAACACCGTATAGCCATCTCTGTGGCGGGTTTAAGAGCTATGCTGGAAACAGCATA
LONRF3_2280.317	GATTCGCCCCCGGGACGCCA	GTGGAAAGGACGAAACACCG	GTTTAAGAGCTATGCTGGAAACAGCATA	GTGGAAAGGACGAAACACCGGATTCGCCCCCGGGACGCCAGTTTAAGAGCTATGCTGGAAACAGCATA
LONRF3_2280.57	TTTAAGTGCCGGAAATGTCA	GTGGAAAGGACGAAACACCG	GTTTAAGAGCTATGCTGGAAACAGCATA	GTGGAAAGGACGAAACACCGTTTAAGTGCCGGAAATGTCAGTTTAAGAGCTATGCTGGAAACAGCATA
LONRF3_2280.296	GGCCACACGACAAGGACACG	GTGGAAAGGACGAAACACCG	GTTTAAGAGCTATGCTGGAAACAGCATA	GTGGAAAGGACGAAACACCGGGCCACACGACAAGGACACGGTTTAAGAGCTATGCTGGAAACAGCATA
LONRF3_2280.59	GACCCCGTGTCCTTGTCGTG	GTGGAAAGGACGAAACACCG	GTTTAAGAGCTATGCTGGAAACAGCATA	GTGGAAAGGACGAAACACCGGACCCCGTGTCCTTGTCGTGGTTTAAGAGCTATGCTGGAAACAGCATA
LONRF3_2280.293	AAAGGTGTGGCCACACGACA	GTGGAAAGGACGAAACACCG	GTTTAAGAGCTATGCTGGAAACAGCATA	GTGGAAAGGACGAAACACCGAAAGGTGTGGCCACACGACAGTTTAAGAGCTATGCTGGAAACAGCATA
LONRF3_2280.62	GTAAACTGTGCCTGGAACGT	GTGGAAAGGACGAAACACCG	GTTTAAGAGCTATGCTGGAAACAGCATA	GTGGAAAGGACGAAACACCGGTAAACTGTGCCTGGAACGTGTTTAAGAGCTATGCTGGAAACAGCATA
LONRF3_2280.65	AACGTGGGCGGGCCGCCGAC	GTGGAAAGGACGAAACACCG	GTTTAAGAGCTATGCTGGAAACAGCATA	GTGGAAAGGACGAAACACCGAACGTGGGCGGGCCGCCGACGTTTAAGAGCTATGCTGGAAACAGCATA
LONRF3_2280.66	GACCGGCGCTGTGCGCTGTG	GTGGAAAGGACGAAACACCG	GTTTAAGAGCTATGCTGGAAACAGCATA	GTGGAAAGGACGAAACACCGGACCGGCGCTGTGCGCTGTGGTTTAAGAGCTATGCTGGAAACAGCATA
LONRF3_2280.90	GTACCGCGAGCGCCAGGTGG	GTGGAAAGGACGAAACACCG	GTTTAAGAGCTATGCTGGAAACAGCATA	GTGGAAAGGACGAAACACCGGTACCGCGAGCGCCAGGTGGGTTTAAGAGCTATGCTGGAAACAGCATA
LONRF3_2280.260	CACCTTGCCTAGGGTGGCTA	GTGGAAAGGACGAAACACCG	GTTTAAGAGCTATGCTGGAAACAGCATA	GTGGAAAGGACGAAACACCGCACCTTGCCTAGGGTGGCTAGTTTAAGAGCTATGCTGGAAACAGCATA
LONRF3_2280.230	TCATACATAGAGCGCATTCA	GTGGAAAGGACGAAACACCG	GTTTAAGAGCTATGCTGGAAACAGCATA	GTGGAAAGGACGAAACACCGTCATACATAGAGCGCATTCAGTTTAAGAGCTATGCTGGAAACAGCATA
LONRF3_2280.229	TGCCCGCAAGGTGTTGTGAC	GTGGAAAGGACGAAACACCG	GTTTAAGAGCTATGCTGGAAACAGCATA	GTGGAAAGGACGAAACACCGTGCCCGCAAGGTGTTGTGACGTTTAAGAGCTATGCTGGAAACAGCATA
LONRF3_2280.228	AAGCAAAAAGTATGCCCGCA	GTGGAAAGGACGAAACACCG	GTTTAAGAGCTATGCTGGAAACAGCATA	GTGGAAAGGACGAAACACCGAAGCAAAAAGTATGCCCGCAGTTTAAGAGCTATGCTGGAAACAGCATA
LONRF3_2280.226	GACACTTTGCGTTGTGATCT	GTGGAAAGGACGAAACACCG	GTTTAAGAGCTATGCTGGAAACAGCATA	GTGGAAAGGACGAAACACCGGACACTTTGCGTTGTGATCTGTTTAAGAGCTATGCTGGAAACAGCATA
LONRF3_2280.225	GAAAGACCGTCTTTGCACAA	GTGGAAAGGACGAAACACCG	GTTTAAGAGCTATGCTGGAAACAGCATA	GTGGAAAGGACGAAACACCGGAAAGACCGTCTTTGCACAAGTTTAAGAGCTATGCTGGAAACAGCATA
LONRF3_2280.146	ATTCGTAGATGCATTGAGAC	GTGGAAAGGACGAAACACCG	GTTTAAGAGCTATGCTGGAAACAGCATA	GTGGAAAGGACGAAACACCGATTCGTAGATGCATTGAGACGTTTAAGAGCTATGCTGGAAACAGCATA
LONRF3_2280.204	CTGTGTTGTAGCCATCCCGC	GTGGAAAGGACGAAACACCG	GTTTAAGAGCTATGCTGGAAACAGCATA	GTGGAAAGGACGAAACACCGCTGTGTTGTAGCCATCCCGCGTTTAAGAGCTATGCTGGAAACAGCATA
LRSAM1_2172.300	GGGCTGTCAGCTGATTATCG	GTGGAAAGGACGAAACACCG	GTTTAAGAGCTATGCTGGAAACAGCATA	GTGGAAAGGACGAAACACCGGGGCTGTCAGCTGATTATCGGTTTAAGAGCTATGCTGGAAACAGCATA
LRSAM1_2172.23	AAGGAGCTTCCAGACACCGT	GTGGAAAGGACGAAACACCG	GTTTAAGAGCTATGCTGGAAACAGCATA	GTGGAAAGGACGAAACACCGAAGGAGCTTCCAGACACCGTGTTTAAGAGCTATGCTGGAAACAGCATA
LRSAM1_2172.283	CTCGTTTCCACTGATGTTGA	GTGGAAAGGACGAAACACCG	GTTTAAGAGCTATGCTGGAAACAGCATA	GTGGAAAGGACGAAACACCGCTCGTTTCCACTGATGTTGAGTTTAAGAGCTATGCTGGAAACAGCATA
LRSAM1_2172.200	AGGCGGTGGTGCGCAAAGAT	GTGGAAAGGACGAAACACCG	GTTTAAGAGCTATGCTGGAAACAGCATA	GTGGAAAGGACGAAACACCGAGGCGGTGGTGCGCAAAGATGTTTAAGAGCTATGCTGGAAACAGCATA
LRSAM1_2172.189	TCCGGAGGATCTCGTGCTGC	GTGGAAAGGACGAAACACCG	GTTTAAGAGCTATGCTGGAAACAGCATA	GTGGAAAGGACGAAACACCGTCCGGAGGATCTCGTGCTGCGTTTAAGAGCTATGCTGGAAACAGCATA
LRSAM1_2172.179	GAGGCTCCTGGGGGGCCGTA	GTGGAAAGGACGAAACACCG	GTTTAAGAGCTATGCTGGAAACAGCATA	GTGGAAAGGACGAAACACCGGAGGCTCCTGGGGGGCCGTAGTTTAAGAGCTATGCTGGAAACAGCATA
LRSAM1_2172.164	CAGGCACACGACACACTCTG	GTGGAAAGGACGAAACACCG	GTTTAAGAGCTATGCTGGAAACAGCATA	GTGGAAAGGACGAAACACCGCAGGCACACGACACACTCTGGTTTAAGAGCTATGCTGGAAACAGCATA
LRSAM1_2172.144	GTGTGTCGTGTGCCTGGAAC	GTGGAAAGGACGAAACACCG	GTTTAAGAGCTATGCTGGAAACAGCATA	GTGGAAAGGACGAAACACCGGTGTGTCGTGTGCCTGGAACGTTTAAGAGCTATGCTGGAAACAGCATA
LRSAM1_2172.160	AGCAGACGTGGCCACAGTTG	GTGGAAAGGACGAAACACCG	GTTTAAGAGCTATGCTGGAAACAGCATA	GTGGAAAGGACGAAACACCGAGCAGACGTGGCCACAGTTGGTTTAAGAGCTATGCTGGAAACAGCATA
LRSAM1_2172.155	GTCCTGGCGGCACAGCGGGC	GTGGAAAGGACGAAACACCG	GTTTAAGAGCTATGCTGGAAACAGCATA	GTGGAAAGGACGAAACACCGGTCCTGGCGGCACAGCGGGCGTTTAAGAGCTATGCTGGAAACAGCATA
LRSAM1_2172.153	GCGATGTCCTGGCGGCACAG	GTGGAAAGGACGAAACACCG	GTTTAAGAGCTATGCTGGAAACAGCATA	GTGGAAAGGACGAAACACCGGCGATGTCCTGGCGGCACAGGTTTAAGAGCTATGCTGGAAACAGCATA
LRSAM1_2172.151	GGAGGCGCTGGGCGATGTCC	GTGGAAAGGACGAAACACCG	GTTTAAGAGCTATGCTGGAAACAGCATA	GTGGAAAGGACGAAACACCGGGAGGCGCTGGGCGATGTCCGTTTAAGAGCTATGCTGGAAACAGCATA
LTN1_5439.216	TAACGTAGACAAACGTTTTG	GTGGAAAGGACGAAACACCG	GTTTAAGAGCTATGCTGGAAACAGCATA	GTGGAAAGGACGAAACACCGTAACGTAGACAAACGTTTTGGTTTAAGAGCTATGCTGGAAACAGCATA
LTN1_5439.217	AACGTAGACAAACGTTTTGA	GTGGAAAGGACGAAACACCG	GTTTAAGAGCTATGCTGGAAACAGCATA	GTGGAAAGGACGAAACACCGAACGTAGACAAACGTTTTGAGTTTAAGAGCTATGCTGGAAACAGCATA
LTN1_5439.227	TTCTACAGGCTTTTTTGGGA	GTGGAAAGGACGAAACACCG	GTTTAAGAGCTATGCTGGAAACAGCATA	GTGGAAAGGACGAAACACCGTTCTACAGGCTTTTTTGGGAGTTTAAGAGCTATGCTGGAAACAGCATA
LTN1_5439.225	GCATGTTCTACAGGCTTTTT	GTGGAAAGGACGAAACACCG	GTTTAAGAGCTATGCTGGAAACAGCATA	GTGGAAAGGACGAAACACCGGCATGTTCTACAGGCTTTTTGTTTAAGAGCTATGCTGGAAACAGCATA
LTN1_5439.221	CTCACGACACAGTGGACAAG	GTGGAAAGGACGAAACACCG	GTTTAAGAGCTATGCTGGAAACAGCATA	GTGGAAAGGACGAAACACCGCTCACGACACAGTGGACAAGGTTTAAGAGCTATGCTGGAAACAGCATA
LTN1_5439.220	AAAAACGTCTCACGACACAG	GTGGAAAGGACGAAACACCG	GTTTAAGAGCTATGCTGGAAACAGCATA	GTGGAAAGGACGAAACACCGAAAAACGTCTCACGACACAGGTTTAAGAGCTATGCTGGAAACAGCATA
MAP3K1_4539.218	TGTTATCAGGCTCAAGATGT	GTGGAAAGGACGAAACACCG	GTTTAAGAGCTATGCTGGAAACAGCATA	GTGGAAAGGACGAAACACCGTGTTATCAGGCTCAAGATGTGTTTAAGAGCTATGCTGGAAACAGCATA
MAP3K1_4539.280	GTAATTGCTCTTCTCACACG	GTGGAAAGGACGAAACACCG	GTTTAAGAGCTATGCTGGAAACAGCATA	GTGGAAAGGACGAAACACCGGTAATTGCTCTTCTCACACGGTTTAAGAGCTATGCTGGAAACAGCATA
MAP3K1_4539.273	AGTTCCTTTTGATGCCAACC	GTGGAAAGGACGAAACACCG	GTTTAAGAGCTATGCTGGAAACAGCATA	GTGGAAAGGACGAAACACCGAGTTCCTTTTGATGCCAACCGTTTAAGAGCTATGCTGGAAACAGCATA
MAP3K1_4539.251	GTACTAAGAGGTCAACAGTA	GTGGAAAGGACGAAACACCG	GTTTAAGAGCTATGCTGGAAACAGCATA	GTGGAAAGGACGAAACACCGGTACTAAGAGGTCAACAGTAGTTTAAGAGCTATGCTGGAAACAGCATA
MAP3K1_4539.268	GACAAATGTGAAGGGATCGA	GTGGAAAGGACGAAACACCG	GTTTAAGAGCTATGCTGGAAACAGCATA	GTGGAAAGGACGAAACACCGGACAAATGTGAAGGGATCGAGTTTAAGAGCTATGCTGGAAACAGCATA
MAP3K1_4539.265	AGAGCCACATCTCGTAAACC	GTGGAAAGGACGAAACACCG	GTTTAAGAGCTATGCTGGAAACAGCATA	GTGGAAAGGACGAAACACCGAGAGCCACATCTCGTAAACCGTTTAAGAGCTATGCTGGAAACAGCATA
MAP3K1_4539.112	GATGTGTCCTATTTGCTTGT	GTGGAAAGGACGAAACACCG	GTTTAAGAGCTATGCTGGAAACAGCATA	GTGGAAAGGACGAAACACCGGATGTGTCCTATTTGCTTGTGTTTAAGAGCTATGCTGGAAACAGCATA
MAP3K1_4539.427	AGCATGCCCAACAAGCAAAT	GTGGAAAGGACGAAACACCG	GTTTAAGAGCTATGCTGGAAACAGCATA	GTGGAAAGGACGAAACACCGAGCATGCCCAACAAGCAAATGTTTAAGAGCTATGCTGGAAACAGCATA
MAP3K1_4539.114	AGTCTTACAGTGTGTGAAGA	GTGGAAAGGACGAAACACCG	GTTTAAGAGCTATGCTGGAAACAGCATA	GTGGAAAGGACGAAACACCGAGTCTTACAGTGTGTGAAGAGTTTAAGAGCTATGCTGGAAACAGCATA
MAP3K1_4539.115	CAGTGTGTGAAGACGGCTGC	GTGGAAAGGACGAAACACCG	GTTTAAGAGCTATGCTGGAAACAGCATA	GTGGAAAGGACGAAACACCGCAGTGTGTGAAGACGGCTGCGTTTAAGAGCTATGCTGGAAACAGCATA
MAP3K1_4539.423	CTCCACTTAGATCTACAAAG	GTGGAAAGGACGAAACACCG	GTTTAAGAGCTATGCTGGAAACAGCATA	GTGGAAAGGACGAAACACCGCTCCACTTAGATCTACAAAGGTTTAAGAGCTATGCTGGAAACAGCATA
MARCH1_870.96	TCGGGTGTTCGCGTGTTGTT	GTGGAAAGGACGAAACACCG	GTTTAAGAGCTATGCTGGAAACAGCATA	GTGGAAAGGACGAAACACCGTCGGGTGTTCGCGTGTTGTTGTTTAAGAGCTATGCTGGAAACAGCATA
MARCH1_870.90	TCGACTTGCAGATCGCCCTG	GTGGAAAGGACGAAACACCG	GTTTAAGAGCTATGCTGGAAACAGCATA	GTGGAAAGGACGAAACACCGTCGACTTGCAGATCGCCCTGGTTTAAGAGCTATGCTGGAAACAGCATA
MARCH1_870.77	TGCAGCGACAGGGTGTGATG	GTGGAAAGGACGAAACACCG	GTTTAAGAGCTATGCTGGAAACAGCATA	GTGGAAAGGACGAAACACCGTGCAGCGACAGGGTGTGATGGTTTAAGAGCTATGCTGGAAACAGCATA
MARCH1_870.14	ATCACACCCTGTCGCTGCAC	GTGGAAAGGACGAAACACCG	GTTTAAGAGCTATGCTGGAAACAGCATA	GTGGAAAGGACGAAACACCGATCACACCCTGTCGCTGCACGTTTAAGAGCTATGCTGGAAACAGCATA
MARCH1_870.75	CAGTGTCCCAGTGCAGCGAC	GTGGAAAGGACGAAACACCG	GTTTAAGAGCTATGCTGGAAACAGCATA	GTGGAAAGGACGAAACACCGCAGTGTCCCAGTGCAGCGACGTTTAAGAGCTATGCTGGAAACAGCATA
MARCH1_870.71	AGCTCTTTATCCACTGGTGG	GTGGAAAGGACGAAACACCG	GTTTAAGAGCTATGCTGGAAACAGCATA	GTGGAAAGGACGAAACACCGAGCTCTTTATCCACTGGTGGGTTTAAGAGCTATGCTGGAAACAGCATA
MARCH1_870.70	CTGAGCTCTTTATCCACTGG	GTGGAAAGGACGAAACACCG	GTTTAAGAGCTATGCTGGAAACAGCATA	GTGGAAAGGACGAAACACCGCTGAGCTCTTTATCCACTGGGTTTAAGAGCTATGCTGGAAACAGCATA
MARCH1_870.69	TATCTGAGCTCTTTATCCAC	GTGGAAAGGACGAAACACCG	GTTTAAGAGCTATGCTGGAAACAGCATA	GTGGAAAGGACGAAACACCGTATCTGAGCTCTTTATCCACGTTTAAGAGCTATGCTGGAAACAGCATA
MARCH1_870.24	TCGCGATCACCTGTGTGGTT	GTGGAAAGGACGAAACACCG	GTTTAAGAGCTATGCTGGAAACAGCATA	GTGGAAAGGACGAAACACCGTCGCGATCACCTGTGTGGTTGTTTAAGAGCTATGCTGGAAACAGCATA
MARCH1_870.38	TCTATGTTCAGTTGTGGCGC	GTGGAAAGGACGAAACACCG	GTTTAAGAGCTATGCTGGAAACAGCATA	GTGGAAAGGACGAAACACCGTCTATGTTCAGTTGTGGCGCGTTTAAGAGCTATGCTGGAAACAGCATA
MARCH1_870.42	GTAGTGCCTGTACCACAAAC	GTGGAAAGGACGAAACACCG	GTTTAAGAGCTATGCTGGAAACAGCATA	GTGGAAAGGACGAAACACCGGTAGTGCCTGTACCACAAACGTTTAAGAGCTATGCTGGAAACAGCATA
MARCH10_2541.121	TGTCGCATCTGTCAGATAGC	GTGGAAAGGACGAAACACCG	GTTTAAGAGCTATGCTGGAAACAGCATA	GTGGAAAGGACGAAACACCGTGTCGCATCTGTCAGATAGCGTTTAAGAGCTATGCTGGAAACAGCATA
MARCH10_2541.124	CGCATCTGTCAGATAGCCGG	GTGGAAAGGACGAAACACCG	GTTTAAGAGCTATGCTGGAAACAGCATA	GTGGAAAGGACGAAACACCGCGCATCTGTCAGATAGCCGGGTTTAAGAGCTATGCTGGAAACAGCATA
MARCH10_2541.174	GCTCCAGGAGGGGGTTGCTT	GTGGAAAGGACGAAACACCG	GTTTAAGAGCTATGCTGGAAACAGCATA	GTGGAAAGGACGAAACACCGGCTCCAGGAGGGGGTTGCTTGTTTAAGAGCTATGCTGGAAACAGCATA
MARCH10_2541.128	CTGGAGCCTTGCGGCTGTGT	GTGGAAAGGACGAAACACCG	GTTTAAGAGCTATGCTGGAAACAGCATA	GTGGAAAGGACGAAACACCGCTGGAGCCTTGCGGCTGTGTGTTTAAGAGCTATGCTGGAAACAGCATA
MARCH10_2541.167	AGGCTTCCCACACAGCCGCA	GTGGAAAGGACGAAACACCG	GTTTAAGAGCTATGCTGGAAACAGCATA	GTGGAAAGGACGAAACACCGAGGCTTCCCACACAGCCGCAGTTTAAGAGCTATGCTGGAAACAGCATA
MARCH10_2541.129	ATCAAGAGTGCCTGAAAAAG	GTGGAAAGGACGAAACACCG	GTTTAAGAGCTATGCTGGAAACAGCATA	GTGGAAAGGACGAAACACCGATCAAGAGTGCCTGAAAAAGGTTTAAGAGCTATGCTGGAAACAGCATA
MARCH10_2541.163	GCCTTGCTTACACATCTCAC	GTGGAAAGGACGAAACACCG	GTTTAAGAGCTATGCTGGAAACAGCATA	GTGGAAAGGACGAAACACCGGCCTTGCTTACACATCTCACGTTTAAGAGCTATGCTGGAAACAGCATA
MARCH11_1209.142	TGGAAGCAGATCTTGCAGAT	GTGGAAAGGACGAAACACCG	GTTTAAGAGCTATGCTGGAAACAGCATA	GTGGAAAGGACGAAACACCGTGGAAGCAGATCTTGCAGATGTTTAAGAGCTATGCTGGAAACAGCATA
MARCH11_1209.65	CAAGATCTGCTTCCAGGGCG	GTGGAAAGGACGAAACACCG	GTTTAAGAGCTATGCTGGAAACAGCATA	GTGGAAAGGACGAAACACCGCAAGATCTGCTTCCAGGGCGGTTTAAGAGCTATGCTGGAAACAGCATA
MARCH11_1209.139	CTGACCCATCACATCGGCAG	GTGGAAAGGACGAAACACCG	GTTTAAGAGCTATGCTGGAAACAGCATA	GTGGAAAGGACGAAACACCGCTGACCCATCACATCGGCAGGTTTAAGAGCTATGCTGGAAACAGCATA
MARCH11_1209.137	AACTGACCCATCACATCGGC	GTGGAAAGGACGAAACACCG	GTTTAAGAGCTATGCTGGAAACAGCATA	GTGGAAAGGACGAAACACCGAACTGACCCATCACATCGGCGTTTAAGAGCTATGCTGGAAACAGCATA
MARCH11_1209.70	GCCGATGTGATGGGTCAGTT	GTGGAAAGGACGAAACACCG	GTTTAAGAGCTATGCTGGAAACAGCATA	GTGGAAAGGACGAAACACCGGCCGATGTGATGGGTCAGTTGTTTAAGAGCTATGCTGGAAACAGCATA
MARCH11_1209.71	ATCAGCTGTGCCTGCTAAAA	GTGGAAAGGACGAAACACCG	GTTTAAGAGCTATGCTGGAAACAGCATA	GTGGAAAGGACGAAACACCGATCAGCTGTGCCTGCTAAAAGTTTAAGAGCTATGCTGGAAACAGCATA
MARCH11_1209.125	CCAGAGGAGCCAAGTCACAC	GTGGAAAGGACGAAACACCG	GTTTAAGAGCTATGCTGGAAACAGCATA	GTGGAAAGGACGAAACACCGCCAGAGGAGCCAAGTCACACGTTTAAGAGCTATGCTGGAAACAGCATA
MARCH2_741.121	TCATGGCAGATCCGGCAGAA	GTGGAAAGGACGAAACACCG	GTTTAAGAGCTATGCTGGAAACAGCATA	GTGGAAAGGACGAAACACCGTCATGGCAGATCCGGCAGAAGTTTAAGAGCTATGCTGGAAACAGCATA
MARCH2_741.119	ACTCCCCGTTCGCTCCCTCA	GTGGAAAGGACGAAACACCG	GTTTAAGAGCTATGCTGGAAACAGCATA	GTGGAAAGGACGAAACACCGACTCCCCGTTCGCTCCCTCAGTTTAAGAGCTATGCTGGAAACAGCATA
MARCH2_741.118	CGTGCCGGTGCAGCCACACG	GTGGAAAGGACGAAACACCG	GTTTAAGAGCTATGCTGGAAACAGCATA	GTGGAAAGGACGAAACACCGCGTGCCGGTGCAGCCACACGGTTTAAGAGCTATGCTGGAAACAGCATA
MARCH2_741.24	GTGTGGCTGCACCGGCACGC	GTGGAAAGGACGAAACACCG	GTTTAAGAGCTATGCTGGAAACAGCATA	GTGGAAAGGACGAAACACCGGTGTGGCTGCACCGGCACGCGTTTAAGAGCTATGCTGGAAACAGCATA
MARCH2_741.114	CTCCAGACAGCTCTTATGCA	GTGGAAAGGACGAAACACCG	GTTTAAGAGCTATGCTGGAAACAGCATA	GTGGAAAGGACGAAACACCGCTCCAGACAGCTCTTATGCAGTTTAAGAGCTATGCTGGAAACAGCATA
MARCH2_741.26	TGCCGTGCATAAGAGCTGTC	GTGGAAAGGACGAAACACCG	GTTTAAGAGCTATGCTGGAAACAGCATA	GTGGAAAGGACGAAACACCGTGCCGTGCATAAGAGCTGTCGTTTAAGAGCTATGCTGGAAACAGCATA
MARCH2_741.112	GTGGCACAGCTCGCAGTAGC	GTGGAAAGGACGAAACACCG	GTTTAAGAGCTATGCTGGAAACAGCATA	GTGGAAAGGACGAAACACCGGTGGCACAGCTCGCAGTAGCGTTTAAGAGCTATGCTGGAAACAGCATA
MARCH2_741.41	ACACCGCTGGCCGCCATCTC	GTGGAAAGGACGAAACACCG	GTTTAAGAGCTATGCTGGAAACAGCATA	GTGGAAAGGACGAAACACCGACACCGCTGGCCGCCATCTCGTTTAAGAGCTATGCTGGAAACAGCATA
MARCH2_741.80	TTCTCCACTCGGAGTACAGC	GTGGAAAGGACGAAACACCG	GTTTAAGAGCTATGCTGGAAACAGCATA	GTGGAAAGGACGAAACACCGTTCTCCACTCGGAGTACAGCGTTTAAGAGCTATGCTGGAAACAGCATA
MARCH3_762.13	GATGTGCAGGATCTGCCACG	GTGGAAAGGACGAAACACCG	GTTTAAGAGCTATGCTGGAAACAGCATA	GTGGAAAGGACGAAACACCGGATGTGCAGGATCTGCCACGGTTTAAGAGCTATGCTGGAAACAGCATA
MARCH3_762.90	ATGGAGAGAGCAAGTCCTCT	GTGGAAAGGACGAAACACCG	GTTTAAGAGCTATGCTGGAAACAGCATA	GTGGAAAGGACGAAACACCGATGGAGAGAGCAAGTCCTCTGTTTAAGAGCTATGCTGGAAACAGCATA
MARCH3_762.19	TGTGAATGTACAGGGACCTT	GTGGAAAGGACGAAACACCG	GTTTAAGAGCTATGCTGGAAACAGCATA	GTGGAAAGGACGAAACACCGTGTGAATGTACAGGGACCTTGTTTAAGAGCTATGCTGGAAACAGCATA
MARCH3_762.20	GTGAATGTACAGGGACCTTG	GTGGAAAGGACGAAACACCG	GTTTAAGAGCTATGCTGGAAACAGCATA	GTGGAAAGGACGAAACACCGGTGAATGTACAGGGACCTTGGTTTAAGAGCTATGCTGGAAACAGCATA
MARCH3_762.21	GGACCTTGGGGACAATTCAT	GTGGAAAGGACGAAACACCG	GTTTAAGAGCTATGCTGGAAACAGCATA	GTGGAAAGGACGAAACACCGGGACCTTGGGGACAATTCATGTTTAAGAGCTATGCTGGAAACAGCATA
MARCH3_762.22	GACAATTCATCGGAGCTGCC	GTGGAAAGGACGAAACACCG	GTTTAAGAGCTATGCTGGAAACAGCATA	GTGGAAAGGACGAAACACCGGACAATTCATCGGAGCTGCCGTTTAAGAGCTATGCTGGAAACAGCATA
MARCH3_762.86	TTCACAGTAGCTGGTGTTTG	GTGGAAAGGACGAAACACCG	GTTTAAGAGCTATGCTGGAAACAGCATA	GTGGAAAGGACGAAACACCGTTCACAGTAGCTGGTGTTTGGTTTAAGAGCTATGCTGGAAACAGCATA
MARCH3_762.31	GCGGACTCTGTTTGGCGACA	GTGGAAAGGACGAAACACCG	GTTTAAGAGCTATGCTGGAAACAGCATA	GTGGAAAGGACGAAACACCGGCGGACTCTGTTTGGCGACAGTTTAAGAGCTATGCTGGAAACAGCATA
MARCH3_762.72	GCCAGCCCGAGATGGTGGCC	GTGGAAAGGACGAAACACCG	GTTTAAGAGCTATGCTGGAAACAGCATA	GTGGAAAGGACGAAACACCGGCCAGCCCGAGATGGTGGCCGTTTAAGAGCTATGCTGGAAACAGCATA
MARCH4_1233.49	TCTGCCGCATCTGCTTCCAG	GTGGAAAGGACGAAACACCG	GTTTAAGAGCTATGCTGGAAACAGCATA	GTGGAAAGGACGAAACACCGTCTGCCGCATCTGCTTCCAGGTTTAAGAGCTATGCTGGAAACAGCATA
MARCH4_1233.247	ACCACCAGAGCAGCCCACAC	GTGGAAAGGACGAAACACCG	GTTTAAGAGCTATGCTGGAAACAGCATA	GTGGAAAGGACGAAACACCGACCACCAGAGCAGCCCACACGTTTAAGAGCTATGCTGGAAACAGCATA
MARCH4_1233.179	TGGAAGCAGATGCGGCAGAG	GTGGAAAGGACGAAACACCG	GTTTAAGAGCTATGCTGGAAACAGCATA	GTGGAAAGGACGAAACACCGTGGAAGCAGATGCGGCAGAGGTTTAAGAGCTATGCTGGAAACAGCATA
MARCH4_1233.175	CCGAGCCATCACAGCGGCAT	GTGGAAAGGACGAAACACCG	GTTTAAGAGCTATGCTGGAAACAGCATA	GTGGAAAGGACGAAACACCGCCGAGCCATCACAGCGGCATGTTTAAGAGCTATGCTGGAAACAGCATA
MARCH4_1233.54	CTGAGCCCATGCCGCTGTGA	GTGGAAAGGACGAAACACCG	GTTTAAGAGCTATGCTGGAAACAGCATA	GTGGAAAGGACGAAACACCGCTGAGCCCATGCCGCTGTGAGTTTAAGAGCTATGCTGGAAACAGCATA
MARCH4_1233.55	CCCATGCCGCTGTGATGGCT	GTGGAAAGGACGAAACACCG	GTTTAAGAGCTATGCTGGAAACAGCATA	GTGGAAAGGACGAAACACCGCCCATGCCGCTGTGATGGCTGTTTAAGAGCTATGCTGGAAACAGCATA
MARCH4_1233.173	ACTTGACCGAGCCATCACAG	GTGGAAAGGACGAAACACCG	GTTTAAGAGCTATGCTGGAAACAGCATA	GTGGAAAGGACGAAACACCGACTTGACCGAGCCATCACAGGTTTAAGAGCTATGCTGGAAACAGCATA
MARCH4_1233.170	GCTCGCTGATCCACTTGATG	GTGGAAAGGACGAAACACCG	GTTTAAGAGCTATGCTGGAAACAGCATA	GTGGAAAGGACGAAACACCGGCTCGCTGATCCACTTGATGGTTTAAGAGCTATGCTGGAAACAGCATA
MARCH4_1233.58	CATCAAGTGGATCAGCGAGC	GTGGAAAGGACGAAACACCG	GTTTAAGAGCTATGCTGGAAACAGCATA	GTGGAAAGGACGAAACACCGCATCAAGTGGATCAGCGAGCGTTTAAGAGCTATGCTGGAAACAGCATA
MARCH4_1233.59	ATCAAGTGGATCAGCGAGCG	GTGGAAAGGACGAAACACCG	GTTTAAGAGCTATGCTGGAAACAGCATA	GTGGAAAGGACGAAACACCGATCAAGTGGATCAGCGAGCGGTTTAAGAGCTATGCTGGAAACAGCATA
MARCH4_1233.67	CAGGTTGCAGCCGCCATCCT	GTGGAAAGGACGAAACACCG	GTTTAAGAGCTATGCTGGAAACAGCATA	GTGGAAAGGACGAAACACCGCAGGTTGCAGCCGCCATCCTGTTTAAGAGCTATGCTGGAAACAGCATA
MARCH4_1233.160	GCCAAGAAATACTGGCGATG	GTGGAAAGGACGAAACACCG	GTTTAAGAGCTATGCTGGAAACAGCATA	GTGGAAAGGACGAAACACCGGCCAAGAAATACTGGCGATGGTTTAAGAGCTATGCTGGAAACAGCATA
MARCH4_1233.153	CATACATCCCGTAGCAGATC	GTGGAAAGGACGAAACACCG	GTTTAAGAGCTATGCTGGAAACAGCATA	GTGGAAAGGACGAAACACCGCATACATCCCGTAGCAGATCGTTTAAGAGCTATGCTGGAAACAGCATA
MARCH5_837.4	AGATGATAGAACAGCTGAAT	GTGGAAAGGACGAAACACCG	GTTTAAGAGCTATGCTGGAAACAGCATA	GTGGAAAGGACGAAACACCGAGATGATAGAACAGCTGAATGTTTAAGAGCTATGCTGGAAACAGCATA
MARCH5_837.5	CTGAATGGGTGAGACCATGC	GTGGAAAGGACGAAACACCG	GTTTAAGAGCTATGCTGGAAACAGCATA	GTGGAAAGGACGAAACACCGCTGAATGGGTGAGACCATGCGTTTAAGAGCTATGCTGGAAACAGCATA
MARCH5_837.7	GGTGCAGAGGATCTACAAAA	GTGGAAAGGACGAAACACCG	GTTTAAGAGCTATGCTGGAAACAGCATA	GTGGAAAGGACGAAACACCGGGTGCAGAGGATCTACAAAAGTTTAAGAGCTATGCTGGAAACAGCATA
MARCH5_837.70	CCCAGCGTTGTAGACAGGCC	GTGGAAAGGACGAAACACCG	GTTTAAGAGCTATGCTGGAAACAGCATA	GTGGAAAGGACGAAACACCGCCCAGCGTTGTAGACAGGCCGTTTAAGAGCTATGCTGGAAACAGCATA
MARCH5_837.69	ATCCACCCAGCGTTGTAGAC	GTGGAAAGGACGAAACACCG	GTTTAAGAGCTATGCTGGAAACAGCATA	GTGGAAAGGACGAAACACCGATCCACCCAGCGTTGTAGACGTTTAAGAGCTATGCTGGAAACAGCATA
MARCH5_837.12	GGCCTGTCTACAACGCTGGG	GTGGAAAGGACGAAACACCG	GTTTAAGAGCTATGCTGGAAACAGCATA	GTGGAAAGGACGAAACACCGGGCCTGTCTACAACGCTGGGGTTTAAGAGCTATGCTGGAAACAGCATA
MARCH5_837.68	GCACTGAGGACATGCCACTC	GTGGAAAGGACGAAACACCG	GTTTAAGAGCTATGCTGGAAACAGCATA	GTGGAAAGGACGAAACACCGGCACTGAGGACATGCCACTCGTTTAAGAGCTATGCTGGAAACAGCATA
MARCH5_837.22	TAATGGTCGGCTCTATCTAT	GTGGAAAGGACGAAACACCG	GTTTAAGAGCTATGCTGGAAACAGCATA	GTGGAAAGGACGAAACACCGTAATGGTCGGCTCTATCTATGTTTAAGAGCTATGCTGGAAACAGCATA
MARCH5_837.31	TATTAGGCAAGATGATTCGC	GTGGAAAGGACGAAACACCG	GTTTAAGAGCTATGCTGGAAACAGCATA	GTGGAAAGGACGAAACACCGTATTAGGCAAGATGATTCGCGTTTAAGAGCTATGCTGGAAACAGCATA
MARCH6_2733.1	TGTAGAGTGTGTCGGTCAGA	GTGGAAAGGACGAAACACCG	GTTTAAGAGCTATGCTGGAAACAGCATA	GTGGAAAGGACGAAACACCGTGTAGAGTGTGTCGGTCAGAGTTTAAGAGCTATGCTGGAAACAGCATA
MARCH6_2733.302	GGATGATAAAGCGGTTTCTC	GTGGAAAGGACGAAACACCG	GTTTAAGAGCTATGCTGGAAACAGCATA	GTGGAAAGGACGAAACACCGGGATGATAAAGCGGTTTCTCGTTTAAGAGCTATGCTGGAAACAGCATA
MARCH6_2733.2	TATCATCCTTGTGTATGTAC	GTGGAAAGGACGAAACACCG	GTTTAAGAGCTATGCTGGAAACAGCATA	GTGGAAAGGACGAAACACCGTATCATCCTTGTGTATGTACGTTTAAGAGCTATGCTGGAAACAGCATA
MARCH6_2733.300	ATACTGCCAGTACATACACA	GTGGAAAGGACGAAACACCG	GTTTAAGAGCTATGCTGGAAACAGCATA	GTGGAAAGGACGAAACACCGATACTGCCAGTACATACACAGTTTAAGAGCTATGCTGGAAACAGCATA
MARCH6_2733.11	ACTTGTGGCCTTTGCATGGT	GTGGAAAGGACGAAACACCG	GTTTAAGAGCTATGCTGGAAACAGCATA	GTGGAAAGGACGAAACACCGACTTGTGGCCTTTGCATGGTGTTTAAGAGCTATGCTGGAAACAGCATA
MARCH6_2733.86	GTACTACCATGTTTCTGCAT	GTGGAAAGGACGAAACACCG	GTTTAAGAGCTATGCTGGAAACAGCATA	GTGGAAAGGACGAAACACCGGTACTACCATGTTTCTGCATGTTTAAGAGCTATGCTGGAAACAGCATA
MARCH6_2733.243	ACACTCTTAATTATACGTAT	GTGGAAAGGACGAAACACCG	GTTTAAGAGCTATGCTGGAAACAGCATA	GTGGAAAGGACGAAACACCGACACTCTTAATTATACGTATGTTTAAGAGCTATGCTGGAAACAGCATA
MARCH6_2733.133	GCTAACCATAAGGGCTGTGA	GTGGAAAGGACGAAACACCG	GTTTAAGAGCTATGCTGGAAACAGCATA	GTGGAAAGGACGAAACACCGGCTAACCATAAGGGCTGTGAGTTTAAGAGCTATGCTGGAAACAGCATA
MARCH6_2733.157	CATTGCAGCTATAACATTGA	GTGGAAAGGACGAAACACCG	GTTTAAGAGCTATGCTGGAAACAGCATA	GTGGAAAGGACGAAACACCGCATTGCAGCTATAACATTGAGTTTAAGAGCTATGCTGGAAACAGCATA
MARCH6_2733.191	CTATGACATAAGGTACACAC	GTGGAAAGGACGAAACACCG	GTTTAAGAGCTATGCTGGAAACAGCATA	GTGGAAAGGACGAAACACCGCTATGACATAAGGTACACACGTTTAAGAGCTATGCTGGAAACAGCATA
MARCH6_2418.79	TACTTCGACCTGGTGTCCTG	GTGGAAAGGACGAAACACCG	GTTTAAGAGCTATGCTGGAAACAGCATA	GTGGAAAGGACGAAACACCGTACTTCGACCTGGTGTCCTGGTTTAAGAGCTATGCTGGAAACAGCATA
MARCH6_2418.230	ACACTCTTAATTATACGTAT	GTGGAAAGGACGAAACACCG	GTTTAAGAGCTATGCTGGAAACAGCATA	GTGGAAAGGACGAAACACCGACACTCTTAATTATACGTATGTTTAAGAGCTATGCTGGAAACAGCATA
MARCH6_2418.95	CGAGCGTGGACTGTGACCGC	GTGGAAAGGACGAAACACCG	GTTTAAGAGCTATGCTGGAAACAGCATA	GTGGAAAGGACGAAACACCGCGAGCGTGGACTGTGACCGCGTTTAAGAGCTATGCTGGAAACAGCATA
MARCH7_2001.64	CTTATGTAGAATTTGTCAAA	GTGGAAAGGACGAAACACCG	GTTTAAGAGCTATGCTGGAAACAGCATA	GTGGAAAGGACGAAACACCGCTTATGTAGAATTTGTCAAAGTTTAAGAGCTATGCTGGAAACAGCATA
MARCH7_2001.65	ATAGAGCCATGCAAGTGCAC	GTGGAAAGGACGAAACACCG	GTTTAAGAGCTATGCTGGAAACAGCATA	GTGGAAAGGACGAAACACCGATAGAGCCATGCAAGTGCACGTTTAAGAGCTATGCTGGAAACAGCATA
MARCH7_2001.91	ACCACTTTTTCATACAGTCT	GTGGAAAGGACGAAACACCG	GTTTAAGAGCTATGCTGGAAACAGCATA	GTGGAAAGGACGAAACACCGACCACTTTTTCATACAGTCTGTTTAAGAGCTATGCTGGAAACAGCATA
MARCH7_2001.67	CTGTATGAAAAAGTGGTTAC	GTGGAAAGGACGAAACACCG	GTTTAAGAGCTATGCTGGAAACAGCATA	GTGGAAAGGACGAAACACCGCTGTATGAAAAAGTGGTTACGTTTAAGAGCTATGCTGGAAACAGCATA
MARCH7_2001.88	CTTCTCTTTACATAGTTCAC	GTGGAAAGGACGAAACACCG	GTTTAAGAGCTATGCTGGAAACAGCATA	GTGGAAAGGACGAAACACCGCTTCTCTTTACATAGTTCACGTTTAAGAGCTATGCTGGAAACAGCATA
MARCH8_876.76	TCTCATCATCTCCTTCACAG	GTGGAAAGGACGAAACACCG	GTTTAAGAGCTATGCTGGAAACAGCATA	GTGGAAAGGACGAAACACCGTCTCATCATCTCCTTCACAGGTTTAAGAGCTATGCTGGAAACAGCATA
MARCH8_876.72	TGCAGTGGCAGGGGGTGATC	GTGGAAAGGACGAAACACCG	GTTTAAGAGCTATGCTGGAAACAGCATA	GTGGAAAGGACGAAACACCGTGCAGTGGCAGGGGGTGATCGTTTAAGAGCTATGCTGGAAACAGCATA
MARCH8_876.14	ATCACCCCCTGCCACTGCAC	GTGGAAAGGACGAAACACCG	GTTTAAGAGCTATGCTGGAAACAGCATA	GTGGAAAGGACGAAACACCGATCACCCCCTGCCACTGCACGTTTAAGAGCTATGCTGGAAACAGCATA
MARCH8_876.66	AGGCCTGGTGCACGAAGTGG	GTGGAAAGGACGAAACACCG	GTTTAAGAGCTATGCTGGAAACAGCATA	GTGGAAAGGACGAAACACCGAGGCCTGGTGCACGAAGTGGGTTTAAGAGCTATGCTGGAAACAGCATA
MARCH8_876.15	AAGCCTCCACTTCGTGCACC	GTGGAAAGGACGAAACACCG	GTTTAAGAGCTATGCTGGAAACAGCATA	GTGGAAAGGACGAAACACCGAAGCCTCCACTTCGTGCACCGTTTAAGAGCTATGCTGGAAACAGCATA
MARCH8_876.63	CTTGATCCACTGCTGCAGGC	GTGGAAAGGACGAAACACCG	GTTTAAGAGCTATGCTGGAAACAGCATA	GTGGAAAGGACGAAACACCGCTTGATCCACTGCTGCAGGCGTTTAAGAGCTATGCTGGAAACAGCATA
MARCH8_876.62	AGCTCTTGATCCACTGCTGC	GTGGAAAGGACGAAACACCG	GTTTAAGAGCTATGCTGGAAACAGCATA	GTGGAAAGGACGAAACACCGAGCTCTTGATCCACTGCTGCGTTTAAGAGCTATGCTGGAAACAGCATA
MARCH8_876.61	GAGCTCGCAGCAGCGCGTGT	GTGGAAAGGACGAAACACCG	GTTTAAGAGCTATGCTGGAAACAGCATA	GTGGAAAGGACGAAACACCGGAGCTCGCAGCAGCGCGTGTGTTTAAGAGCTATGCTGGAAACAGCATA
MARCH8_876.23	GCTCATTGACCGTACTGCTG	GTGGAAAGGACGAAACACCG	GTTTAAGAGCTATGCTGGAAACAGCATA	GTGGAAAGGACGAAACACCGGCTCATTGACCGTACTGCTGGTTTAAGAGCTATGCTGGAAACAGCATA
MARCH8_876.32	GCCCTTTTGGACTAAATTGG	GTGGAAAGGACGAAACACCG	GTTTAAGAGCTATGCTGGAAACAGCATA	GTGGAAAGGACGAAACACCGGCCCTTTTGGACTAAATTGGGTTTAAGAGCTATGCTGGAAACAGCATA
MARCH9_1041.179	TGGAAGCAGATCCGGCACTG	GTGGAAAGGACGAAACACCG	GTTTAAGAGCTATGCTGGAAACAGCATA	GTGGAAAGGACGAAACACCGTGGAAGCAGATCCGGCACTGGTTTAAGAGCTATGCTGGAAACAGCATA
MARCH9_1041.58	TTAAGCCCCTGCCGCTGCGA	GTGGAAAGGACGAAACACCG	GTTTAAGAGCTATGCTGGAAACAGCATA	GTGGAAAGGACGAAACACCGTTAAGCCCCTGCCGCTGCGAGTTTAAGAGCTATGCTGGAAACAGCATA
MARCH9_1041.173	ACTGAGCCGTCGCAGCGGCA	GTGGAAAGGACGAAACACCG	GTTTAAGAGCTATGCTGGAAACAGCATA	GTGGAAAGGACGAAACACCGACTGAGCCGTCGCAGCGGCAGTTTAAGAGCTATGCTGGAAACAGCATA
MARCH9_1041.59	ATCAGCCCTGCCTCATCCGC	GTGGAAAGGACGAAACACCG	GTTTAAGAGCTATGCTGGAAACAGCATA	GTGGAAAGGACGAAACACCGATCAGCCCTGCCTCATCCGCGTTTAAGAGCTATGCTGGAAACAGCATA
MARCH9_1041.168	TCTCGCTGATCCAGCGGATG	GTGGAAAGGACGAAACACCG	GTTTAAGAGCTATGCTGGAAACAGCATA	GTGGAAAGGACGAAACACCGTCTCGCTGATCCAGCGGATGGTTTAAGAGCTATGCTGGAAACAGCATA
MARCH9_1041.60	TCATCCGCTGGATCAGCGAG	GTGGAAAGGACGAAACACCG	GTTTAAGAGCTATGCTGGAAACAGCATA	GTGGAAAGGACGAAACACCGTCATCCGCTGGATCAGCGAGGTTTAAGAGCTATGCTGGAAACAGCATA
MARCH9_1041.62	ATCCGCTGGATCAGCGAGAG	GTGGAAAGGACGAAACACCG	GTTTAAGAGCTATGCTGGAAACAGCATA	GTGGAAAGGACGAAACACCGATCCGCTGGATCAGCGAGAGGTTTAAGAGCTATGCTGGAAACAGCATA
MARCH9_1041.72	AGTTCTGGGCTCGCTCTTCC	GTGGAAAGGACGAAACACCG	GTTTAAGAGCTATGCTGGAAACAGCATA	GTGGAAAGGACGAAACACCGAGTTCTGGGCTCGCTCTTCCGTTTAAGAGCTATGCTGGAAACAGCATA
MDM2_1335.102	ATCGTTTAGTCATAATATAC	GTGGAAAGGACGAAACACCG	GTTTAAGAGCTATGCTGGAAACAGCATA	GTGGAAAGGACGAAACACCGATCGTTTAGTCATAATATACGTTTAAGAGCTATGCTGGAAACAGCATA
MDM2_1335.37	GTTGGGCCCTTCGTGAGAAT	GTGGAAAGGACGAAACACCG	GTTTAAGAGCTATGCTGGAAACAGCATA	GTGGAAAGGACGAAACACCGGTTGGGCCCTTCGTGAGAATGTTTAAGAGCTATGCTGGAAACAGCATA
MDM2_1335.64	CGACCTTGACAAATCACACA	GTGGAAAGGACGAAACACCG	GTTTAAGAGCTATGCTGGAAACAGCATA	GTGGAAAGGACGAAACACCGCGACCTTGACAAATCACACAGTTTAAGAGCTATGCTGGAAACAGCATA
MDM2_1335.51	TGTCAAGGTCGACCTAAAAA	GTGGAAAGGACGAAACACCG	GTTTAAGAGCTATGCTGGAAACAGCATA	GTGGAAAGGACGAAACACCGTGTCAAGGTCGACCTAAAAAGTTTAAGAGCTATGCTGGAAACAGCATA
MDM2_1335.53	TGCATTGTCCATGGCAAAAC	GTGGAAAGGACGAAACACCG	GTTTAAGAGCTATGCTGGAAACAGCATA	GTGGAAAGGACGAAACACCGTGCATTGTCCATGGCAAAACGTTTAAGAGCTATGCTGGAAACAGCATA
MDM2_1335.62	TAAGATGTCCTGTTTTGCCA	GTGGAAAGGACGAAACACCG	GTTTAAGAGCTATGCTGGAAACAGCATA	GTGGAAAGGACGAAACACCGTAAGATGTCCTGTTTTGCCAGTTTAAGAGCTATGCTGGAAACAGCATA
MDM2_1335.61	CTTCTTTGCACATGTAAAGC	GTGGAAAGGACGAAACACCG	GTTTAAGAGCTATGCTGGAAACAGCATA	GTGGAAAGGACGAAACACCGCTTCTTTGCACATGTAAAGCGTTTAAGAGCTATGCTGGAAACAGCATA
MDM2_1335.60	GGTTGTCTACATACTGGGCA	GTGGAAAGGACGAAACACCG	GTTTAAGAGCTATGCTGGAAACAGCATA	GTGGAAAGGACGAAACACCGGGTTGTCTACATACTGGGCAGTTTAAGAGCTATGCTGGAAACAGCATA
MDM2_1335.58	GAATTGGTTGTCTACATACT	GTGGAAAGGACGAAACACCG	GTTTAAGAGCTATGCTGGAAACAGCATA	GTGGAAAGGACGAAACACCGGAATTGGTTGTCTACATACTGTTTAAGAGCTATGCTGGAAACAGCATA
MDM4_1473.8	GAAGCAACTTTATGATCAGC	GTGGAAAGGACGAAACACCG	GTTTAAGAGCTATGCTGGAAACAGCATA	GTGGAAAGGACGAAACACCGGAAGCAACTTTATGATCAGCGTTTAAGAGCTATGCTGGAAACAGCATA
MDM4_1473.35	GTATCAGAGCAGTTAGGTGT	GTGGAAAGGACGAAACACCG	GTTTAAGAGCTATGCTGGAAACAGCATA	GTGGAAAGGACGAAACACCGGTATCAGAGCAGTTAGGTGTGTTTAAGAGCTATGCTGGAAACAGCATA
MDM4_1473.98	CGAAAACAGTACCTCTTGCT	GTGGAAAGGACGAAACACCG	GTTTAAGAGCTATGCTGGAAACAGCATA	GTGGAAAGGACGAAACACCGCGAAAACAGTACCTCTTGCTGTTTAAGAGCTATGCTGGAAACAGCATA
MDM4_1473.59	CAAGAGACCATCTCAAGCAT	GTGGAAAGGACGAAACACCG	GTTTAAGAGCTATGCTGGAAACAGCATA	GTGGAAAGGACGAAACACCGCAAGAGACCATCTCAAGCATGTTTAAGAGCTATGCTGGAAACAGCATA
MDM4_1473.62	TGTGAGAAAAGACCACGAGA	GTGGAAAGGACGAAACACCG	GTTTAAGAGCTATGCTGGAAACAGCATA	GTGGAAAGGACGAAACACCGTGTGAGAAAAGACCACGAGAGTTTAAGAGCTATGCTGGAAACAGCATA
MDM4_1473.78	TGAATAATGTTCCCGTCTCG	GTGGAAAGGACGAAACACCG	GTTTAAGAGCTATGCTGGAAACAGCATA	GTGGAAAGGACGAAACACCGTGAATAATGTTCCCGTCTCGGTTTAAGAGCTATGCTGGAAACAGCATA
MDM4_1473.64	CGAGACGGGAACATTATTCA	GTGGAAAGGACGAAACACCG	GTTTAAGAGCTATGCTGGAAACAGCATA	GTGGAAAGGACGAAACACCGCGAGACGGGAACATTATTCAGTTTAAGAGCTATGCTGGAAACAGCATA
MDM4_1473.65	ACGGGAACATTATTCATGGA	GTGGAAAGGACGAAACACCG	GTTTAAGAGCTATGCTGGAAACAGCATA	GTGGAAAGGACGAAACACCGACGGGAACATTATTCATGGAGTTTAAGAGCTATGCTGGAAACAGCATA
MDM4_1473.68	CTGTGCCAGAAGACTAAAGA	GTGGAAAGGACGAAACACCG	GTTTAAGAGCTATGCTGGAAACAGCATA	GTGGAAAGGACGAAACACCGCTGTGCCAGAAGACTAAAGAGTTTAAGAGCTATGCTGGAAACAGCATA
MDM4_1473.70	CCAGAAGACTAAAGAAGGCT	GTGGAAAGGACGAAACACCG	GTTTAAGAGCTATGCTGGAAACAGCATA	GTGGAAAGGACGAAACACCGCCAGAAGACTAAAGAAGGCTGTTTAAGAGCTATGCTGGAAACAGCATA
MEX3A_1563.53	CGTGCCCACCTCCGAGCACG	GTGGAAAGGACGAAACACCG	GTTTAAGAGCTATGCTGGAAACAGCATA	GTGGAAAGGACGAAACACCGCGTGCCCACCTCCGAGCACGGTTTAAGAGCTATGCTGGAAACAGCATA
MEX3A_1563.62	CCTACATCAAGACACCGGTG	GTGGAAAGGACGAAACACCG	GTTTAAGAGCTATGCTGGAAACAGCATA	GTGGAAAGGACGAAACACCGCCTACATCAAGACACCGGTGGTTTAAGAGCTATGCTGGAAACAGCATA
MEX3A_1563.71	CATGGTGACAGGGCGACGGG	GTGGAAAGGACGAAACACCG	GTTTAAGAGCTATGCTGGAAACAGCATA	GTGGAAAGGACGAAACACCGCATGGTGACAGGGCGACGGGGTTTAAGAGCTATGCTGGAAACAGCATA
MEX3A_1563.84	TGTGCGGGTGCCCTACCGCG	GTGGAAAGGACGAAACACCG	GTTTAAGAGCTATGCTGGAAACAGCATA	GTGGAAAGGACGAAACACCGTGTGCGGGTGCCCTACCGCGGTTTAAGAGCTATGCTGGAAACAGCATA
MEX3A_1563.264	CACCCGTGATCTCGAACACG	GTGGAAAGGACGAAACACCG	GTTTAAGAGCTATGCTGGAAACAGCATA	GTGGAAAGGACGAAACACCGCACCCGTGATCTCGAACACGGTTTAAGAGCTATGCTGGAAACAGCATA
MEX3A_1563.184	GTTGTGTCCGCAGGGCACAA	GTGGAAAGGACGAAACACCG	GTTTAAGAGCTATGCTGGAAACAGCATA	GTGGAAAGGACGAAACACCGGTTGTGTCCGCAGGGCACAAGTTTAAGAGCTATGCTGGAAACAGCATA
MEX3A_1563.182	CAGAACAGGTTGTGTCCGCA	GTGGAAAGGACGAAACACCG	GTTTAAGAGCTATGCTGGAAACAGCATA	GTGGAAAGGACGAAACACCGCAGAACAGGTTGTGTCCGCAGTTTAAGAGCTATGCTGGAAACAGCATA
MEX3A_1563.181	GCAGAACAGGTTGTGTCCGC	GTGGAAAGGACGAAACACCG	GTTTAAGAGCTATGCTGGAAACAGCATA	GTGGAAAGGACGAAACACCGGCAGAACAGGTTGTGTCCGCGTTTAAGAGCTATGCTGGAAACAGCATA
MEX3A_1563.180	CTGCACACTCCATGCAGAAC	GTGGAAAGGACGAAACACCG	GTTTAAGAGCTATGCTGGAAACAGCATA	GTGGAAAGGACGAAACACCGCTGCACACTCCATGCAGAACGTTTAAGAGCTATGCTGGAAACAGCATA
MEX3A_1563.172	GTGCAGTACGCATCTGCGAG	GTGGAAAGGACGAAACACCG	GTTTAAGAGCTATGCTGGAAACAGCATA	GTGGAAAGGACGAAACACCGGTGCAGTACGCATCTGCGAGGTTTAAGAGCTATGCTGGAAACAGCATA
MEX3A_1563.173	AGTACGCATCTGCGAGAGGA	GTGGAAAGGACGAAACACCG	GTTTAAGAGCTATGCTGGAAACAGCATA	GTGGAAAGGACGAAACACCGAGTACGCATCTGCGAGAGGAGTTTAAGAGCTATGCTGGAAACAGCATA
MEX3A_1563.178	ATGTGGCAGACGGGACACTC	GTGGAAAGGACGAAACACCG	GTTTAAGAGCTATGCTGGAAACAGCATA	GTGGAAAGGACGAAACACCGATGTGGCAGACGGGACACTCGTTTAAGAGCTATGCTGGAAACAGCATA
MEX3B_1710.174	CGAAGCACACGGAGCAGTCG	GTGGAAAGGACGAAACACCG	GTTTAAGAGCTATGCTGGAAACAGCATA	GTGGAAAGGACGAAACACCGCGAAGCACACGGAGCAGTCGGTTTAAGAGCTATGCTGGAAACAGCATA
MEX3B_1710.327	CTCGGCGACATGCTCAGAAC	GTGGAAAGGACGAAACACCG	GTTTAAGAGCTATGCTGGAAACAGCATA	GTGGAAAGGACGAAACACCGCTCGGCGACATGCTCAGAACGTTTAAGAGCTATGCTGGAAACAGCATA
MEX3B_1710.34	CTTTGTTGTGACGGGCAGGA	GTGGAAAGGACGAAACACCG	GTTTAAGAGCTATGCTGGAAACAGCATA	GTGGAAAGGACGAAACACCGCTTTGTTGTGACGGGCAGGAGTTTAAGAGCTATGCTGGAAACAGCATA
MEX3B_1710.51	AGTGCGGGTACCCTACCGCG	GTGGAAAGGACGAAACACCG	GTTTAAGAGCTATGCTGGAAACAGCATA	GTGGAAAGGACGAAACACCGAGTGCGGGTACCCTACCGCGGTTTAAGAGCTATGCTGGAAACAGCATA
MEX3B_1710.62	CGTGACGCCCAGCCGGGATA	GTGGAAAGGACGAAACACCG	GTTTAAGAGCTATGCTGGAAACAGCATA	GTGGAAAGGACGAAACACCGCGTGACGCCCAGCCGGGATAGTTTAAGAGCTATGCTGGAAACAGCATA
MEX3B_1710.173	CACTTCGCTCTCGAAGCACA	GTGGAAAGGACGAAACACCG	GTTTAAGAGCTATGCTGGAAACAGCATA	GTGGAAAGGACGAAACACCGCACTTCGCTCTCGAAGCACAGTTTAAGAGCTATGCTGGAAACAGCATA
MEX3B_1710.155	GAGCGAAGTGATTGCCGCGC	GTGGAAAGGACGAAACACCG	GTTTAAGAGCTATGCTGGAAACAGCATA	GTGGAAAGGACGAAACACCGGAGCGAAGTGATTGCCGCGCGTTTAAGAGCTATGCTGGAAACAGCATA
MEX3B_1710.156	ATTGCCGCGCTGGTGCCCTG	GTGGAAAGGACGAAACACCG	GTTTAAGAGCTATGCTGGAAACAGCATA	GTGGAAAGGACGAAACACCGATTGCCGCGCTGGTGCCCTGGTTTAAGAGCTATGCTGGAAACAGCATA
MEX3B_1710.167	GCTCTTCTCACAGATGCGAT	GTGGAAAGGACGAAACACCG	GTTTAAGAGCTATGCTGGAAACAGCATA	GTGGAAAGGACGAAACACCGGCTCTTCTCACAGATGCGATGTTTAAGAGCTATGCTGGAAACAGCATA
MEX3B_1710.158	GAAGAGCGAGCCCGAGTGCC	GTGGAAAGGACGAAACACCG	GTTTAAGAGCTATGCTGGAAACAGCATA	GTGGAAAGGACGAAACACCGGAAGAGCGAGCCCGAGTGCCGTTTAAGAGCTATGCTGGAAACAGCATA
MEX3B_1710.159	GTGCCCGGTCTGCCACACCG	GTGGAAAGGACGAAACACCG	GTTTAAGAGCTATGCTGGAAACAGCATA	GTGGAAAGGACGAAACACCGGTGCCCGGTCTGCCACACCGGTTTAAGAGCTATGCTGGAAACAGCATA
MEX3C_1980.119	TATATCAAGACTCCTGTTCG	GTGGAAAGGACGAAACACCG	GTTTAAGAGCTATGCTGGAAACAGCATA	GTGGAAAGGACGAAACACCGTATATCAAGACTCCTGTTCGGTTTAAGAGCTATGCTGGAAACAGCATA
MEX3C_1980.238	ACTAATCCTACCACACGATA	GTGGAAAGGACGAAACACCG	GTTTAAGAGCTATGCTGGAAACAGCATA	GTGGAAAGGACGAAACACCGACTAATCCTACCACACGATAGTTTAAGAGCTATGCTGGAAACAGCATA
MEX3C_1980.233	TCTGCTCGGAGTTACTATGT	GTGGAAAGGACGAAACACCG	GTTTAAGAGCTATGCTGGAAACAGCATA	GTGGAAAGGACGAAACACCGTCTGCTCGGAGTTACTATGTGTTTAAGAGCTATGCTGGAAACAGCATA
MEX3C_1980.172	ATTGCTGCCCTAGTTCCATG	GTGGAAAGGACGAAACACCG	GTTTAAGAGCTATGCTGGAAACAGCATA	GTGGAAAGGACGAAACACCGATTGCTGCCCTAGTTCCATGGTTTAAGAGCTATGCTGGAAACAGCATA
MEX3C_1980.183	GTTGTGGCCACATGGAACTA	GTGGAAAGGACGAAACACCG	GTTTAAGAGCTATGCTGGAAACAGCATA	GTGGAAAGGACGAAACACCGGTTGTGGCCACATGGAACTAGTTTAAGAGCTATGCTGGAAACAGCATA
MEX3C_1980.177	GTCTGGCAAACTGGACATGA	GTGGAAAGGACGAAACACCG	GTTTAAGAGCTATGCTGGAAACAGCATA	GTGGAAAGGACGAAACACCGGTCTGGCAAACTGGACATGAGTTTAAGAGCTATGCTGGAAACAGCATA
MEX3C_1980.176	GTAACAGCTGTCTGGCAAAC	GTGGAAAGGACGAAACACCG	GTTTAAGAGCTATGCTGGAAACAGCATA	GTGGAAAGGACGAAACACCGGTAACAGCTGTCTGGCAAACGTTTAAGAGCTATGCTGGAAACAGCATA
MEX3C_1980.175	TTGCCTGAGTAACAGCTGTC	GTGGAAAGGACGAAACACCG	GTTTAAGAGCTATGCTGGAAACAGCATA	GTGGAAAGGACGAAACACCGTTGCCTGAGTAACAGCTGTCGTTTAAGAGCTATGCTGGAAACAGCATA
MEX3C_1980.174	TTGCCAGACAGCTGTTACTC	GTGGAAAGGACGAAACACCG	GTTTAAGAGCTATGCTGGAAACAGCATA	GTGGAAAGGACGAAACACCGTTGCCAGACAGCTGTTACTCGTTTAAGAGCTATGCTGGAAACAGCATA
MEX3D_2001.473	GGTGTTTGTCTTGGCCCGCA	GTGGAAAGGACGAAACACCG	GTTTAAGAGCTATGCTGGAAACAGCATA	GTGGAAAGGACGAAACACCGGGTGTTTGTCTTGGCCCGCAGTTTAAGAGCTATGCTGGAAACAGCATA
MEX3D_2001.99	GAGCCGGTCTTCATCGTGAC	GTGGAAAGGACGAAACACCG	GTTTAAGAGCTATGCTGGAAACAGCATA	GTGGAAAGGACGAAACACCGGAGCCGGTCTTCATCGTGACGTTTAAGAGCTATGCTGGAAACAGCATA
MEX3D_2001.117	TCCAGGTGCGCGTGCCCTAC	GTGGAAAGGACGAAACACCG	GTTTAAGAGCTATGCTGGAAACAGCATA	GTGGAAAGGACGAAACACCGTCCAGGTGCGCGTGCCCTACGTTTAAGAGCTATGCTGGAAACAGCATA
MEX3D_2001.437	GCGCTTGATGGTGGCGCCCT	GTGGAAAGGACGAAACACCG	GTTTAAGAGCTATGCTGGAAACAGCATA	GTGGAAAGGACGAAACACCGGCGCTTGATGGTGGCGCCCTGTTTAAGAGCTATGCTGGAAACAGCATA
MEX3D_2001.136	GAGCCGGTGTTCGCGGTCAC	GTGGAAAGGACGAAACACCG	GTTTAAGAGCTATGCTGGAAACAGCATA	GTGGAAAGGACGAAACACCGGAGCCGGTGTTCGCGGTCACGTTTAAGAGCTATGCTGGAAACAGCATA
MEX3D_2001.228	GAGTGCGTGGTGTGCGCCGA	GTGGAAAGGACGAAACACCG	GTTTAAGAGCTATGCTGGAAACAGCATA	GTGGAAAGGACGAAACACCGGAGTGCGTGGTGTGCGCCGAGTTTAAGAGCTATGCTGGAAACAGCATA
MEX3D_2001.229	CGTGGTGTGCGCCGAGGGCG	GTGGAAAGGACGAAACACCG	GTTTAAGAGCTATGCTGGAAACAGCATA	GTGGAAAGGACGAAACACCGCGTGGTGTGCGCCGAGGGCGGTTTAAGAGCTATGCTGGAAACAGCATA
MEX3D_2001.264	AGAAGAGGTTGTGGCCGCAG	GTGGAAAGGACGAAACACCG	GTTTAAGAGCTATGCTGGAAACAGCATA	GTGGAAAGGACGAAACACCGAGAAGAGGTTGTGGCCGCAGGTTTAAGAGCTATGCTGGAAACAGCATA
MEX3D_2001.234	GACTGCGCCGTCCGCATCTG	GTGGAAAGGACGAAACACCG	GTTTAAGAGCTATGCTGGAAACAGCATA	GTGGAAAGGACGAAACACCGGACTGCGCCGTCCGCATCTGGTTTAAGAGCTATGCTGGAAACAGCATA
MEX3D_2001.258	GCTCGCTCTTGCCGCAGATG	GTGGAAAGGACGAAACACCG	GTTTAAGAGCTATGCTGGAAACAGCATA	GTGGAAAGGACGAAACACCGGCTCGCTCTTGCCGCAGATGGTTTAAGAGCTATGCTGGAAACAGCATA
MEX3D_2001.235	GTGTCCCGCCTGCCGCACGC	GTGGAAAGGACGAAACACCG	GTTTAAGAGCTATGCTGGAAACAGCATA	GTGGAAAGGACGAAACACCGGTGTCCCGCCTGCCGCACGCGTTTAAGAGCTATGCTGGAAACAGCATA
MGRN1_1731.272	CAATGCCATAGATCTCCTGC	GTGGAAAGGACGAAACACCG	GTTTAAGAGCTATGCTGGAAACAGCATA	GTGGAAAGGACGAAACACCGCAATGCCATAGATCTCCTGCGTTTAAGAGCTATGCTGGAAACAGCATA
MGRN1_1731.63	TGGTGTGCCTGTCCGACCTG	GTGGAAAGGACGAAACACCG	GTTTAAGAGCTATGCTGGAAACAGCATA	GTGGAAAGGACGAAACACCGTGGTGTGCCTGTCCGACCTGGTTTAAGAGCTATGCTGGAAACAGCATA
MGRN1_1731.267	GCGTGTCCCGCAGGTCGGAC	GTGGAAAGGACGAAACACCG	GTTTAAGAGCTATGCTGGAAACAGCATA	GTGGAAAGGACGAAACACCGGCGTGTCCCGCAGGTCGGACGTTTAAGAGCTATGCTGGAAACAGCATA
MGRN1_1731.266	GATCAGCGTGTCCCGCAGGT	GTGGAAAGGACGAAACACCG	GTTTAAGAGCTATGCTGGAAACAGCATA	GTGGAAAGGACGAAACACCGGATCAGCGTGTCCCGCAGGTGTTTAAGAGCTATGCTGGAAACAGCATA
MGRN1_1731.258	TGTCGGCGCAGGAGGTACAG	GTGGAAAGGACGAAACACCG	GTTTAAGAGCTATGCTGGAAACAGCATA	GTGGAAAGGACGAAACACCGTGTCGGCGCAGGAGGTACAGGTTTAAGAGCTATGCTGGAAACAGCATA
MGRN1_1731.257	GCGCAGCGTGTCGGCGCAGG	GTGGAAAGGACGAAACACCG	GTTTAAGAGCTATGCTGGAAACAGCATA	GTGGAAAGGACGAAACACCGGCGCAGCGTGTCGGCGCAGGGTTTAAGAGCTATGCTGGAAACAGCATA
MGRN1_1731.256	GTAGCGCAGCGTGTCGGCGC	GTGGAAAGGACGAAACACCG	GTTTAAGAGCTATGCTGGAAACAGCATA	GTGGAAAGGACGAAACACCGGTAGCGCAGCGTGTCGGCGCGTTTAAGAGCTATGCTGGAAACAGCATA
MGRN1_1731.255	GGCCTGGTAGCGCAGCGTGT	GTGGAAAGGACGAAACACCG	GTTTAAGAGCTATGCTGGAAACAGCATA	GTGGAAAGGACGAAACACCGGGCCTGGTAGCGCAGCGTGTGTTTAAGAGCTATGCTGGAAACAGCATA
MGRN1_1731.65	CGCCGACACGCTGCGCTACC	GTGGAAAGGACGAAACACCG	GTTTAAGAGCTATGCTGGAAACAGCATA	GTGGAAAGGACGAAACACCGCGCCGACACGCTGCGCTACCGTTTAAGAGCTATGCTGGAAACAGCATA
MGRN1_1731.244	TCCGCACCGCCCGGATCTGC	GTGGAAAGGACGAAACACCG	GTTTAAGAGCTATGCTGGAAACAGCATA	GTGGAAAGGACGAAACACCGTCCGCACCGCCCGGATCTGCGTTTAAGAGCTATGCTGGAAACAGCATA
MGRN1_1731.205	CTTCATAAAGAGGGGCCGAG	GTGGAAAGGACGAAACACCG	GTTTAAGAGCTATGCTGGAAACAGCATA	GTGGAAAGGACGAAACACCGCTTCATAAAGAGGGGCCGAGGTTTAAGAGCTATGCTGGAAACAGCATA
MIB1_3021.23	GACGGCGGCGAGGGCCATGT	GTGGAAAGGACGAAACACCG	GTTTAAGAGCTATGCTGGAAACAGCATA	GTGGAAAGGACGAAACACCGGACGGCGGCGAGGGCCATGTGTTTAAGAGCTATGCTGGAAACAGCATA
MIB1_3021.38	TGCCGCCAGCAACCAATCAT	GTGGAAAGGACGAAACACCG	GTTTAAGAGCTATGCTGGAAACAGCATA	GTGGAAAGGACGAAACACCGTGCCGCCAGCAACCAATCATGTTTAAGAGCTATGCTGGAAACAGCATA
MIB1_3021.63	ATAGCGCAGCATATGTCCTC	GTGGAAAGGACGAAACACCG	GTTTAAGAGCTATGCTGGAAACAGCATA	GTGGAAAGGACGAAACACCGATAGCGCAGCATATGTCCTCGTTTAAGAGCTATGCTGGAAACAGCATA
MIB1_3021.141	TGGTTATACTGCCTTACATC	GTGGAAAGGACGAAACACCG	GTTTAAGAGCTATGCTGGAAACAGCATA	GTGGAAAGGACGAAACACCGTGGTTATACTGCCTTACATCGTTTAAGAGCTATGCTGGAAACAGCATA
MIB1_3021.166	AATAATGGGACTTGGTACCC	GTGGAAAGGACGAAACACCG	GTTTAAGAGCTATGCTGGAAACAGCATA	GTGGAAAGGACGAAACACCGAATAATGGGACTTGGTACCCGTTTAAGAGCTATGCTGGAAACAGCATA
MIB1_3021.172	CCTGAGCATTCGAAATAAGA	GTGGAAAGGACGAAACACCG	GTTTAAGAGCTATGCTGGAAACAGCATA	GTGGAAAGGACGAAACACCGCCTGAGCATTCGAAATAAGAGTTTAAGAGCTATGCTGGAAACAGCATA
MIB1_3021.218	GCACACCATACACTCTTCTA	GTGGAAAGGACGAAACACCG	GTTTAAGAGCTATGCTGGAAACAGCATA	GTGGAAAGGACGAAACACCGGCACACCATACACTCTTCTAGTTTAAGAGCTATGCTGGAAACAGCATA
MIB1_3021.182	GATACTCTTTTTGGTCCATG	GTGGAAAGGACGAAACACCG	GTTTAAGAGCTATGCTGGAAACAGCATA	GTGGAAAGGACGAAACACCGGATACTCTTTTTGGTCCATGGTTTAAGAGCTATGCTGGAAACAGCATA
MIB1_3021.217	CAGGTAGCAATATGTCCACA	GTGGAAAGGACGAAACACCG	GTTTAAGAGCTATGCTGGAAACAGCATA	GTGGAAAGGACGAAACACCGCAGGTAGCAATATGTCCACAGTTTAAGAGCTATGCTGGAAACAGCATA
MIB1_3021.215	ATGAGGCATTTCTTGACACG	GTGGAAAGGACGAAACACCG	GTTTAAGAGCTATGCTGGAAACAGCATA	GTGGAAAGGACGAAACACCGATGAGGCATTTCTTGACACGGTTTAAGAGCTATGCTGGAAACAGCATA
MIB1_3021.184	GTAAAGAACAGGTTCAATCC	GTGGAAAGGACGAAACACCG	GTTTAAGAGCTATGCTGGAAACAGCATA	GTGGAAAGGACGAAACACCGGTAAAGAACAGGTTCAATCCGTTTAAGAGCTATGCTGGAAACAGCATA
MIB1_3021.203	TTCAGACGATCTAGACACAC	GTGGAAAGGACGAAACACCG	GTTTAAGAGCTATGCTGGAAACAGCATA	GTGGAAAGGACGAAACACCGTTCAGACGATCTAGACACACGTTTAAGAGCTATGCTGGAAACAGCATA
MIB1_3021.202	GACAGGTTCCGTGACCACAA	GTGGAAAGGACGAAACACCG	GTTTAAGAGCTATGCTGGAAACAGCATA	GTGGAAAGGACGAAACACCGGACAGGTTCCGTGACCACAAGTTTAAGAGCTATGCTGGAAACAGCATA
MIB1_3021.201	GCGGTCTCCACAGAGTTGAC	GTGGAAAGGACGAAACACCG	GTTTAAGAGCTATGCTGGAAACAGCATA	GTGGAAAGGACGAAACACCGGCGGTCTCCACAGAGTTGACGTTTAAGAGCTATGCTGGAAACAGCATA
MIB1_3021.200	AGATAGGACATTCACTCATG	GTGGAAAGGACGAAACACCG	GTTTAAGAGCTATGCTGGAAACAGCATA	GTGGAAAGGACGAAACACCGAGATAGGACATTCACTCATGGTTTAAGAGCTATGCTGGAAACAGCATA
MIB1_3021.197	TGAATGTCCTATCTGTCGCA	GTGGAAAGGACGAAACACCG	GTTTAAGAGCTATGCTGGAAACAGCATA	GTGGAAAGGACGAAACACCGTGAATGTCCTATCTGTCGCAGTTTAAGAGCTATGCTGGAAACAGCATA
MIB1_3021.199	TCAATAGCCTTGCGACAGAT	GTGGAAAGGACGAAACACCG	GTTTAAGAGCTATGCTGGAAACAGCATA	GTGGAAAGGACGAAACACCGTCAATAGCCTTGCGACAGATGTTTAAGAGCTATGCTGGAAACAGCATA
MIB1_3021.186	GCTGTTCTTTTTCAACCCTG	GTGGAAAGGACGAAACACCG	GTTTAAGAGCTATGCTGGAAACAGCATA	GTGGAAAGGACGAAACACCGGCTGTTCTTTTTCAACCCTGGTTTAAGAGCTATGCTGGAAACAGCATA
MIB1_3021.209	ACTGCACACACTTTTTCATC	GTGGAAAGGACGAAACACCG	GTTTAAGAGCTATGCTGGAAACAGCATA	GTGGAAAGGACGAAACACCGACTGCACACACTTTTTCATCGTTTAAGAGCTATGCTGGAAACAGCATA
MIB2_3213.669	CTGTGCGGTCGGGTGTCGAG	GTGGAAAGGACGAAACACCG	GTTTAAGAGCTATGCTGGAAACAGCATA	GTGGAAAGGACGAAACACCGCTGTGCGGTCGGGTGTCGAGGTTTAAGAGCTATGCTGGAAACAGCATA
MIB2_3213.84	TGCAAGAAGCACGGGCTGCG	GTGGAAAGGACGAAACACCG	GTTTAAGAGCTATGCTGGAAACAGCATA	GTGGAAAGGACGAAACACCGTGCAAGAAGCACGGGCTGCGGTTTAAGAGCTATGCTGGAAACAGCATA
MIB2_3213.117	TGTGGTGGACATCCGTGGCT	GTGGAAAGGACGAAACACCG	GTTTAAGAGCTATGCTGGAAACAGCATA	GTGGAAAGGACGAAACACCGTGTGGTGGACATCCGTGGCTGTTTAAGAGCTATGCTGGAAACAGCATA
MIB2_3213.551	GCAGCCGTATCAACTCCACC	GTGGAAAGGACGAAACACCG	GTTTAAGAGCTATGCTGGAAACAGCATA	GTGGAAAGGACGAAACACCGGCAGCCGTATCAACTCCACCGTTTAAGAGCTATGCTGGAAACAGCATA
MIB2_3213.539	TGCTGTTGATGGCGTCCGCC	GTGGAAAGGACGAAACACCG	GTTTAAGAGCTATGCTGGAAACAGCATA	GTGGAAAGGACGAAACACCGTGCTGTTGATGGCGTCCGCCGTTTAAGAGCTATGCTGGAAACAGCATA
MIB2_3213.291	TGCCCTCAACAACCACCGCG	GTGGAAAGGACGAAACACCG	GTTTAAGAGCTATGCTGGAAACAGCATA	GTGGAAAGGACGAAACACCGTGCCCTCAACAACCACCGCGGTTTAAGAGCTATGCTGGAAACAGCATA
MIB2_3213.303	CGTGGGGCTGGTGCCGCTAC	GTGGAAAGGACGAAACACCG	GTTTAAGAGCTATGCTGGAAACAGCATA	GTGGAAAGGACGAAACACCGCGTGGGGCTGGTGCCGCTACGTTTAAGAGCTATGCTGGAAACAGCATA
MIB2_3213.374	GTGCCTGGTGTGCTCCGAGC	GTGGAAAGGACGAAACACCG	GTTTAAGAGCTATGCTGGAAACAGCATA	GTGGAAAGGACGAAACACCGGTGCCTGGTGTGCTCCGAGCGTTTAAGAGCTATGCTGGAAACAGCATA
MIB2_3213.375	GTGCTCCGAGCTGGCGCTGC	GTGGAAAGGACGAAACACCG	GTTTAAGAGCTATGCTGGAAACAGCATA	GTGGAAAGGACGAAACACCGGTGCTCCGAGCTGGCGCTGCGTTTAAGAGCTATGCTGGAAACAGCATA
MIB2_3213.438	CACACGGTGCGGTGCTGGCA	GTGGAAAGGACGAAACACCG	GTTTAAGAGCTATGCTGGAAACAGCATA	GTGGAAAGGACGAAACACCGCACACGGTGCGGTGCTGGCAGTTTAAGAGCTATGCTGGAAACAGCATA
MIB2_3213.437	CCTCACACACGGTGCGGTGC	GTGGAAAGGACGAAACACCG	GTTTAAGAGCTATGCTGGAAACAGCATA	GTGGAAAGGACGAAACACCGCCTCACACACGGTGCGGTGCGTTTAAGAGCTATGCTGGAAACAGCATA
MIB2_3213.376	CCAGCACCGCACCGTGTGTG	GTGGAAAGGACGAAACACCG	GTTTAAGAGCTATGCTGGAAACAGCATA	GTGGAAAGGACGAAACACCGCCAGCACCGCACCGTGTGTGGTTTAAGAGCTATGCTGGAAACAGCATA
MIB2_3213.434	GTTTCTTGCTGACGACCACC	GTGGAAAGGACGAAACACCG	GTTTAAGAGCTATGCTGGAAACAGCATA	GTGGAAAGGACGAAACACCGGTTTCTTGCTGACGACCACCGTTTAAGAGCTATGCTGGAAACAGCATA
MIB2_3213.414	ATGTGGCTGTCGATGCAGAT	GTGGAAAGGACGAAACACCG	GTTTAAGAGCTATGCTGGAAACAGCATA	GTGGAAAGGACGAAACACCGATGTGGCTGTCGATGCAGATGTTTAAGAGCTATGCTGGAAACAGCATA
MIB2_3213.412	ACTGGAACACGAGGCGGATG	GTGGAAAGGACGAAACACCG	GTTTAAGAGCTATGCTGGAAACAGCATA	GTGGAAAGGACGAAACACCGACTGGAACACGAGGCGGATGGTTTAAGAGCTATGCTGGAAACAGCATA
MIB2_3213.391	ATCCGCCTCGTGTTCCAGTG	GTGGAAAGGACGAAACACCG	GTTTAAGAGCTATGCTGGAAACAGCATA	GTGGAAAGGACGAAACACCGATCCGCCTCGTGTTCCAGTGGTTTAAGAGCTATGCTGGAAACAGCATA
MIB2_3213.393	CACGGCGCATGCGCCCCCTG	GTGGAAAGGACGAAACACCG	GTTTAAGAGCTATGCTGGAAACAGCATA	GTGGAAAGGACGAAACACCGCACGGCGCATGCGCCCCCTGGTTTAAGAGCTATGCTGGAAACAGCATA
MIB2_3213.405	GCGCTGAGCGCGGAGCCGCA	GTGGAAAGGACGAAACACCG	GTTTAAGAGCTATGCTGGAAACAGCATA	GTGGAAAGGACGAAACACCGGCGCTGAGCGCGGAGCCGCAGTTTAAGAGCTATGCTGGAAACAGCATA
MIB2_3213.400	CGGATGGGCTGGCGGCAGAT	GTGGAAAGGACGAAACACCG	GTTTAAGAGCTATGCTGGAAACAGCATA	GTGGAAAGGACGAAACACCGCGGATGGGCTGGCGGCAGATGTTTAAGAGCTATGCTGGAAACAGCATA
MID1_2004.0	ACTGACCTGCCCTATTTGTC	GTGGAAAGGACGAAACACCG	GTTTAAGAGCTATGCTGGAAACAGCATA	GTGGAAAGGACGAAACACCGACTGACCTGCCCTATTTGTCGTTTAAGAGCTATGCTGGAAACAGCATA
MID1_2004.245	TGTGCGCAGGGCAGTAGAAG	GTGGAAAGGACGAAACACCG	GTTTAAGAGCTATGCTGGAAACAGCATA	GTGGAAAGGACGAAACACCGTGTGCGCAGGGCAGTAGAAGGTTTAAGAGCTATGCTGGAAACAGCATA
MID1_2004.241	GTGTGATACTAGGATGCGGT	GTGGAAAGGACGAAACACCG	GTTTAAGAGCTATGCTGGAAACAGCATA	GTGGAAAGGACGAAACACCGGTGTGATACTAGGATGCGGTGTTTAAGAGCTATGCTGGAAACAGCATA
MID1_2004.237	GGACTCCACAGACTCGTTGG	GTGGAAAGGACGAAACACCG	GTTTAAGAGCTATGCTGGAAACAGCATA	GTGGAAAGGACGAAACACCGGGACTCCACAGACTCGTTGGGTTTAAGAGCTATGCTGGAAACAGCATA
MID1_2004.236	GATGGACTCCACAGACTCGT	GTGGAAAGGACGAAACACCG	GTTTAAGAGCTATGCTGGAAACAGCATA	GTGGAAAGGACGAAACACCGGATGGACTCCACAGACTCGTGTTTAAGAGCTATGCTGGAAACAGCATA
MID1_2004.230	GTGATGACATGCCGGCAGGT	GTGGAAAGGACGAAACACCG	GTTTAAGAGCTATGCTGGAAACAGCATA	GTGGAAAGGACGAAACACCGGTGATGACATGCCGGCAGGTGTTTAAGAGCTATGCTGGAAACAGCATA
MID1_2004.203	CACAGGTCTTCACAGCGTCC	GTGGAAAGGACGAAACACCG	GTTTAAGAGCTATGCTGGAAACAGCATA	GTGGAAAGGACGAAACACCGCACAGGTCTTCACAGCGTCCGTTTAAGAGCTATGCTGGAAACAGCATA
MID1_2004.190	GGCACAGATTAACTGGTCAT	GTGGAAAGGACGAAACACCG	GTTTAAGAGCTATGCTGGAAACAGCATA	GTGGAAAGGACGAAACACCGGGCACAGATTAACTGGTCATGTTTAAGAGCTATGCTGGAAACAGCATA
MID1_2004.52	TGTGTAATTCGGCTGATAGC	GTGGAAAGGACGAAACACCG	GTTTAAGAGCTATGCTGGAAACAGCATA	GTGGAAAGGACGAAACACCGTGTGTAATTCGGCTGATAGCGTTTAAGAGCTATGCTGGAAACAGCATA
MID1_2004.72	TTGATAGTGGCCGGCATTAT	GTGGAAAGGACGAAACACCG	GTTTAAGAGCTATGCTGGAAACAGCATA	GTGGAAAGGACGAAACACCGTTGATAGTGGCCGGCATTATGTTTAAGAGCTATGCTGGAAACAGCATA
MID1_2004.108	ATGCGACGTCGAAGGTGTAG	GTGGAAAGGACGAAACACCG	GTTTAAGAGCTATGCTGGAAACAGCATA	GTGGAAAGGACGAAACACCGATGCGACGTCGAAGGTGTAGGTTTAAGAGCTATGCTGGAAACAGCATA
MID2_2208.267	CAACTCTAGGCAGATTGGAC	GTGGAAAGGACGAAACACCG	GTTTAAGAGCTATGCTGGAAACAGCATA	GTGGAAAGGACGAAACACCGCAACTCTAGGCAGATTGGACGTTTAAGAGCTATGCTGGAAACAGCATA
MID2_2208.265	GGGGGTCTTCAAACAACTCT	GTGGAAAGGACGAAACACCG	GTTTAAGAGCTATGCTGGAAACAGCATA	GTGGAAAGGACGAAACACCGGGGGGTCTTCAAACAACTCTGTTTAAGAGCTATGCTGGAAACAGCATA
MID2_2208.260	AGCAGAGGCTGTGAGCACAA	GTGGAAAGGACGAAACACCG	GTTTAAGAGCTATGCTGGAAACAGCATA	GTGGAAAGGACGAAACACCGAGCAGAGGCTGTGAGCACAAGTTTAAGAGCTATGCTGGAAACAGCATA
MID2_2208.5	CAGCTGTGCCCATCGCATTT	GTGGAAAGGACGAAACACCG	GTTTAAGAGCTATGCTGGAAACAGCATA	GTGGAAAGGACGAAACACCGCAGCTGTGCCCATCGCATTTGTTTAAGAGCTATGCTGGAAACAGCATA
MID2_2208.257	GCTTGATACCAAAATGCGAT	GTGGAAAGGACGAAACACCG	GTTTAAGAGCTATGCTGGAAACAGCATA	GTGGAAAGGACGAAACACCGGCTTGATACCAAAATGCGATGTTTAAGAGCTATGCTGGAAACAGCATA
MID2_2208.6	TTGGTATCAAGCTGCAGCTC	GTGGAAAGGACGAAACACCG	GTTTAAGAGCTATGCTGGAAACAGCATA	GTGGAAAGGACGAAACACCGTTGGTATCAAGCTGCAGCTCGTTTAAGAGCTATGCTGGAAACAGCATA
MID2_2208.252	CATACCTGCAGGTAGGACAC	GTGGAAAGGACGAAACACCG	GTTTAAGAGCTATGCTGGAAACAGCATA	GTGGAAAGGACGAAACACCGCATACCTGCAGGTAGGACACGTTTAAGAGCTATGCTGGAAACAGCATA
MID2_2208.210	ACGACCCACCAGTTTGCATA	GTGGAAAGGACGAAACACCG	GTTTAAGAGCTATGCTGGAAACAGCATA	GTGGAAAGGACGAAACACCGACGACCCACCAGTTTGCATAGTTTAAGAGCTATGCTGGAAACAGCATA
MID2_2208.199	TTGACCGTTCAAGACACTGG	GTGGAAAGGACGAAACACCG	GTTTAAGAGCTATGCTGGAAACAGCATA	GTGGAAAGGACGAAACACCGTTGACCGTTCAAGACACTGGGTTTAAGAGCTATGCTGGAAACAGCATA
MID2_2208.180	CGAGATCCAGTGGACTGTAA	GTGGAAAGGACGAAACACCG	GTTTAAGAGCTATGCTGGAAACAGCATA	GTGGAAAGGACGAAACACCGCGAGATCCAGTGGACTGTAAGTTTAAGAGCTATGCTGGAAACAGCATA
MID2_2208.71	AAGCTGCTCAAGATTGGCCG	GTGGAAAGGACGAAACACCG	GTTTAAGAGCTATGCTGGAAACAGCATA	GTGGAAAGGACGAAACACCGAAGCTGCTCAAGATTGGCCGGTTTAAGAGCTATGCTGGAAACAGCATA
MID2_2208.92	TTGACAGTGGCTGCCACTAT	GTGGAAAGGACGAAACACCG	GTTTAAGAGCTATGCTGGAAACAGCATA	GTGGAAAGGACGAAACACCGTTGACAGTGGCTGCCACTATGTTTAAGAGCTATGCTGGAAACAGCATA
MID2_2208.108	GCCCCCACACCTGAAGCGTC	GTGGAAAGGACGAAACACCG	GTTTAAGAGCTATGCTGGAAACAGCATA	GTGGAAAGGACGAAACACCGGCCCCCACACCTGAAGCGTCGTTTAAGAGCTATGCTGGAAACAGCATA
MKRN1_1449.54	AGTGGGAGAGTGCCGATACG	GTGGAAAGGACGAAACACCG	GTTTAAGAGCTATGCTGGAAACAGCATA	GTGGAAAGGACGAAACACCGAGTGGGAGAGTGCCGATACGGTTTAAGAGCTATGCTGGAAACAGCATA
MKRN1_1449.143	TTTGATATGCTGCGATCTCT	GTGGAAAGGACGAAACACCG	GTTTAAGAGCTATGCTGGAAACAGCATA	GTGGAAAGGACGAAACACCGTTTGATATGCTGCGATCTCTGTTTAAGAGCTATGCTGGAAACAGCATA
MKRN1_1449.138	GAAGCGGCGCTCACTGGGGT	GTGGAAAGGACGAAACACCG	GTTTAAGAGCTATGCTGGAAACAGCATA	GTGGAAAGGACGAAACACCGGAAGCGGCGCTCACTGGGGTGTTTAAGAGCTATGCTGGAAACAGCATA
MKRN1_1449.137	TCCCGAAGCGGCGCTCACTG	GTGGAAAGGACGAAACACCG	GTTTAAGAGCTATGCTGGAAACAGCATA	GTGGAAAGGACGAAACACCGTCCCGAAGCGGCGCTCACTGGTTTAAGAGCTATGCTGGAAACAGCATA
MKRN1_1449.136	ATCCCGAAGCGGCGCTCACT	GTGGAAAGGACGAAACACCG	GTTTAAGAGCTATGCTGGAAACAGCATA	GTGGAAAGGACGAAACACCGATCCCGAAGCGGCGCTCACTGTTTAAGAGCTATGCTGGAAACAGCATA
MKRN1_1449.135	GATCCCGAAGCGGCGCTCAC	GTGGAAAGGACGAAACACCG	GTTTAAGAGCTATGCTGGAAACAGCATA	GTGGAAAGGACGAAACACCGGATCCCGAAGCGGCGCTCACGTTTAAGAGCTATGCTGGAAACAGCATA
MKRN1_1449.70	AACCCCAGTGAGCGCCGCTT	GTGGAAAGGACGAAACACCG	GTTTAAGAGCTATGCTGGAAACAGCATA	GTGGAAAGGACGAAACACCGAACCCCAGTGAGCGCCGCTTGTTTAAGAGCTATGCTGGAAACAGCATA
MKRN1_1449.71	ACCCCAGTGAGCGCCGCTTC	GTGGAAAGGACGAAACACCG	GTTTAAGAGCTATGCTGGAAACAGCATA	GTGGAAAGGACGAAACACCGACCCCAGTGAGCGCCGCTTCGTTTAAGAGCTATGCTGGAAACAGCATA
MKRN2_1251.47	CAAAGTGTGCAGTATCTGCA	GTGGAAAGGACGAAACACCG	GTTTAAGAGCTATGCTGGAAACAGCATA	GTGGAAAGGACGAAACACCGCAAAGTGTGCAGTATCTGCAGTTTAAGAGCTATGCTGGAAACAGCATA
MKRN2_1251.111	AAATCTCCTCTCAGAAGCAG	GTGGAAAGGACGAAACACCG	GTTTAAGAGCTATGCTGGAAACAGCATA	GTGGAAAGGACGAAACACCGAAATCTCCTCTCAGAAGCAGGTTTAAGAGCTATGCTGGAAACAGCATA
MKRN2_1251.172	TAGTACTTGCAGATGGTGGA	GTGGAAAGGACGAAACACCG	GTTTAAGAGCTATGCTGGAAACAGCATA	GTGGAAAGGACGAAACACCGTAGTACTTGCAGATGGTGGAGTTTAAGAGCTATGCTGGAAACAGCATA
MKRN2_1251.122	CTCCCCGTGCAGGTAGACAC	GTGGAAAGGACGAAACACCG	GTTTAAGAGCTATGCTGGAAACAGCATA	GTGGAAAGGACGAAACACCGCTCCCCGTGCAGGTAGACACGTTTAAGAGCTATGCTGGAAACAGCATA
MKRN2_1251.41	ACCCATTCGACCCAGAGCAG	GTGGAAAGGACGAAACACCG	GTTTAAGAGCTATGCTGGAAACAGCATA	GTGGAAAGGACGAAACACCGACCCATTCGACCCAGAGCAGGTTTAAGAGCTATGCTGGAAACAGCATA
MKRN2_1251.48	TATCTGCATGGAAGTGATCC	GTGGAAAGGACGAAACACCG	GTTTAAGAGCTATGCTGGAAACAGCATA	GTGGAAAGGACGAAACACCGTATCTGCATGGAAGTGATCCGTTTAAGAGCTATGCTGGAAACAGCATA
MKRN2_1251.52	CTGCTTCTGAGAGGAGATTT	GTGGAAAGGACGAAACACCG	GTTTAAGAGCTATGCTGGAAACAGCATA	GTGGAAAGGACGAAACACCGCTGCTTCTGAGAGGAGATTTGTTTAAGAGCTATGCTGGAAACAGCATA
MKRN2_1251.110	ACAGTACGTGTGATTGCAAT	GTGGAAAGGACGAAACACCG	GTTTAAGAGCTATGCTGGAAACAGCATA	GTGGAAAGGACGAAACACCGACAGTACGTGTGATTGCAATGTTTAAGAGCTATGCTGGAAACAGCATA
MKRN2_1251.53	CGTACTGTTTGTCCTGCATC	GTGGAAAGGACGAAACACCG	GTTTAAGAGCTATGCTGGAAACAGCATA	GTGGAAAGGACGAAACACCGCGTACTGTTTGTCCTGCATCGTTTAAGAGCTATGCTGGAAACAGCATA
MKRN2_1251.54	GTTTGTCCTGCATCCGGCAG	GTGGAAAGGACGAAACACCG	GTTTAAGAGCTATGCTGGAAACAGCATA	GTGGAAAGGACGAAACACCGGTTTGTCCTGCATCCGGCAGGTTTAAGAGCTATGCTGGAAACAGCATA
MKRN2_1251.109	ACACCGCCACTGCCGGATGC	GTGGAAAGGACGAAACACCG	GTTTAAGAGCTATGCTGGAAACAGCATA	GTGGAAAGGACGAAACACCGACACCGCCACTGCCGGATGCGTTTAAGAGCTATGCTGGAAACAGCATA
MKRN2_1251.108	GTTTGGCACACCGCCACTGC	GTGGAAAGGACGAAACACCG	GTTTAAGAGCTATGCTGGAAACAGCATA	GTGGAAAGGACGAAACACCGGTTTGGCACACCGCCACTGCGTTTAAGAGCTATGCTGGAAACAGCATA
MKRN3_1524.35	TTATATACATGGGCAGTGCA	GTGGAAAGGACGAAACACCG	GTTTAAGAGCTATGCTGGAAACAGCATA	GTGGAAAGGACGAAACACCGTTATATACATGGGCAGTGCAGTTTAAGAGCTATGCTGGAAACAGCATA
MKRN3_1524.92	GAGACATATGCGACATGTGT	GTGGAAAGGACGAAACACCG	GTTTAAGAGCTATGCTGGAAACAGCATA	GTGGAAAGGACGAAACACCGGAGACATATGCGACATGTGTGTTTAAGAGCTATGCTGGAAACAGCATA
MKRN3_1524.184	TTTCTCGTGTGCTTCAATGC	GTGGAAAGGACGAAACACCG	GTTTAAGAGCTATGCTGGAAACAGCATA	GTGGAAAGGACGAAACACCGTTTCTCGTGTGCTTCAATGCGTTTAAGAGCTATGCTGGAAACAGCATA
MKRN3_1524.182	TGCCAAAGCGGCGGTCATTG	GTGGAAAGGACGAAACACCG	GTTTAAGAGCTATGCTGGAAACAGCATA	GTGGAAAGGACGAAACACCGTGCCAAAGCGGCGGTCATTGGTTTAAGAGCTATGCTGGAAACAGCATA
MKRN3_1524.106	AACCCCAATGACCGCCGCTT	GTGGAAAGGACGAAACACCG	GTTTAAGAGCTATGCTGGAAACAGCATA	GTGGAAAGGACGAAACACCGAACCCCAATGACCGCCGCTTGTTTAAGAGCTATGCTGGAAACAGCATA
MKRN3_1524.177	ACAGAAGGAATGGTTGCAAT	GTGGAAAGGACGAAACACCG	GTTTAAGAGCTATGCTGGAAACAGCATA	GTGGAAAGGACGAAACACCGACAGAAGGAATGGTTGCAATGTTTAAGAGCTATGCTGGAAACAGCATA
MKRN3_1524.108	TCTGTATTAGGTGTATCCGC	GTGGAAAGGACGAAACACCG	GTTTAAGAGCTATGCTGGAAACAGCATA	GTGGAAAGGACGAAACACCGTCTGTATTAGGTGTATCCGCGTTTAAGAGCTATGCTGGAAACAGCATA
MKRN3_1524.173	GATCCTGTTCTCAAACTGTC	GTGGAAAGGACGAAACACCG	GTTTAAGAGCTATGCTGGAAACAGCATA	GTGGAAAGGACGAAACACCGGATCCTGTTCTCAAACTGTCGTTTAAGAGCTATGCTGGAAACAGCATA
MKRN3_1524.126	GCAGGTATTTTGCGGAAGGC	GTGGAAAGGACGAAACACCG	GTTTAAGAGCTATGCTGGAAACAGCATA	GTGGAAAGGACGAAACACCGGCAGGTATTTTGCGGAAGGCGTTTAAGAGCTATGCTGGAAACAGCATA
MNAT1_930.0	TGGACGATCAGGGTTGCCCT	GTGGAAAGGACGAAACACCG	GTTTAAGAGCTATGCTGGAAACAGCATA	GTGGAAAGGACGAAACACCGTGGACGATCAGGGTTGCCCTGTTTAAGAGCTATGCTGGAAACAGCATA
MNAT1_930.77	ATTTGGTGGTCTTACACCGA	GTGGAAAGGACGAAACACCG	GTTTAAGAGCTATGCTGGAAACAGCATA	GTGGAAAGGACGAAACACCGATTTGGTGGTCTTACACCGAGTTTAAGAGCTATGCTGGAAACAGCATA
MNAT1_930.76	TATTTGGTGGTCTTACACCG	GTGGAAAGGACGAAACACCG	GTTTAAGAGCTATGCTGGAAACAGCATA	GTGGAAAGGACGAAACACCGTATTTGGTGGTCTTACACCGGTTTAAGAGCTATGCTGGAAACAGCATA
MNAT1_930.75	GGAGGGGTTCCGATATTTGG	GTGGAAAGGACGAAACACCG	GTTTAAGAGCTATGCTGGAAACAGCATA	GTGGAAAGGACGAAACACCGGGAGGGGTTCCGATATTTGGGTTTAAGAGCTATGCTGGAAACAGCATA
MNAT1_930.74	CAAGGAGGGGTTCCGATATT	GTGGAAAGGACGAAACACCG	GTTTAAGAGCTATGCTGGAAACAGCATA	GTGGAAAGGACGAAACACCGCAAGGAGGGGTTCCGATATTGTTTAAGAGCTATGCTGGAAACAGCATA
MNAT1_930.71	ATTCACCATCAGCTTCAAGG	GTGGAAAGGACGAAACACCG	GTTTAAGAGCTATGCTGGAAACAGCATA	GTGGAAAGGACGAAACACCGATTCACCATCAGCTTCAAGGGTTTAAGAGCTATGCTGGAAACAGCATA
MNAT1_930.5	TTACTGTTTGTGAGAGGAGC	GTGGAAAGGACGAAACACCG	GTTTAAGAGCTATGCTGGAAACAGCATA	GTGGAAAGGACGAAACACCGTTACTGTTTGTGAGAGGAGCGTTTAAGAGCTATGCTGGAAACAGCATA
MNAT1_930.68	CTGAGTGGAGTACCACACTC	GTGGAAAGGACGAAACACCG	GTTTAAGAGCTATGCTGGAAACAGCATA	GTGGAAAGGACGAAACACCGCTGAGTGGAGTACCACACTCGTTTAAGAGCTATGCTGGAAACAGCATA
MNAT1_930.17	CTTGACCAACAATGTGGATT	GTGGAAAGGACGAAACACCG	GTTTAAGAGCTATGCTGGAAACAGCATA	GTGGAAAGGACGAAACACCGCTTGACCAACAATGTGGATTGTTTAAGAGCTATGCTGGAAACAGCATA
MNAT1_930.55	CGTCACTGGTTTTACAGGTT	GTGGAAAGGACGAAACACCG	GTTTAAGAGCTATGCTGGAAACAGCATA	GTGGAAAGGACGAAACACCGCGTCACTGGTTTTACAGGTTGTTTAAGAGCTATGCTGGAAACAGCATA
MNAT1_930.37	GCCTCACCACAGGACCTTGC	GTGGAAAGGACGAAACACCG	GTTTAAGAGCTATGCTGGAAACAGCATA	GTGGAAAGGACGAAACACCGGCCTCACCACAGGACCTTGCGTTTAAGAGCTATGCTGGAAACAGCATA
MUL1_1059.150	GTACACGGAGTACAGGGCGG	GTGGAAAGGACGAAACACCG	GTTTAAGAGCTATGCTGGAAACAGCATA	GTGGAAAGGACGAAACACCGGTACACGGAGTACAGGGCGGGTTTAAGAGCTATGCTGGAAACAGCATA
MUL1_1059.129	ACATCCACGCCATCCTCGTG	GTGGAAAGGACGAAACACCG	GTTTAAGAGCTATGCTGGAAACAGCATA	GTGGAAAGGACGAAACACCGACATCCACGCCATCCTCGTGGTTTAAGAGCTATGCTGGAAACAGCATA
MUL1_1059.122	CGGTGAAGGACTGAATCGAG	GTGGAAAGGACGAAACACCG	GTTTAAGAGCTATGCTGGAAACAGCATA	GTGGAAAGGACGAAACACCGCGGTGAAGGACTGAATCGAGGTTTAAGAGCTATGCTGGAAACAGCATA
MUL1_1059.49	AGGGGTTGGCGAACTGGTCC	GTGGAAAGGACGAAACACCG	GTTTAAGAGCTATGCTGGAAACAGCATA	GTGGAAAGGACGAAACACCGAGGGGTTGGCGAACTGGTCCGTTTAAGAGCTATGCTGGAAACAGCATA
MUL1_1059.88	GCTGCTCAGACACACTACAC	GTGGAAAGGACGAAACACCG	GTTTAAGAGCTATGCTGGAAACAGCATA	GTGGAAAGGACGAAACACCGGCTGCTCAGACACACTACACGTTTAAGAGCTATGCTGGAAACAGCATA
MUL1_1059.70	CTTCAAGTCCTGCGTCTTTC	GTGGAAAGGACGAAACACCG	GTTTAAGAGCTATGCTGGAAACAGCATA	GTGGAAAGGACGAAACACCGCTTCAAGTCCTGCGTCTTTCGTTTAAGAGCTATGCTGGAAACAGCATA
MUL1_1059.87	CCCACACTCCAGAAAGACGC	GTGGAAAGGACGAAACACCG	GTTTAAGAGCTATGCTGGAAACAGCATA	GTGGAAAGGACGAAACACCGCCCACACTCCAGAAAGACGCGTTTAAGAGCTATGCTGGAAACAGCATA
MUL1_1059.86	GGCGCGGTAGCACTCGGTGC	GTGGAAAGGACGAAACACCG	GTTTAAGAGCTATGCTGGAAACAGCATA	GTGGAAAGGACGAAACACCGGGCGCGGTAGCACTCGGTGCGTTTAAGAGCTATGCTGGAAACAGCATA
MUL1_1059.85	TGGCAAGGCGCGGTAGCACT	GTGGAAAGGACGAAACACCG	GTTTAAGAGCTATGCTGGAAACAGCATA	GTGGAAAGGACGAAACACCGTGGCAAGGCGCGGTAGCACTGTTTAAGAGCTATGCTGGAAACAGCATA
MUL1_1059.80	TCTGCAGATAGGGCACTTCT	GTGGAAAGGACGAAACACCG	GTTTAAGAGCTATGCTGGAAACAGCATA	GTGGAAAGGACGAAACACCGTCTGCAGATAGGGCACTTCTGTTTAAGAGCTATGCTGGAAACAGCATA
MUL1_1059.73	GAAGTGCCCTATCTGCAGAC	GTGGAAAGGACGAAACACCG	GTTTAAGAGCTATGCTGGAAACAGCATA	GTGGAAAGGACGAAACACCGGAAGTGCCCTATCTGCAGACGTTTAAGAGCTATGCTGGAAACAGCATA
MYCBP2_14037.166	GGTTGTGGTTCCGGAGAATC	GTGGAAAGGACGAAACACCG	GTTTAAGAGCTATGCTGGAAACAGCATA	GTGGAAAGGACGAAACACCGGGTTGTGGTTCCGGAGAATCGTTTAAGAGCTATGCTGGAAACAGCATA
MYCBP2_14037.199	CATTTGGTTATGGGCAGCAT	GTGGAAAGGACGAAACACCG	GTTTAAGAGCTATGCTGGAAACAGCATA	GTGGAAAGGACGAAACACCGCATTTGGTTATGGGCAGCATGTTTAAGAGCTATGCTGGAAACAGCATA
MYCBP2_14037.267	TCTTGCAGAGACTGATGTAT	GTGGAAAGGACGAAACACCG	GTTTAAGAGCTATGCTGGAAACAGCATA	GTGGAAAGGACGAAACACCGTCTTGCAGAGACTGATGTATGTTTAAGAGCTATGCTGGAAACAGCATA
MYCBP2_14037.344	AGTGAAAGGAACGTACACAA	GTGGAAAGGACGAAACACCG	GTTTAAGAGCTATGCTGGAAACAGCATA	GTGGAAAGGACGAAACACCGAGTGAAAGGAACGTACACAAGTTTAAGAGCTATGCTGGAAACAGCATA
MYCBP2_14037.1109	TGCCTATCTGCTCACTCTGA	GTGGAAAGGACGAAACACCG	GTTTAAGAGCTATGCTGGAAACAGCATA	GTGGAAAGGACGAAACACCGTGCCTATCTGCTCACTCTGAGTTTAAGAGCTATGCTGGAAACAGCATA
MYCBP2_14037.1075	GTCCGGCTCATACGTCCATC	GTGGAAAGGACGAAACACCG	GTTTAAGAGCTATGCTGGAAACAGCATA	GTGGAAAGGACGAAACACCGGTCCGGCTCATACGTCCATCGTTTAAGAGCTATGCTGGAAACAGCATA
MYCBP2_14037.1034	GACGTTGACCGTCCTCTCAA	GTGGAAAGGACGAAACACCG	GTTTAAGAGCTATGCTGGAAACAGCATA	GTGGAAAGGACGAAACACCGGACGTTGACCGTCCTCTCAAGTTTAAGAGCTATGCTGGAAACAGCATA
MYCBP2_14037.627	GTGGACAATTCCCGAGATCT	GTGGAAAGGACGAAACACCG	GTTTAAGAGCTATGCTGGAAACAGCATA	GTGGAAAGGACGAAACACCGGTGGACAATTCCCGAGATCTGTTTAAGAGCTATGCTGGAAACAGCATA
MYCBP2_14037.725	ATGTTTCACCGAAGCGCTCT	GTGGAAAGGACGAAACACCG	GTTTAAGAGCTATGCTGGAAACAGCATA	GTGGAAAGGACGAAACACCGATGTTTCACCGAAGCGCTCTGTTTAAGAGCTATGCTGGAAACAGCATA
MYCBP2_14037.792	TGGTGCTGCCGAGAGCGCTT	GTGGAAAGGACGAAACACCG	GTTTAAGAGCTATGCTGGAAACAGCATA	GTGGAAAGGACGAAACACCGTGGTGCTGCCGAGAGCGCTTGTTTAAGAGCTATGCTGGAAACAGCATA
MYCBP2_14037.789	CTCGCCGACAGCACTGTAAG	GTGGAAAGGACGAAACACCG	GTTTAAGAGCTATGCTGGAAACAGCATA	GTGGAAAGGACGAAACACCGCTCGCCGACAGCACTGTAAGGTTTAAGAGCTATGCTGGAAACAGCATA
MYCBP2_14037.728	GGCGAGTATTAGAAAATCGA	GTGGAAAGGACGAAACACCG	GTTTAAGAGCTATGCTGGAAACAGCATA	GTGGAAAGGACGAAACACCGGGCGAGTATTAGAAAATCGAGTTTAAGAGCTATGCTGGAAACAGCATA
MYCBP2_14037.730	AAAATCGATGGCTTGGCCCA	GTGGAAAGGACGAAACACCG	GTTTAAGAGCTATGCTGGAAACAGCATA	GTGGAAAGGACGAAACACCGAAAATCGATGGCTTGGCCCAGTTTAAGAGCTATGCTGGAAACAGCATA
MYCBP2_14037.731	CTTGGCCCAAGGATAACATT	GTGGAAAGGACGAAACACCG	GTTTAAGAGCTATGCTGGAAACAGCATA	GTGGAAAGGACGAAACACCGCTTGGCCCAAGGATAACATTGTTTAAGAGCTATGCTGGAAACAGCATA
MYLIP_1338.17	CTGCAGTTTACGGGTAGCAA	GTGGAAAGGACGAAACACCG	GTTTAAGAGCTATGCTGGAAACAGCATA	GTGGAAAGGACGAAACACCGCTGCAGTTTACGGGTAGCAAGTTTAAGAGCTATGCTGGAAACAGCATA
MYLIP_1338.145	TGTAGTCTCCAAACTTGGTC	GTGGAAAGGACGAAACACCG	GTTTAAGAGCTATGCTGGAAACAGCATA	GTGGAAAGGACGAAACACCGTGTAGTCTCCAAACTTGGTCGTTTAAGAGCTATGCTGGAAACAGCATA
MYLIP_1338.49	CATTCTGTGCGGGATAGCGA	GTGGAAAGGACGAAACACCG	GTTTAAGAGCTATGCTGGAAACAGCATA	GTGGAAAGGACGAAACACCGCATTCTGTGCGGGATAGCGAGTTTAAGAGCTATGCTGGAAACAGCATA
MYLIP_1338.61	TGTATATTTGACGGTCACCA	GTGGAAAGGACGAAACACCG	GTTTAAGAGCTATGCTGGAAACAGCATA	GTGGAAAGGACGAAACACCGTGTATATTTGACGGTCACCAGTTTAAGAGCTATGCTGGAAACAGCATA
MYLIP_1338.88	GCTGTGCATGGTGTGCTGCG	GTGGAAAGGACGAAACACCG	GTTTAAGAGCTATGCTGGAAACAGCATA	GTGGAAAGGACGAAACACCGGCTGTGCATGGTGTGCTGCGGTTTAAGAGCTATGCTGGAAACAGCATA
MYLIP_1338.89	GTGCATGGTGTGCTGCGAGG	GTGGAAAGGACGAAACACCG	GTTTAAGAGCTATGCTGGAAACAGCATA	GTGGAAAGGACGAAACACCGGTGCATGGTGTGCTGCGAGGGTTTAAGAGCTATGCTGGAAACAGCATA
MYLIP_1338.102	ACAGCACACAGTGTGGCCAC	GTGGAAAGGACGAAACACCG	GTTTAAGAGCTATGCTGGAAACAGCATA	GTGGAAAGGACGAAACACCGACAGCACACAGTGTGGCCACGTTTAAGAGCTATGCTGGAAACAGCATA
MYLIP_1338.97	TCCACACGCGACCTGCAGAC	GTGGAAAGGACGAAACACCG	GTTTAAGAGCTATGCTGGAAACAGCATA	GTGGAAAGGACGAAACACCGTCCACACGCGACCTGCAGACGTTTAAGAGCTATGCTGGAAACAGCATA
MYLIP_1338.96	CTCCACACGCGACCTGCAGA	GTGGAAAGGACGAAACACCG	GTTTAAGAGCTATGCTGGAAACAGCATA	GTGGAAAGGACGAAACACCGCTCCACACGCGACCTGCAGAGTTTAAGAGCTATGCTGGAAACAGCATA
MYLIP_1338.92	TCCCGTCTGCAGGTCGCGTG	GTGGAAAGGACGAAACACCG	GTTTAAGAGCTATGCTGGAAACAGCATA	GTGGAAAGGACGAAACACCGTCCCGTCTGCAGGTCGCGTGGTTTAAGAGCTATGCTGGAAACAGCATA
NEURL1_1725.20	CATCACCTTCAGCAACCGCC	GTGGAAAGGACGAAACACCG	GTTTAAGAGCTATGCTGGAAACAGCATA	GTGGAAAGGACGAAACACCGCATCACCTTCAGCAACCGCCGTTTAAGAGCTATGCTGGAAACAGCATA
NEURL1_1725.38	AGGGCAACATCATCGCATTC	GTGGAAAGGACGAAACACCG	GTTTAAGAGCTATGCTGGAAACAGCATA	GTGGAAAGGACGAAACACCGAGGGCAACATCATCGCATTCGTTTAAGAGCTATGCTGGAAACAGCATA
NEURL1_1725.83	CTTCGTCAAGGTCACGCGCT	GTGGAAAGGACGAAACACCG	GTTTAAGAGCTATGCTGGAAACAGCATA	GTGGAAAGGACGAAACACCGCTTCGTCAAGGTCACGCGCTGTTTAAGAGCTATGCTGGAAACAGCATA
NEURL1_1725.98	TGGGCCGTGTGCCGCGTGCC	GTGGAAAGGACGAAACACCG	GTTTAAGAGCTATGCTGGAAACAGCATA	GTGGAAAGGACGAAACACCGTGGGCCGTGTGCCGCGTGCCGTTTAAGAGCTATGCTGGAAACAGCATA
NEURL1_1725.131	CACCATTTGCTATGAACACG	GTGGAAAGGACGAAACACCG	GTTTAAGAGCTATGCTGGAAACAGCATA	GTGGAAAGGACGAAACACCGCACCATTTGCTATGAACACGGTTTAAGAGCTATGCTGGAAACAGCATA
NEURL1_1725.132	CATTTGCTATGAACACGCGG	GTGGAAAGGACGAAACACCG	GTTTAAGAGCTATGCTGGAAACAGCATA	GTGGAAAGGACGAAACACCGCATTTGCTATGAACACGCGGGTTTAAGAGCTATGCTGGAAACAGCATA
NEURL1_1725.150	GCAGGCCACAGGCGTAGCAG	GTGGAAAGGACGAAACACCG	GTTTAAGAGCTATGCTGGAAACAGCATA	GTGGAAAGGACGAAACACCGGCAGGCCACAGGCGTAGCAGGTTTAAGAGCTATGCTGGAAACAGCATA
NEURL1_1725.149	CTTCTTGAGGCGCAGGCCAC	GTGGAAAGGACGAAACACCG	GTTTAAGAGCTATGCTGGAAACAGCATA	GTGGAAAGGACGAAACACCGCTTCTTGAGGCGCAGGCCACGTTTAAGAGCTATGCTGGAAACAGCATA
NEURL1_1725.148	GCAGAGCCTTCTTGAGGCGC	GTGGAAAGGACGAAACACCG	GTTTAAGAGCTATGCTGGAAACAGCATA	GTGGAAAGGACGAAACACCGGCAGAGCCTTCTTGAGGCGCGTTTAAGAGCTATGCTGGAAACAGCATA
NEURL1_1725.145	TGATGGGGCGGCGGCAGATG	GTGGAAAGGACGAAACACCG	GTTTAAGAGCTATGCTGGAAACAGCATA	GTGGAAAGGACGAAACACCGTGATGGGGCGGCGGCAGATGGTTTAAGAGCTATGCTGGAAACAGCATA
NEURL1_1725.142	TGATGTCCTTGATGGGGCGG	GTGGAAAGGACGAAACACCG	GTTTAAGAGCTATGCTGGAAACAGCATA	GTGGAAAGGACGAAACACCGTGATGTCCTTGATGGGGCGGGTTTAAGAGCTATGCTGGAAACAGCATA
NEURL1B_1668.323	GCAGAAGCTGTTGCGCCGTG	GTGGAAAGGACGAAACACCG	GTTTAAGAGCTATGCTGGAAACAGCATA	GTGGAAAGGACGAAACACCGGCAGAAGCTGTTGCGCCGTGGTTTAAGAGCTATGCTGGAAACAGCATA
NEURL1B_1668.27	TGGAGCGGCGCGCTGCGCTT	GTGGAAAGGACGAAACACCG	GTTTAAGAGCTATGCTGGAAACAGCATA	GTGGAAAGGACGAAACACCGTGGAGCGGCGCGCTGCGCTTGTTTAAGAGCTATGCTGGAAACAGCATA
NEURL1B_1668.242	TGCGCAGGCCACTTTGCGGT	GTGGAAAGGACGAAACACCG	GTTTAAGAGCTATGCTGGAAACAGCATA	GTGGAAAGGACGAAACACCGTGCGCAGGCCACTTTGCGGTGTTTAAGAGCTATGCTGGAAACAGCATA
NEURL1B_1668.224	CGTTGGGCCGTAGCACGCCC	GTGGAAAGGACGAAACACCG	GTTTAAGAGCTATGCTGGAAACAGCATA	GTGGAAAGGACGAAACACCGCGTTGGGCCGTAGCACGCCCGTTTAAGAGCTATGCTGGAAACAGCATA
NEURL1B_1668.137	CACGGTGTGCTTCGATGGCG	GTGGAAAGGACGAAACACCG	GTTTAAGAGCTATGCTGGAAACAGCATA	GTGGAAAGGACGAAACACCGCACGGTGTGCTTCGATGGCGGTTTAAGAGCTATGCTGGAAACAGCATA
NEURL1B_1668.139	CTTCGATGGCGAGGTGGACA	GTGGAAAGGACGAAACACCG	GTTTAAGAGCTATGCTGGAAACAGCATA	GTGGAAAGGACGAAACACCGCTTCGATGGCGAGGTGGACAGTTTAAGAGCTATGCTGGAAACAGCATA
NEURL1B_1668.160	TGAGCCGCAGGCCGCAGCTG	GTGGAAAGGACGAAACACCG	GTTTAAGAGCTATGCTGGAAACAGCATA	GTGGAAAGGACGAAACACCGTGAGCCGCAGGCCGCAGCTGGTTTAAGAGCTATGCTGGAAACAGCATA
NEURL1B_1668.159	GGGCCTGTCGCTTGAGCCGC	GTGGAAAGGACGAAACACCG	GTTTAAGAGCTATGCTGGAAACAGCATA	GTGGAAAGGACGAAACACCGGGGCCTGTCGCTTGAGCCGCGTTTAAGAGCTATGCTGGAAACAGCATA
NEURL1B_1668.145	GCGGCTCAAGCGACAGGCCC	GTGGAAAGGACGAAACACCG	GTTTAAGAGCTATGCTGGAAACAGCATA	GTGGAAAGGACGAAACACCGGCGGCTCAAGCGACAGGCCCGTTTAAGAGCTATGCTGGAAACAGCATA
NEURL1B_1668.155	TGATGGGCCGCCGGCAGATG	GTGGAAAGGACGAAACACCG	GTTTAAGAGCTATGCTGGAAACAGCATA	GTGGAAAGGACGAAACACCGTGATGGGCCGCCGGCAGATGGTTTAAGAGCTATGCTGGAAACAGCATA
NEURL1B_1668.153	CTTGATGGGCCGCCGGCAGA	GTGGAAAGGACGAAACACCG	GTTTAAGAGCTATGCTGGAAACAGCATA	GTGGAAAGGACGAAACACCGCTTGATGGGCCGCCGGCAGAGTTTAAGAGCTATGCTGGAAACAGCATA
NEURL3_789.151	CAGACGCACCTGTGCGCCCT	GTGGAAAGGACGAAACACCG	GTTTAAGAGCTATGCTGGAAACAGCATA	GTGGAAAGGACGAAACACCGCAGACGCACCTGTGCGCCCTGTTTAAGAGCTATGCTGGAAACAGCATA
NEURL3_789.11	ACGGCATCGTGTTCAGCCAG	GTGGAAAGGACGAAACACCG	GTTTAAGAGCTATGCTGGAAACAGCATA	GTGGAAAGGACGAAACACCGACGGCATCGTGTTCAGCCAGGTTTAAGAGCTATGCTGGAAACAGCATA
NEURL3_789.24	TGGTGCGGCGGCCTCCGCGT	GTGGAAAGGACGAAACACCG	GTTTAAGAGCTATGCTGGAAACAGCATA	GTGGAAAGGACGAAACACCGTGGTGCGGCGGCCTCCGCGTGTTTAAGAGCTATGCTGGAAACAGCATA
NEURL3_789.91	GCAGGGCACAAGGCGGGTGT	GTGGAAAGGACGAAACACCG	GTTTAAGAGCTATGCTGGAAACAGCATA	GTGGAAAGGACGAAACACCGGCAGGGCACAAGGCGGGTGTGTTTAAGAGCTATGCTGGAAACAGCATA
NEURL3_789.87	CAGAAGTATGTGTGGCCGCA	GTGGAAAGGACGAAACACCG	GTTTAAGAGCTATGCTGGAAACAGCATA	GTGGAAAGGACGAAACACCGCAGAAGTATGTGTGGCCGCAGTTTAAGAGCTATGCTGGAAACAGCATA
NEURL3_789.84	CGTATCGCTGAAGACCCGCC	GTGGAAAGGACGAAACACCG	GTTTAAGAGCTATGCTGGAAACAGCATA	GTGGAAAGGACGAAACACCGCGTATCGCTGAAGACCCGCCGTTTAAGAGCTATGCTGGAAACAGCATA
NEURL3_789.64	CTGGCGGGTCTTCAGCGATA	GTGGAAAGGACGAAACACCG	GTTTAAGAGCTATGCTGGAAACAGCATA	GTGGAAAGGACGAAACACCGCTGGCGGGTCTTCAGCGATAGTTTAAGAGCTATGCTGGAAACAGCATA
NEURL3_789.82	CTATCTGCCAGCGGCACACA	GTGGAAAGGACGAAACACCG	GTTTAAGAGCTATGCTGGAAACAGCATA	GTGGAAAGGACGAAACACCGCTATCTGCCAGCGGCACACAGTTTAAGAGCTATGCTGGAAACAGCATA
NFXL1_2736.203	TCACAACTGTCTCCACAAGT	GTGGAAAGGACGAAACACCG	GTTTAAGAGCTATGCTGGAAACAGCATA	GTGGAAAGGACGAAACACCGTCACAACTGTCTCCACAAGTGTTTAAGAGCTATGCTGGAAACAGCATA
NFXL1_2736.75	GTGGAAAAGCATTGTCGCTG	GTGGAAAGGACGAAACACCG	GTTTAAGAGCTATGCTGGAAACAGCATA	GTGGAAAGGACGAAACACCGGTGGAAAAGCATTGTCGCTGGTTTAAGAGCTATGCTGGAAACAGCATA
NFXL1_2736.68	TGTGGAGAATGTCCTCGATC	GTGGAAAGGACGAAACACCG	GTTTAAGAGCTATGCTGGAAACAGCATA	GTGGAAAGGACGAAACACCGTGTGGAGAATGTCCTCGATCGTTTAAGAGCTATGCTGGAAACAGCATA
NFXL1_2736.73	TGTTCACAGCGTTGTCACCG	GTGGAAAGGACGAAACACCG	GTTTAAGAGCTATGCTGGAAACAGCATA	GTGGAAAGGACGAAACACCGTGTTCACAGCGTTGTCACCGGTTTAAGAGCTATGCTGGAAACAGCATA
NFXL1_2736.79	CAAAACTGTGGACGGACTTT	GTGGAAAGGACGAAACACCG	GTTTAAGAGCTATGCTGGAAACAGCATA	GTGGAAAGGACGAAACACCGCAAAACTGTGGACGGACTTTGTTTAAGAGCTATGCTGGAAACAGCATA
NFXL1_2736.184	TGTGGTACGTTCTCGGCCAC	GTGGAAAGGACGAAACACCG	GTTTAAGAGCTATGCTGGAAACAGCATA	GTGGAAAGGACGAAACACCGTGTGGTACGTTCTCGGCCACGTTTAAGAGCTATGCTGGAAACAGCATA
NFXL1_2736.146	GGGTGACATCGCAAAATACA	GTGGAAAGGACGAAACACCG	GTTTAAGAGCTATGCTGGAAACAGCATA	GTGGAAAGGACGAAACACCGGGGTGACATCGCAAAATACAGTTTAAGAGCTATGCTGGAAACAGCATA
NFXL1_2736.134	CAGTTAAAGGGACATTCACC	GTGGAAAGGACGAAACACCG	GTTTAAGAGCTATGCTGGAAACAGCATA	GTGGAAAGGACGAAACACCGCAGTTAAAGGGACATTCACCGTTTAAGAGCTATGCTGGAAACAGCATA
NFXL1_2736.127	TTGTGGTTGTAGTGTTTGCC	GTGGAAAGGACGAAACACCG	GTTTAAGAGCTATGCTGGAAACAGCATA	GTGGAAAGGACGAAACACCGTTGTGGTTGTAGTGTTTGCCGTTTAAGAGCTATGCTGGAAACAGCATA
NHLRC1_1188.6	GCTTTGAGAAGTTTGGCCAC	GTGGAAAGGACGAAACACCG	GTTTAAGAGCTATGCTGGAAACAGCATA	GTGGAAAGGACGAAACACCGGCTTTGAGAAGTTTGGCCACGTTTAAGAGCTATGCTGGAAACAGCATA
NHLRC1_1188.218	GGCCGCAGGACAGGTTGCGC	GTGGAAAGGACGAAACACCG	GTTTAAGAGCTATGCTGGAAACAGCATA	GTGGAAAGGACGAAACACCGGGCCGCAGGACAGGTTGCGCGTTTAAGAGCTATGCTGGAAACAGCATA
NHLRC1_1188.9	CAACCTGTCCTGCGGCCACG	GTGGAAAGGACGAAACACCG	GTTTAAGAGCTATGCTGGAAACAGCATA	GTGGAAAGGACGAAACACCGCAACCTGTCCTGCGGCCACGGTTTAAGAGCTATGCTGGAAACAGCATA
NHLRC1_1188.211	AGTGCGCGGGTGCGCCAGGG	GTGGAAAGGACGAAACACCG	GTTTAAGAGCTATGCTGGAAACAGCATA	GTGGAAAGGACGAAACACCGAGTGCGCGGGTGCGCCAGGGGTTTAAGAGCTATGCTGGAAACAGCATA
NHLRC1_1188.13	CCTGGCGCACCCGCGCACTC	GTGGAAAGGACGAAACACCG	GTTTAAGAGCTATGCTGGAAACAGCATA	GTGGAAAGGACGAAACACCGCCTGGCGCACCCGCGCACTCGTTTAAGAGCTATGCTGGAAACAGCATA
NHLRC1_1188.203	CGGCAAGCTCGCCTGCAGAA	GTGGAAAGGACGAAACACCG	GTTTAAGAGCTATGCTGGAAACAGCATA	GTGGAAAGGACGAAACACCGCGGCAAGCTCGCCTGCAGAAGTTTAAGAGCTATGCTGGAAACAGCATA
NHLRC1_1188.31	CCTGGTCAACCCCACCGGAC	GTGGAAAGGACGAAACACCG	GTTTAAGAGCTATGCTGGAAACAGCATA	GTGGAAAGGACGAAACACCGCCTGGTCAACCCCACCGGACGTTTAAGAGCTATGCTGGAAACAGCATA
NHLRC1_1188.160	CGGCGTCAGTGACAACCACA	GTGGAAAGGACGAAACACCG	GTTTAAGAGCTATGCTGGAAACAGCATA	GTGGAAAGGACGAAACACCGCGGCGTCAGTGACAACCACAGTTTAAGAGCTATGCTGGAAACAGCATA
NHLRC1_1188.73	ACTTCGCGGAAGGGGTCCTT	GTGGAAAGGACGAAACACCG	GTTTAAGAGCTATGCTGGAAACAGCATA	GTGGAAAGGACGAAACACCGACTTCGCGGAAGGGGTCCTTGTTTAAGAGCTATGCTGGAAACAGCATA
NHLRC1_1188.119	TTCGGTACTGGAAACTCCTC	GTGGAAAGGACGAAACACCG	GTTTAAGAGCTATGCTGGAAACAGCATA	GTGGAAAGGACGAAACACCGTTCGGTACTGGAAACTCCTCGTTTAAGAGCTATGCTGGAAACAGCATA
NSMCE2_744.48	GGTGAAGTTGGTCTGACTTT	GTGGAAAGGACGAAACACCG	GTTTAAGAGCTATGCTGGAAACAGCATA	GTGGAAAGGACGAAACACCGGGTGAAGTTGGTCTGACTTTGTTTAAGAGCTATGCTGGAAACAGCATA
NSMCE2_744.40	TGGCGTCCTCTTCATAGGTG	GTGGAAAGGACGAAACACCG	GTTTAAGAGCTATGCTGGAAACAGCATA	GTGGAAAGGACGAAACACCGTGGCGTCCTCTTCATAGGTGGTTTAAGAGCTATGCTGGAAACAGCATA
NSMCE2_744.38	GGACTCAATCATGCGAACAA	GTGGAAAGGACGAAACACCG	GTTTAAGAGCTATGCTGGAAACAGCATA	GTGGAAAGGACGAAACACCGGGACTCAATCATGCGAACAAGTTTAAGAGCTATGCTGGAAACAGCATA
NSMCE2_744.23	TTGTTCGCATGATTGAGTCC	GTGGAAAGGACGAAACACCG	GTTTAAGAGCTATGCTGGAAACAGCATA	GTGGAAAGGACGAAACACCGTTGTTCGCATGATTGAGTCCGTTTAAGAGCTATGCTGGAAACAGCATA
NSMCE2_744.35	TGTGGCTACAGCCAATTTGA	GTGGAAAGGACGAAACACCG	GTTTAAGAGCTATGCTGGAAACAGCATA	GTGGAAAGGACGAAACACCGTGTGGCTACAGCCAATTTGAGTTTAAGAGCTATGCTGGAAACAGCATA
PARK2_1398.6	GGAGGTGGTTGCTAAGCGAC	GTGGAAAGGACGAAACACCG	GTTTAAGAGCTATGCTGGAAACAGCATA	GTGGAAAGGACGAAACACCGGGAGGTGGTTGCTAAGCGACGTTTAAGAGCTATGCTGGAAACAGCATA
PARK2_1398.170	TCCGACTATTTGTTGCGATC	GTGGAAAGGACGAAACACCG	GTTTAAGAGCTATGCTGGAAACAGCATA	GTGGAAAGGACGAAACACCGTCCGACTATTTGTTGCGATCGTTTAAGAGCTATGCTGGAAACAGCATA
PARK2_1398.149	ATAACACGCCCCCCATCTGC	GTGGAAAGGACGAAACACCG	GTTTAAGAGCTATGCTGGAAACAGCATA	GTGGAAAGGACGAAACACCGATAACACGCCCCCCATCTGCGTTTAAGAGCTATGCTGGAAACAGCATA
PARK2_1398.142	ACTTTCCTCTGGTCAGGCTC	GTGGAAAGGACGAAACACCG	GTTTAAGAGCTATGCTGGAAACAGCATA	GTGGAAAGGACGAAACACCGACTTTCCTCTGGTCAGGCTCGTTTAAGAGCTATGCTGGAAACAGCATA
PARK2_1398.83	GAGGAAAGTCACCTGCGAAG	GTGGAAAGGACGAAACACCG	GTTTAAGAGCTATGCTGGAAACAGCATA	GTGGAAAGGACGAAACACCGGAGGAAAGTCACCTGCGAAGGTTTAAGAGCTATGCTGGAAACAGCATA
PARK2_1398.87	TGCGAAGGGGGCAATGGCCT	GTGGAAAGGACGAAACACCG	GTTTAAGAGCTATGCTGGAAACAGCATA	GTGGAAAGGACGAAACACCGTGCGAAGGGGGCAATGGCCTGTTTAAGAGCTATGCTGGAAACAGCATA
PARK2_1398.92	TGTAAAGAAGCGTACCATGA	GTGGAAAGGACGAAACACCG	GTTTAAGAGCTATGCTGGAAACAGCATA	GTGGAAAGGACGAAACACCGTGTAAAGAAGCGTACCATGAGTTTAAGAGCTATGCTGGAAACAGCATA
PARK2_1398.97	CGATGAAAGAGCCGCCGAGC	GTGGAAAGGACGAAACACCG	GTTTAAGAGCTATGCTGGAAACAGCATA	GTGGAAAGGACGAAACACCGCGATGAAAGAGCCGCCGAGCGTTTAAGAGCTATGCTGGAAACAGCATA
PARK2_1398.123	TGGTACATGGCAGCGGGGAC	GTGGAAAGGACGAAACACCG	GTTTAAGAGCTATGCTGGAAACAGCATA	GTGGAAAGGACGAAACACCGTGGTACATGGCAGCGGGGACGTTTAAGAGCTATGCTGGAAACAGCATA
PARK2_1398.122	TCCACTGGTACATGGCAGCG	GTGGAAAGGACGAAACACCG	GTTTAAGAGCTATGCTGGAAACAGCATA	GTGGAAAGGACGAAACACCGTCCACTGGTACATGGCAGCGGTTTAAGAGCTATGCTGGAAACAGCATA
PARK2_1398.100	TCCCCGCTGCCATGTACCAG	GTGGAAAGGACGAAACACCG	GTTTAAGAGCTATGCTGGAAACAGCATA	GTGGAAAGGACGAAACACCGTCCCCGCTGCCATGTACCAGGTTTAAGAGCTATGCTGGAAACAGCATA
PARK2_1398.103	AGTGTCCGCAGCCCCAGTGC	GTGGAAAGGACGAAACACCG	GTTTAAGAGCTATGCTGGAAACAGCATA	GTGGAAAGGACGAAACACCGAGTGTCCGCAGCCCCAGTGCGTTTAAGAGCTATGCTGGAAACAGCATA
PARK2_1398.104	AGCCCCAGTGCAGGCTCGAG	GTGGAAAGGACGAAACACCG	GTTTAAGAGCTATGCTGGAAACAGCATA	GTGGAAAGGACGAAACACCGAGCCCCAGTGCAGGCTCGAGGTTTAAGAGCTATGCTGGAAACAGCATA
PCGF1_780.7	ATTGTTTGCTGCCTATGCGC	GTGGAAAGGACGAAACACCG	GTTTAAGAGCTATGCTGGAAACAGCATA	GTGGAAAGGACGAAACACCGATTGTTTGCTGCCTATGCGCGTTTAAGAGCTATGCTGGAAACAGCATA
PCGF1_780.88	CCACGAAGTAGCCGGCGCAT	GTGGAAAGGACGAAACACCG	GTTTAAGAGCTATGCTGGAAACAGCATA	GTGGAAAGGACGAAACACCGCCACGAAGTAGCCGGCGCATGTTTAAGAGCTATGCTGGAAACAGCATA
PCGF1_780.8	CCTATGCGCCGGCTACTTCG	GTGGAAAGGACGAAACACCG	GTTTAAGAGCTATGCTGGAAACAGCATA	GTGGAAAGGACGAAACACCGCCTATGCGCCGGCTACTTCGGTTTAAGAGCTATGCTGGAAACAGCATA
PCGF1_780.87	GGTGGCATCCACGAAGTAGC	GTGGAAAGGACGAAACACCG	GTTTAAGAGCTATGCTGGAAACAGCATA	GTGGAAAGGACGAAACACCGGGTGGCATCCACGAAGTAGCGTTTAAGAGCTATGCTGGAAACAGCATA
PCGF1_780.84	AGTATGAAGACACTCTGTGA	GTGGAAAGGACGAAACACCG	GTTTAAGAGCTATGCTGGAAACAGCATA	GTGGAAAGGACGAAACACCGAGTATGAAGACACTCTGTGAGTTTAAGAGCTATGCTGGAAACAGCATA
PCGF1_780.83	GGCAGTACTTGCTAGTTTGG	GTGGAAAGGACGAAACACCG	GTTTAAGAGCTATGCTGGAAACAGCATA	GTGGAAAGGACGAAACACCGGGCAGTACTTGCTAGTTTGGGTTTAAGAGCTATGCTGGAAACAGCATA
PCGF1_780.81	GGATCTTAATGTTGCACATG	GTGGAAAGGACGAAACACCG	GTTTAAGAGCTATGCTGGAAACAGCATA	GTGGAAAGGACGAAACACCGGGATCTTAATGTTGCACATGGTTTAAGAGCTATGCTGGAAACAGCATA
PCGF1_780.79	GTGGATCTTAATGTTGCACA	GTGGAAAGGACGAAACACCG	GTTTAAGAGCTATGCTGGAAACAGCATA	GTGGAAAGGACGAAACACCGGTGGATCTTAATGTTGCACAGTTTAAGAGCTATGCTGGAAACAGCATA
PCGF1_780.13	GCAGGACATCGTGTATAAGC	GTGGAAAGGACGAAACACCG	GTTTAAGAGCTATGCTGGAAACAGCATA	GTGGAAAGGACGAAACACCGGCAGGACATCGTGTATAAGCGTTTAAGAGCTATGCTGGAAACAGCATA
PCGF1_780.22	GACCGGGTCACCCAGCCCAC	GTGGAAAGGACGAAACACCG	GTTTAAGAGCTATGCTGGAAACAGCATA	GTGGAAAGGACGAAACACCGGACCGGGTCACCCAGCCCACGTTTAAGAGCTATGCTGGAAACAGCATA
PCGF1_780.30	GAGCTGAGGTACGCCATCTC	GTGGAAAGGACGAAACACCG	GTTTAAGAGCTATGCTGGAAACAGCATA	GTGGAAAGGACGAAACACCGGAGCTGAGGTACGCCATCTCGTTTAAGAGCTATGCTGGAAACAGCATA
PCGF2_1035.2	CCTCATGTGTGCCCTCTGCG	GTGGAAAGGACGAAACACCG	GTTTAAGAGCTATGCTGGAAACAGCATA	GTGGAAAGGACGAAACACCGCCTCATGTGTGCCCTCTGCGGTTTAAGAGCTATGCTGGAAACAGCATA
PCGF2_1035.4	TCATGTGTGCCCTCTGCGGG	GTGGAAAGGACGAAACACCG	GTTTAAGAGCTATGCTGGAAACAGCATA	GTGGAAAGGACGAAACACCGTCATGTGTGCCCTCTGCGGGGTTTAAGAGCTATGCTGGAAACAGCATA
PCGF2_1035.205	CGATGAAGTACCCCCCGCAG	GTGGAAAGGACGAAACACCG	GTTTAAGAGCTATGCTGGAAACAGCATA	GTGGAAAGGACGAAACACCGCGATGAAGTACCCCCCGCAGGTTTAAGAGCTATGCTGGAAACAGCATA
PCGF2_1035.5	CATCGACGCCACCACTATCG	GTGGAAAGGACGAAACACCG	GTTTAAGAGCTATGCTGGAAACAGCATA	GTGGAAAGGACGAAACACCGCATCGACGCCACCACTATCGGTTTAAGAGCTATGCTGGAAACAGCATA
PCGF2_1035.203	ATGCAGGCACTCCACGATAG	GTGGAAAGGACGAAACACCG	GTTTAAGAGCTATGCTGGAAACAGCATA	GTGGAAAGGACGAAACACCGATGCAGGCACTCCACGATAGGTTTAAGAGCTATGCTGGAAACAGCATA
PCGF2_1035.200	CTCCAGGTAGCGCACGATGC	GTGGAAAGGACGAAACACCG	GTTTAAGAGCTATGCTGGAAACAGCATA	GTGGAAAGGACGAAACACCGCTCCAGGTAGCGCACGATGCGTTTAAGAGCTATGCTGGAAACAGCATA
PCGF2_1035.198	ACACATGGGGCAGTATTTGT	GTGGAAAGGACGAAACACCG	GTTTAAGAGCTATGCTGGAAACAGCATA	GTGGAAAGGACGAAACACCGACACATGGGGCAGTATTTGTGTTTAAGAGCTATGCTGGAAACAGCATA
PCGF2_1035.12	TTGTCTACAAATTGGTCCCT	GTGGAAAGGACGAAACACCG	GTTTAAGAGCTATGCTGGAAACAGCATA	GTGGAAAGGACGAAACACCGTTGTCTACAAATTGGTCCCTGTTTAAGAGCTATGCTGGAAACAGCATA
PCGF2_1035.65	GTGTGAGTCAGTCAGCGACA	GTGGAAAGGACGAAACACCG	GTTTAAGAGCTATGCTGGAAACAGCATA	GTGGAAAGGACGAAACACCGGTGTGAGTCAGTCAGCGACAGTTTAAGAGCTATGCTGGAAACAGCATA
PCGF2_1035.93	GCCCCACTGGCTGTCGAAGG	GTGGAAAGGACGAAACACCG	GTTTAAGAGCTATGCTGGAAACAGCATA	GTGGAAAGGACGAAACACCGGCCCCACTGGCTGTCGAAGGGTTTAAGAGCTATGCTGGAAACAGCATA
PCGF3_729.97	GTACCCGCTGCACAGGCGGC	GTGGAAAGGACGAAACACCG	GTTTAAGAGCTATGCTGGAAACAGCATA	GTGGAAAGGACGAAACACCGGTACCCGCTGCACAGGCGGCGTTTAAGAGCTATGCTGGAAACAGCATA
PCGF3_729.95	CGATGAGGTACCCGCTGCAC	GTGGAAAGGACGAAACACCG	GTTTAAGAGCTATGCTGGAAACAGCATA	GTGGAAAGGACGAAACACCGCGATGAGGTACCCGCTGCACGTTTAAGAGCTATGCTGGAAACAGCATA
PCGF3_729.4	GTACCTCATCGACGCCACCA	GTGGAAAGGACGAAACACCG	GTTTAAGAGCTATGCTGGAAACAGCATA	GTGGAAAGGACGAAACACCGGTACCTCATCGACGCCACCAGTTTAAGAGCTATGCTGGAAACAGCATA
PCGF3_729.93	CAGACACTCGGTCACCGTGG	GTGGAAAGGACGAAACACCG	GTTTAAGAGCTATGCTGGAAACAGCATA	GTGGAAAGGACGAAACACCGCAGACACTCGGTCACCGTGGGTTTAAGAGCTATGCTGGAAACAGCATA
PCGF3_729.92	GTGCAGACACTCGGTCACCG	GTGGAAAGGACGAAACACCG	GTTTAAGAGCTATGCTGGAAACAGCATA	GTGGAAAGGACGAAACACCGGTGCAGACACTCGGTCACCGGTTTAAGAGCTATGCTGGAAACAGCATA
PCGF3_729.88	GGCAGGTGTTGTTCTCCTCC	GTGGAAAGGACGAAACACCG	GTTTAAGAGCTATGCTGGAAACAGCATA	GTGGAAAGGACGAAACACCGGGCAGGTGTTGTTCTCCTCCGTTTAAGAGCTATGCTGGAAACAGCATA
PCGF3_729.83	CTGGTGGATCACAATCCTGC	GTGGAAAGGACGAAACACCG	GTTTAAGAGCTATGCTGGAAACAGCATA	GTGGAAAGGACGAAACACCGCTGGTGGATCACAATCCTGCGTTTAAGAGCTATGCTGGAAACAGCATA
PCGF5_771.55	ATACCCTTTACAGATATAGC	GTGGAAAGGACGAAACACCG	GTTTAAGAGCTATGCTGGAAACAGCATA	GTGGAAAGGACGAAACACCGATACCCTTTACAGATATAGCGTTTAAGAGCTATGCTGGAAACAGCATA
PCGF5_771.3	GATCAAGCCAACAACAGTGA	GTGGAAAGGACGAAACACCG	GTTTAAGAGCTATGCTGGAAACAGCATA	GTGGAAAGGACGAAACACCGGATCAAGCCAACAACAGTGAGTTTAAGAGCTATGCTGGAAACAGCATA
PCGF5_771.54	AGGCATTCCGTCACTGTTGT	GTGGAAAGGACGAAACACCG	GTTTAAGAGCTATGCTGGAAACAGCATA	GTGGAAAGGACGAAACACCGAGGCATTCCGTCACTGTTGTGTTTAAGAGCTATGCTGGAAACAGCATA
PCGF5_771.4	AAGATAGCAATGATTGCCCA	GTGGAAAGGACGAAACACCG	GTTTAAGAGCTATGCTGGAAACAGCATA	GTGGAAAGGACGAAACACCGAAGATAGCAATGATTGCCCAGTTTAAGAGCTATGCTGGAAACAGCATA
PCGF5_771.5	AGCAATGATTGCCCAAGGTG	GTGGAAAGGACGAAACACCG	GTTTAAGAGCTATGCTGGAAACAGCATA	GTGGAAAGGACGAAACACCGAGCAATGATTGCCCAAGGTGGTTTAAGAGCTATGCTGGAAACAGCATA
PCGF5_771.51	GAACTTGGTTGCCACACCTT	GTGGAAAGGACGAAACACCG	GTTTAAGAGCTATGCTGGAAACAGCATA	GTGGAAAGGACGAAACACCGGAACTTGGTTGCCACACCTTGTTTAAGAGCTATGCTGGAAACAGCATA
PDZRN3_3201.504	TGTGGCACAGCGCGCACTTC	GTGGAAAGGACGAAACACCG	GTTTAAGAGCTATGCTGGAAACAGCATA	GTGGAAAGGACGAAACACCGTGTGGCACAGCGCGCACTTCGTTTAAGAGCTATGCTGGAAACAGCATA
PDZRN3_3201.4	CGCGCTGTGCCACAAGGTCC	GTGGAAAGGACGAAACACCG	GTTTAAGAGCTATGCTGGAAACAGCATA	GTGGAAAGGACGAAACACCGCGCGCTGTGCCACAAGGTCCGTTTAAGAGCTATGCTGGAAACAGCATA
PDZRN3_3201.502	GCGTGGTCAGCGGGTCCTCC	GTGGAAAGGACGAAACACCG	GTTTAAGAGCTATGCTGGAAACAGCATA	GTGGAAAGGACGAAACACCGGCGTGGTCAGCGGGTCCTCCGTTTAAGAGCTATGCTGGAAACAGCATA
PDZRN3_3201.6	GACCCGCTGACCACGCCGTG	GTGGAAAGGACGAAACACCG	GTTTAAGAGCTATGCTGGAAACAGCATA	GTGGAAAGGACGAAACACCGGACCCGCTGACCACGCCGTGGTTTAAGAGCTATGCTGGAAACAGCATA
PDZRN3_3201.497	CGCAGCCGGCGCAGAAGACG	GTGGAAAGGACGAAACACCG	GTTTAAGAGCTATGCTGGAAACAGCATA	GTGGAAAGGACGAAACACCGCGCAGCCGGCGCAGAAGACGGTTTAAGAGCTATGCTGGAAACAGCATA
PDZRN3_3201.9	CGCCGGCTGCGTGCTGCCCT	GTGGAAAGGACGAAACACCG	GTTTAAGAGCTATGCTGGAAACAGCATA	GTGGAAAGGACGAAACACCGCGCCGGCTGCGTGCTGCCCTGTTTAAGAGCTATGCTGGAAACAGCATA
PDZRN3_3201.18	AAGTGCGCGTACGCGACGCG	GTGGAAAGGACGAAACACCG	GTTTAAGAGCTATGCTGGAAACAGCATA	GTGGAAAGGACGAAACACCGAAGTGCGCGTACGCGACGCGGTTTAAGAGCTATGCTGGAAACAGCATA
PDZRN3_3201.446	CTTCACTGGATGATCCATCG	GTGGAAAGGACGAAACACCG	GTTTAAGAGCTATGCTGGAAACAGCATA	GTGGAAAGGACGAAACACCGCTTCACTGGATGATCCATCGGTTTAAGAGCTATGCTGGAAACAGCATA
PDZRN3_3201.79	GAGGCCTGCAAATTCATGAC	GTGGAAAGGACGAAACACCG	GTTTAAGAGCTATGCTGGAAACAGCATA	GTGGAAAGGACGAAACACCGGAGGCCTGCAAATTCATGACGTTTAAGAGCTATGCTGGAAACAGCATA
PDZRN3_3201.111	CGGACGATGAAGACGACATT	GTGGAAAGGACGAAACACCG	GTTTAAGAGCTATGCTGGAAACAGCATA	GTGGAAAGGACGAAACACCGCGGACGATGAAGACGACATTGTTTAAGAGCTATGCTGGAAACAGCATA
PDZRN4_3111.4	GGAGTGCAAACTGTGCGGCC	GTGGAAAGGACGAAACACCG	GTTTAAGAGCTATGCTGGAAACAGCATA	GTGGAAAGGACGAAACACCGGGAGTGCAAACTGTGCGGCCGTTTAAGAGCTATGCTGGAAACAGCATA
PDZRN4_3111.396	GTGCCCGCACGGCGTGCACA	GTGGAAAGGACGAAACACCG	GTTTAAGAGCTATGCTGGAAACAGCATA	GTGGAAAGGACGAAACACCGGTGCCCGCACGGCGTGCACAGTTTAAGAGCTATGCTGGAAACAGCATA
PDZRN4_3111.395	CGTGCCCGCACGGCGTGCAC	GTGGAAAGGACGAAACACCG	GTTTAAGAGCTATGCTGGAAACAGCATA	GTGGAAAGGACGAAACACCGCGTGCCCGCACGGCGTGCACGTTTAAGAGCTATGCTGGAAACAGCATA
PDZRN4_3111.6	AGCCCCTGTGCACGCCGTGC	GTGGAAAGGACGAAACACCG	GTTTAAGAGCTATGCTGGAAACAGCATA	GTGGAAAGGACGAAACACCGAGCCCCTGTGCACGCCGTGCGTTTAAGAGCTATGCTGGAAACAGCATA
PDZRN4_3111.392	TCCGCACCGCCCAGGGCAAC	GTGGAAAGGACGAAACACCG	GTTTAAGAGCTATGCTGGAAACAGCATA	GTGGAAAGGACGAAACACCGTCCGCACCGCCCAGGGCAACGTTTAAGAGCTATGCTGGAAACAGCATA
PDZRN4_3111.11	TGTTGCCCTGGGCGGTGCGG	GTGGAAAGGACGAAACACCG	GTTTAAGAGCTATGCTGGAAACAGCATA	GTGGAAAGGACGAAACACCGTGTTGCCCTGGGCGGTGCGGGTTTAAGAGCTATGCTGGAAACAGCATA
PDZRN4_3111.113	GGAAGCTTTTCGCAATGCCA	GTGGAAAGGACGAAACACCG	GTTTAAGAGCTATGCTGGAAACAGCATA	GTGGAAAGGACGAAACACCGGGAAGCTTTTCGCAATGCCAGTTTAAGAGCTATGCTGGAAACAGCATA
PDZRN4_3111.311	TTCTCGAATCCGGCCGTCTT	GTGGAAAGGACGAAACACCG	GTTTAAGAGCTATGCTGGAAACAGCATA	GTGGAAAGGACGAAACACCGTTCTCGAATCCGGCCGTCTTGTTTAAGAGCTATGCTGGAAACAGCATA
PDZRN4_3111.310	TCCGATCCCCTTCTCGAATC	GTGGAAAGGACGAAACACCG	GTTTAAGAGCTATGCTGGAAACAGCATA	GTGGAAAGGACGAAACACCGTCCGATCCCCTTCTCGAATCGTTTAAGAGCTATGCTGGAAACAGCATA
PEX10_1041.134	GCCTGCGCTCCTCCAGGCAC	GTGGAAAGGACGAAACACCG	GTTTAAGAGCTATGCTGGAAACAGCATA	GTGGAAAGGACGAAACACCGGCCTGCGCTCCTCCAGGCACGTTTAAGAGCTATGCTGGAAACAGCATA
PEX10_1041.204	GTATCCGCGATGGGTCCACC	GTGGAAAGGACGAAACACCG	GTTTAAGAGCTATGCTGGAAACAGCATA	GTGGAAAGGACGAAACACCGGTATCCGCGATGGGTCCACCGTTTAAGAGCTATGCTGGAAACAGCATA
PEX10_1041.42	CGACAGTGGGCGACCCTTGC	GTGGAAAGGACGAAACACCG	GTTTAAGAGCTATGCTGGAAACAGCATA	GTGGAAAGGACGAAACACCGCGACAGTGGGCGACCCTTGCGTTTAAGAGCTATGCTGGAAACAGCATA
PEX10_1041.173	AACATGTAGCCGCTGGAGGC	GTGGAAAGGACGAAACACCG	GTTTAAGAGCTATGCTGGAAACAGCATA	GTGGAAAGGACGAAACACCGAACATGTAGCCGCTGGAGGCGTTTAAGAGCTATGCTGGAAACAGCATA
PEX10_1041.137	CTCCAGGCACAGGGTGCACA	GTGGAAAGGACGAAACACCG	GTTTAAGAGCTATGCTGGAAACAGCATA	GTGGAAAGGACGAAACACCGCTCCAGGCACAGGGTGCACAGTTTAAGAGCTATGCTGGAAACAGCATA
PEX10_1041.132	GGCCGCAGGGCGTGGCTGTT	GTGGAAAGGACGAAACACCG	GTTTAAGAGCTATGCTGGAAACAGCATA	GTGGAAAGGACGAAACACCGGGCCGCAGGGCGTGGCTGTTGTTTAAGAGCTATGCTGGAAACAGCATA
PEX10_1041.107	CACCCAACAGCCACGCCCTG	GTGGAAAGGACGAAACACCG	GTTTAAGAGCTATGCTGGAAACAGCATA	GTGGAAAGGACGAAACACCGCACCCAACAGCCACGCCCTGGTTTAAGAGCTATGCTGGAAACAGCATA
PEX10_1041.128	CCAGCAGAACAGGTGGCCGC	GTGGAAAGGACGAAACACCG	GTTTAAGAGCTATGCTGGAAACAGCATA	GTGGAAAGGACGAAACACCGCCAGCAGAACAGGTGGCCGCGTTTAAGAGCTATGCTGGAAACAGCATA
PEX10_1041.110	GCTGGGAGTGCATCACCGCG	GTGGAAAGGACGAAACACCG	GTTTAAGAGCTATGCTGGAAACAGCATA	GTGGAAAGGACGAAACACCGGCTGGGAGTGCATCACCGCGGTTTAAGAGCTATGCTGGAAACAGCATA
PEX10_1041.124	GGGAACTTCTCCCGGCAGAG	GTGGAAAGGACGAAACACCG	GTTTAAGAGCTATGCTGGAAACAGCATA	GTGGAAAGGACGAAACACCGGGGAACTTCTCCCGGCAGAGGTTTAAGAGCTATGCTGGAAACAGCATA
PEX12_1080.16	TCTCAGAGATTGGCTAGTGC	GTGGAAAGGACGAAACACCG	GTTTAAGAGCTATGCTGGAAACAGCATA	GTGGAAAGGACGAAACACCGTCTCAGAGATTGGCTAGTGCGTTTAAGAGCTATGCTGGAAACAGCATA
PEX12_1080.96	ATCGTTTCCAGCGGGAAGAA	GTGGAAAGGACGAAACACCG	GTTTAAGAGCTATGCTGGAAACAGCATA	GTGGAAAGGACGAAACACCGATCGTTTCCAGCGGGAAGAAGTTTAAGAGCTATGCTGGAAACAGCATA
PEX12_1080.34	GCTAGGTCGACTGACAGTTC	GTGGAAAGGACGAAACACCG	GTTTAAGAGCTATGCTGGAAACAGCATA	GTGGAAAGGACGAAACACCGGCTAGGTCGACTGACAGTTCGTTTAAGAGCTATGCTGGAAACAGCATA
PEX12_1080.62	CCCGGGTTTTACGACACAGT	GTGGAAAGGACGAAACACCG	GTTTAAGAGCTATGCTGGAAACAGCATA	GTGGAAAGGACGAAACACCGCCCGGGTTTTACGACACAGTGTTTAAGAGCTATGCTGGAAACAGCATA
PEX12_1080.61	ACCCGGGTTTTACGACACAG	GTGGAAAGGACGAAACACCG	GTTTAAGAGCTATGCTGGAAACAGCATA	GTGGAAAGGACGAAACACCGACCCGGGTTTTACGACACAGGTTTAAGAGCTATGCTGGAAACAGCATA
PEX12_1080.47	GCCCACTGTGTCGTAAAACC	GTGGAAAGGACGAAACACCG	GTTTAAGAGCTATGCTGGAAACAGCATA	GTGGAAAGGACGAAACACCGGCCCACTGTGTCGTAAAACCGTTTAAGAGCTATGCTGGAAACAGCATA
PEX12_1080.48	CCCACTGTGTCGTAAAACCC	GTGGAAAGGACGAAACACCG	GTTTAAGAGCTATGCTGGAAACAGCATA	GTGGAAAGGACGAAACACCGCCCACTGTGTCGTAAAACCCGTTTAAGAGCTATGCTGGAAACAGCATA
PEX12_1080.49	GATACTGTTCTTGCCACCTC	GTGGAAAGGACGAAACACCG	GTTTAAGAGCTATGCTGGAAACAGCATA	GTGGAAAGGACGAAACACCGGATACTGTTCTTGCCACCTCGTTTAAGAGCTATGCTGGAAACAGCATA
PEX12_1080.57	GTAACAAAACACATAGCCAG	GTGGAAAGGACGAAACACCG	GTTTAAGAGCTATGCTGGAAACAGCATA	GTGGAAAGGACGAAACACCGGTAACAAAACACATAGCCAGGTTTAAGAGCTATGCTGGAAACAGCATA
PEX2_918.70	TCAAAGCGAGCTAACAGCCC	GTGGAAAGGACGAAACACCG	GTTTAAGAGCTATGCTGGAAACAGCATA	GTGGAAAGGACGAAACACCGTCAAAGCGAGCTAACAGCCCGTTTAAGAGCTATGCTGGAAACAGCATA
PEX2_918.16	CTGTTTGTACAATTGGTGGC	GTGGAAAGGACGAAACACCG	GTTTAAGAGCTATGCTGGAAACAGCATA	GTGGAAAGGACGAAACACCGCTGTTTGTACAATTGGTGGCGTTTAAGAGCTATGCTGGAAACAGCATA
PEX2_918.27	ACTTTGACAGAACGTCTCCT	GTGGAAAGGACGAAACACCG	GTTTAAGAGCTATGCTGGAAACAGCATA	GTGGAAAGGACGAAACACCGACTTTGACAGAACGTCTCCTGTTTAAGAGCTATGCTGGAAACAGCATA
PEX2_918.37	AATGCGCTCTATGTGGAGAG	GTGGAAAGGACGAAACACCG	GTTTAAGAGCTATGCTGGAAACAGCATA	GTGGAAAGGACGAAACACCGAATGCGCTCTATGTGGAGAGGTTTAAGAGCTATGCTGGAAACAGCATA
PEX2_918.47	CCTATGGTGTGAGGCATGGT	GTGGAAAGGACGAAACACCG	GTTTAAGAGCTATGCTGGAAACAGCATA	GTGGAAAGGACGAAACACCGCCTATGGTGTGAGGCATGGTGTTTAAGAGCTATGCTGGAAACAGCATA
PEX2_918.46	TCCTATGGTGTGAGGCATGG	GTGGAAAGGACGAAACACCG	GTTTAAGAGCTATGCTGGAAACAGCATA	GTGGAAAGGACGAAACACCGTCCTATGGTGTGAGGCATGGGTTTAAGAGCTATGCTGGAAACAGCATA
PEX2_918.43	GAAAATATGCTCACATCCTA	GTGGAAAGGACGAAACACCG	GTTTAAGAGCTATGCTGGAAACAGCATA	GTGGAAAGGACGAAACACCGGAAAATATGCTCACATCCTAGTTTAAGAGCTATGCTGGAAACAGCATA
PEX2_918.39	TACTTTACTTGTCCTAAGTG	GTGGAAAGGACGAAACACCG	GTTTAAGAGCTATGCTGGAAACAGCATA	GTGGAAAGGACGAAACACCGTACTTTACTTGTCCTAAGTGGTTTAAGAGCTATGCTGGAAACAGCATA
PHF7_1146.138	CGGGATCCCCAGGTTCTCGA	GTGGAAAGGACGAAACACCG	GTTTAAGAGCTATGCTGGAAACAGCATA	GTGGAAAGGACGAAACACCGCGGGATCCCCAGGTTCTCGAGTTTAAGAGCTATGCTGGAAACAGCATA
PHF7_1146.14	TATCTAGTAAGCTGCCTCAG	GTGGAAAGGACGAAACACCG	GTTTAAGAGCTATGCTGGAAACAGCATA	GTGGAAAGGACGAAACACCGTATCTAGTAAGCTGCCTCAGGTTTAAGAGCTATGCTGGAAACAGCATA
PHF7_1146.127	TTCTGAGGCACTGATCCTTC	GTGGAAAGGACGAAACACCG	GTTTAAGAGCTATGCTGGAAACAGCATA	GTGGAAAGGACGAAACACCGTTCTGAGGCACTGATCCTTCGTTTAAGAGCTATGCTGGAAACAGCATA
PHF7_1146.101	CCTTGTTCATACAGACAGAT	GTGGAAAGGACGAAACACCG	GTTTAAGAGCTATGCTGGAAACAGCATA	GTGGAAAGGACGAAACACCGCCTTGTTCATACAGACAGATGTTTAAGAGCTATGCTGGAAACAGCATA
PHF7_1146.99	CGCATGTAGCACACAGAATG	GTGGAAAGGACGAAACACCG	GTTTAAGAGCTATGCTGGAAACAGCATA	GTGGAAAGGACGAAACACCGCGCATGTAGCACACAGAATGGTTTAAGAGCTATGCTGGAAACAGCATA
PHF7_1146.53	TGTGCTACATGCGGATCCCA	GTGGAAAGGACGAAACACCG	GTTTAAGAGCTATGCTGGAAACAGCATA	GTGGAAAGGACGAAACACCGTGTGCTACATGCGGATCCCAGTTTAAGAGCTATGCTGGAAACAGCATA
PHF7_1146.54	GCGGATCCCACGGAACCCAC	GTGGAAAGGACGAAACACCG	GTTTAAGAGCTATGCTGGAAACAGCATA	GTGGAAAGGACGAAACACCGGCGGATCCCACGGAACCCACGTTTAAGAGCTATGCTGGAAACAGCATA
PHF7_1146.116	CTTGACTACAACACGGGCTC	GTGGAAAGGACGAAACACCG	GTTTAAGAGCTATGCTGGAAACAGCATA	GTGGAAAGGACGAAACACCGCTTGACTACAACACGGGCTCGTTTAAGAGCTATGCTGGAAACAGCATA
PHF7_1146.114	TAGATGGCTTGACTACAACA	GTGGAAAGGACGAAACACCG	GTTTAAGAGCTATGCTGGAAACAGCATA	GTGGAAAGGACGAAACACCGTAGATGGCTTGACTACAACAGTTTAAGAGCTATGCTGGAAACAGCATA
PHF7_1146.113	TATGCACTTGCGGTGGTAGA	GTGGAAAGGACGAAACACCG	GTTTAAGAGCTATGCTGGAAACAGCATA	GTGGAAAGGACGAAACACCGTATGCACTTGCGGTGGTAGAGTTTAAGAGCTATGCTGGAAACAGCATA
PHF7_1146.110	GAAATGCTTTGCTGATGTGT	GTGGAAAGGACGAAACACCG	GTTTAAGAGCTATGCTGGAAACAGCATA	GTGGAAAGGACGAAACACCGGAAATGCTTTGCTGATGTGTGTTTAAGAGCTATGCTGGAAACAGCATA
PHF7_1146.108	TCTTTTCGATTGTTACACTG	GTGGAAAGGACGAAACACCG	GTTTAAGAGCTATGCTGGAAACAGCATA	GTGGAAAGGACGAAACACCGTCTTTTCGATTGTTACACTGGTTTAAGAGCTATGCTGGAAACAGCATA
PHRF1_4950.42	CAGGGGAAACTGGAAGCCGC	GTGGAAAGGACGAAACACCG	GTTTAAGAGCTATGCTGGAAACAGCATA	GTGGAAAGGACGAAACACCGCAGGGGAAACTGGAAGCCGCGTTTAAGAGCTATGCTGGAAACAGCATA
PHRF1_4950.1068	CTGAATGCGTTGAGACAGAT	GTGGAAAGGACGAAACACCG	GTTTAAGAGCTATGCTGGAAACAGCATA	GTGGAAAGGACGAAACACCGCTGAATGCGTTGAGACAGATGTTTAAGAGCTATGCTGGAAACAGCATA
PHRF1_4950.44	CGCATTCAGAGACCAGGCCG	GTGGAAAGGACGAAACACCG	GTTTAAGAGCTATGCTGGAAACAGCATA	GTGGAAAGGACGAAACACCGCGCATTCAGAGACCAGGCCGGTTTAAGAGCTATGCTGGAAACAGCATA
PHRF1_4950.1067	TCTCCGGCGTCCCCACGGCC	GTGGAAAGGACGAAACACCG	GTTTAAGAGCTATGCTGGAAACAGCATA	GTGGAAAGGACGAAACACCGTCTCCGGCGTCCCCACGGCCGTTTAAGAGCTATGCTGGAAACAGCATA
PHRF1_4950.1066	ACAGTTCTCCGGCGTCCCCA	GTGGAAAGGACGAAACACCG	GTTTAAGAGCTATGCTGGAAACAGCATA	GTGGAAAGGACGAAACACCGACAGTTCTCCGGCGTCCCCAGTTTAAGAGCTATGCTGGAAACAGCATA
PHRF1_4950.1062	ACCATTCGACAATGCAGTCC	GTGGAAAGGACGAAACACCG	GTTTAAGAGCTATGCTGGAAACAGCATA	GTGGAAAGGACGAAACACCGACCATTCGACAATGCAGTCCGTTTAAGAGCTATGCTGGAAACAGCATA
PHRF1_4950.49	GCCTGGACTGCATTGTCGAA	GTGGAAAGGACGAAACACCG	GTTTAAGAGCTATGCTGGAAACAGCATA	GTGGAAAGGACGAAACACCGGCCTGGACTGCATTGTCGAAGTTTAAGAGCTATGCTGGAAACAGCATA
PHRF1_4950.60	GTGCGGCAGGAGCGACCGTG	GTGGAAAGGACGAAACACCG	GTTTAAGAGCTATGCTGGAAACAGCATA	GTGGAAAGGACGAAACACCGGTGCGGCAGGAGCGACCGTGGTTTAAGAGCTATGCTGGAAACAGCATA
PHRF1_4950.64	CTCTGCGACGGCTGCGATGC	GTGGAAAGGACGAAACACCG	GTTTAAGAGCTATGCTGGAAACAGCATA	GTGGAAAGGACGAAACACCGCTCTGCGACGGCTGCGATGCGTTTAAGAGCTATGCTGGAAACAGCATA
PIAS1_1956.3	CAAGTACTGTTGGGCTACGC	GTGGAAAGGACGAAACACCG	GTTTAAGAGCTATGCTGGAAACAGCATA	GTGGAAAGGACGAAACACCGCAAGTACTGTTGGGCTACGCGTTTAAGAGCTATGCTGGAAACAGCATA
PIAS1_1956.11	TTAAGGAACTCTATAGGCGG	GTGGAAAGGACGAAACACCG	GTTTAAGAGCTATGCTGGAAACAGCATA	GTGGAAAGGACGAAACACCGTTAAGGAACTCTATAGGCGGGTTTAAGAGCTATGCTGGAAACAGCATA
PIAS1_1956.168	GTGATCTTCTTGTGGACAAC	GTGGAAAGGACGAAACACCG	GTTTAAGAGCTATGCTGGAAACAGCATA	GTGGAAAGGACGAAACACCGGTGATCTTCTTGTGGACAACGTTTAAGAGCTATGCTGGAAACAGCATA
PIAS1_1956.155	GTGATATTAATTGGTCGGCT	GTGGAAAGGACGAAACACCG	GTTTAAGAGCTATGCTGGAAACAGCATA	GTGGAAAGGACGAAACACCGGTGATATTAATTGGTCGGCTGTTTAAGAGCTATGCTGGAAACAGCATA
PIAS1_1956.39	TGCGGCTGACAATTCCGTGT	GTGGAAAGGACGAAACACCG	GTTTAAGAGCTATGCTGGAAACAGCATA	GTGGAAAGGACGAAACACCGTGCGGCTGACAATTCCGTGTGTTTAAGAGCTATGCTGGAAACAGCATA
PIAS1_1956.140	GAACATGTAAGGGCCCGACA	GTGGAAAGGACGAAACACCG	GTTTAAGAGCTATGCTGGAAACAGCATA	GTGGAAAGGACGAAACACCGGAACATGTAAGGGCCCGACAGTTTAAGAGCTATGCTGGAAACAGCATA
PIAS1_1956.138	ATTGTAGATGAGAACATGTA	GTGGAAAGGACGAAACACCG	GTTTAAGAGCTATGCTGGAAACAGCATA	GTGGAAAGGACGAAACACCGATTGTAGATGAGAACATGTAGTTTAAGAGCTATGCTGGAAACAGCATA
PIAS1_1956.136	ATCACAGACAGGACAAACCC	GTGGAAAGGACGAAACACCG	GTTTAAGAGCTATGCTGGAAACAGCATA	GTGGAAAGGACGAAACACCGATCACAGACAGGACAAACCCGTTTAAGAGCTATGCTGGAAACAGCATA
PIAS1_1956.43	TTGTCCTGTCTGTGATAAGA	GTGGAAAGGACGAAACACCG	GTTTAAGAGCTATGCTGGAAACAGCATA	GTGGAAAGGACGAAACACCGTTGTCCTGTCTGTGATAAGAGTTTAAGAGCTATGCTGGAAACAGCATA
PIAS1_1956.100	CGTAAGGCATGGGTGTCATG	GTGGAAAGGACGAAACACCG	GTTTAAGAGCTATGCTGGAAACAGCATA	GTGGAAAGGACGAAACACCGCGTAAGGCATGGGTGTCATGGTTTAAGAGCTATGCTGGAAACAGCATA
PIAS1_1956.91	GGAAAAACCGAGACGAGTGT	GTGGAAAGGACGAAACACCG	GTTTAAGAGCTATGCTGGAAACAGCATA	GTGGAAAGGACGAAACACCGGGAAAAACCGAGACGAGTGTGTTTAAGAGCTATGCTGGAAACAGCATA
PIAS2_1866.187	AATGCAGCGCCCTCATCAGG	GTGGAAAGGACGAAACACCG	GTTTAAGAGCTATGCTGGAAACAGCATA	GTGGAAAGGACGAAACACCGAATGCAGCGCCCTCATCAGGGTTTAAGAGCTATGCTGGAAACAGCATA
PIAS2_1866.30	TATGCACCACCGCCTAAAAA	GTGGAAAGGACGAAACACCG	GTTTAAGAGCTATGCTGGAAACAGCATA	GTGGAAAGGACGAAACACCGTATGCACCACCGCCTAAAAAGTTTAAGAGCTATGCTGGAAACAGCATA
PIAS2_1866.123	TACAAGTCACTGCACGGCAT	GTGGAAAGGACGAAACACCG	GTTTAAGAGCTATGCTGGAAACAGCATA	GTGGAAAGGACGAAACACCGTACAAGTCACTGCACGGCATGTTTAAGAGCTATGCTGGAAACAGCATA
PIAS2_1866.122	GTACAAGTCACTGCACGGCA	GTGGAAAGGACGAAACACCG	GTTTAAGAGCTATGCTGGAAACAGCATA	GTGGAAAGGACGAAACACCGGTACAAGTCACTGCACGGCAGTTTAAGAGCTATGCTGGAAACAGCATA
PIAS2_1866.121	GATGTGTACAAGTCACTGCA	GTGGAAAGGACGAAACACCG	GTTTAAGAGCTATGCTGGAAACAGCATA	GTGGAAAGGACGAAACACCGGATGTGTACAAGTCACTGCAGTTTAAGAGCTATGCTGGAAACAGCATA
PIAS2_1866.44	TGAATGAGAAAAAGCCCACC	GTGGAAAGGACGAAACACCG	GTTTAAGAGCTATGCTGGAAACAGCATA	GTGGAAAGGACGAAACACCGTGAATGAGAAAAAGCCCACCGTTTAAGAGCTATGCTGGAAACAGCATA
PIAS2_1866.115	GCAGCTTTTTTGTCACACAC	GTGGAAAGGACGAAACACCG	GTTTAAGAGCTATGCTGGAAACAGCATA	GTGGAAAGGACGAAACACCGGCAGCTTTTTTGTCACACACGTTTAAGAGCTATGCTGGAAACAGCATA
PIAS3_1887.9	TGGACGGAAGCACGAGCTCC	GTGGAAAGGACGAAACACCG	GTTTAAGAGCTATGCTGGAAACAGCATA	GTGGAAAGGACGAAACACCGTGGACGGAAGCACGAGCTCCGTTTAAGAGCTATGCTGGAAACAGCATA
PIAS3_1887.335	CCAGGGGCCAACAGCGTTGG	GTGGAAAGGACGAAACACCG	GTTTAAGAGCTATGCTGGAAACAGCATA	GTGGAAAGGACGAAACACCGCCAGGGGCCAACAGCGTTGGGTTTAAGAGCTATGCTGGAAACAGCATA
PIAS3_1887.310	TCCCCATAGACTTCATAGAA	GTGGAAAGGACGAAACACCG	GTTTAAGAGCTATGCTGGAAACAGCATA	GTGGAAAGGACGAAACACCGTCCCCATAGACTTCATAGAAGTTTAAGAGCTATGCTGGAAACAGCATA
PIAS3_1887.29	CACTTCTAGCCAGCGGTTTG	GTGGAAAGGACGAAACACCG	GTTTAAGAGCTATGCTGGAAACAGCATA	GTGGAAAGGACGAAACACCGCACTTCTAGCCAGCGGTTTGGTTTAAGAGCTATGCTGGAAACAGCATA
PIAS3_1887.273	TCGGCCCCATTCTTGGTTGG	GTGGAAAGGACGAAACACCG	GTTTAAGAGCTATGCTGGAAACAGCATA	GTGGAAAGGACGAAACACCGTCGGCCCCATTCTTGGTTGGGTTTAAGAGCTATGCTGGAAACAGCATA
PIAS3_1887.257	CAGTGGCTGAGAGTCGAGCC	GTGGAAAGGACGAAACACCG	GTTTAAGAGCTATGCTGGAAACAGCATA	GTGGAAAGGACGAAACACCGCAGTGGCTGAGAGTCGAGCCGTTTAAGAGCTATGCTGGAAACAGCATA
PIAS3_1887.238	GGGCACGACAAGGGACAGTC	GTGGAAAGGACGAAACACCG	GTTTAAGAGCTATGCTGGAAACAGCATA	GTGGAAAGGACGAAACACCGGGGCACGACAAGGGACAGTCGTTTAAGAGCTATGCTGGAAACAGCATA
PIAS3_1887.237	CGCAGGTGAGGGCACGACAA	GTGGAAAGGACGAAACACCG	GTTTAAGAGCTATGCTGGAAACAGCATA	GTGGAAAGGACGAAACACCGCGCAGGTGAGGGCACGACAAGTTTAAGAGCTATGCTGGAAACAGCATA
PIAS3_1887.236	GCGCAGGTGAGGGCACGACA	GTGGAAAGGACGAAACACCG	GTTTAAGAGCTATGCTGGAAACAGCATA	GTGGAAAGGACGAAACACCGGCGCAGGTGAGGGCACGACAGTTTAAGAGCTATGCTGGAAACAGCATA
PIAS3_1887.232	AGCATCGAAGCTCTGCAGGT	GTGGAAAGGACGAAACACCG	GTTTAAGAGCTATGCTGGAAACAGCATA	GTGGAAAGGACGAAACACCGAGCATCGAAGCTCTGCAGGTGTTTAAGAGCTATGCTGGAAACAGCATA
PIAS3_1887.231	CAGCATCGAAGCTCTGCAGG	GTGGAAAGGACGAAACACCG	GTTTAAGAGCTATGCTGGAAACAGCATA	GTGGAAAGGACGAAACACCGCAGCATCGAAGCTCTGCAGGGTTTAAGAGCTATGCTGGAAACAGCATA
PIAS3_1887.230	GGGCAGCATCGAAGCTCTGC	GTGGAAAGGACGAAACACCG	GTTTAAGAGCTATGCTGGAAACAGCATA	GTGGAAAGGACGAAACACCGGGGCAGCATCGAAGCTCTGCGTTTAAGAGCTATGCTGGAAACAGCATA
PIAS3_1887.226	GGAGCCTTCTTGTCACACAC	GTGGAAAGGACGAAACACCG	GTTTAAGAGCTATGCTGGAAACAGCATA	GTGGAAAGGACGAAACACCGGGAGCCTTCTTGTCACACACGTTTAAGAGCTATGCTGGAAACAGCATA
PIAS4_1533.69	TGCGGCTCTCCGTGCCCTGC	GTGGAAAGGACGAAACACCG	GTTTAAGAGCTATGCTGGAAACAGCATA	GTGGAAAGGACGAAACACCGTGCGGCTCTCCGTGCCCTGCGTTTAAGAGCTATGCTGGAAACAGCATA
PIAS4_1533.299	TACTCCGGCCCACGAAACCC	GTGGAAAGGACGAAACACCG	GTTTAAGAGCTATGCTGGAAACAGCATA	GTGGAAAGGACGAAACACCGTACTCCGGCCCACGAAACCCGTTTAAGAGCTATGCTGGAAACAGCATA
PIAS4_1533.28	CTTCGCATTGACGCCAAGAC	GTGGAAAGGACGAAACACCG	GTTTAAGAGCTATGCTGGAAACAGCATA	GTGGAAAGGACGAAACACCGCTTCGCATTGACGCCAAGACGTTTAAGAGCTATGCTGGAAACAGCATA
PIAS4_1533.37	CCCGCCCAACATCGCTGTGA	GTGGAAAGGACGAAACACCG	GTTTAAGAGCTATGCTGGAAACAGCATA	GTGGAAAGGACGAAACACCGCCCGCCCAACATCGCTGTGAGTTTAAGAGCTATGCTGGAAACAGCATA
PIAS4_1533.186	GGCACAGGTCTCTGCCCGGC	GTGGAAAGGACGAAACACCG	GTTTAAGAGCTATGCTGGAAACAGCATA	GTGGAAAGGACGAAACACCGGGCACAGGTCTCTGCCCGGCGTTTAAGAGCTATGCTGGAAACAGCATA
PIAS4_1533.182	CGGCGTCGAAGCACTGCAGG	GTGGAAAGGACGAAACACCG	GTTTAAGAGCTATGCTGGAAACAGCATA	GTGGAAAGGACGAAACACCGCGGCGTCGAAGCACTGCAGGGTTTAAGAGCTATGCTGGAAACAGCATA
PIAS4_1533.181	AGACGGCGTCGAAGCACTGC	GTGGAAAGGACGAAACACCG	GTTTAAGAGCTATGCTGGAAACAGCATA	GTGGAAAGGACGAAACACCGAGACGGCGTCGAAGCACTGCGTTTAAGAGCTATGCTGGAAACAGCATA
PIAS4_1533.179	GCTTCTTCTCGTTCATCTGC	GTGGAAAGGACGAAACACCG	GTTTAAGAGCTATGCTGGAAACAGCATA	GTGGAAAGGACGAAACACCGGCTTCTTCTCGTTCATCTGCGTTTAAGAGCTATGCTGGAAACAGCATA
PIAS4_1533.71	TGAACGAGAAGAAGCCCACC	GTGGAAAGGACGAAACACCG	GTTTAAGAGCTATGCTGGAAACAGCATA	GTGGAAAGGACGAAACACCGTGAACGAGAAGAAGCCCACCGTTTAAGAGCTATGCTGGAAACAGCATA
PIAS4_1533.175	GGGCTGGCTTGTCGCACACG	GTGGAAAGGACGAAACACCG	GTTTAAGAGCTATGCTGGAAACAGCATA	GTGGAAAGGACGAAACACCGGGGCTGGCTTGTCGCACACGGTTTAAGAGCTATGCTGGAAACAGCATA
PJA1_1368.94	TGACGCTCTTCCCGAGATCC	GTGGAAAGGACGAAACACCG	GTTTAAGAGCTATGCTGGAAACAGCATA	GTGGAAAGGACGAAACACCGTGACGCTCTTCCCGAGATCCGTTTAAGAGCTATGCTGGAAACAGCATA
PJA1_1368.118	ACATATTCGCTACAGCAGAT	GTGGAAAGGACGAAACACCG	GTTTAAGAGCTATGCTGGAAACAGCATA	GTGGAAAGGACGAAACACCGACATATTCGCTACAGCAGATGTTTAAGAGCTATGCTGGAAACAGCATA
PJA1_1368.101	CTGTAGCGAATATGTGAAGG	GTGGAAAGGACGAAACACCG	GTTTAAGAGCTATGCTGGAAACAGCATA	GTGGAAAGGACGAAACACCGCTGTAGCGAATATGTGAAGGGTTTAAGAGCTATGCTGGAAACAGCATA
PJA1_1368.115	ACGGCTTGTGGAAATAGTGG	GTGGAAAGGACGAAACACCG	GTTTAAGAGCTATGCTGGAAACAGCATA	GTGGAAAGGACGAAACACCGACGGCTTGTGGAAATAGTGGGTTTAAGAGCTATGCTGGAAACAGCATA
PJA1_1368.113	AGATGGACACACACGGCTTG	GTGGAAAGGACGAAACACCG	GTTTAAGAGCTATGCTGGAAACAGCATA	GTGGAAAGGACGAAACACCGAGATGGACACACACGGCTTGGTTTAAGAGCTATGCTGGAAACAGCATA
PJA1_1368.109	GGAACATGCAGCGGCACACG	GTGGAAAGGACGAAACACCG	GTTTAAGAGCTATGCTGGAAACAGCATA	GTGGAAAGGACGAAACACCGGGAACATGCAGCGGCACACGGTTTAAGAGCTATGCTGGAAACAGCATA
PJA2_2127.104	ACTAGAAGAACGCTTAGCCC	GTGGAAAGGACGAAACACCG	GTTTAAGAGCTATGCTGGAAACAGCATA	GTGGAAAGGACGAAACACCGACTAGAAGAACGCTTAGCCCGTTTAAGAGCTATGCTGGAAACAGCATA
PJA2_2127.110	GGCCAATCCACCAGCTAGTA	GTGGAAAGGACGAAACACCG	GTTTAAGAGCTATGCTGGAAACAGCATA	GTGGAAAGGACGAAACACCGGGCCAATCCACCAGCTAGTAGTTTAAGAGCTATGCTGGAAACAGCATA
PJA2_2127.114	CTGTTGCAGTGAGTATATTA	GTGGAAAGGACGAAACACCG	GTTTAAGAGCTATGCTGGAAACAGCATA	GTGGAAAGGACGAAACACCGCTGTTGCAGTGAGTATATTAGTTTAAGAGCTATGCTGGAAACAGCATA
PJA2_2127.136	TTTGTGAAAGAAATGGTGAC	GTGGAAAGGACGAAACACCG	GTTTAAGAGCTATGCTGGAAACAGCATA	GTGGAAAGGACGAAACACCGTTTGTGAAAGAAATGGTGACGTTTAAGAGCTATGCTGGAAACAGCATA
PJA2_2127.115	ACAAACCTTGTGTCTCAATT	GTGGAAAGGACGAAACACCG	GTTTAAGAGCTATGCTGGAAACAGCATA	GTGGAAAGGACGAAACACCGACAAACCTTGTGTCTCAATTGTTTAAGAGCTATGCTGGAAACAGCATA
PJA2_2127.133	GGAAATGACGGCGGCACACA	GTGGAAAGGACGAAACACCG	GTTTAAGAGCTATGCTGGAAACAGCATA	GTGGAAAGGACGAAACACCGGGAAATGACGGCGGCACACAGTTTAAGAGCTATGCTGGAAACAGCATA
PJA2_2127.131	CCGCAGGTGGGAAATGACGG	GTGGAAAGGACGAAACACCG	GTTTAAGAGCTATGCTGGAAACAGCATA	GTGGAAAGGACGAAACACCGCCGCAGGTGGGAAATGACGGGTTTAAGAGCTATGCTGGAAACAGCATA
PJA2_2127.129	ATGCTTCAATAACCGCAGGT	GTGGAAAGGACGAAACACCG	GTTTAAGAGCTATGCTGGAAACAGCATA	GTGGAAAGGACGAAACACCGATGCTTCAATAACCGCAGGTGTTTAAGAGCTATGCTGGAAACAGCATA
PJA2_2127.127	GCAGATGCTTCAATAACCGC	GTGGAAAGGACGAAACACCG	GTTTAAGAGCTATGCTGGAAACAGCATA	GTGGAAAGGACGAAACACCGGCAGATGCTTCAATAACCGCGTTTAAGAGCTATGCTGGAAACAGCATA
PML_2649.480	TGGCTTCCGCCTGGCATTGC	GTGGAAAGGACGAAACACCG	GTTTAAGAGCTATGCTGGAAACAGCATA	GTGGAAAGGACGAAACACCGTGGCTTCCGCCTGGCATTGCGTTTAAGAGCTATGCTGGAAACAGCATA
PML_2649.479	TCGGGCACTTGGCTTCCGCC	GTGGAAAGGACGAAACACCG	GTTTAAGAGCTATGCTGGAAACAGCATA	GTGGAAAGGACGAAACACCGTCGGGCACTTGGCTTCCGCCGTTTAAGAGCTATGCTGGAAACAGCATA
PML_2649.478	AGGCAGCAGCTTCGGGCACT	GTGGAAAGGACGAAACACCG	GTTTAAGAGCTATGCTGGAAACAGCATA	GTGGAAAGGACGAAACACCGAGGCAGCAGCTTCGGGCACTGTTTAAGAGCTATGCTGGAAACAGCATA
PML_2649.11	CACGCTGTGCTCAGGATGCC	GTGGAAAGGACGAAACACCG	GTTTAAGAGCTATGCTGGAAACAGCATA	GTGGAAAGGACGAAACACCGCACGCTGTGCTCAGGATGCCGTTTAAGAGCTATGCTGGAAACAGCATA
PML_2649.14	TCAGGATGCCTGGAGGCGTC	GTGGAAAGGACGAAACACCG	GTTTAAGAGCTATGCTGGAAACAGCATA	GTGGAAAGGACGAAACACCGTCAGGATGCCTGGAGGCGTCGTTTAAGAGCTATGCTGGAAACAGCATA
PML_2649.474	ACTGCATGCCCGACGCCTCC	GTGGAAAGGACGAAACACCG	GTTTAAGAGCTATGCTGGAAACAGCATA	GTGGAAAGGACGAAACACCGACTGCATGCCCGACGCCTCCGTTTAAGAGCTATGCTGGAAACAGCATA
PML_2649.470	CACCTAGGGGCCAGGGCGCC	GTGGAAAGGACGAAACACCG	GTTTAAGAGCTATGCTGGAAACAGCATA	GTGGAAAGGACGAAACACCGCACCTAGGGGCCAGGGCGCCGTTTAAGAGCTATGCTGGAAACAGCATA
PML_2649.457	AGTCGGCCGACTCTTTGCAG	GTGGAAAGGACGAAACACCG	GTTTAAGAGCTATGCTGGAAACAGCATA	GTGGAAAGGACGAAACACCGAGTCGGCCGACTCTTTGCAGGTTTAAGAGCTATGCTGGAAACAGCATA
PML_2649.26	CCTCTGCGCCAAGTGCTTCG	GTGGAAAGGACGAAACACCG	GTTTAAGAGCTATGCTGGAAACAGCATA	GTGGAAAGGACGAAACACCGCCTCTGCGCCAAGTGCTTCGGTTTAAGAGCTATGCTGGAAACAGCATA
PML_2649.47	GATCCGCGAGCGCGTGCGCC	GTGGAAAGGACGAAACACCG	GTTTAAGAGCTATGCTGGAAACAGCATA	GTGGAAAGGACGAAACACCGGATCCGCGAGCGCGTGCGCCGTTTAAGAGCTATGCTGGAAACAGCATA
PML_2649.364	CTTCTGGGCTGTCGTTGTAT	GTGGAAAGGACGAAACACCG	GTTTAAGAGCTATGCTGGAAACAGCATA	GTGGAAAGGACGAAACACCGCTTCTGGGCTGTCGTTGTATGTTTAAGAGCTATGCTGGAAACAGCATA
PML_2649.304	CCACGCGGAACTTGCTTTCC	GTGGAAAGGACGAAACACCG	GTTTAAGAGCTATGCTGGAAACAGCATA	GTGGAAAGGACGAAACACCGCCACGCGGAACTTGCTTTCCGTTTAAGAGCTATGCTGGAAACAGCATA
PML_2649.148	CTCCATGCGCCGCCCTATCT	GTGGAAAGGACGAAACACCG	GTTTAAGAGCTATGCTGGAAACAGCATA	GTGGAAAGGACGAAACACCGCTCCATGCGCCGCCCTATCTGTTTAAGAGCTATGCTGGAAACAGCATA
PML_2649.279	ACGCTCCCGGATGAGAGGCA	GTGGAAAGGACGAAACACCG	GTTTAAGAGCTATGCTGGAAACAGCATA	GTGGAAAGGACGAAACACCGACGCTCCCGGATGAGAGGCAGTTTAAGAGCTATGCTGGAAACAGCATA
PPP1R11_381.2	GGAGCCTTACCATCAAACTT	GTGGAAAGGACGAAACACCG	GTTTAAGAGCTATGCTGGAAACAGCATA	GTGGAAAGGACGAAACACCGGGAGCCTTACCATCAAACTTGTTTAAGAGCTATGCTGGAAACAGCATA
PPP1R11_381.7	CACTGTGGACAATGAACACA	GTGGAAAGGACGAAACACCG	GTTTAAGAGCTATGCTGGAAACAGCATA	GTGGAAAGGACGAAACACCGCACTGTGGACAATGAACACAGTTTAAGAGCTATGCTGGAAACAGCATA
PPP1R11_381.9	GCTGTATTTATGAGAAACCT	GTGGAAAGGACGAAACACCG	GTTTAAGAGCTATGCTGGAAACAGCATA	GTGGAAAGGACGAAACACCGGCTGTATTTATGAGAAACCTGTTTAAGAGCTATGCTGGAAACAGCATA
PPP1R11_381.11	TATGAGAAACCTCGGGCCTT	GTGGAAAGGACGAAACACCG	GTTTAAGAGCTATGCTGGAAACAGCATA	GTGGAAAGGACGAAACACCGTATGAGAAACCTCGGGCCTTGTTTAAGAGCTATGCTGGAAACAGCATA
PRAM1_2013.161	CTTCTTCCGGAACTCCCTCT	GTGGAAAGGACGAAACACCG	GTTTAAGAGCTATGCTGGAAACAGCATA	GTGGAAAGGACGAAACACCGCTTCTTCCGGAACTCCCTCTGTTTAAGAGCTATGCTGGAAACAGCATA
PRAM1_2013.159	CGCGACGTGTCTTAGCGTTG	GTGGAAAGGACGAAACACCG	GTTTAAGAGCTATGCTGGAAACAGCATA	GTGGAAAGGACGAAACACCGCGCGACGTGTCTTAGCGTTGGTTTAAGAGCTATGCTGGAAACAGCATA
PRAM1_2013.122	AAGCACCTCGGGATCCGGCG	GTGGAAAGGACGAAACACCG	GTTTAAGAGCTATGCTGGAAACAGCATA	GTGGAAAGGACGAAACACCGAAGCACCTCGGGATCCGGCGGTTTAAGAGCTATGCTGGAAACAGCATA
PRAM1_2013.127	GATCGAGTTCACCAGCAATG	GTGGAAAGGACGAAACACCG	GTTTAAGAGCTATGCTGGAAACAGCATA	GTGGAAAGGACGAAACACCGGATCGAGTTCACCAGCAATGGTTTAAGAGCTATGCTGGAAACAGCATA
RAG1_3132.371	GCGGCAGAGATGTCGAAGGT	GTGGAAAGGACGAAACACCG	GTTTAAGAGCTATGCTGGAAACAGCATA	GTGGAAAGGACGAAACACCGGCGGCAGAGATGTCGAAGGTGTTTAAGAGCTATGCTGGAAACAGCATA
RAG1_3132.353	GCATGATGCTCCAGCAGTTA	GTGGAAAGGACGAAACACCG	GTTTAAGAGCTATGCTGGAAACAGCATA	GTGGAAAGGACGAAACACCGGCATGATGCTCCAGCAGTTAGTTTAAGAGCTATGCTGGAAACAGCATA
RAG1_3132.34	ACATCTGCAACACTGCCCGT	GTGGAAAGGACGAAACACCG	GTTTAAGAGCTATGCTGGAAACAGCATA	GTGGAAAGGACGAAACACCGACATCTGCAACACTGCCCGTGTTTAAGAGCTATGCTGGAAACAGCATA
RAG1_3132.326	GCTTACAGTTGGTCTCCACA	GTGGAAAGGACGAAACACCG	GTTTAAGAGCTATGCTGGAAACAGCATA	GTGGAAAGGACGAAACACCGGCTTACAGTTGGTCTCCACAGTTTAAGAGCTATGCTGGAAACAGCATA
RAG1_3132.325	TGCTTACAGTTGGTCTCCAC	GTGGAAAGGACGAAACACCG	GTTTAAGAGCTATGCTGGAAACAGCATA	GTGGAAAGGACGAAACACCGTGCTTACAGTTGGTCTCCACGTTTAAGAGCTATGCTGGAAACAGCATA
RAG1_3132.45	CTGTAAGCATGTCTTTTGCC	GTGGAAAGGACGAAACACCG	GTTTAAGAGCTATGCTGGAAACAGCATA	GTGGAAAGGACGAAACACCGCTGTAAGCATGTCTTTTGCCGTTTAAGAGCTATGCTGGAAACAGCATA
RAG1_3132.47	CTCAGATGCCTCAAAGTCAT	GTGGAAAGGACGAAACACCG	GTTTAAGAGCTATGCTGGAAACAGCATA	GTGGAAAGGACGAAACACCGCTCAGATGCCTCAAAGTCATGTTTAAGAGCTATGCTGGAAACAGCATA
RAG1_3132.321	AAGCATGGATATCGGCAAGA	GTGGAAAGGACGAAACACCG	GTTTAAGAGCTATGCTGGAAACAGCATA	GTGGAAAGGACGAAACACCGAAGCATGGATATCGGCAAGAGTTTAAGAGCTATGCTGGAAACAGCATA
RAG1_3132.310	TCCTCATTGCACTCTTTTGC	GTGGAAAGGACGAAACACCG	GTTTAAGAGCTATGCTGGAAACAGCATA	GTGGAAAGGACGAAACACCGTCCTCATTGCACTCTTTTGCGTTTAAGAGCTATGCTGGAAACAGCATA
RAG1_3132.277	ATAGCGGAACCTCTTTGCAA	GTGGAAAGGACGAAACACCG	GTTTAAGAGCTATGCTGGAAACAGCATA	GTGGAAAGGACGAAACACCGATAGCGGAACCTCTTTGCAAGTTTAAGAGCTATGCTGGAAACAGCATA
RAG1_3132.259	GGATGGCAGTCAGCGTCTCG	GTGGAAAGGACGAAACACCG	GTTTAAGAGCTATGCTGGAAACAGCATA	GTGGAAAGGACGAAACACCGGGATGGCAGTCAGCGTCTCGGTTTAAGAGCTATGCTGGAAACAGCATA
RAG1_3132.129	TGAGAACCTGGAACGTTATG	GTGGAAAGGACGAAACACCG	GTTTAAGAGCTATGCTGGAAACAGCATA	GTGGAAAGGACGAAACACCGTGAGAACCTGGAACGTTATGGTTTAAGAGCTATGCTGGAAACAGCATA
RAPSN_1239.218	TCTGGTTGGACTGGTACAGC	GTGGAAAGGACGAAACACCG	GTTTAAGAGCTATGCTGGAAACAGCATA	GTGGAAAGGACGAAACACCGTCTGGTTGGACTGGTACAGCGTTTAAGAGCTATGCTGGAAACAGCATA
RAPSN_1239.12	CATGGGGCGCTTCCGCGTGC	GTGGAAAGGACGAAACACCG	GTTTAAGAGCTATGCTGGAAACAGCATA	GTGGAAAGGACGAAACACCGCATGGGGCGCTTCCGCGTGCGTTTAAGAGCTATGCTGGAAACAGCATA
RAPSN_1239.201	GCTTCTCGTTGCTGCGTGCC	GTGGAAAGGACGAAACACCG	GTTTAAGAGCTATGCTGGAAACAGCATA	GTGGAAAGGACGAAACACCGGCTTCTCGTTGCTGCGTGCCGTTTAAGAGCTATGCTGGAAACAGCATA
RAPSN_1239.180	GCACACGCGGCACTCGAGCA	GTGGAAAGGACGAAACACCG	GTTTAAGAGCTATGCTGGAAACAGCATA	GTGGAAAGGACGAAACACCGGCACACGCGGCACTCGAGCAGTTTAAGAGCTATGCTGGAAACAGCATA
RAPSN_1239.70	TGACATCCACCGGAGCCGTG	GTGGAAAGGACGAAACACCG	GTTTAAGAGCTATGCTGGAAACAGCATA	GTGGAAAGGACGAAACACCGTGACATCCACCGGAGCCGTGGTTTAAGAGCTATGCTGGAAACAGCATA
RAPSN_1239.76	CCGAGATCGGAAACCGCCTG	GTGGAAAGGACGAAACACCG	GTTTAAGAGCTATGCTGGAAACAGCATA	GTGGAAAGGACGAAACACCGCCGAGATCGGAAACCGCCTGGTTTAAGAGCTATGCTGGAAACAGCATA
RAPSN_1239.141	CAGATCCTGGGCTCTCTCGA	GTGGAAAGGACGAAACACCG	GTTTAAGAGCTATGCTGGAAACAGCATA	GTGGAAAGGACGAAACACCGCAGATCCTGGGCTCTCTCGAGTTTAAGAGCTATGCTGGAAACAGCATA
RAPSN_1239.108	GAGCTCTACTGCGGCCTGTG	GTGGAAAGGACGAAACACCG	GTTTAAGAGCTATGCTGGAAACAGCATA	GTGGAAAGGACGAAACACCGGAGCTCTACTGCGGCCTGTGGTTTAAGAGCTATGCTGGAAACAGCATA
RAPSN_1239.134	CGCCTATGGACTCGCCGCAC	GTGGAAAGGACGAAACACCG	GTTTAAGAGCTATGCTGGAAACAGCATA	GTGGAAAGGACGAAACACCGCGCCTATGGACTCGCCGCACGTTTAAGAGCTATGCTGGAAACAGCATA
RAPSN_1239.133	CCGGCTGTTCTTCTCGCCTA	GTGGAAAGGACGAAACACCG	GTTTAAGAGCTATGCTGGAAACAGCATA	GTGGAAAGGACGAAACACCGCCGGCTGTTCTTCTCGCCTAGTTTAAGAGCTATGCTGGAAACAGCATA
RAPSN_1239.111	CGAGAAGAACAGCCGGCTGC	GTGGAAAGGACGAAACACCG	GTTTAAGAGCTATGCTGGAAACAGCATA	GTGGAAAGGACGAAACACCGCGAGAAGAACAGCCGGCTGCGTTTAAGAGCTATGCTGGAAACAGCATA
RAPSN_1239.124	TCCGGGTCCCGTTGTTCTGC	GTGGAAAGGACGAAACACCG	GTTTAAGAGCTATGCTGGAAACAGCATA	GTGGAAAGGACGAAACACCGTCCGGGTCCCGTTGTTCTGCGTTTAAGAGCTATGCTGGAAACAGCATA
RAPSN_1239.121	ATGGATGAGCGGCGGCAGTT	GTGGAAAGGACGAAACACCG	GTTTAAGAGCTATGCTGGAAACAGCATA	GTGGAAAGGACGAAACACCGATGGATGAGCGGCGGCAGTTGTTTAAGAGCTATGCTGGAAACAGCATA
RBBP6_5379.1	ATGATACCGTCACCTTTGAT	GTGGAAAGGACGAAACACCG	GTTTAAGAGCTATGCTGGAAACAGCATA	GTGGAAAGGACGAAACACCGATGATACCGTCACCTTTGATGTTTAAGAGCTATGCTGGAAACAGCATA
RBBP6_5379.486	TCTGCGCATTGGTGATCTGC	GTGGAAAGGACGAAACACCG	GTTTAAGAGCTATGCTGGAAACAGCATA	GTGGAAAGGACGAAACACCGTCTGCGCATTGGTGATCTGCGTTTAAGAGCTATGCTGGAAACAGCATA
RBBP6_5379.10	AAAGCAATGATGTCGCAATC	GTGGAAAGGACGAAACACCG	GTTTAAGAGCTATGCTGGAAACAGCATA	GTGGAAAGGACGAAACACCGAAAGCAATGATGTCGCAATCGTTTAAGAGCTATGCTGGAAACAGCATA
RBBP6_5379.22	GGTGCAATGCTTACCAACAC	GTGGAAAGGACGAAACACCG	GTTTAAGAGCTATGCTGGAAACAGCATA	GTGGAAAGGACGAAACACCGGGTGCAATGCTTACCAACACGTTTAAGAGCTATGCTGGAAACAGCATA
RBBP6_5379.26	ATTGTTGTGTCTCATCTGCA	GTGGAAAGGACGAAACACCG	GTTTAAGAGCTATGCTGGAAACAGCATA	GTGGAAAGGACGAAACACCGATTGTTGTGTCTCATCTGCAGTTTAAGAGCTATGCTGGAAACAGCATA
RBBP6_5379.27	GCTGTTGTGATTCCCTGCTG	GTGGAAAGGACGAAACACCG	GTTTAAGAGCTATGCTGGAAACAGCATA	GTGGAAAGGACGAAACACCGGCTGTTGTGATTCCCTGCTGGTTTAAGAGCTATGCTGGAAACAGCATA
RBBP6_5379.448	ACAGTAACTGTTTCCACAGC	GTGGAAAGGACGAAACACCG	GTTTAAGAGCTATGCTGGAAACAGCATA	GTGGAAAGGACGAAACACCGACAGTAACTGTTTCCACAGCGTTTAAGAGCTATGCTGGAAACAGCATA
RBBP6_5379.447	ATGTGTGCTCATCTGATTCC	GTGGAAAGGACGAAACACCG	GTTTAAGAGCTATGCTGGAAACAGCATA	GTGGAAAGGACGAAACACCGATGTGTGCTCATCTGATTCCGTTTAAGAGCTATGCTGGAAACAGCATA
RBBP6_5379.446	ACATCATTTTGATGACACGT	GTGGAAAGGACGAAACACCG	GTTTAAGAGCTATGCTGGAAACAGCATA	GTGGAAAGGACGAAACACCGACATCATTTTGATGACACGTGTTTAAGAGCTATGCTGGAAACAGCATA
RBBP6_5379.445	TTATTGGCAATTAAAGCATC	GTGGAAAGGACGAAACACCG	GTTTAAGAGCTATGCTGGAAACAGCATA	GTGGAAAGGACGAAACACCGTTATTGGCAATTAAAGCATCGTTTAAGAGCTATGCTGGAAACAGCATA
RBBP6_5379.296	TTAATTGGAGGTTCAGATCG	GTGGAAAGGACGAAACACCG	GTTTAAGAGCTATGCTGGAAACAGCATA	GTGGAAAGGACGAAACACCGTTAATTGGAGGTTCAGATCGGTTTAAGAGCTATGCTGGAAACAGCATA
RBBP6_5379.242	GCAGAATCTTTATTCCGAGA	GTGGAAAGGACGAAACACCG	GTTTAAGAGCTATGCTGGAAACAGCATA	GTGGAAAGGACGAAACACCGGCAGAATCTTTATTCCGAGAGTTTAAGAGCTATGCTGGAAACAGCATA
RBCK1_1533.8	AGTGGCGGGCGGGGATGAAC	GTGGAAAGGACGAAACACCG	GTTTAAGAGCTATGCTGGAAACAGCATA	GTGGAAAGGACGAAACACCGAGTGGCGGGCGGGGATGAACGTTTAAGAGCTATGCTGGAAACAGCATA
RBCK1_1533.22	AGTGCGCCCTGATATGACAG	GTGGAAAGGACGAAACACCG	GTTTAAGAGCTATGCTGGAAACAGCATA	GTGGAAAGGACGAAACACCGAGTGCGCCCTGATATGACAGGTTTAAGAGCTATGCTGGAAACAGCATA
RBCK1_1533.39	CCCATGGGGTGCGGCAGAAT	GTGGAAAGGACGAAACACCG	GTTTAAGAGCTATGCTGGAAACAGCATA	GTGGAAAGGACGAAACACCGCCCATGGGGTGCGGCAGAATGTTTAAGAGCTATGCTGGAAACAGCATA
RBCK1_1533.76	CGCCTCATACCAGCCCGACG	GTGGAAAGGACGAAACACCG	GTTTAAGAGCTATGCTGGAAACAGCATA	GTGGAAAGGACGAAACACCGCGCCTCATACCAGCCCGACGGTTTAAGAGCTATGCTGGAAACAGCATA
RBCK1_1533.222	TAGCACACGGGGCACTCGGC	GTGGAAAGGACGAAACACCG	GTTTAAGAGCTATGCTGGAAACAGCATA	GTGGAAAGGACGAAACACCGTAGCACACGGGGCACTCGGCGTTTAAGAGCTATGCTGGAAACAGCATA
RBCK1_1533.93	CGAGTGCCCCGTGTGCTACT	GTGGAAAGGACGAAACACCG	GTTTAAGAGCTATGCTGGAAACAGCATA	GTGGAAAGGACGAAACACCGCGAGTGCCCCGTGTGCTACTGTTTAAGAGCTATGCTGGAAACAGCATA
RBCK1_1533.94	CCCCGTGTGCTACTCGGTGC	GTGGAAAGGACGAAACACCG	GTTTAAGAGCTATGCTGGAAACAGCATA	GTGGAAAGGACGAAACACCGCCCCGTGTGCTACTCGGTGCGTTTAAGAGCTATGCTGGAAACAGCATA
RBCK1_1533.215	ACGCAGCACCACGGCCTCGC	GTGGAAAGGACGAAACACCG	GTTTAAGAGCTATGCTGGAAACAGCATA	GTGGAAAGGACGAAACACCGACGCAGCACCACGGCCTCGCGTTTAAGAGCTATGCTGGAAACAGCATA
RBCK1_1533.102	GGGCACCATCCGCAACAGCC	GTGGAAAGGACGAAACACCG	GTTTAAGAGCTATGCTGGAAACAGCATA	GTGGAAAGGACGAAACACCGGGGCACCATCCGCAACAGCCGTTTAAGAGCTATGCTGGAAACAGCATA
RBCK1_1533.105	CCGCAACAGCCAGGAGGCGG	GTGGAAAGGACGAAACACCG	GTTTAAGAGCTATGCTGGAAACAGCATA	GTGGAAAGGACGAAACACCGCCGCAACAGCCAGGAGGCGGGTTTAAGAGCTATGCTGGAAACAGCATA
RBCK1_1533.114	TACCAGCGATTTCTAGACCT	GTGGAAAGGACGAAACACCG	GTTTAAGAGCTATGCTGGAAACAGCATA	GTGGAAAGGACGAAACACCGTACCAGCGATTTCTAGACCTGTTTAAGAGCTATGCTGGAAACAGCATA
RBCK1_1533.195	GGTCTTGCAATGGTAGCTGA	GTGGAAAGGACGAAACACCG	GTTTAAGAGCTATGCTGGAAACAGCATA	GTGGAAAGGACGAAACACCGGGTCTTGCAATGGTAGCTGAGTTTAAGAGCTATGCTGGAAACAGCATA
RBCK1_1533.191	AAGCACCATCCCTTGCAATC	GTGGAAAGGACGAAACACCG	GTTTAAGAGCTATGCTGGAAACAGCATA	GTGGAAAGGACGAAACACCGAAGCACCATCCCTTGCAATCGTTTAAGAGCTATGCTGGAAACAGCATA
RBCK1_1533.187	TGCAGAGCAGGCAGTTGACG	GTGGAAAGGACGAAACACCG	GTTTAAGAGCTATGCTGGAAACAGCATA	GTGGAAAGGACGAAACACCGTGCAGAGCAGGCAGTTGACGGTTTAAGAGCTATGCTGGAAACAGCATA
RBX1_327.8	TGCAGTAGCCCTCTGGGCCT	GTGGAAAGGACGAAACACCG	GTTTAAGAGCTATGCTGGAAACAGCATA	GTGGAAAGGACGAAACACCGTGCAGTAGCCCTCTGGGCCTGTTTAAGAGCTATGCTGGAAACAGCATA
RBX1_327.30	GTTATCAACCACAATATCCC	GTGGAAAGGACGAAACACCG	GTTTAAGAGCTATGCTGGAAACAGCATA	GTGGAAAGGACGAAACACCGGTTATCAACCACAATATCCCGTTTAAGAGCTATGCTGGAAACAGCATA
RBX1_327.27	CTTCTGAAGTAGCGGACGCC	GTGGAAAGGACGAAACACCG	GTTTAAGAGCTATGCTGGAAACAGCATA	GTGGAAAGGACGAAACACCGCTTCTGAAGTAGCGGACGCCGTTTAAGAGCTATGCTGGAAACAGCATA
RBX1_327.14	AGAAGAGTGTACTGTCGCAT	GTGGAAAGGACGAAACACCG	GTTTAAGAGCTATGCTGGAAACAGCATA	GTGGAAAGGACGAAACACCGAGAAGAGTGTACTGTCGCATGTTTAAGAGCTATGCTGGAAACAGCATA
RBX1_327.15	GAAGAGTGTACTGTCGCATG	GTGGAAAGGACGAAACACCG	GTTTAAGAGCTATGCTGGAAACAGCATA	GTGGAAAGGACGAAACACCGGAAGAGTGTACTGTCGCATGGTTTAAGAGCTATGCTGGAAACAGCATA
RBX1_327.16	ACTTCCACTGCATCTCTCGC	GTGGAAAGGACGAAACACCG	GTTTAAGAGCTATGCTGGAAACAGCATA	GTGGAAAGGACGAAACACCGACTTCCACTGCATCTCTCGCGTTTAAGAGCTATGCTGGAAACAGCATA
RBX1_327.17	TCGCTGGCTCAAAACACGAC	GTGGAAAGGACGAAACACCG	GTTTAAGAGCTATGCTGGAAACAGCATA	GTGGAAAGGACGAAACACCGTCGCTGGCTCAAAACACGACGTTTAAGAGCTATGCTGGAAACAGCATA
RBX1_327.18	AACACGACAGGTGTGTCCAT	GTGGAAAGGACGAAACACCG	GTTTAAGAGCTATGCTGGAAACAGCATA	GTGGAAAGGACGAAACACCGAACACGACAGGTGTGTCCATGTTTAAGAGCTATGCTGGAAACAGCATA
RC3H1_3405.424	TCGAAAGTCTGAGTGCAAAT	GTGGAAAGGACGAAACACCG	GTTTAAGAGCTATGCTGGAAACAGCATA	GTGGAAAGGACGAAACACCGTCGAAAGTCTGAGTGCAAATGTTTAAGAGCTATGCTGGAAACAGCATA
RC3H1_3405.2	AATTCGAAAGCCCATCAGTT	GTGGAAAGGACGAAACACCG	GTTTAAGAGCTATGCTGGAAACAGCATA	GTGGAAAGGACGAAACACCGAATTCGAAAGCCCATCAGTTGTTTAAGAGCTATGCTGGAAACAGCATA
RC3H1_3405.423	TGGCCACAACCCAAACTGAT	GTGGAAAGGACGAAACACCG	GTTTAAGAGCTATGCTGGAAACAGCATA	GTGGAAAGGACGAAACACCGTGGCCACAACCCAAACTGATGTTTAAGAGCTATGCTGGAAACAGCATA
RC3H1_3405.421	GGCACATCTTGCAGACAGTA	GTGGAAAGGACGAAACACCG	GTTTAAGAGCTATGCTGGAAACAGCATA	GTGGAAAGGACGAAACACCGGGCACATCTTGCAGACAGTAGTTTAAGAGCTATGCTGGAAACAGCATA
RC3H1_3405.420	CCTTGCGGTGGAGTTTATTC	GTGGAAAGGACGAAACACCG	GTTTAAGAGCTATGCTGGAAACAGCATA	GTGGAAAGGACGAAACACCGCCTTGCGGTGGAGTTTATTCGTTTAAGAGCTATGCTGGAAACAGCATA
RC3H1_3405.5	CCTGAATAAACTCCACCGCA	GTGGAAAGGACGAAACACCG	GTTTAAGAGCTATGCTGGAAACAGCATA	GTGGAAAGGACGAAACACCGCCTGAATAAACTCCACCGCAGTTTAAGAGCTATGCTGGAAACAGCATA
RC3H1_3405.419	CAAATGGGCAAGCCTTGCGG	GTGGAAAGGACGAAACACCG	GTTTAAGAGCTATGCTGGAAACAGCATA	GTGGAAAGGACGAAACACCGCAAATGGGCAAGCCTTGCGGGTTTAAGAGCTATGCTGGAAACAGCATA
RC3H1_3405.24	CCAATCTTTGGGCAGCAGTA	GTGGAAAGGACGAAACACCG	GTTTAAGAGCTATGCTGGAAACAGCATA	GTGGAAAGGACGAAACACCGCCAATCTTTGGGCAGCAGTAGTTTAAGAGCTATGCTGGAAACAGCATA
RC3H1_3405.28	TGGGCAGCAGTAAGGGCTAG	GTGGAAAGGACGAAACACCG	GTTTAAGAGCTATGCTGGAAACAGCATA	GTGGAAAGGACGAAACACCGTGGGCAGCAGTAAGGGCTAGGTTTAAGAGCTATGCTGGAAACAGCATA
RC3H1_3405.65	AGAGAGGAGGATGCCCTCGT	GTGGAAAGGACGAAACACCG	GTTTAAGAGCTATGCTGGAAACAGCATA	GTGGAAAGGACGAAACACCGAGAGAGGAGGATGCCCTCGTGTTTAAGAGCTATGCTGGAAACAGCATA
RC3H1_3405.359	ATGTACAGCTGGCCCCACGA	GTGGAAAGGACGAAACACCG	GTTTAAGAGCTATGCTGGAAACAGCATA	GTGGAAAGGACGAAACACCGATGTACAGCTGGCCCCACGAGTTTAAGAGCTATGCTGGAAACAGCATA
RC3H2_3576.365	TTCATTATAGCAGATTGGAC	GTGGAAAGGACGAAACACCG	GTTTAAGAGCTATGCTGGAAACAGCATA	GTGGAAAGGACGAAACACCGTTCATTATAGCAGATTGGACGTTTAAGAGCTATGCTGGAAACAGCATA
RC3H2_3576.1	GTGCACAAACCCATCAGTTT	GTGGAAAGGACGAAACACCG	GTTTAAGAGCTATGCTGGAAACAGCATA	GTGGAAAGGACGAAACACCGGTGCACAAACCCATCAGTTTGTTTAAGAGCTATGCTGGAAACAGCATA
RC3H2_3576.363	TGTGAACAACCTAAACTGAT	GTGGAAAGGACGAAACACCG	GTTTAAGAGCTATGCTGGAAACAGCATA	GTGGAAAGGACGAAACACCGTGTGAACAACCTAAACTGATGTTTAAGAGCTATGCTGGAAACAGCATA
RC3H2_3576.362	GTGTGAACAACCTAAACTGA	GTGGAAAGGACGAAACACCG	GTTTAAGAGCTATGCTGGAAACAGCATA	GTGGAAAGGACGAAACACCGGTGTGAACAACCTAAACTGAGTTTAAGAGCTATGCTGGAAACAGCATA
RC3H2_3576.361	TCGATGAAGTTTATTCAAGC	GTGGAAAGGACGAAACACCG	GTTTAAGAGCTATGCTGGAAACAGCATA	GTGGAAAGGACGAAACACCGTCGATGAAGTTTATTCAAGCGTTTAAGAGCTATGCTGGAAACAGCATA
RC3H2_3576.341	GCATCCTCGAGCCCTGACAG	GTGGAAAGGACGAAACACCG	GTTTAAGAGCTATGCTGGAAACAGCATA	GTGGAAAGGACGAAACACCGGCATCCTCGAGCCCTGACAGGTTTAAGAGCTATGCTGGAAACAGCATA
RC3H2_3576.24	CTCGAGGATGCCAGTTTTTA	GTGGAAAGGACGAAACACCG	GTTTAAGAGCTATGCTGGAAACAGCATA	GTGGAAAGGACGAAACACCGCTCGAGGATGCCAGTTTTTAGTTTAAGAGCTATGCTGGAAACAGCATA
RC3H2_3576.52	TGCCGAGATTTGCGACAGCA	GTGGAAAGGACGAAACACCG	GTTTAAGAGCTATGCTGGAAACAGCATA	GTGGAAAGGACGAAACACCGTGCCGAGATTTGCGACAGCAGTTTAAGAGCTATGCTGGAAACAGCATA
RC3H2_3576.56	CAGCAAGGGGGTTGTCCACG	GTGGAAAGGACGAAACACCG	GTTTAAGAGCTATGCTGGAAACAGCATA	GTGGAAAGGACGAAACACCGCAGCAAGGGGGTTGTCCACGGTTTAAGAGCTATGCTGGAAACAGCATA
RCHY1_720.40	GTATAAAGCTTGTCACAGCA	GTGGAAAGGACGAAACACCG	GTTTAAGAGCTATGCTGGAAACAGCATA	GTGGAAAGGACGAAACACCGGTATAAAGCTTGTCACAGCAGTTTAAGAGCTATGCTGGAAACAGCATA
RCHY1_720.39	CATTGTTATCATGACACAAG	GTGGAAAGGACGAAACACCG	GTTTAAGAGCTATGCTGGAAACAGCATA	GTGGAAAGGACGAAACACCGCATTGTTATCATGACACAAGGTTTAAGAGCTATGCTGGAAACAGCATA
RCHY1_720.1	ACTAGATCGCTTTAAAGTGA	GTGGAAAGGACGAAACACCG	GTTTAAGAGCTATGCTGGAAACAGCATA	GTGGAAAGGACGAAACACCGACTAGATCGCTTTAAAGTGAGTTTAAGAGCTATGCTGGAAACAGCATA
RCHY1_720.8	ACAGAATTGTCCAATATGTT	GTGGAAAGGACGAAACACCG	GTTTAAGAGCTATGCTGGAAACAGCATA	GTGGAAAGGACGAAACACCGACAGAATTGTCCAATATGTTGTTTAAGAGCTATGCTGGAAACAGCATA
RCHY1_720.29	CAAGACATGAGCAACAACAC	GTGGAAAGGACGAAACACCG	GTTTAAGAGCTATGCTGGAAACAGCATA	GTGGAAAGGACGAAACACCGCAAGACATGAGCAACAACACGTTTAAGAGCTATGCTGGAAACAGCATA
RCHY1_720.28	GCAAGACATGAGCAACAACA	GTGGAAAGGACGAAACACCG	GTTTAAGAGCTATGCTGGAAACAGCATA	GTGGAAAGGACGAAACACCGGCAAGACATGAGCAACAACAGTTTAAGAGCTATGCTGGAAACAGCATA
RCHY1_720.10	GTTGCTCATGTCTTGCCATG	GTGGAAAGGACGAAACACCG	GTTTAAGAGCTATGCTGGAAACAGCATA	GTGGAAAGGACGAAACACCGGTTGCTCATGTCTTGCCATGGTTTAAGAGCTATGCTGGAAACAGCATA
RCHY1_720.13	CTTTAGATATGACCAGGTAT	GTGGAAAGGACGAAACACCG	GTTTAAGAGCTATGCTGGAAACAGCATA	GTGGAAAGGACGAAACACCGCTTTAGATATGACCAGGTATGTTTAAGAGCTATGCTGGAAACAGCATA
RCHY1_720.14	GACCAGGTATTGGAGACAGC	GTGGAAAGGACGAAACACCG	GTTTAAGAGCTATGCTGGAAACAGCATA	GTGGAAAGGACGAAACACCGGACCAGGTATTGGAGACAGCGTTTAAGAGCTATGCTGGAAACAGCATA
RCHY1_720.16	ATTCTCTGCAATGACTGTAA	GTGGAAAGGACGAAACACCG	GTTTAAGAGCTATGCTGGAAACAGCATA	GTGGAAAGGACGAAACACCGATTCTCTGCAATGACTGTAAGTTTAAGAGCTATGCTGGAAACAGCATA
RFFL_1092.13	GAACCAAGCTGCAAGTCCTG	GTGGAAAGGACGAAACACCG	GTTTAAGAGCTATGCTGGAAACAGCATA	GTGGAAAGGACGAAACACCGGAACCAAGCTGCAAGTCCTGGTTTAAGAGCTATGCTGGAAACAGCATA
RFFL_1092.161	ATTCCCTACTTGGCTCGAAC	GTGGAAAGGACGAAACACCG	GTTTAAGAGCTATGCTGGAAACAGCATA	GTGGAAAGGACGAAACACCGATTCCCTACTTGGCTCGAACGTTTAAGAGCTATGCTGGAAACAGCATA
RFFL_1092.160	GGCGGGGCCCATTCCCTACT	GTGGAAAGGACGAAACACCG	GTTTAAGAGCTATGCTGGAAACAGCATA	GTGGAAAGGACGAAACACCGGGCGGGGCCCATTCCCTACTGTTTAAGAGCTATGCTGGAAACAGCATA
RFFL_1092.90	AGTCCATGCAGATCTTACAC	GTGGAAAGGACGAAACACCG	GTTTAAGAGCTATGCTGGAAACAGCATA	GTGGAAAGGACGAAACACCGAGTCCATGCAGATCTTACACGTTTAAGAGCTATGCTGGAAACAGCATA
RFFL_1092.75	ACCCATTGACTGTGTTCTTC	GTGGAAAGGACGAAACACCG	GTTTAAGAGCTATGCTGGAAACAGCATA	GTGGAAAGGACGAAACACCGACCCATTGACTGTGTTCTTCGTTTAAGAGCTATGCTGGAAACAGCATA
RFFL_1092.87	ACTTGGTACAGGTTACCATG	GTGGAAAGGACGAAACACCG	GTTTAAGAGCTATGCTGGAAACAGCATA	GTGGAAAGGACGAAACACCGACTTGGTACAGGTTACCATGGTTTAAGAGCTATGCTGGAAACAGCATA
RFFL_1092.78	ATGGTAACCTGTACCAAGTG	GTGGAAAGGACGAAACACCG	GTTTAAGAGCTATGCTGGAAACAGCATA	GTGGAAAGGACGAAACACCGATGGTAACCTGTACCAAGTGGTTTAAGAGCTATGCTGGAAACAGCATA
RFFL_1092.85	ATTCATGCGCTTGCCACACT	GTGGAAAGGACGAAACACCG	GTTTAAGAGCTATGCTGGAAACAGCATA	GTGGAAAGGACGAAACACCGATTCATGCGCTTGCCACACTGTTTAAGAGCTATGCTGGAAACAGCATA
RFFL_1092.83	GATTACATACTGCCGGCAGA	GTGGAAAGGACGAAACACCG	GTTTAAGAGCTATGCTGGAAACAGCATA	GTGGAAAGGACGAAACACCGGATTACATACTGCCGGCAGAGTTTAAGAGCTATGCTGGAAACAGCATA
RFPL4B_792.0	GTTGTCCTGTCCAGTTTGCC	GTGGAAAGGACGAAACACCG	GTTTAAGAGCTATGCTGGAAACAGCATA	GTGGAAAGGACGAAACACCGGTTGTCCTGTCCAGTTTGCCGTTTAAGAGCTATGCTGGAAACAGCATA
RFPL4B_792.1	TCTGCTTTGATTGCATCCAG	GTGGAAAGGACGAAACACCG	GTTTAAGAGCTATGCTGGAAACAGCATA	GTGGAAAGGACGAAACACCGTCTGCTTTGATTGCATCCAGGTTTAAGAGCTATGCTGGAAACAGCATA
RFPL4B_792.91	GGCACATCGCTCTAAAATCA	GTGGAAAGGACGAAACACCG	GTTTAAGAGCTATGCTGGAAACAGCATA	GTGGAAAGGACGAAACACCGGGCACATCGCTCTAAAATCAGTTTAAGAGCTATGCTGGAAACAGCATA
RFPL4B_792.90	TCACCACGTCTCGACACAAG	GTGGAAAGGACGAAACACCG	GTTTAAGAGCTATGCTGGAAACAGCATA	GTGGAAAGGACGAAACACCGTCACCACGTCTCGACACAAGGTTTAAGAGCTATGCTGGAAACAGCATA
RFPL4B_792.89	TTCACCACGTCTCGACACAA	GTGGAAAGGACGAAACACCG	GTTTAAGAGCTATGCTGGAAACAGCATA	GTGGAAAGGACGAAACACCGTTCACCACGTCTCGACACAAGTTTAAGAGCTATGCTGGAAACAGCATA
RFPL4B_792.2	GTGCCCCTTGTGTCGAGACG	GTGGAAAGGACGAAACACCG	GTTTAAGAGCTATGCTGGAAACAGCATA	GTGGAAAGGACGAAACACCGGTGCCCCTTGTGTCGAGACGGTTTAAGAGCTATGCTGGAAACAGCATA
RFPL4B_792.3	CTTGTGTCGAGACGTGGTGA	GTGGAAAGGACGAAACACCG	GTTTAAGAGCTATGCTGGAAACAGCATA	GTGGAAAGGACGAAACACCGCTTGTGTCGAGACGTGGTGAGTTTAAGAGCTATGCTGGAAACAGCATA
RFPL4B_792.14	ACGATCTGACAAAAGATCCC	GTGGAAAGGACGAAACACCG	GTTTAAGAGCTATGCTGGAAACAGCATA	GTGGAAAGGACGAAACACCGACGATCTGACAAAAGATCCCGTTTAAGAGCTATGCTGGAAACAGCATA
RFPL4B_792.63	CGGCTCCTTGCAGACGCCCA	GTGGAAAGGACGAAACACCG	GTTTAAGAGCTATGCTGGAAACAGCATA	GTGGAAAGGACGAAACACCGCGGCTCCTTGCAGACGCCCAGTTTAAGAGCTATGCTGGAAACAGCATA
RFPL4B_792.36	AGCCCTCGCCTTCGCCGTGT	GTGGAAAGGACGAAACACCG	GTTTAAGAGCTATGCTGGAAACAGCATA	GTGGAAAGGACGAAACACCGAGCCCTCGCCTTCGCCGTGTGTTTAAGAGCTATGCTGGAAACAGCATA
RFWD2_2124.56	GAAGCATACATGACAAAATG	GTGGAAAGGACGAAACACCG	GTTTAAGAGCTATGCTGGAAACAGCATA	GTGGAAAGGACGAAACACCGGAAGCATACATGACAAAATGGTTTAAGAGCTATGCTGGAAACAGCATA
RFWD2_2124.57	CAAGTGTATTCATCAGAGTT	GTGGAAAGGACGAAACACCG	GTTTAAGAGCTATGCTGGAAACAGCATA	GTGGAAAGGACGAAACACCGCAAGTGTATTCATCAGAGTTGTTTAAGAGCTATGCTGGAAACAGCATA
RFWD2_2124.58	GTGTATTCATCAGAGTTTGG	GTGGAAAGGACGAAACACCG	GTTTAAGAGCTATGCTGGAAACAGCATA	GTGGAAAGGACGAAACACCGGTGTATTCATCAGAGTTTGGGTTTAAGAGCTATGCTGGAAACAGCATA
RFWD2_2124.187	TCCACAACATAGTTACACTT	GTGGAAAGGACGAAACACCG	GTTTAAGAGCTATGCTGGAAACAGCATA	GTGGAAAGGACGAAACACCGTCCACAACATAGTTACACTTGTTTAAGAGCTATGCTGGAAACAGCATA
RFWD2_2124.59	TCCCAAGTGTAACTATGTTG	GTGGAAAGGACGAAACACCG	GTTTAAGAGCTATGCTGGAAACAGCATA	GTGGAAAGGACGAAACACCGTCCCAAGTGTAACTATGTTGGTTTAAGAGCTATGCTGGAAACAGCATA
RFWD2_2124.88	TGTGACTATTTTGCGATTGC	GTGGAAAGGACGAAACACCG	GTTTAAGAGCTATGCTGGAAACAGCATA	GTGGAAAGGACGAAACACCGTGTGACTATTTTGCGATTGCGTTTAAGAGCTATGCTGGAAACAGCATA
RFWD2_2124.106	TACCAATCTAGACAACTCAG	GTGGAAAGGACGAAACACCG	GTTTAAGAGCTATGCTGGAAACAGCATA	GTGGAAAGGACGAAACACCGTACCAATCTAGACAACTCAGGTTTAAGAGCTATGCTGGAAACAGCATA
RFWD2_2124.149	GCCGAAAGCCAAATGGTATC	GTGGAAAGGACGAAACACCG	GTTTAAGAGCTATGCTGGAAACAGCATA	GTGGAAAGGACGAAACACCGGCCGAAAGCCAAATGGTATCGTTTAAGAGCTATGCTGGAAACAGCATA
RFWD2_2124.140	TATAATCTCCATTGGAAGCC	GTGGAAAGGACGAAACACCG	GTTTAAGAGCTATGCTGGAAACAGCATA	GTGGAAAGGACGAAACACCGTATAATCTCCATTGGAAGCCGTTTAAGAGCTATGCTGGAAACAGCATA
RFWD3_2325.99	GCGTTTAGCAGTTACCTCAG	GTGGAAAGGACGAAACACCG	GTTTAAGAGCTATGCTGGAAACAGCATA	GTGGAAAGGACGAAACACCGGCGTTTAGCAGTTACCTCAGGTTTAAGAGCTATGCTGGAAACAGCATA
RFWD3_2325.58	GGACACTTGTACAATATGTC	GTGGAAAGGACGAAACACCG	GTTTAAGAGCTATGCTGGAAACAGCATA	GTGGAAAGGACGAAACACCGGGACACTTGTACAATATGTCGTTTAAGAGCTATGCTGGAAACAGCATA
RFWD3_2325.60	CTGGAACAGTGGACCAATGC	GTGGAAAGGACGAAACACCG	GTTTAAGAGCTATGCTGGAAACAGCATA	GTGGAAAGGACGAAACACCGCTGGAACAGTGGACCAATGCGTTTAAGAGCTATGCTGGAAACAGCATA
RFWD3_2325.243	AGCGTAATGCTGAGAGCCGG	GTGGAAAGGACGAAACACCG	GTTTAAGAGCTATGCTGGAAACAGCATA	GTGGAAAGGACGAAACACCGAGCGTAATGCTGAGAGCCGGGTTTAAGAGCTATGCTGGAAACAGCATA
RFWD3_2325.64	CGGCTCTCAGCATTACGCTG	GTGGAAAGGACGAAACACCG	GTTTAAGAGCTATGCTGGAAACAGCATA	GTGGAAAGGACGAAACACCGCGGCTCTCAGCATTACGCTGGTTTAAGAGCTATGCTGGAAACAGCATA
RFWD3_2325.67	TACGCTGTGGGCATCTCTTT	GTGGAAAGGACGAAACACCG	GTTTAAGAGCTATGCTGGAAACAGCATA	GTGGAAAGGACGAAACACCGTACGCTGTGGGCATCTCTTTGTTTAAGAGCTATGCTGGAAACAGCATA
RFWD3_2325.69	GGTATAGGTGCATTTCCACG	GTGGAAAGGACGAAACACCG	GTTTAAGAGCTATGCTGGAAACAGCATA	GTGGAAAGGACGAAACACCGGGTATAGGTGCATTTCCACGGTTTAAGAGCTATGCTGGAAACAGCATA
RFWD3_2325.199	GGACCACGGTATTTGTCTCC	GTGGAAAGGACGAAACACCG	GTTTAAGAGCTATGCTGGAAACAGCATA	GTGGAAAGGACGAAACACCGGGACCACGGTATTTGTCTCCGTTTAAGAGCTATGCTGGAAACAGCATA
RFWD3_2325.110	AAACACGAGCAGTCATGTGC	GTGGAAAGGACGAAACACCG	GTTTAAGAGCTATGCTGGAAACAGCATA	GTGGAAAGGACGAAACACCGAAACACGAGCAGTCATGTGCGTTTAAGAGCTATGCTGGAAACAGCATA
RFWD3_2325.176	CATCAGCACACTTCGTATGG	GTGGAAAGGACGAAACACCG	GTTTAAGAGCTATGCTGGAAACAGCATA	GTGGAAAGGACGAAACACCGCATCAGCACACTTCGTATGGGTTTAAGAGCTATGCTGGAAACAGCATA
RFWD3_2325.157	ACACAGGCTGATCGGTCTGT	GTGGAAAGGACGAAACACCG	GTTTAAGAGCTATGCTGGAAACAGCATA	GTGGAAAGGACGAAACACCGACACAGGCTGATCGGTCTGTGTTTAAGAGCTATGCTGGAAACAGCATA
RFWD3_2325.107	TAACTACATCTATGCTGGAC	GTGGAAAGGACGAAACACCG	GTTTAAGAGCTATGCTGGAAACAGCATA	GTGGAAAGGACGAAACACCGTAACTACATCTATGCTGGACGTTTAAGAGCTATGCTGGAAACAGCATA
RFWD3_2325.116	ATTTCCATATGGTGGGGTGC	GTGGAAAGGACGAAACACCG	GTTTAAGAGCTATGCTGGAAACAGCATA	GTGGAAAGGACGAAACACCGATTTCCATATGGTGGGGTGCGTTTAAGAGCTATGCTGGAAACAGCATA
RING1_1221.7	ACTCATGTGCCCTATCTGCC	GTGGAAAGGACGAAACACCG	GTTTAAGAGCTATGCTGGAAACAGCATA	GTGGAAAGGACGAAACACCGACTCATGTGCCCTATCTGCCGTTTAAGAGCTATGCTGGAAACAGCATA
RING1_1221.262	TTCAGCATGTCCAGGCAGAT	GTGGAAAGGACGAAACACCG	GTTTAAGAGCTATGCTGGAAACAGCATA	GTGGAAAGGACGAAACACCGTTCAGCATGTCCAGGCAGATGTTTAAGAGCTATGCTGGAAACAGCATA
RING1_1221.261	TCGTATTCTTCAGCATGTCC	GTGGAAAGGACGAAACACCG	GTTTAAGAGCTATGCTGGAAACAGCATA	GTGGAAAGGACGAAACACCGTCGTATTCTTCAGCATGTCCGTTTAAGAGCTATGCTGGAAACAGCATA
RING1_1221.259	GAATCTGTGGAGGCACTCCT	GTGGAAAGGACGAAACACCG	GTTTAAGAGCTATGCTGGAAACAGCATA	GTGGAAAGGACGAAACACCGGAATCTGTGGAGGCACTCCTGTTTAAGAGCTATGCTGGAAACAGCATA
RING1_1221.10	ATTGTCACAGCCCTACGGAG	GTGGAAAGGACGAAACACCG	GTTTAAGAGCTATGCTGGAAACAGCATA	GTGGAAAGGACGAAACACCGATTGTCACAGCCCTACGGAGGTTTAAGAGCTATGCTGGAAACAGCATA
RING1_1221.254	ACCAGCTTCTTTCGGCAGGT	GTGGAAAGGACGAAACACCG	GTTTAAGAGCTATGCTGGAAACAGCATA	GTGGAAAGGACGAAACACCGACCAGCTTCTTTCGGCAGGTGTTTAAGAGCTATGCTGGAAACAGCATA
RING1_1221.13	TCCTACCTGCCGAAAGAAGC	GTGGAAAGGACGAAACACCG	GTTTAAGAGCTATGCTGGAAACAGCATA	GTGGAAAGGACGAAACACCGTCCTACCTGCCGAAAGAAGCGTTTAAGAGCTATGCTGGAAACAGCATA
RING1_1221.238	GGCTCAGGCGGATAAGCACT	GTGGAAAGGACGAAACACCG	GTTTAAGAGCTATGCTGGAAACAGCATA	GTGGAAAGGACGAAACACCGGGCTCAGGCGGATAAGCACTGTTTAAGAGCTATGCTGGAAACAGCATA
RING1_1221.226	TTCCCCCCCACTCATCGTTG	GTGGAAAGGACGAAACACCG	GTTTAAGAGCTATGCTGGAAACAGCATA	GTGGAAAGGACGAAACACCGTTCCCCCCCACTCATCGTTGGTTTAAGAGCTATGCTGGAAACAGCATA
RING1_1221.50	CTCCCAAGCGACCCCGTGGA	GTGGAAAGGACGAAACACCG	GTTTAAGAGCTATGCTGGAAACAGCATA	GTGGAAAGGACGAAACACCGCTCCCAAGCGACCCCGTGGAGTTTAAGAGCTATGCTGGAAACAGCATA
RING1_1221.81	TCGGAAGACTCTGGTGACCG	GTGGAAAGGACGAAACACCG	GTTTAAGAGCTATGCTGGAAACAGCATA	GTGGAAAGGACGAAACACCGTCGGAAGACTCTGGTGACCGGTTTAAGAGCTATGCTGGAAACAGCATA
RING1_1221.97	GAGAAATTGAGCTCGTGTTC	GTGGAAAGGACGAAACACCG	GTTTAAGAGCTATGCTGGAAACAGCATA	GTGGAAAGGACGAAACACCGGAGAAATTGAGCTCGTGTTCGTTTAAGAGCTATGCTGGAAACAGCATA
RLIM_1875.100	TGCAGTGGACATGGTACTCA	GTGGAAAGGACGAAACACCG	GTTTAAGAGCTATGCTGGAAACAGCATA	GTGGAAAGGACGAAACACCGTGCAGTGGACATGGTACTCAGTTTAAGAGCTATGCTGGAAACAGCATA
RLIM_1875.99	AGCGATCGATGCAGTGGACA	GTGGAAAGGACGAAACACCG	GTTTAAGAGCTATGCTGGAAACAGCATA	GTGGAAAGGACGAAACACCGAGCGATCGATGCAGTGGACAGTTTAAGAGCTATGCTGGAAACAGCATA
RLIM_1875.98	ATAACCAGCGATCGATGCAG	GTGGAAAGGACGAAACACCG	GTTTAAGAGCTATGCTGGAAACAGCATA	GTGGAAAGGACGAAACACCGATAACCAGCGATCGATGCAGGTTTAAGAGCTATGCTGGAAACAGCATA
RLIM_1875.94	ATGTCCACTGCATCGATCGC	GTGGAAAGGACGAAACACCG	GTTTAAGAGCTATGCTGGAAACAGCATA	GTGGAAAGGACGAAACACCGATGTCCACTGCATCGATCGCGTTTAAGAGCTATGCTGGAAACAGCATA
RNF10_2436.24	TTTAGCCCTGCCCAGTTCTC	GTGGAAAGGACGAAACACCG	GTTTAAGAGCTATGCTGGAAACAGCATA	GTGGAAAGGACGAAACACCGTTTAGCCCTGCCCAGTTCTCGTTTAAGAGCTATGCTGGAAACAGCATA
RNF10_2436.25	AATTTCACTTTTGAACCCCG	GTGGAAAGGACGAAACACCG	GTTTAAGAGCTATGCTGGAAACAGCATA	GTGGAAAGGACGAAACACCGAATTTCACTTTTGAACCCCGGTTTAAGAGCTATGCTGGAAACAGCATA
RNF10_2436.27	TTTGAACCCCGTGGCCAGAC	GTGGAAAGGACGAAACACCG	GTTTAAGAGCTATGCTGGAAACAGCATA	GTGGAAAGGACGAAACACCGTTTGAACCCCGTGGCCAGACGTTTAAGAGCTATGCTGGAAACAGCATA
RNF10_2436.288	CAAAGTGACCCGTCTGGCCA	GTGGAAAGGACGAAACACCG	GTTTAAGAGCTATGCTGGAAACAGCATA	GTGGAAAGGACGAAACACCGCAAAGTGACCCGTCTGGCCAGTTTAAGAGCTATGCTGGAAACAGCATA
RNF10_2436.28	GGCCAGACGGGTCACTTTGA	GTGGAAAGGACGAAACACCG	GTTTAAGAGCTATGCTGGAAACAGCATA	GTGGAAAGGACGAAACACCGGGCCAGACGGGTCACTTTGAGTTTAAGAGCTATGCTGGAAACAGCATA
RNF10_2436.32	AGGCAGTGGACATGGTAGCT	GTGGAAAGGACGAAACACCG	GTTTAAGAGCTATGCTGGAAACAGCATA	GTGGAAAGGACGAAACACCGAGGCAGTGGACATGGTAGCTGTTTAAGAGCTATGCTGGAAACAGCATA
RNF10_2436.279	TAGGTGGATAGAGGCATATT	GTGGAAAGGACGAAACACCG	GTTTAAGAGCTATGCTGGAAACAGCATA	GTGGAAAGGACGAAACACCGTAGGTGGATAGAGGCATATTGTTTAAGAGCTATGCTGGAAACAGCATA
RNF10_2436.276	GTTATCTTGGCTGCAGTAGG	GTGGAAAGGACGAAACACCG	GTTTAAGAGCTATGCTGGAAACAGCATA	GTGGAAAGGACGAAACACCGGTTATCTTGGCTGCAGTAGGGTTTAAGAGCTATGCTGGAAACAGCATA
RNF10_2436.274	GTGTCCACAACGGGTTATCT	GTGGAAAGGACGAAACACCG	GTTTAAGAGCTATGCTGGAAACAGCATA	GTGGAAAGGACGAAACACCGGTGTCCACAACGGGTTATCTGTTTAAGAGCTATGCTGGAAACAGCATA
RNF10_2436.44	GCAGCCAAGATAACCCGTTG	GTGGAAAGGACGAAACACCG	GTTTAAGAGCTATGCTGGAAACAGCATA	GTGGAAAGGACGAAACACCGGCAGCCAAGATAACCCGTTGGTTTAAGAGCTATGCTGGAAACAGCATA
RNF10_2436.45	GTTGTGGACACATCTTCTGC	GTGGAAAGGACGAAACACCG	GTTTAAGAGCTATGCTGGAAACAGCATA	GTGGAAAGGACGAAACACCGGTTGTGGACACATCTTCTGCGTTTAAGAGCTATGCTGGAAACAGCATA
RNF10_2436.271	CACTCAGTGAAAGATAGTGC	GTGGAAAGGACGAAACACCG	GTTTAAGAGCTATGCTGGAAACAGCATA	GTGGAAAGGACGAAACACCGCACTCAGTGAAAGATAGTGCGTTTAAGAGCTATGCTGGAAACAGCATA
RNF103_2058.121	GAATTGCATTGTGATGTGGT	GTGGAAAGGACGAAACACCG	GTTTAAGAGCTATGCTGGAAACAGCATA	GTGGAAAGGACGAAACACCGGAATTGCATTGTGATGTGGTGTTTAAGAGCTATGCTGGAAACAGCATA
RNF103_2058.212	AAAACCTGGCCAGGACGAAC	GTGGAAAGGACGAAACACCG	GTTTAAGAGCTATGCTGGAAACAGCATA	GTGGAAAGGACGAAACACCGAAAACCTGGCCAGGACGAACGTTTAAGAGCTATGCTGGAAACAGCATA
RNF103_2058.171	AGCTGTAAAAAGCCCAACAC	GTGGAAAGGACGAAACACCG	GTTTAAGAGCTATGCTGGAAACAGCATA	GTGGAAAGGACGAAACACCGAGCTGTAAAAAGCCCAACACGTTTAAGAGCTATGCTGGAAACAGCATA
RNF103_2058.119	TTGCTAATGGGGTTGCCTTG	GTGGAAAGGACGAAACACCG	GTTTAAGAGCTATGCTGGAAACAGCATA	GTGGAAAGGACGAAACACCGTTGCTAATGGGGTTGCCTTGGTTTAAGAGCTATGCTGGAAACAGCATA
RNF103_2058.123	GCATTGTGATGTGGTTGGCT	GTGGAAAGGACGAAACACCG	GTTTAAGAGCTATGCTGGAAACAGCATA	GTGGAAAGGACGAAACACCGGCATTGTGATGTGGTTGGCTGTTTAAGAGCTATGCTGGAAACAGCATA
RNF103_2058.124	CATTGTGATGTGGTTGGCTG	GTGGAAAGGACGAAACACCG	GTTTAAGAGCTATGCTGGAAACAGCATA	GTGGAAAGGACGAAACACCGCATTGTGATGTGGTTGGCTGGTTTAAGAGCTATGCTGGAAACAGCATA
RNF103_2058.136	GGCAAACAGGGCAACAATGT	GTGGAAAGGACGAAACACCG	GTTTAAGAGCTATGCTGGAAACAGCATA	GTGGAAAGGACGAAACACCGGGCAAACAGGGCAACAATGTGTTTAAGAGCTATGCTGGAAACAGCATA
RNF103_2058.127	ATTGTTGCCCTGTTTGCCGG	GTGGAAAGGACGAAACACCG	GTTTAAGAGCTATGCTGGAAACAGCATA	GTGGAAAGGACGAAACACCGATTGTTGCCCTGTTTGCCGGGTTTAAGAGCTATGCTGGAAACAGCATA
RNF103_2058.134	TAAGAAGGCCACCGGCAAAC	GTGGAAAGGACGAAACACCG	GTTTAAGAGCTATGCTGGAAACAGCATA	GTGGAAAGGACGAAACACCGTAAGAAGGCCACCGGCAAACGTTTAAGAGCTATGCTGGAAACAGCATA
RNF103_2058.116	TGAAAATGGATGTTTGCTAA	GTGGAAAGGACGAAACACCG	GTTTAAGAGCTATGCTGGAAACAGCATA	GTGGAAAGGACGAAACACCGTGAAAATGGATGTTTGCTAAGTTTAAGAGCTATGCTGGAAACAGCATA
RNF11_465.36	TGCACGGCAGAAATCGAATT	GTGGAAAGGACGAAACACCG	GTTTAAGAGCTATGCTGGAAACAGCATA	GTGGAAAGGACGAAACACCGTGCACGGCAGAAATCGAATTGTTTAAGAGCTATGCTGGAAACAGCATA
RNF11_465.35	ATGCACGGCAGAAATCGAAT	GTGGAAAGGACGAAACACCG	GTTTAAGAGCTATGCTGGAAACAGCATA	GTGGAAAGGACGAAACACCGATGCACGGCAGAAATCGAATGTTTAAGAGCTATGCTGGAAACAGCATA
RNF11_465.34	AGGTGATAGATGTGCATGCA	GTGGAAAGGACGAAACACCG	GTTTAAGAGCTATGCTGGAAACAGCATA	GTGGAAAGGACGAAACACCGAGGTGATAGATGTGCATGCAGTTTAAGAGCTATGCTGGAAACAGCATA
RNF11_465.24	GTGCATGCACATCTATCACC	GTGGAAAGGACGAAACACCG	GTTTAAGAGCTATGCTGGAAACAGCATA	GTGGAAAGGACGAAACACCGGTGCATGCACATCTATCACCGTTTAAGAGCTATGCTGGAAACAGCATA
RNF11_465.33	ACCAGTCATCTATACAGTCC	GTGGAAAGGACGAAACACCG	GTTTAAGAGCTATGCTGGAAACAGCATA	GTGGAAAGGACGAAACACCGACCAGTCATCTATACAGTCCGTTTAAGAGCTATGCTGGAAACAGCATA
RNF11_465.25	ACCTGGACTGTATAGATGAC	GTGGAAAGGACGAAACACCG	GTTTAAGAGCTATGCTGGAAACAGCATA	GTGGAAAGGACGAAACACCGACCTGGACTGTATAGATGACGTTTAAGAGCTATGCTGGAAACAGCATA
RNF111_2988.5	TTTTGCATCCAGAGCCCATT	GTGGAAAGGACGAAACACCG	GTTTAAGAGCTATGCTGGAAACAGCATA	GTGGAAAGGACGAAACACCGTTTTGCATCCAGAGCCCATTGTTTAAGAGCTATGCTGGAAACAGCATA
RNF111_2988.19	ACCAGGGAATATTAGGACTG	GTGGAAAGGACGAAACACCG	GTTTAAGAGCTATGCTGGAAACAGCATA	GTGGAAAGGACGAAACACCGACCAGGGAATATTAGGACTGGTTTAAGAGCTATGCTGGAAACAGCATA
RNF111_2988.26	CACGGTCTCATAAGTGGCCT	GTGGAAAGGACGAAACACCG	GTTTAAGAGCTATGCTGGAAACAGCATA	GTGGAAAGGACGAAACACCGCACGGTCTCATAAGTGGCCTGTTTAAGAGCTATGCTGGAAACAGCATA
RNF111_2988.311	TCTTCATTGGCAGTAACCTG	GTGGAAAGGACGAAACACCG	GTTTAAGAGCTATGCTGGAAACAGCATA	GTGGAAAGGACGAAACACCGTCTTCATTGGCAGTAACCTGGTTTAAGAGCTATGCTGGAAACAGCATA
RNF111_2988.48	AGGAGCCACGGAACCGCAGT	GTGGAAAGGACGAAACACCG	GTTTAAGAGCTATGCTGGAAACAGCATA	GTGGAAAGGACGAAACACCGAGGAGCCACGGAACCGCAGTGTTTAAGAGCTATGCTGGAAACAGCATA
RNF111_2988.144	TGGTGGAAAAGGTGCATACA	GTGGAAAGGACGAAACACCG	GTTTAAGAGCTATGCTGGAAACAGCATA	GTGGAAAGGACGAAACACCGTGGTGGAAAAGGTGCATACAGTTTAAGAGCTATGCTGGAAACAGCATA
RNF111_2988.142	ATTGGTCAACACACACTTGG	GTGGAAAGGACGAAACACCG	GTTTAAGAGCTATGCTGGAAACAGCATA	GTGGAAAGGACGAAACACCGATTGGTCAACACACACTTGGGTTTAAGAGCTATGCTGGAAACAGCATA
RNF111_2988.141	ACCATTGGTCAACACACACT	GTGGAAAGGACGAAACACCG	GTTTAAGAGCTATGCTGGAAACAGCATA	GTGGAAAGGACGAAACACCGACCATTGGTCAACACACACTGTTTAAGAGCTATGCTGGAAACAGCATA
RNF111_2988.132	ACCAAGTGTGTGTTGACCAA	GTGGAAAGGACGAAACACCG	GTTTAAGAGCTATGCTGGAAACAGCATA	GTGGAAAGGACGAAACACCGACCAAGTGTGTGTTGACCAAGTTTAAGAGCTATGCTGGAAACAGCATA
RNF111_2988.139	GCATATGGGGCACTTCTTAT	GTGGAAAGGACGAAACACCG	GTTTAAGAGCTATGCTGGAAACAGCATA	GTGGAAAGGACGAAACACCGGCATATGGGGCACTTCTTATGTTTAAGAGCTATGCTGGAAACAGCATA
RNF111_2988.137	TCAATGTCCACTCTGCATAT	GTGGAAAGGACGAAACACCG	GTTTAAGAGCTATGCTGGAAACAGCATA	GTGGAAAGGACGAAACACCGTCAATGTCCACTCTGCATATGTTTAAGAGCTATGCTGGAAACAGCATA
RNF112_1896.387	TGGGGTCGCGCAACCTCTCC	GTGGAAAGGACGAAACACCG	GTTTAAGAGCTATGCTGGAAACAGCATA	GTGGAAAGGACGAAACACCGTGGGGTCGCGCAACCTCTCCGTTTAAGAGCTATGCTGGAAACAGCATA
RNF112_1896.18	GTTGCGCGACCCCATCTCGC	GTGGAAAGGACGAAACACCG	GTTTAAGAGCTATGCTGGAAACAGCATA	GTGGAAAGGACGAAACACCGGTTGCGCGACCCCATCTCGCGTTTAAGAGCTATGCTGGAAACAGCATA
RNF112_1896.385	TGGCCACAGTCCAGCGAGAT	GTGGAAAGGACGAAACACCG	GTTTAAGAGCTATGCTGGAAACAGCATA	GTGGAAAGGACGAAACACCGTGGCCACAGTCCAGCGAGATGTTTAAGAGCTATGCTGGAAACAGCATA
RNF112_1896.20	GTGGCCACGACTTCTGCATA	GTGGAAAGGACGAAACACCG	GTTTAAGAGCTATGCTGGAAACAGCATA	GTGGAAAGGACGAAACACCGGTGGCCACGACTTCTGCATAGTTTAAGAGCTATGCTGGAAACAGCATA
RNF112_1896.21	CTTCAGCACACACCGTCTCC	GTGGAAAGGACGAAACACCG	GTTTAAGAGCTATGCTGGAAACAGCATA	GTGGAAAGGACGAAACACCGCTTCAGCACACACCGTCTCCGTTTAAGAGCTATGCTGGAAACAGCATA
RNF112_1896.378	TTCCGGCACTCAGGACAGCA	GTGGAAAGGACGAAACACCG	GTTTAAGAGCTATGCTGGAAACAGCATA	GTGGAAAGGACGAAACACCGTTCCGGCACTCAGGACAGCAGTTTAAGAGCTATGCTGGAAACAGCATA
RNF112_1896.376	TTGCATATCTTCCGGCACTC	GTGGAAAGGACGAAACACCG	GTTTAAGAGCTATGCTGGAAACAGCATA	GTGGAAAGGACGAAACACCGTTGCATATCTTCCGGCACTCGTTTAAGAGCTATGCTGGAAACAGCATA
RNF112_1896.336	ACATCCATATGCCCCTGGCG	GTGGAAAGGACGAAACACCG	GTTTAAGAGCTATGCTGGAAACAGCATA	GTGGAAAGGACGAAACACCGACATCCATATGCCCCTGGCGGTTTAAGAGCTATGCTGGAAACAGCATA
RNF112_1896.314	GGGATGAGTCACGAACTAAG	GTGGAAAGGACGAAACACCG	GTTTAAGAGCTATGCTGGAAACAGCATA	GTGGAAAGGACGAAACACCGGGGATGAGTCACGAACTAAGGTTTAAGAGCTATGCTGGAAACAGCATA
RNF112_1896.126	TGATGACTTCCGCCACCTTC	GTGGAAAGGACGAAACACCG	GTTTAAGAGCTATGCTGGAAACAGCATA	GTGGAAAGGACGAAACACCGTGATGACTTCCGCCACCTTCGTTTAAGAGCTATGCTGGAAACAGCATA
RNF112_1896.196	GCTGTGGGGGCCGGGCTCAT	GTGGAAAGGACGAAACACCG	GTTTAAGAGCTATGCTGGAAACAGCATA	GTGGAAAGGACGAAACACCGGCTGTGGGGGCCGGGCTCATGTTTAAGAGCTATGCTGGAAACAGCATA
RNF113A_1032.133	CTGCCGCTTTCTCCGGGCTC	GTGGAAAGGACGAAACACCG	GTTTAAGAGCTATGCTGGAAACAGCATA	GTGGAAAGGACGAAACACCGCTGCCGCTTTCTCCGGGCTCGTTTAAGAGCTATGCTGGAAACAGCATA
RNF113A_1032.30	ACCCGTTCGGCGAAACCCGT	GTGGAAAGGACGAAACACCG	GTTTAAGAGCTATGCTGGAAACAGCATA	GTGGAAAGGACGAAACACCGACCCGTTCGGCGAAACCCGTGTTTAAGAGCTATGCTGGAAACAGCATA
RNF113A_1032.107	TAGATGCTCGGGCGCTCGGA	GTGGAAAGGACGAAACACCG	GTTTAAGAGCTATGCTGGAAACAGCATA	GTGGAAAGGACGAAACACCGTAGATGCTCGGGCGCTCGGAGTTTAAGAGCTATGCTGGAAACAGCATA
RNF113A_1032.98	TGTAATCTGAACGGTCATGG	GTGGAAAGGACGAAACACCG	GTTTAAGAGCTATGCTGGAAACAGCATA	GTGGAAAGGACGAAACACCGTGTAATCTGAACGGTCATGGGTTTAAGAGCTATGCTGGAAACAGCATA
RNF113A_1032.63	GATCGAACGTGAGCTTGATG	GTGGAAAGGACGAAACACCG	GTTTAAGAGCTATGCTGGAAACAGCATA	GTGGAAAGGACGAAACACCGGATCGAACGTGAGCTTGATGGTTTAAGAGCTATGCTGGAAACAGCATA
RNF113A_1032.95	CGACAGATGAAACACTTGAA	GTGGAAAGGACGAAACACCG	GTTTAAGAGCTATGCTGGAAACAGCATA	GTGGAAAGGACGAAACACCGCGACAGATGAAACACTTGAAGTTTAAGAGCTATGCTGGAAACAGCATA
RNF113A_1032.94	CAACTGGGTTTTGGAAGCTC	GTGGAAAGGACGAAACACCG	GTTTAAGAGCTATGCTGGAAACAGCATA	GTGGAAAGGACGAAACACCGCAACTGGGTTTTGGAAGCTCGTTTAAGAGCTATGCTGGAAACAGCATA
RNF113A_1032.89	CATAGCAGCGCGGGGTGGTG	GTGGAAAGGACGAAACACCG	GTTTAAGAGCTATGCTGGAAACAGCATA	GTGGAAAGGACGAAACACCGCATAGCAGCGCGGGGTGGTGGTTTAAGAGCTATGCTGGAAACAGCATA
RNF113A_1032.88	ACAGACATAGCAGCGCGGGG	GTGGAAAGGACGAAACACCG	GTTTAAGAGCTATGCTGGAAACAGCATA	GTGGAAAGGACGAAACACCGACAGACATAGCAGCGCGGGGGTTTAAGAGCTATGCTGGAAACAGCATA
RNF113A_1032.87	GTCACAGACATAGCAGCGCG	GTGGAAAGGACGAAACACCG	GTTTAAGAGCTATGCTGGAAACAGCATA	GTGGAAAGGACGAAACACCGGTCACAGACATAGCAGCGCGGTTTAAGAGCTATGCTGGAAACAGCATA
RNF113A_1032.84	TGAAGACGCCATTGGTCTGC	GTGGAAAGGACGAAACACCG	GTTTAAGAGCTATGCTGGAAACAGCATA	GTGGAAAGGACGAAACACCGTGAAGACGCCATTGGTCTGCGTTTAAGAGCTATGCTGGAAACAGCATA
RNF113A_1032.72	CTAGAGAAGCATCGAGCTAC	GTGGAAAGGACGAAACACCG	GTTTAAGAGCTATGCTGGAAACAGCATA	GTGGAAAGGACGAAACACCGCTAGAGAAGCATCGAGCTACGTTTAAGAGCTATGCTGGAAACAGCATA
RNF113B_969.135	CAGATGCCCTGGCGCACGTA	GTGGAAAGGACGAAACACCG	GTTTAAGAGCTATGCTGGAAACAGCATA	GTGGAAAGGACGAAACACCGCAGATGCCCTGGCGCACGTAGTTTAAGAGCTATGCTGGAAACAGCATA
RNF113B_969.130	TGTAATCGGAACGGTCGTGG	GTGGAAAGGACGAAACACCG	GTTTAAGAGCTATGCTGGAAACAGCATA	GTGGAAAGGACGAAACACCGTGTAATCGGAACGGTCGTGGGTTTAAGAGCTATGCTGGAAACAGCATA
RNF113B_969.85	GTTCCGATTACAAGCTCGGG	GTGGAAAGGACGAAACACCG	GTTTAAGAGCTATGCTGGAAACAGCATA	GTGGAAAGGACGAAACACCGGTTCCGATTACAAGCTCGGGGTTTAAGAGCTATGCTGGAAACAGCATA
RNF113B_969.97	CAGGTGTTTCATATGTCGCC	GTGGAAAGGACGAAACACCG	GTTTAAGAGCTATGCTGGAAACAGCATA	GTGGAAAGGACGAAACACCGCAGGTGTTTCATATGTCGCCGTTTAAGAGCTATGCTGGAAACAGCATA
RNF113B_969.123	GGTGACGACTGGGTTTTGGA	GTGGAAAGGACGAAACACCG	GTTTAAGAGCTATGCTGGAAACAGCATA	GTGGAAAGGACGAAACACCGGGTGACGACTGGGTTTTGGAGTTTAAGAGCTATGCTGGAAACAGCATA
RNF113B_969.99	TTTCTGCGAGAGCTGCGCGC	GTGGAAAGGACGAAACACCG	GTTTAAGAGCTATGCTGGAAACAGCATA	GTGGAAAGGACGAAACACCGTTTCTGCGAGAGCTGCGCGCGTTTAAGAGCTATGCTGGAAACAGCATA
RNF113B_969.100	GCTGCGCGCTGGAGCACTTC	GTGGAAAGGACGAAACACCG	GTTTAAGAGCTATGCTGGAAACAGCATA	GTGGAAAGGACGAAACACCGGCTGCGCGCTGGAGCACTTCGTTTAAGAGCTATGCTGGAAACAGCATA
RNF113B_969.116	GTCACAGATGTAGCAGCGCG	GTGGAAAGGACGAAACACCG	GTTTAAGAGCTATGCTGGAAACAGCATA	GTGGAAAGGACGAAACACCGGTCACAGATGTAGCAGCGCGGTTTAAGAGCTATGCTGGAAACAGCATA
RNF113B_969.102	TACATCTGTGACCAGCCAAC	GTGGAAAGGACGAAACACCG	GTTTAAGAGCTATGCTGGAAACAGCATA	GTGGAAAGGACGAAACACCGTACATCTGTGACCAGCCAACGTTTAAGAGCTATGCTGGAAACAGCATA
RNF113B_969.110	TCGCCATCAGTTCTTTGGCG	GTGGAAAGGACGAAACACCG	GTTTAAGAGCTATGCTGGAAACAGCATA	GTGGAAAGGACGAAACACCGTCGCCATCAGTTCTTTGGCGGTTTAAGAGCTATGCTGGAAACAGCATA
RNF114_687.88	TCGTACACCTCTAAGCACAC	GTGGAAAGGACGAAACACCG	GTTTAAGAGCTATGCTGGAAACAGCATA	GTGGAAAGGACGAAACACCGTCGTACACCTCTAAGCACACGTTTAAGAGCTATGCTGGAAACAGCATA
RNF114_687.14	CTTAGAGGTGTACGAGAAGC	GTGGAAAGGACGAAACACCG	GTTTAAGAGCTATGCTGGAAACAGCATA	GTGGAAAGGACGAAACACCGCTTAGAGGTGTACGAGAAGCGTTTAAGAGCTATGCTGGAAACAGCATA
RNF114_687.15	GGTGTACGAGAAGCCGGTAC	GTGGAAAGGACGAAACACCG	GTTTAAGAGCTATGCTGGAAACAGCATA	GTGGAAAGGACGAAACACCGGGTGTACGAGAAGCCGGTACGTTTAAGAGCTATGCTGGAAACAGCATA
RNF114_687.86	TGTCCGCAGGGCACCTGTAC	GTGGAAAGGACGAAACACCG	GTTTAAGAGCTATGCTGGAAACAGCATA	GTGGAAAGGACGAAACACCGTGTCCGCAGGGCACCTGTACGTTTAAGAGCTATGCTGGAAACAGCATA
RNF114_687.16	AAGCCGGTACAGGTGCCCTG	GTGGAAAGGACGAAACACCG	GTTTAAGAGCTATGCTGGAAACAGCATA	GTGGAAAGGACGAAACACCGAAGCCGGTACAGGTGCCCTGGTTTAAGAGCTATGCTGGAAACAGCATA
RNF114_687.83	TCGGCTTCAGACATTCCTGC	GTGGAAAGGACGAAACACCG	GTTTAAGAGCTATGCTGGAAACAGCATA	GTGGAAAGGACGAAACACCGTCGGCTTCAGACATTCCTGCGTTTAAGAGCTATGCTGGAAACAGCATA
RNF114_687.18	AAGCCGAAGAAGCCTGTCTG	GTGGAAAGGACGAAACACCG	GTTTAAGAGCTATGCTGGAAACAGCATA	GTGGAAAGGACGAAACACCGAAGCCGAAGAAGCCTGTCTGGTTTAAGAGCTATGCTGGAAACAGCATA
RNF114_687.21	TGGGGTGTGTCGCAGCGCTC	GTGGAAAGGACGAAACACCG	GTTTAAGAGCTATGCTGGAAACAGCATA	GTGGAAAGGACGAAACACCGTGGGGTGTGTCGCAGCGCTCGTTTAAGAGCTATGCTGGAAACAGCATA
RNF114_687.59	CAGATTTGGTATCCGTGCTA	GTGGAAAGGACGAAACACCG	GTTTAAGAGCTATGCTGGAAACAGCATA	GTGGAAAGGACGAAACACCGCAGATTTGGTATCCGTGCTAGTTTAAGAGCTATGCTGGAAACAGCATA
RNF114_687.52	AAGTTGGCGCTGCGGTAGTT	GTGGAAAGGACGAAACACCG	GTTTAAGAGCTATGCTGGAAACAGCATA	GTGGAAAGGACGAAACACCGAAGTTGGCGCTGCGGTAGTTGTTTAAGAGCTATGCTGGAAACAGCATA
RNF115_915.11	ATATGTCCCAGATGTGAATC	GTGGAAAGGACGAAACACCG	GTTTAAGAGCTATGCTGGAAACAGCATA	GTGGAAAGGACGAAACACCGATATGTCCCAGATGTGAATCGTTTAAGAGCTATGCTGGAAACAGCATA
RNF115_915.104	AATAAAGCCTGATTCACATC	GTGGAAAGGACGAAACACCG	GTTTAAGAGCTATGCTGGAAACAGCATA	GTGGAAAGGACGAAACACCGAATAAAGCCTGATTCACATCGTTTAAGAGCTATGCTGGAAACAGCATA
RNF115_915.69	GTGTAATCTTCTTTGCATAC	GTGGAAAGGACGAAACACCG	GTTTAAGAGCTATGCTGGAAACAGCATA	GTGGAAAGGACGAAACACCGGTGTAATCTTCTTTGCATACGTTTAAGAGCTATGCTGGAAACAGCATA
RNF115_915.68	AGTGATTGCAAGGTAACTGC	GTGGAAAGGACGAAACACCG	GTTTAAGAGCTATGCTGGAAACAGCATA	GTGGAAAGGACGAAACACCGAGTGATTGCAAGGTAACTGCGTTTAAGAGCTATGCTGGAAACAGCATA
RNF115_915.67	CTGTGAAAGAAGTGATTGCA	GTGGAAAGGACGAAACACCG	GTTTAAGAGCTATGCTGGAAACAGCATA	GTGGAAAGGACGAAACACCGCTGTGAAAGAAGTGATTGCAGTTTAAGAGCTATGCTGGAAACAGCATA
RNF115_915.56	ACAGCAGTTGTATTGTGCCG	GTGGAAAGGACGAAACACCG	GTTTAAGAGCTATGCTGGAAACAGCATA	GTGGAAAGGACGAAACACCGACAGCAGTTGTATTGTGCCGGTTTAAGAGCTATGCTGGAAACAGCATA
RNF115_915.65	TTTAAGCTCTTCCTACATAC	GTGGAAAGGACGAAACACCG	GTTTAAGAGCTATGCTGGAAACAGCATA	GTGGAAAGGACGAAACACCGTTTAAGCTCTTCCTACATACGTTTAAGAGCTATGCTGGAAACAGCATA
RNF115_915.58	GTATGTAGGAAGAGCTTAAA	GTGGAAAGGACGAAACACCG	GTTTAAGAGCTATGCTGGAAACAGCATA	GTGGAAAGGACGAAACACCGGTATGTAGGAAGAGCTTAAAGTTTAAGAGCTATGCTGGAAACAGCATA
RNF121_984.122	CCACCACCAAGGTTGCGATG	GTGGAAAGGACGAAACACCG	GTTTAAGAGCTATGCTGGAAACAGCATA	GTGGAAAGGACGAAACACCGCCACCACCAAGGTTGCGATGGTTTAAGAGCTATGCTGGAAACAGCATA
RNF121_984.108	GGTGGCTCGGAAGGTAACAA	GTGGAAAGGACGAAACACCG	GTTTAAGAGCTATGCTGGAAACAGCATA	GTGGAAAGGACGAAACACCGGGTGGCTCGGAAGGTAACAAGTTTAAGAGCTATGCTGGAAACAGCATA
RNF121_984.51	CTTTGTGGACGTCAGTGAAG	GTGGAAAGGACGAAACACCG	GTTTAAGAGCTATGCTGGAAACAGCATA	GTGGAAAGGACGAAACACCGCTTTGTGGACGTCAGTGAAGGTTTAAGAGCTATGCTGGAAACAGCATA
RNF121_984.52	TTTGTGGACGTCAGTGAAGA	GTGGAAAGGACGAAACACCG	GTTTAAGAGCTATGCTGGAAACAGCATA	GTGGAAAGGACGAAACACCGTTTGTGGACGTCAGTGAAGAGTTTAAGAGCTATGCTGGAAACAGCATA
RNF121_984.53	TTGTGGACGTCAGTGAAGAG	GTGGAAAGGACGAAACACCG	GTTTAAGAGCTATGCTGGAAACAGCATA	GTGGAAAGGACGAAACACCGTTGTGGACGTCAGTGAAGAGGTTTAAGAGCTATGCTGGAAACAGCATA
RNF121_984.54	GGATCATTGAGAACACGTAT	GTGGAAAGGACGAAACACCG	GTTTAAGAGCTATGCTGGAAACAGCATA	GTGGAAAGGACGAAACACCGGGATCATTGAGAACACGTATGTTTAAGAGCTATGCTGGAAACAGCATA
RNF121_984.56	ACGAGTTCTGCATCCGTGGC	GTGGAAAGGACGAAACACCG	GTTTAAGAGCTATGCTGGAAACAGCATA	GTGGAAAGGACGAAACACCGACGAGTTCTGCATCCGTGGCGTTTAAGAGCTATGCTGGAAACAGCATA
RNF121_984.57	CATCCGTGGCTGGTGCATCG	GTGGAAAGGACGAAACACCG	GTTTAAGAGCTATGCTGGAAACAGCATA	GTGGAAAGGACGAAACACCGCATCCGTGGCTGGTGCATCGGTTTAAGAGCTATGCTGGAAACAGCATA
RNF121_984.58	ATCCGTGGCTGGTGCATCGT	GTGGAAAGGACGAAACACCG	GTTTAAGAGCTATGCTGGAAACAGCATA	GTGGAAAGGACGAAACACCGATCCGTGGCTGGTGCATCGTGTTTAAGAGCTATGCTGGAAACAGCATA
RNF121_984.71	GTCATCATTGGTGTAGTCCA	GTGGAAAGGACGAAACACCG	GTTTAAGAGCTATGCTGGAAACAGCATA	GTGGAAAGGACGAAACACCGGTCATCATTGGTGTAGTCCAGTTTAAGAGCTATGCTGGAAACAGCATA
RNF122_468.9	TATATGGTCATCTTCGGCAC	GTGGAAAGGACGAAACACCG	GTTTAAGAGCTATGCTGGAAACAGCATA	GTGGAAAGGACGAAACACCGTATATGGTCATCTTCGGCACGTTTAAGAGCTATGCTGGAAACAGCATA
RNF122_468.46	GTCTTCCAGACAGACTGCGC	GTGGAAAGGACGAAACACCG	GTTTAAGAGCTATGCTGGAAACAGCATA	GTGGAAAGGACGAAACACCGGTCTTCCAGACAGACTGCGCGTTTAAGAGCTATGCTGGAAACAGCATA
RNF122_468.20	AGTCTGTCTGGAAGACTTCA	GTGGAAAGGACGAAACACCG	GTTTAAGAGCTATGCTGGAAACAGCATA	GTGGAAAGGACGAAACACCGAGTCTGTCTGGAAGACTTCAGTTTAAGAGCTATGCTGGAAACAGCATA
RNF122_468.45	GGTGAAAGGCGTGTTGGCAC	GTGGAAAGGACGAAACACCG	GTTTAAGAGCTATGCTGGAAACAGCATA	GTGGAAAGGACGAAACACCGGGTGAAAGGCGTGTTGGCACGTTTAAGAGCTATGCTGGAAACAGCATA
RNF122_468.44	CGGTGAAAGGCGTGTTGGCA	GTGGAAAGGACGAAACACCG	GTTTAAGAGCTATGCTGGAAACAGCATA	GTGGAAAGGACGAAACACCGCGGTGAAAGGCGTGTTGGCAGTTTAAGAGCTATGCTGGAAACAGCATA
RNF122_468.40	CAATGGGCTTGTTACACATG	GTGGAAAGGACGAAACACCG	GTTTAAGAGCTATGCTGGAAACAGCATA	GTGGAAAGGACGAAACACCGCAATGGGCTTGTTACACATGGTTTAAGAGCTATGCTGGAAACAGCATA
RNF122_468.39	GCAATGGGCTTGTTACACAT	GTGGAAAGGACGAAACACCG	GTTTAAGAGCTATGCTGGAAACAGCATA	GTGGAAAGGACGAAACACCGGCAATGGGCTTGTTACACATGTTTAAGAGCTATGCTGGAAACAGCATA
RNF123_3945.668	GCCGATCTGCATGAGCCCCT	GTGGAAAGGACGAAACACCG	GTTTAAGAGCTATGCTGGAAACAGCATA	GTGGAAAGGACGAAACACCGGCCGATCTGCATGAGCCCCTGTTTAAGAGCTATGCTGGAAACAGCATA
RNF123_3945.662	GCGCACGCGGTTGCCATCAT	GTGGAAAGGACGAAACACCG	GTTTAAGAGCTATGCTGGAAACAGCATA	GTGGAAAGGACGAAACACCGGCGCACGCGGTTGCCATCATGTTTAAGAGCTATGCTGGAAACAGCATA
RNF123_3945.652	CTGGGAAGTAGGCCATACCC	GTGGAAAGGACGAAACACCG	GTTTAAGAGCTATGCTGGAAACAGCATA	GTGGAAAGGACGAAACACCGCTGGGAAGTAGGCCATACCCGTTTAAGAGCTATGCTGGAAACAGCATA
RNF123_3945.345	ATGGGGTGGGCATAGCAGAT	GTGGAAAGGACGAAACACCG	GTTTAAGAGCTATGCTGGAAACAGCATA	GTGGAAAGGACGAAACACCGATGGGGTGGGCATAGCAGATGTTTAAGAGCTATGCTGGAAACAGCATA
RNF123_3945.344	GATGGGGTGGGCATAGCAGA	GTGGAAAGGACGAAACACCG	GTTTAAGAGCTATGCTGGAAACAGCATA	GTGGAAAGGACGAAACACCGGATGGGGTGGGCATAGCAGAGTTTAAGAGCTATGCTGGAAACAGCATA
RNF123_3945.338	AGGACTTGTGGCCACAGGGC	GTGGAAAGGACGAAACACCG	GTTTAAGAGCTATGCTGGAAACAGCATA	GTGGAAAGGACGAAACACCGAGGACTTGTGGCCACAGGGCGTTTAAGAGCTATGCTGGAAACAGCATA
RNF123_3945.333	CATCAGGTGCTGGTTGATAC	GTGGAAAGGACGAAACACCG	GTTTAAGAGCTATGCTGGAAACAGCATA	GTGGAAAGGACGAAACACCGCATCAGGTGCTGGTTGATACGTTTAAGAGCTATGCTGGAAACAGCATA
RNF123_3945.332	CCTTGTTGTTCATCAGGTGC	GTGGAAAGGACGAAACACCG	GTTTAAGAGCTATGCTGGAAACAGCATA	GTGGAAAGGACGAAACACCGCCTTGTTGTTCATCAGGTGCGTTTAAGAGCTATGCTGGAAACAGCATA
RNF123_3945.322	CCAGCACCTGATGAACAACA	GTGGAAAGGACGAAACACCG	GTTTAAGAGCTATGCTGGAAACAGCATA	GTGGAAAGGACGAAACACCGCCAGCACCTGATGAACAACAGTTTAAGAGCTATGCTGGAAACAGCATA
RNF123_3945.331	AGCAGTCCTTGTTGTTCATC	GTGGAAAGGACGAAACACCG	GTTTAAGAGCTATGCTGGAAACAGCATA	GTGGAAAGGACGAAACACCGAGCAGTCCTTGTTGTTCATCGTTTAAGAGCTATGCTGGAAACAGCATA
RNF125_699.9	CGACTGCGCCGTGTGCCTTG	GTGGAAAGGACGAAACACCG	GTTTAAGAGCTATGCTGGAAACAGCATA	GTGGAAAGGACGAAACACCGCGACTGCGCCGTGTGCCTTGGTTTAAGAGCTATGCTGGAAACAGCATA
RNF125_699.10	AGGTGTTACACCAGCCTGTC	GTGGAAAGGACGAAACACCG	GTTTAAGAGCTATGCTGGAAACAGCATA	GTGGAAAGGACGAAACACCGAGGTGTTACACCAGCCTGTCGTTTAAGAGCTATGCTGGAAACAGCATA
RNF125_699.59	TGGCCACAGCGGGTCCGGAC	GTGGAAAGGACGAAACACCG	GTTTAAGAGCTATGCTGGAAACAGCATA	GTGGAAAGGACGAAACACCGTGGCCACAGCGGGTCCGGACGTTTAAGAGCTATGCTGGAAACAGCATA
RNF125_699.53	CTTTAGACTGGTAGCAATAC	GTGGAAAGGACGAAACACCG	GTTTAAGAGCTATGCTGGAAACAGCATA	GTGGAAAGGACGAAACACCGCTTTAGACTGGTAGCAATACGTTTAAGAGCTATGCTGGAAACAGCATA
RNF125_699.52	CCACTTGTTGTTCTTTAGAC	GTGGAAAGGACGAAACACCG	GTTTAAGAGCTATGCTGGAAACAGCATA	GTGGAAAGGACGAAACACCGCCACTTGTTGTTCTTTAGACGTTTAAGAGCTATGCTGGAAACAGCATA
RNF125_699.13	AGTGGACCTGTCCTTATTGC	GTGGAAAGGACGAAACACCG	GTTTAAGAGCTATGCTGGAAACAGCATA	GTGGAAAGGACGAAACACCGAGTGGACCTGTCCTTATTGCGTTTAAGAGCTATGCTGGAAACAGCATA
RNF125_699.50	GGAAGATATGCCCGGCAATA	GTGGAAAGGACGAAACACCG	GTTTAAGAGCTATGCTGGAAACAGCATA	GTGGAAAGGACGAAACACCGGGAAGATATGCCCGGCAATAGTTTAAGAGCTATGCTGGAAACAGCATA
RNF125_699.25	ACTGTATGAAGACAGCTTGC	GTGGAAAGGACGAAACACCG	GTTTAAGAGCTATGCTGGAAACAGCATA	GTGGAAAGGACGAAACACCGACTGTATGAAGACAGCTTGCGTTTAAGAGCTATGCTGGAAACAGCATA
RNF126_936.190	GCAGTGGCAGAAGTACCGTC	GTGGAAAGGACGAAACACCG	GTTTAAGAGCTATGCTGGAAACAGCATA	GTGGAAAGGACGAAACACCGGCAGTGGCAGAAGTACCGTCGTTTAAGAGCTATGCTGGAAACAGCATA
RNF126_936.188	CAGGCGCGGGACGATCTCCA	GTGGAAAGGACGAAACACCG	GTTTAAGAGCTATGCTGGAAACAGCATA	GTGGAAAGGACGAAACACCGCAGGCGCGGGACGATCTCCAGTTTAAGAGCTATGCTGGAAACAGCATA
RNF126_936.4	ATCTGTCCAAGATGCGAGTC	GTGGAAAGGACGAAACACCG	GTTTAAGAGCTATGCTGGAAACAGCATA	GTGGAAAGGACGAAACACCGATCTGTCCAAGATGCGAGTCGTTTAAGAGCTATGCTGGAAACAGCATA
RNF126_936.183	ATAAAACCAGACTCGCATCT	GTGGAAAGGACGAAACACCG	GTTTAAGAGCTATGCTGGAAACAGCATA	GTGGAAAGGACGAAACACCGATAAAACCAGACTCGCATCTGTTTAAGAGCTATGCTGGAAACAGCATA
RNF126_936.5	ATGCGAGTCTGGTTTTATCG	GTGGAAAGGACGAAACACCG	GTTTAAGAGCTATGCTGGAAACAGCATA	GTGGAAAGGACGAAACACCGATGCGAGTCTGGTTTTATCGGTTTAAGAGCTATGCTGGAAACAGCATA
RNF126_936.6	TGGTTTTATCGAGGAGCTTC	GTGGAAAGGACGAAACACCG	GTTTAAGAGCTATGCTGGAAACAGCATA	GTGGAAAGGACGAAACACCGTGGTTTTATCGAGGAGCTTCGTTTAAGAGCTATGCTGGAAACAGCATA
RNF126_936.175	GGTGGCCGGCTCTGGTCTGT	GTGGAAAGGACGAAACACCG	GTTTAAGAGCTATGCTGGAAACAGCATA	GTGGAAAGGACGAAACACCGGGTGGCCGGCTCTGGTCTGTGTTTAAGAGCTATGCTGGAAACAGCATA
RNF126_936.62	ACGCGCTGGGTGAGCGTGTG	GTGGAAAGGACGAAACACCG	GTTTAAGAGCTATGCTGGAAACAGCATA	GTGGAAAGGACGAAACACCGACGCGCTGGGTGAGCGTGTGGTTTAAGAGCTATGCTGGAAACAGCATA
RNF126_936.95	CGATGCAGCCGTCGTGGAAC	GTGGAAAGGACGAAACACCG	GTTTAAGAGCTATGCTGGAAACAGCATA	GTGGAAAGGACGAAACACCGCGATGCAGCCGTCGTGGAACGTTTAAGAGCTATGCTGGAAACAGCATA
RNF126_936.94	AGGGCACGATGCAGCCGTCG	GTGGAAAGGACGAAACACCG	GTTTAAGAGCTATGCTGGAAACAGCATA	GTGGAAAGGACGAAACACCGAGGGCACGATGCAGCCGTCGGTTTAAGAGCTATGCTGGAAACAGCATA
RNF126_936.64	ACGACGGCTGCATCGTGCCC	GTGGAAAGGACGAAACACCG	GTTTAAGAGCTATGCTGGAAACAGCATA	GTGGAAAGGACGAAACACCGACGACGGCTGCATCGTGCCCGTTTAAGAGCTATGCTGGAAACAGCATA
RNF126_936.65	CGGCTGCATCGTGCCCTGGC	GTGGAAAGGACGAAACACCG	GTTTAAGAGCTATGCTGGAAACAGCATA	GTGGAAAGGACGAAACACCGCGGCTGCATCGTGCCCTGGCGTTTAAGAGCTATGCTGGAAACAGCATA
RNF126_936.88	TCTGTCCCGTGAGGCTTTTT	GTGGAAAGGACGAAACACCG	GTTTAAGAGCTATGCTGGAAACAGCATA	GTGGAAAGGACGAAACACCGTCTGTCCCGTGAGGCTTTTTGTTTAAGAGCTATGCTGGAAACAGCATA
RNF126_936.70	ACGAACCCCCCTGGCCTCAC	GTGGAAAGGACGAAACACCG	GTTTAAGAGCTATGCTGGAAACAGCATA	GTGGAAAGGACGAAACACCGACGAACCCCCCTGGCCTCACGTTTAAGAGCTATGCTGGAAACAGCATA
RNF128_1287.6	CTGCGGCTTTTCCAGATTGC	GTGGAAAGGACGAAACACCG	GTTTAAGAGCTATGCTGGAAACAGCATA	GTGGAAAGGACGAAACACCGCTGCGGCTTTTCCAGATTGCGTTTAAGAGCTATGCTGGAAACAGCATA
RNF128_1287.22	GCACACGGGAGTGAACCGTA	GTGGAAAGGACGAAACACCG	GTTTAAGAGCTATGCTGGAAACAGCATA	GTGGAAAGGACGAAACACCGGCACACGGGAGTGAACCGTAGTTTAAGAGCTATGCTGGAAACAGCATA
RNF128_1287.41	TAACCCGCACACGAATTTCA	GTGGAAAGGACGAAACACCG	GTTTAAGAGCTATGCTGGAAACAGCATA	GTGGAAAGGACGAAACACCGTAACCCGCACACGAATTTCAGTTTAAGAGCTATGCTGGAAACAGCATA
RNF128_1287.141	ATGACCTCATTGCGGGTCCC	GTGGAAAGGACGAAACACCG	GTTTAAGAGCTATGCTGGAAACAGCATA	GTGGAAAGGACGAAACACCGATGACCTCATTGCGGGTCCCGTTTAAGAGCTATGCTGGAAACAGCATA
RNF128_1287.74	TATTATTACGGCGGCAACTG	GTGGAAAGGACGAAACACCG	GTTTAAGAGCTATGCTGGAAACAGCATA	GTGGAAAGGACGAAACACCGTATTATTACGGCGGCAACTGGTTTAAGAGCTATGCTGGAAACAGCATA
RNF128_1287.127	AAGATGCGTACCAAATCATT	GTGGAAAGGACGAAACACCG	GTTTAAGAGCTATGCTGGAAACAGCATA	GTGGAAAGGACGAAACACCGAAGATGCGTACCAAATCATTGTTTAAGAGCTATGCTGGAAACAGCATA
RNF128_1287.125	ATGGGTCAACACATGTCTTA	GTGGAAAGGACGAAACACCG	GTTTAAGAGCTATGCTGGAAACAGCATA	GTGGAAAGGACGAAACACCGATGGGTCAACACATGTCTTAGTTTAAGAGCTATGCTGGAAACAGCATA
RNF128_1287.88	ATAAGACATGTGTTGACCCA	GTGGAAAGGACGAAACACCG	GTTTAAGAGCTATGCTGGAAACAGCATA	GTGGAAAGGACGAAACACCGATAAGACATGTGTTGACCCAGTTTAAGAGCTATGCTGGAAACAGCATA
RNF128_1287.124	TCCTGTGTTCTAACAGCCAT	GTGGAAAGGACGAAACACCG	GTTTAAGAGCTATGCTGGAAACAGCATA	GTGGAAAGGACGAAACACCGTCCTGTGTTCTAACAGCCATGTTTAAGAGCTATGCTGGAAACAGCATA
RNF128_1287.123	GTCCTGTGTTCTAACAGCCA	GTGGAAAGGACGAAACACCG	GTTTAAGAGCTATGCTGGAAACAGCATA	GTGGAAAGGACGAAACACCGGTCCTGTGTTCTAACAGCCAGTTTAAGAGCTATGCTGGAAACAGCATA
RNF128_1287.89	ACCCATGGCTGTTAGAACAC	GTGGAAAGGACGAAACACCG	GTTTAAGAGCTATGCTGGAAACAGCATA	GTGGAAAGGACGAAACACCGACCCATGGCTGTTAGAACACGTTTAAGAGCTATGCTGGAAACAGCATA
RNF130_1260.151	CCGTGCCGGCCACAGGCTGC	GTGGAAAGGACGAAACACCG	GTTTAAGAGCTATGCTGGAAACAGCATA	GTGGAAAGGACGAAACACCGCCGTGCCGGCCACAGGCTGCGTTTAAGAGCTATGCTGGAAACAGCATA
RNF130_1260.13	TCACGTTTCGCATCGACCGC	GTGGAAAGGACGAAACACCG	GTTTAAGAGCTATGCTGGAAACAGCATA	GTGGAAAGGACGAAACACCGTCACGTTTCGCATCGACCGCGTTTAAGAGCTATGCTGGAAACAGCATA
RNF130_1260.136	CAGCACCTGGCCGCGGACCT	GTGGAAAGGACGAAACACCG	GTTTAAGAGCTATGCTGGAAACAGCATA	GTGGAAAGGACGAAACACCGCAGCACCTGGCCGCGGACCTGTTTAAGAGCTATGCTGGAAACAGCATA
RNF130_1260.24	TGGGCTGTGATCCACAAACC	GTGGAAAGGACGAAACACCG	GTTTAAGAGCTATGCTGGAAACAGCATA	GTGGAAAGGACGAAACACCGTGGGCTGTGATCCACAAACCGTTTAAGAGCTATGCTGGAAACAGCATA
RNF130_1260.128	GGGACAAAGAACCGGGTTTG	GTGGAAAGGACGAAACACCG	GTTTAAGAGCTATGCTGGAAACAGCATA	GTGGAAAGGACGAAACACCGGGGACAAAGAACCGGGTTTGGTTTAAGAGCTATGCTGGAAACAGCATA
RNF130_1260.49	TGTTTTCCACAAATCCTGCG	GTGGAAAGGACGAAACACCG	GTTTAAGAGCTATGCTGGAAACAGCATA	GTGGAAAGGACGAAACACCGTGTTTTCCACAAATCCTGCGGTTTAAGAGCTATGCTGGAAACAGCATA
RNF130_1260.101	AGGGATCCACGCAGGATTTG	GTGGAAAGGACGAAACACCG	GTTTAAGAGCTATGCTGGAAACAGCATA	GTGGAAAGGACGAAACACCGAGGGATCCACGCAGGATTTGGTTTAAGAGCTATGCTGGAAACAGCATA
RNF130_1260.50	ACAAATCCTGCGTGGATCCC	GTGGAAAGGACGAAACACCG	GTTTAAGAGCTATGCTGGAAACAGCATA	GTGGAAAGGACGAAACACCGACAAATCCTGCGTGGATCCCGTTTAAGAGCTATGCTGGAAACAGCATA
RNF130_1260.100	ACTAAGCCAGGGATCCACGC	GTGGAAAGGACGAAACACCG	GTTTAAGAGCTATGCTGGAAACAGCATA	GTGGAAAGGACGAAACACCGACTAAGCCAGGGATCCACGCGTTTAAGAGCTATGCTGGAAACAGCATA
RNF130_1260.99	GTACAATGTTCACTAAGCCA	GTGGAAAGGACGAAACACCG	GTTTAAGAGCTATGCTGGAAACAGCATA	GTGGAAAGGACGAAACACCGGTACAATGTTCACTAAGCCAGTTTAAGAGCTATGCTGGAAACAGCATA
RNF130_1260.98	GGTACAATGTTCACTAAGCC	GTGGAAAGGACGAAACACCG	GTTTAAGAGCTATGCTGGAAACAGCATA	GTGGAAAGGACGAAACACCGGGTACAATGTTCACTAAGCCGTTTAAGAGCTATGCTGGAAACAGCATA
RNF130_1260.97	ATTAAGTTTGCACATAGGAC	GTGGAAAGGACGAAACACCG	GTTTAAGAGCTATGCTGGAAACAGCATA	GTGGAAAGGACGAAACACCGATTAAGTTTGCACATAGGACGTTTAAGAGCTATGCTGGAAACAGCATA
RNF130_1260.51	GTGCAAACTTAATATATTGA	GTGGAAAGGACGAAACACCG	GTTTAAGAGCTATGCTGGAAACAGCATA	GTGGAAAGGACGAAACACCGGTGCAAACTTAATATATTGAGTTTAAGAGCTATGCTGGAAACAGCATA
RNF133_1131.13	AGGAGTTATAGTGCCACCAG	GTGGAAAGGACGAAACACCG	GTTTAAGAGCTATGCTGGAAACAGCATA	GTGGAAAGGACGAAACACCGAGGAGTTATAGTGCCACCAGGTTTAAGAGCTATGCTGGAAACAGCATA
RNF133_1131.100	CCGTTCAATAAGTGCAAGCC	GTGGAAAGGACGAAACACCG	GTTTAAGAGCTATGCTGGAAACAGCATA	GTGGAAAGGACGAAACACCGCCGTTCAATAAGTGCAAGCCGTTTAAGAGCTATGCTGGAAACAGCATA
RNF133_1131.97	AACACCTGGTTGCCAGTACC	GTGGAAAGGACGAAACACCG	GTTTAAGAGCTATGCTGGAAACAGCATA	GTGGAAAGGACGAAACACCGAACACCTGGTTGCCAGTACCGTTTAAGAGCTATGCTGGAAACAGCATA
RNF133_1131.85	AGGGGTCAATGCAATTCTTG	GTGGAAAGGACGAAACACCG	GTTTAAGAGCTATGCTGGAAACAGCATA	GTGGAAAGGACGAAACACCGAGGGGTCAATGCAATTCTTGGTTTAAGAGCTATGCTGGAAACAGCATA
RNF133_1131.52	ACAAGAATTGCATTGACCCC	GTGGAAAGGACGAAACACCG	GTTTAAGAGCTATGCTGGAAACAGCATA	GTGGAAAGGACGAAACACCGACAAGAATTGCATTGACCCCGTTTAAGAGCTATGCTGGAAACAGCATA
RNF133_1131.84	TCCCATGGGGTAAAATCCAG	GTGGAAAGGACGAAACACCG	GTTTAAGAGCTATGCTGGAAACAGCATA	GTGGAAAGGACGAAACACCGTCCCATGGGGTAAAATCCAGGTTTAAGAGCTATGCTGGAAACAGCATA
RNF133_1131.83	GTCCCATGGGGTAAAATCCA	GTGGAAAGGACGAAACACCG	GTTTAAGAGCTATGCTGGAAACAGCATA	GTGGAAAGGACGAAACACCGGTCCCATGGGGTAAAATCCAGTTTAAGAGCTATGCTGGAAACAGCATA
RNF133_1131.54	ACCCCTGGATTTTACCCCAT	GTGGAAAGGACGAAACACCG	GTTTAAGAGCTATGCTGGAAACAGCATA	GTGGAAAGGACGAAACACCGACCCCTGGATTTTACCCCATGTTTAAGAGCTATGCTGGAAACAGCATA
RNF133_1131.81	CAAATGGGGCATGTCCCATG	GTGGAAAGGACGAAACACCG	GTTTAAGAGCTATGCTGGAAACAGCATA	GTGGAAAGGACGAAACACCGCAAATGGGGCATGTCCCATGGTTTAAGAGCTATGCTGGAAACAGCATA
RNF133_1131.79	TGCAAATGGGGCATGTCCCA	GTGGAAAGGACGAAACACCG	GTTTAAGAGCTATGCTGGAAACAGCATA	GTGGAAAGGACGAAACACCGTGCAAATGGGGCATGTCCCAGTTTAAGAGCTATGCTGGAAACAGCATA
RNF133_1131.86	AGAATACGAACTATGTCATT	GTGGAAAGGACGAAACACCG	GTTTAAGAGCTATGCTGGAAACAGCATA	GTGGAAAGGACGAAACACCGAGAATACGAACTATGTCATTGTTTAAGAGCTATGCTGGAAACAGCATA
RNF135_1299.6	TCGGCTGCATCATCTGCCAG	GTGGAAAGGACGAAACACCG	GTTTAAGAGCTATGCTGGAAACAGCATA	GTGGAAAGGACGAAACACCGTCGGCTGCATCATCTGCCAGGTTTAAGAGCTATGCTGGAAACAGCATA
RNF135_1299.7	CATCATCTGCCAGGGGCTGC	GTGGAAAGGACGAAACACCG	GTTTAAGAGCTATGCTGGAAACAGCATA	GTGGAAAGGACGAAACACCGCATCATCTGCCAGGGGCTGCGTTTAAGAGCTATGCTGGAAACAGCATA
RNF135_1299.9	TGGCCCGCCACGCTGCCCTG	GTGGAAAGGACGAAACACCG	GTTTAAGAGCTATGCTGGAAACAGCATA	GTGGAAAGGACGAAACACCGTGGCCCGCCACGCTGCCCTGGTTTAAGAGCTATGCTGGAAACAGCATA
RNF135_1299.217	GGCGTCGCGGGCGCCCCACA	GTGGAAAGGACGAAACACCG	GTTTAAGAGCTATGCTGGAAACAGCATA	GTGGAAAGGACGAAACACCGGGCGTCGCGGGCGCCCCACAGTTTAAGAGCTATGCTGGAAACAGCATA
RNF135_1299.215	GGCCCAGCGGCGGGCGTCGC	GTGGAAAGGACGAAACACCG	GTTTAAGAGCTATGCTGGAAACAGCATA	GTGGAAAGGACGAAACACCGGGCCCAGCGGCGGGCGTCGCGTTTAAGAGCTATGCTGGAAACAGCATA
RNF135_1299.209	CGGCGCCCTGGCGGCAAGTG	GTGGAAAGGACGAAACACCG	GTTTAAGAGCTATGCTGGAAACAGCATA	GTGGAAAGGACGAAACACCGCGGCGCCCTGGCGGCAAGTGGTTTAAGAGCTATGCTGGAAACAGCATA
RNF135_1299.208	GCGGCGCCCTGGCGGCAAGT	GTGGAAAGGACGAAACACCG	GTTTAAGAGCTATGCTGGAAACAGCATA	GTGGAAAGGACGAAACACCGGCGGCGCCCTGGCGGCAAGTGTTTAAGAGCTATGCTGGAAACAGCATA
RNF135_1299.63	ACCGCCCACAACCCTATCGC	GTGGAAAGGACGAAACACCG	GTTTAAGAGCTATGCTGGAAACAGCATA	GTGGAAAGGACGAAACACCGACCGCCCACAACCCTATCGCGTTTAAGAGCTATGCTGGAAACAGCATA
RNF135_1299.81	GATGAGCCGCGACCAGGTCC	GTGGAAAGGACGAAACACCG	GTTTAAGAGCTATGCTGGAAACAGCATA	GTGGAAAGGACGAAACACCGGATGAGCCGCGACCAGGTCCGTTTAAGAGCTATGCTGGAAACAGCATA
RNF135_1299.11	CTTCTGCCGCCACTGCCTGG	GTGGAAAGGACGAAACACCG	GTTTAAGAGCTATGCTGGAAACAGCATA	GTGGAAAGGACGAAACACCGCTTCTGCCGCCACTGCCTGGGTTTAAGAGCTATGCTGGAAACAGCATA
RNF139_1995.141	GCACGATGCAGAACCGGCTT	GTGGAAAGGACGAAACACCG	GTTTAAGAGCTATGCTGGAAACAGCATA	GTGGAAAGGACGAAACACCGGCACGATGCAGAACCGGCTTGTTTAAGAGCTATGCTGGAAACAGCATA
RNF139_1995.131	GATAAGTGCCATCCACAGCG	GTGGAAAGGACGAAACACCG	GTTTAAGAGCTATGCTGGAAACAGCATA	GTGGAAAGGACGAAACACCGGATAAGTGCCATCCACAGCGGTTTAAGAGCTATGCTGGAAACAGCATA
RNF139_1995.29	AGGCACATGTATCGAATTTA	GTGGAAAGGACGAAACACCG	GTTTAAGAGCTATGCTGGAAACAGCATA	GTGGAAAGGACGAAACACCGAGGCACATGTATCGAATTTAGTTTAAGAGCTATGCTGGAAACAGCATA
RNF139_1995.59	CTCTTCAGACTGGGTTAAGT	GTGGAAAGGACGAAACACCG	GTTTAAGAGCTATGCTGGAAACAGCATA	GTGGAAAGGACGAAACACCGCTCTTCAGACTGGGTTAAGTGTTTAAGAGCTATGCTGGAAACAGCATA
RNF139_1995.98	ATTTCCGAAGGCAAAGTGCA	GTGGAAAGGACGAAACACCG	GTTTAAGAGCTATGCTGGAAACAGCATA	GTGGAAAGGACGAAACACCGATTTCCGAAGGCAAAGTGCAGTTTAAGAGCTATGCTGGAAACAGCATA
RNF139_1995.82	ATTTCCATGCACTTTGCCTT	GTGGAAAGGACGAAACACCG	GTTTAAGAGCTATGCTGGAAACAGCATA	GTGGAAAGGACGAAACACCGATTTCCATGCACTTTGCCTTGTTTAAGAGCTATGCTGGAAACAGCATA
RNF139_1995.83	ATGCACTTTGCCTTCGGAAA	GTGGAAAGGACGAAACACCG	GTTTAAGAGCTATGCTGGAAACAGCATA	GTGGAAAGGACGAAACACCGATGCACTTTGCCTTCGGAAAGTTTAAGAGCTATGCTGGAAACAGCATA
RNF139_1995.97	GAATGTACAGCCATTTCCGA	GTGGAAAGGACGAAACACCG	GTTTAAGAGCTATGCTGGAAACAGCATA	GTGGAAAGGACGAAACACCGGAATGTACAGCCATTTCCGAGTTTAAGAGCTATGCTGGAAACAGCATA
RNF139_1995.96	TATACTTTCTGATGGCACAT	GTGGAAAGGACGAAACACCG	GTTTAAGAGCTATGCTGGAAACAGCATA	GTGGAAAGGACGAAACACCGTATACTTTCTGATGGCACATGTTTAAGAGCTATGCTGGAAACAGCATA
RNF139_1995.95	CTTCGATGTATACTTTCTGA	GTGGAAAGGACGAAACACCG	GTTTAAGAGCTATGCTGGAAACAGCATA	GTGGAAAGGACGAAACACCGCTTCGATGTATACTTTCTGAGTTTAAGAGCTATGCTGGAAACAGCATA
RNF139_1995.99	GCATGGAAATAATGATTACA	GTGGAAAGGACGAAACACCG	GTTTAAGAGCTATGCTGGAAACAGCATA	GTGGAAAGGACGAAACACCGGCATGGAAATAATGATTACAGTTTAAGAGCTATGCTGGAAACAGCATA
RNF141_693.32	GAGTGTTGTATCTGTATGGA	GTGGAAAGGACGAAACACCG	GTTTAAGAGCTATGCTGGAAACAGCATA	GTGGAAAGGACGAAACACCGGAGTGTTGTATCTGTATGGAGTTTAAGAGCTATGCTGGAAACAGCATA
RNF141_693.33	AGTGTTGTATCTGTATGGAT	GTGGAAAGGACGAAACACCG	GTTTAAGAGCTATGCTGGAAACAGCATA	GTGGAAAGGACGAAACACCGAGTGTTGTATCTGTATGGATGTTTAAGAGCTATGCTGGAAACAGCATA
RNF141_693.34	GTTGTATCTGTATGGATGGG	GTGGAAAGGACGAAACACCG	GTTTAAGAGCTATGCTGGAAACAGCATA	GTGGAAAGGACGAAACACCGGTTGTATCTGTATGGATGGGGTTTAAGAGCTATGCTGGAAACAGCATA
RNF141_693.35	TTGTATCTGTATGGATGGGC	GTGGAAAGGACGAAACACCG	GTTTAAGAGCTATGCTGGAAACAGCATA	GTGGAAAGGACGAAACACCGTTGTATCTGTATGGATGGGCGTTTAAGAGCTATGCTGGAAACAGCATA
RNF141_693.50	GTCATCTGTAGGCGACAAAT	GTGGAAAGGACGAAACACCG	GTTTAAGAGCTATGCTGGAAACAGCATA	GTGGAAAGGACGAAACACCGGTCATCTGTAGGCGACAAATGTTTAAGAGCTATGCTGGAAACAGCATA
RNF145_2082.10	TGTTGGATGTCCTGTACAGA	GTGGAAAGGACGAAACACCG	GTTTAAGAGCTATGCTGGAAACAGCATA	GTGGAAAGGACGAAACACCGTGTTGGATGTCCTGTACAGAGTTTAAGAGCTATGCTGGAAACAGCATA
RNF145_2082.210	GGCTACTTCTTTGGATCTGC	GTGGAAAGGACGAAACACCG	GTTTAAGAGCTATGCTGGAAACAGCATA	GTGGAAAGGACGAAACACCGGGCTACTTCTTTGGATCTGCGTTTAAGAGCTATGCTGGAAACAGCATA
RNF145_2082.21	GGACTATGTTCGGAGTGAAC	GTGGAAAGGACGAAACACCG	GTTTAAGAGCTATGCTGGAAACAGCATA	GTGGAAAGGACGAAACACCGGGACTATGTTCGGAGTGAACGTTTAAGAGCTATGCTGGAAACAGCATA
RNF145_2082.189	GGGACATTCCCAAGGCGAGA	GTGGAAAGGACGAAACACCG	GTTTAAGAGCTATGCTGGAAACAGCATA	GTGGAAAGGACGAAACACCGGGGACATTCCCAAGGCGAGAGTTTAAGAGCTATGCTGGAAACAGCATA
RNF145_2082.150	GCATGGAAAAAATGACTGCA	GTGGAAAGGACGAAACACCG	GTTTAAGAGCTATGCTGGAAACAGCATA	GTGGAAAGGACGAAACACCGGCATGGAAAAAATGACTGCAGTTTAAGAGCTATGCTGGAAACAGCATA
RNF145_2082.101	TGCAGTCATTTTTTCCATGC	GTGGAAAGGACGAAACACCG	GTTTAAGAGCTATGCTGGAAACAGCATA	GTGGAAAGGACGAAACACCGTGCAGTCATTTTTTCCATGCGTTTAAGAGCTATGCTGGAAACAGCATA
RNF145_2082.147	ATGGCAGTGGCACAGAGGGC	GTGGAAAGGACGAAACACCG	GTTTAAGAGCTATGCTGGAAACAGCATA	GTGGAAAGGACGAAACACCGATGGCAGTGGCACAGAGGGCGTTTAAGAGCTATGCTGGAAACAGCATA
RNF145_2082.146	TCAGATGGCAGTGGCACAGA	GTGGAAAGGACGAAACACCG	GTTTAAGAGCTATGCTGGAAACAGCATA	GTGGAAAGGACGAAACACCGTCAGATGGCAGTGGCACAGAGTTTAAGAGCTATGCTGGAAACAGCATA
RNF145_2082.145	TTCAGATGGCAGTGGCACAG	GTGGAAAGGACGAAACACCG	GTTTAAGAGCTATGCTGGAAACAGCATA	GTGGAAAGGACGAAACACCGTTCAGATGGCAGTGGCACAGGTTTAAGAGCTATGCTGGAAACAGCATA
RNF146_1077.91	TGCAGACAAATGGCACATTC	GTGGAAAGGACGAAACACCG	GTTTAAGAGCTATGCTGGAAACAGCATA	GTGGAAAGGACGAAACACCGTGCAGACAAATGGCACATTCGTTTAAGAGCTATGCTGGAAACAGCATA
RNF146_1077.89	TGCTTACAGGGCAGACTGAC	GTGGAAAGGACGAAACACCG	GTTTAAGAGCTATGCTGGAAACAGCATA	GTGGAAAGGACGAAACACCGTGCTTACAGGGCAGACTGACGTTTAAGAGCTATGCTGGAAACAGCATA
RNF146_1077.88	TAGCAGAAAACGTGCTTACA	GTGGAAAGGACGAAACACCG	GTTTAAGAGCTATGCTGGAAACAGCATA	GTGGAAAGGACGAAACACCGTAGCAGAAAACGTGCTTACAGTTTAAGAGCTATGCTGGAAACAGCATA
RNF146_1077.87	ATAGCAGAAAACGTGCTTAC	GTGGAAAGGACGAAACACCG	GTTTAAGAGCTATGCTGGAAACAGCATA	GTGGAAAGGACGAAACACCGATAGCAGAAAACGTGCTTACGTTTAAGAGCTATGCTGGAAACAGCATA
RNF146_1077.1	TTCTGCTATCTATGTGTAAA	GTGGAAAGGACGAAACACCG	GTTTAAGAGCTATGCTGGAAACAGCATA	GTGGAAAGGACGAAACACCGTTCTGCTATCTATGTGTAAAGTTTAAGAGCTATGCTGGAAACAGCATA
RNF146_1077.4	GAGCTTCATGGCTTGGAAAG	GTGGAAAGGACGAAACACCG	GTTTAAGAGCTATGCTGGAAACAGCATA	GTGGAAAGGACGAAACACCGGAGCTTCATGGCTTGGAAAGGTTTAAGAGCTATGCTGGAAACAGCATA
RNF146_1077.5	TTGTCGACAAGAAATTCCCG	GTGGAAAGGACGAAACACCG	GTTTAAGAGCTATGCTGGAAACAGCATA	GTGGAAAGGACGAAACACCGTTGTCGACAAGAAATTCCCGGTTTAAGAGCTATGCTGGAAACAGCATA
RNF146_1077.15	TGAGCGCACTAGTAGAGAGC	GTGGAAAGGACGAAACACCG	GTTTAAGAGCTATGCTGGAAACAGCATA	GTGGAAAGGACGAAACACCGTGAGCGCACTAGTAGAGAGCGTTTAAGAGCTATGCTGGAAACAGCATA
RNF146_1077.21	GAAATGAACATGGACGTCGC	GTGGAAAGGACGAAACACCG	GTTTAAGAGCTATGCTGGAAACAGCATA	GTGGAAAGGACGAAACACCGGAAATGAACATGGACGTCGCGTTTAAGAGCTATGCTGGAAACAGCATA
RNF148_918.67	TAAAATGCGTACTACATCTT	GTGGAAAGGACGAAACACCG	GTTTAAGAGCTATGCTGGAAACAGCATA	GTGGAAAGGACGAAACACCGTAAAATGCGTACTACATCTTGTTTAAGAGCTATGCTGGAAACAGCATA
RNF148_918.97	AAACAGAACTATGCGTCGAA	GTGGAAAGGACGAAACACCG	GTTTAAGAGCTATGCTGGAAACAGCATA	GTGGAAAGGACGAAACACCGAAACAGAACTATGCGTCGAAGTTTAAGAGCTATGCTGGAAACAGCATA
RNF148_918.14	TCTCCTCTGGAAAGGGTGTC	GTGGAAAGGACGAAACACCG	GTTTAAGAGCTATGCTGGAAACAGCATA	GTGGAAAGGACGAAACACCGTCTCCTCTGGAAAGGGTGTCGTTTAAGAGCTATGCTGGAAACAGCATA
RNF148_918.85	ACAGCCTCCACGTTCGATGA	GTGGAAAGGACGAAACACCG	GTTTAAGAGCTATGCTGGAAACAGCATA	GTGGAAAGGACGAAACACCGACAGCCTCCACGTTCGATGAGTTTAAGAGCTATGCTGGAAACAGCATA
RNF148_918.38	GGGGACGGAAAATATAGTCG	GTGGAAAGGACGAAACACCG	GTTTAAGAGCTATGCTGGAAACAGCATA	GTGGAAAGGACGAAACACCGGGGGACGGAAAATATAGTCGGTTTAAGAGCTATGCTGGAAACAGCATA
RNF148_918.65	AGGGGTCAATGCATGCCTTA	GTGGAAAGGACGAAACACCG	GTTTAAGAGCTATGCTGGAAACAGCATA	GTGGAAAGGACGAAACACCGAGGGGTCAATGCATGCCTTAGTTTAAGAGCTATGCTGGAAACAGCATA
RNF148_918.56	ATAAGGCATGCATTGACCCC	GTGGAAAGGACGAAACACCG	GTTTAAGAGCTATGCTGGAAACAGCATA	GTGGAAAGGACGAAACACCGATAAGGCATGCATTGACCCCGTTTAAGAGCTATGCTGGAAACAGCATA
RNF148_918.64	TCCTATGGGCTAAAAGCCAG	GTGGAAAGGACGAAACACCG	GTTTAAGAGCTATGCTGGAAACAGCATA	GTGGAAAGGACGAAACACCGTCCTATGGGCTAAAAGCCAGGTTTAAGAGCTATGCTGGAAACAGCATA
RNF148_918.62	TGTCCTATGGGCTAAAAGCC	GTGGAAAGGACGAAACACCG	GTTTAAGAGCTATGCTGGAAACAGCATA	GTGGAAAGGACGAAACACCGTGTCCTATGGGCTAAAAGCCGTTTAAGAGCTATGCTGGAAACAGCATA
RNF148_918.61	GCACATGGGACATGTCCTAT	GTGGAAAGGACGAAACACCG	GTTTAAGAGCTATGCTGGAAACAGCATA	GTGGAAAGGACGAAACACCGGCACATGGGACATGTCCTATGTTTAAGAGCTATGCTGGAAACAGCATA
RNF148_918.59	AGGATGTCACACTTGCACAT	GTGGAAAGGACGAAACACCG	GTTTAAGAGCTATGCTGGAAACAGCATA	GTGGAAAGGACGAAACACCGAGGATGTCACACTTGCACATGTTTAAGAGCTATGCTGGAAACAGCATA
RNF149_1203.5	GGCTCGCGGCGTGTTGGCTC	GTGGAAAGGACGAAACACCG	GTTTAAGAGCTATGCTGGAAACAGCATA	GTGGAAAGGACGAAACACCGGGCTCGCGGCGTGTTGGCTCGTTTAAGAGCTATGCTGGAAACAGCATA
RNF149_1203.24	CTTCGGCGACAGCTCGCCCA	GTGGAAAGGACGAAACACCG	GTTTAAGAGCTATGCTGGAAACAGCATA	GTGGAAAGGACGAAACACCGCTTCGGCGACAGCTCGCCCAGTTTAAGAGCTATGCTGGAAACAGCATA
RNF149_1203.162	GGCACGAAGAAGCGCGTGTC	GTGGAAAGGACGAAACACCG	GTTTAAGAGCTATGCTGGAAACAGCATA	GTGGAAAGGACGAAACACCGGGCACGAAGAAGCGCGTGTCGTTTAAGAGCTATGCTGGAAACAGCATA
RNF149_1203.147	CGTAGCGCTCCTCATTGTAG	GTGGAAAGGACGAAACACCG	GTTTAAGAGCTATGCTGGAAACAGCATA	GTGGAAAGGACGAAACACCGCGTAGCGCTCCTCATTGTAGGTTTAAGAGCTATGCTGGAAACAGCATA
RNF149_1203.136	GGCTAACGAGATAATCATCA	GTGGAAAGGACGAAACACCG	GTTTAAGAGCTATGCTGGAAACAGCATA	GTGGAAAGGACGAAACACCGGGCTAACGAGATAATCATCAGTTTAAGAGCTATGCTGGAAACAGCATA
RNF149_1203.86	ATAGAATATGCATTGACCCA	GTGGAAAGGACGAAACACCG	GTTTAAGAGCTATGCTGGAAACAGCATA	GTGGAAAGGACGAAACACCGATAGAATATGCATTGACCCAGTTTAAGAGCTATGCTGGAAACAGCATA
RNF149_1203.130	TTCGGTGATCCAAAAGCCAT	GTGGAAAGGACGAAACACCG	GTTTAAGAGCTATGCTGGAAACAGCATA	GTGGAAAGGACGAAACACCGTTCGGTGATCCAAAAGCCATGTTTAAGAGCTATGCTGGAAACAGCATA
RNF149_1203.129	GTTCGGTGATCCAAAAGCCA	GTGGAAAGGACGAAACACCG	GTTTAAGAGCTATGCTGGAAACAGCATA	GTGGAAAGGACGAAACACCGGTTCGGTGATCCAAAAGCCAGTTTAAGAGCTATGCTGGAAACAGCATA
RNF149_1203.128	GTTTACACATTGGACATGTT	GTGGAAAGGACGAAACACCG	GTTTAAGAGCTATGCTGGAAACAGCATA	GTGGAAAGGACGAAACACCGGTTTACACATTGGACATGTTGTTTAAGAGCTATGCTGGAAACAGCATA
RNF149_1203.127	ATGACATCAAGTTTACACAT	GTGGAAAGGACGAAACACCG	GTTTAAGAGCTATGCTGGAAACAGCATA	GTGGAAAGGACGAAACACCGATGACATCAAGTTTACACATGTTTAAGAGCTATGCTGGAAACAGCATA
RNF150_1317.3	GCTCTGCCTGGACTTTACCG	GTGGAAAGGACGAAACACCG	GTTTAAGAGCTATGCTGGAAACAGCATA	GTGGAAAGGACGAAACACCGGCTCTGCCTGGACTTTACCGGTTTAAGAGCTATGCTGGAAACAGCATA
RNF150_1317.25	AAGACGGAGTGCGGGCGCTA	GTGGAAAGGACGAAACACCG	GTTTAAGAGCTATGCTGGAAACAGCATA	GTGGAAAGGACGAAACACCGAAGACGGAGTGCGGGCGCTAGTTTAAGAGCTATGCTGGAAACAGCATA
RNF150_1317.188	GCGGGTCGGGGCGGCGAACT	GTGGAAAGGACGAAACACCG	GTTTAAGAGCTATGCTGGAAACAGCATA	GTGGAAAGGACGAAACACCGGCGGGTCGGGGCGGCGAACTGTTTAAGAGCTATGCTGGAAACAGCATA
RNF150_1317.153	ATAAAAGACGAGCCATGCGA	GTGGAAAGGACGAAACACCG	GTTTAAGAGCTATGCTGGAAACAGCATA	GTGGAAAGGACGAAACACCGATAAAAGACGAGCCATGCGAGTTTAAGAGCTATGCTGGAAACAGCATA
RNF150_1317.68	AACTGTGCAGTTTGTATTGA	GTGGAAAGGACGAAACACCG	GTTTAAGAGCTATGCTGGAAACAGCATA	GTGGAAAGGACGAAACACCGAACTGTGCAGTTTGTATTGAGTTTAAGAGCTATGCTGGAAACAGCATA
RNF150_1317.144	AGGATCCGGACAACGTCATT	GTGGAAAGGACGAAACACCG	GTTTAAGAGCTATGCTGGAAACAGCATA	GTGGAAAGGACGAAACACCGAGGATCCGGACAACGTCATTGTTTAAGAGCTATGCTGGAAACAGCATA
RNF150_1317.143	CAGGATCCGGACAACGTCAT	GTGGAAAGGACGAAACACCG	GTTTAAGAGCTATGCTGGAAACAGCATA	GTGGAAAGGACGAAACACCGCAGGATCCGGACAACGTCATGTTTAAGAGCTATGCTGGAAACAGCATA
RNF150_1317.137	AGGGGTCAACACAGGACTTG	GTGGAAAGGACGAAACACCG	GTTTAAGAGCTATGCTGGAAACAGCATA	GTGGAAAGGACGAAACACCGAGGGGTCAACACAGGACTTGGTTTAAGAGCTATGCTGGAAACAGCATA
RNF150_1317.136	TAGAAGCCAGGGGTCAACAC	GTGGAAAGGACGAAACACCG	GTTTAAGAGCTATGCTGGAAACAGCATA	GTGGAAAGGACGAAACACCGTAGAAGCCAGGGGTCAACACGTTTAAGAGCTATGCTGGAAACAGCATA
RNF150_1317.133	GGTACGATGGTCTAGAAGCC	GTGGAAAGGACGAAACACCG	GTTTAAGAGCTATGCTGGAAACAGCATA	GTGGAAAGGACGAAACACCGGGTACGATGGTCTAGAAGCCGTTTAAGAGCTATGCTGGAAACAGCATA
RNF150_1317.132	TGCACATGGGACAGGTACGA	GTGGAAAGGACGAAACACCG	GTTTAAGAGCTATGCTGGAAACAGCATA	GTGGAAAGGACGAAACACCGTGCACATGGGACAGGTACGAGTTTAAGAGCTATGCTGGAAACAGCATA
RNF150_1317.130	AGAATGTTCATCTTGCACAT	GTGGAAAGGACGAAACACCG	GTTTAAGAGCTATGCTGGAAACAGCATA	GTGGAAAGGACGAAACACCGAGAATGTTCATCTTGCACATGTTTAAGAGCTATGCTGGAAACAGCATA
RNF151_738.1	TCGTGTGCTCCGTCTGCCAT	GTGGAAAGGACGAAACACCG	GTTTAAGAGCTATGCTGGAAACAGCATA	GTGGAAAGGACGAAACACCGTCGTGTGCTCCGTCTGCCATGTTTAAGAGCTATGCTGGAAACAGCATA
RNF151_738.139	CTGGCCTCTTGAGAACCCCA	GTGGAAAGGACGAAACACCG	GTTTAAGAGCTATGCTGGAAACAGCATA	GTGGAAAGGACGAAACACCGCTGGCCTCTTGAGAACCCCAGTTTAAGAGCTATGCTGGAAACAGCATA
RNF151_738.3	TCTGCCATGGGGTTCTCAAG	GTGGAAAGGACGAAACACCG	GTTTAAGAGCTATGCTGGAAACAGCATA	GTGGAAAGGACGAAACACCGTCTGCCATGGGGTTCTCAAGGTTTAAGAGCTATGCTGGAAACAGCATA
RNF151_738.138	TGGCTGCATGGCAACCTTGC	GTGGAAAGGACGAAACACCG	GTTTAAGAGCTATGCTGGAAACAGCATA	GTGGAAAGGACGAAACACCGTGGCTGCATGGCAACCTTGCGTTTAAGAGCTATGCTGGAAACAGCATA
RNF151_738.5	TCTGCAAAAAGTGCATCCTC	GTGGAAAGGACGAAACACCG	GTTTAAGAGCTATGCTGGAAACAGCATA	GTGGAAAGGACGAAACACCGTCTGCAAAAAGTGCATCCTCGTTTAAGAGCTATGCTGGAAACAGCATA
RNF151_738.6	GCAAAAAGTGCATCCTCCGG	GTGGAAAGGACGAAACACCG	GTTTAAGAGCTATGCTGGAAACAGCATA	GTGGAAAGGACGAAACACCGGCAAAAAGTGCATCCTCCGGGTTTAAGAGCTATGCTGGAAACAGCATA
RNF151_738.7	AAAAGACCTGTCCGTGCTGT	GTGGAAAGGACGAAACACCG	GTTTAAGAGCTATGCTGGAAACAGCATA	GTGGAAAGGACGAAACACCGAAAAGACCTGTCCGTGCTGTGTTTAAGAGCTATGCTGGAAACAGCATA
RNF151_738.8	CTGTCCGTGCTGTAGGAAAG	GTGGAAAGGACGAAACACCG	GTTTAAGAGCTATGCTGGAAACAGCATA	GTGGAAAGGACGAAACACCGCTGTCCGTGCTGTAGGAAAGGTTTAAGAGCTATGCTGGAAACAGCATA
RNF152_612.1	GTTTCAATTACTACAGCCCC	GTGGAAAGGACGAAACACCG	GTTTAAGAGCTATGCTGGAAACAGCATA	GTGGAAAGGACGAAACACCGGTTTCAATTACTACAGCCCCGTTTAAGAGCTATGCTGGAAACAGCATA
RNF152_612.2	ATTACTACAGCCCCCGGCGC	GTGGAAAGGACGAAACACCG	GTTTAAGAGCTATGCTGGAAACAGCATA	GTGGAAAGGACGAAACACCGATTACTACAGCCCCCGGCGCGTTTAAGAGCTATGCTGGAAACAGCATA
RNF152_612.106	AGCAACTTGGGCCTGCGCCG	GTGGAAAGGACGAAACACCG	GTTTAAGAGCTATGCTGGAAACAGCATA	GTGGAAAGGACGAAACACCGAGCAACTTGGGCCTGCGCCGGTTTAAGAGCTATGCTGGAAACAGCATA
RNF152_612.3	CCGGCGCAGGCCCAAGTTGC	GTGGAAAGGACGAAACACCG	GTTTAAGAGCTATGCTGGAAACAGCATA	GTGGAAAGGACGAAACACCGCCGGCGCAGGCCCAAGTTGCGTTTAAGAGCTATGCTGGAAACAGCATA
RNF152_612.100	GGCTGGTCCTCATCTGCTGC	GTGGAAAGGACGAAACACCG	GTTTAAGAGCTATGCTGGAAACAGCATA	GTGGAAAGGACGAAACACCGGGCTGGTCCTCATCTGCTGCGTTTAAGAGCTATGCTGGAAACAGCATA
RNF152_612.8	GTGCGGTGCCCCTGGTGCCG	GTGGAAAGGACGAAACACCG	GTTTAAGAGCTATGCTGGAAACAGCATA	GTGGAAAGGACGAAACACCGGTGCGGTGCCCCTGGTGCCGGTTTAAGAGCTATGCTGGAAACAGCATA
RNF152_612.52	GACAGTGCACACCCCCGACC	GTGGAAAGGACGAAACACCG	GTTTAAGAGCTATGCTGGAAACAGCATA	GTGGAAAGGACGAAACACCGGACAGTGCACACCCCCGACCGTTTAAGAGCTATGCTGGAAACAGCATA
RNF152_612.51	TGTGAAGCACGATGCCGAGG	GTGGAAAGGACGAAACACCG	GTTTAAGAGCTATGCTGGAAACAGCATA	GTGGAAAGGACGAAACACCGTGTGAAGCACGATGCCGAGGGTTTAAGAGCTATGCTGGAAACAGCATA
RNF157_2040.49	CGAGTGTGTGGTGTGTCTCT	GTGGAAAGGACGAAACACCG	GTTTAAGAGCTATGCTGGAAACAGCATA	GTGGAAAGGACGAAACACCGCGAGTGTGTGGTGTGTCTCTGTTTAAGAGCTATGCTGGAAACAGCATA
RNF157_2040.50	TGGTGTGTCTCTCGGATGTC	GTGGAAAGGACGAAACACCG	GTTTAAGAGCTATGCTGGAAACAGCATA	GTGGAAAGGACGAAACACCGTGGTGTGTCTCTCGGATGTCGTTTAAGAGCTATGCTGGAAACAGCATA
RNF157_2040.51	GGTGTGTCTCTCGGATGTCC	GTGGAAAGGACGAAACACCG	GTTTAAGAGCTATGCTGGAAACAGCATA	GTGGAAAGGACGAAACACCGGGTGTGTCTCTCGGATGTCCGTTTAAGAGCTATGCTGGAAACAGCATA
RNF157_2040.245	AGGGCAGAATCAAGGTGTCC	GTGGAAAGGACGAAACACCG	GTTTAAGAGCTATGCTGGAAACAGCATA	GTGGAAAGGACGAAACACCGAGGGCAGAATCAAGGTGTCCGTTTAAGAGCTATGCTGGAAACAGCATA
RNF157_2040.242	ACAGAGGCAGAGGTGGCGAC	GTGGAAAGGACGAAACACCG	GTTTAAGAGCTATGCTGGAAACAGCATA	GTGGAAAGGACGAAACACCGACAGAGGCAGAGGTGGCGACGTTTAAGAGCTATGCTGGAAACAGCATA
RNF157_2040.238	GTAGCGCAGCGTGTCTGCAC	GTGGAAAGGACGAAACACCG	GTTTAAGAGCTATGCTGGAAACAGCATA	GTGGAAAGGACGAAACACCGGTAGCGCAGCGTGTCTGCACGTTTAAGAGCTATGCTGGAAACAGCATA
RNF157_2040.52	TGCAGACACGCTGCGCTACC	GTGGAAAGGACGAAACACCG	GTTTAAGAGCTATGCTGGAAACAGCATA	GTGGAAAGGACGAAACACCGTGCAGACACGCTGCGCTACCGTTTAAGAGCTATGCTGGAAACAGCATA
RNF165_1041.54	CACAATTTGTCTGTCTATGC	GTGGAAAGGACGAAACACCG	GTTTAAGAGCTATGCTGGAAACAGCATA	GTGGAAAGGACGAAACACCGCACAATTTGTCTGTCTATGCGTTTAAGAGCTATGCTGGAAACAGCATA
RNF165_1041.70	GAAAGAGATGCATACAGGGT	GTGGAAAGGACGAAACACCG	GTTTAAGAGCTATGCTGGAAACAGCATA	GTGGAAAGGACGAAACACCGGAAAGAGATGCATACAGGGTGTTTAAGAGCTATGCTGGAAACAGCATA
RNF165_1041.56	TCTCTTTCACCAACTGTGCG	GTGGAAAGGACGAAACACCG	GTTTAAGAGCTATGCTGGAAACAGCATA	GTGGAAAGGACGAAACACCGTCTCTTTCACCAACTGTGCGGTTTAAGAGCTATGCTGGAAACAGCATA
RNF165_1041.67	GCCACTGGTCCACGCACAGT	GTGGAAAGGACGAAACACCG	GTTTAAGAGCTATGCTGGAAACAGCATA	GTGGAAAGGACGAAACACCGGCCACTGGTCCACGCACAGTGTTTAAGAGCTATGCTGGAAACAGCATA
RNF165_1041.57	ACCAACTGTGCGTGGACCAG	GTGGAAAGGACGAAACACCG	GTTTAAGAGCTATGCTGGAAACAGCATA	GTGGAAAGGACGAAACACCGACCAACTGTGCGTGGACCAGGTTTAAGAGCTATGCTGGAAACAGCATA
RNF165_1041.66	TCTTGCTCATGGCGAGCCAC	GTGGAAAGGACGAAACACCG	GTTTAAGAGCTATGCTGGAAACAGCATA	GTGGAAAGGACGAAACACCGTCTTGCTCATGGCGAGCCACGTTTAAGAGCTATGCTGGAAACAGCATA
RNF165_1041.58	GAAATGCCCCATCTGCCGAG	GTGGAAAGGACGAAACACCG	GTTTAAGAGCTATGCTGGAAACAGCATA	GTGGAAAGGACGAAACACCGGAAATGCCCCATCTGCCGAGGTTTAAGAGCTATGCTGGAAACAGCATA
RNF165_1041.63	TCAATGTCCACTCGGCAGAT	GTGGAAAGGACGAAACACCG	GTTTAAGAGCTATGCTGGAAACAGCATA	GTGGAAAGGACGAAACACCGTCAATGTCCACTCGGCAGATGTTTAAGAGCTATGCTGGAAACAGCATA
RNF165_1041.62	CTCAATGTCCACTCGGCAGA	GTGGAAAGGACGAAACACCG	GTTTAAGAGCTATGCTGGAAACAGCATA	GTGGAAAGGACGAAACACCGCTCAATGTCCACTCGGCAGAGTTTAAGAGCTATGCTGGAAACAGCATA
RNF166_714.137	GATAGACCTCCAGGCAGATG	GTGGAAAGGACGAAACACCG	GTTTAAGAGCTATGCTGGAAACAGCATA	GTGGAAAGGACGAAACACCGGATAGACCTCCAGGCAGATGGTTTAAGAGCTATGCTGGAAACAGCATA
RNF166_714.134	CGGGCCGGTGATAGACCTCC	GTGGAAAGGACGAAACACCG	GTTTAAGAGCTATGCTGGAAACAGCATA	GTGGAAAGGACGAAACACCGCGGGCCGGTGATAGACCTCCGTTTAAGAGCTATGCTGGAAACAGCATA
RNF166_714.16	GGAGGTCTATCACCGGCCCG	GTGGAAAGGACGAAACACCG	GTTTAAGAGCTATGCTGGAAACAGCATA	GTGGAAAGGACGAAACACCGGGAGGTCTATCACCGGCCCGGTTTAAGAGCTATGCTGGAAACAGCATA
RNF166_714.133	AGCTGCCGATGGCCACGGGC	GTGGAAAGGACGAAACACCG	GTTTAAGAGCTATGCTGGAAACAGCATA	GTGGAAAGGACGAAACACCGAGCTGCCGATGGCCACGGGCGTTTAAGAGCTATGCTGGAAACAGCATA
RNF166_714.132	CCGCAGCTGCCGATGGCCAC	GTGGAAAGGACGAAACACCG	GTTTAAGAGCTATGCTGGAAACAGCATA	GTGGAAAGGACGAAACACCGCCGCAGCTGCCGATGGCCACGTTTAAGAGCTATGCTGGAAACAGCATA
RNF166_714.18	CCCGTGGCCATCGGCAGCTG	GTGGAAAGGACGAAACACCG	GTTTAAGAGCTATGCTGGAAACAGCATA	GTGGAAAGGACGAAACACCGCCCGTGGCCATCGGCAGCTGGTTTAAGAGCTATGCTGGAAACAGCATA
RNF166_714.125	ACAGCGGGGATGGCACCTGC	GTGGAAAGGACGAAACACCG	GTTTAAGAGCTATGCTGGAAACAGCATA	GTGGAAAGGACGAAACACCGACAGCGGGGATGGCACCTGCGTTTAAGAGCTATGCTGGAAACAGCATA
RNF166_714.117	CCTTCTTGGGGTCGAAGGGC	GTGGAAAGGACGAAACACCG	GTTTAAGAGCTATGCTGGAAACAGCATA	GTGGAAAGGACGAAACACCGCCTTCTTGGGGTCGAAGGGCGTTTAAGAGCTATGCTGGAAACAGCATA
RNF166_714.36	GTACTGTGGTGCCCGCAACC	GTGGAAAGGACGAAACACCG	GTTTAAGAGCTATGCTGGAAACAGCATA	GTGGAAAGGACGAAACACCGGTACTGTGGTGCCCGCAACCGTTTAAGAGCTATGCTGGAAACAGCATA
RNF166_714.42	CCATCTGCTCGGCAATGCCC	GTGGAAAGGACGAAACACCG	GTTTAAGAGCTATGCTGGAAACAGCATA	GTGGAAAGGACGAAACACCGCCATCTGCTCGGCAATGCCCGTTTAAGAGCTATGCTGGAAACAGCATA
RNF167_1053.1	CTTCCCGCTTCCTGTGGTTG	GTGGAAAGGACGAAACACCG	GTTTAAGAGCTATGCTGGAAACAGCATA	GTGGAAAGGACGAAACACCGCTTCCCGCTTCCTGTGGTTGGTTTAAGAGCTATGCTGGAAACAGCATA
RNF167_1053.196	AAGGTAGCCCCAAACAGAGC	GTGGAAAGGACGAAACACCG	GTTTAAGAGCTATGCTGGAAACAGCATA	GTGGAAAGGACGAAACACCGAAGGTAGCCCCAAACAGAGCGTTTAAGAGCTATGCTGGAAACAGCATA
RNF167_1053.176	AAAGACTGACCCATTGACCG	GTGGAAAGGACGAAACACCG	GTTTAAGAGCTATGCTGGAAACAGCATA	GTGGAAAGGACGAAACACCGAAAGACTGACCCATTGACCGGTTTAAGAGCTATGCTGGAAACAGCATA
RNF167_1053.153	AGTCCCACAATCCCTGTGAA	GTGGAAAGGACGAAACACCG	GTTTAAGAGCTATGCTGGAAACAGCATA	GTGGAAAGGACGAAACACCGAGTCCCACAATCCCTGTGAAGTTTAAGAGCTATGCTGGAAACAGCATA
RNF167_1053.145	CTCATATTCATCCAGGCAAA	GTGGAAAGGACGAAACACCG	GTTTAAGAGCTATGCTGGAAACAGCATA	GTGGAAAGGACGAAACACCGCTCATATTCATCCAGGCAAAGTTTAAGAGCTATGCTGGAAACAGCATA
RNF167_1053.62	GCCTGGATGAATATGAGGAT	GTGGAAAGGACGAAACACCG	GTTTAAGAGCTATGCTGGAAACAGCATA	GTGGAAAGGACGAAACACCGGCCTGGATGAATATGAGGATGTTTAAGAGCTATGCTGGAAACAGCATA
RNF167_1053.140	GTCCACGCAGCGGCTGTGGT	GTGGAAAGGACGAAACACCG	GTTTAAGAGCTATGCTGGAAACAGCATA	GTGGAAAGGACGAAACACCGGTCCACGCAGCGGCTGTGGTGTTTAAGAGCTATGCTGGAAACAGCATA
RNF167_1053.67	ACAGCCGCTGCGTGGACCCC	GTGGAAAGGACGAAACACCG	GTTTAAGAGCTATGCTGGAAACAGCATA	GTGGAAAGGACGAAACACCGACAGCCGCTGCGTGGACCCCGTTTAAGAGCTATGCTGGAAACAGCATA
RNF167_1053.135	CTTCCGGGTCTGAGTGAGCC	GTGGAAAGGACGAAACACCG	GTTTAAGAGCTATGCTGGAAACAGCATA	GTGGAAAGGACGAAACACCGCTTCCGGGTCTGAGTGAGCCGTTTAAGAGCTATGCTGGAAACAGCATA
RNF167_1053.133	TGCAAATGGGGCAGGTCTTC	GTGGAAAGGACGAAACACCG	GTTTAAGAGCTATGCTGGAAACAGCATA	GTGGAAAGGACGAAACACCGTGCAAATGGGGCAGGTCTTCGTTTAAGAGCTATGCTGGAAACAGCATA
RNF167_1053.71	TGCAAGCAGCCTGTTCATCG	GTGGAAAGGACGAAACACCG	GTTTAAGAGCTATGCTGGAAACAGCATA	GTGGAAAGGACGAAACACCGTGCAAGCAGCCTGTTCATCGGTTTAAGAGCTATGCTGGAAACAGCATA
RNF168_1716.177	TTTCCATGCAGATCCCGCAC	GTGGAAAGGACGAAACACCG	GTTTAAGAGCTATGCTGGAAACAGCATA	GTGGAAAGGACGAAACACCGTTTCCATGCAGATCCCGCACGTTTAAGAGCTATGCTGGAAACAGCATA
RNF168_1716.3	GATCTGCATGGAAATCCTCG	GTGGAAAGGACGAAACACCG	GTTTAAGAGCTATGCTGGAAACAGCATA	GTGGAAAGGACGAAACACCGGATCTGCATGGAAATCCTCGGTTTAAGAGCTATGCTGGAAACAGCATA
RNF168_1716.176	GGAGGGTGACGGGCTCCACG	GTGGAAAGGACGAAACACCG	GTTTAAGAGCTATGCTGGAAACAGCATA	GTGGAAAGGACGAAACACCGGGAGGGTGACGGGCTCCACGGTTTAAGAGCTATGCTGGAAACAGCATA
RNF168_1716.173	CAGCGTGTGGTTACACGGGA	GTGGAAAGGACGAAACACCG	GTTTAAGAGCTATGCTGGAAACAGCATA	GTGGAAAGGACGAAACACCGCAGCGTGTGGTTACACGGGAGTTTAAGAGCTATGCTGGAAACAGCATA
RNF168_1716.170	TTACACAGCGTGTGGTTACA	GTGGAAAGGACGAAACACCG	GTTTAAGAGCTATGCTGGAAACAGCATA	GTGGAAAGGACGAAACACCGTTACACAGCGTGTGGTTACAGTTTAAGAGCTATGCTGGAAACAGCATA
RNF168_1716.169	AGCACGGTTTACACAGCGTG	GTGGAAAGGACGAAACACCG	GTTTAAGAGCTATGCTGGAAACAGCATA	GTGGAAAGGACGAAACACCGAGCACGGTTTACACAGCGTGGTTTAAGAGCTATGCTGGAAACAGCATA
RNF168_1716.168	TCGACGGTCGACTGGAAGCA	GTGGAAAGGACGAAACACCG	GTTTAAGAGCTATGCTGGAAACAGCATA	GTGGAAAGGACGAAACACCGTCGACGGTCGACTGGAAGCAGTTTAAGAGCTATGCTGGAAACAGCATA
RNF168_1716.4	CTTCCAGTCGACCGTCGAAA	GTGGAAAGGACGAAACACCG	GTTTAAGAGCTATGCTGGAAACAGCATA	GTGGAAAGGACGAAACACCGCTTCCAGTCGACCGTCGAAAGTTTAAGAGCTATGCTGGAAACAGCATA
RNF168_1716.164	CGATACCCGGCGGCGACAGA	GTGGAAAGGACGAAACACCG	GTTTAAGAGCTATGCTGGAAACAGCATA	GTGGAAAGGACGAAACACCGCGATACCCGGCGGCGACAGAGTTTAAGAGCTATGCTGGAAACAGCATA
RNF168_1716.18	TCGTCTGCTCAGTAAACCTG	GTGGAAAGGACGAAACACCG	GTTTAAGAGCTATGCTGGAAACAGCATA	GTGGAAAGGACGAAACACCGTCGTCTGCTCAGTAAACCTGGTTTAAGAGCTATGCTGGAAACAGCATA
RNF17_4872.374	TCCTTCCACACCTGGTGCAC	GTGGAAAGGACGAAACACCG	GTTTAAGAGCTATGCTGGAAACAGCATA	GTGGAAAGGACGAAACACCGTCCTTCCACACCTGGTGCACGTTTAAGAGCTATGCTGGAAACAGCATA
RNF17_4872.12	TCCAGTGCACCAGGTGTGGA	GTGGAAAGGACGAAACACCG	GTTTAAGAGCTATGCTGGAAACAGCATA	GTGGAAAGGACGAAACACCGTCCAGTGCACCAGGTGTGGAGTTTAAGAGCTATGCTGGAAACAGCATA
RNF17_4872.373	GGATACCCTCCTTCCACACC	GTGGAAAGGACGAAACACCG	GTTTAAGAGCTATGCTGGAAACAGCATA	GTGGAAAGGACGAAACACCGGGATACCCTCCTTCCACACCGTTTAAGAGCTATGCTGGAAACAGCATA
RNF17_4872.14	GTGCACCAGGTGTGGAAGGA	GTGGAAAGGACGAAACACCG	GTTTAAGAGCTATGCTGGAAACAGCATA	GTGGAAAGGACGAAACACCGGTGCACCAGGTGTGGAAGGAGTTTAAGAGCTATGCTGGAAACAGCATA
RNF17_4872.370	GTCCACATTGAAGTTCACAA	GTGGAAAGGACGAAACACCG	GTTTAAGAGCTATGCTGGAAACAGCATA	GTGGAAAGGACGAAACACCGGTCCACATTGAAGTTCACAAGTTTAAGAGCTATGCTGGAAACAGCATA
RNF17_4872.16	CACCATTGTGAACTTCAATG	GTGGAAAGGACGAAACACCG	GTTTAAGAGCTATGCTGGAAACAGCATA	GTGGAAAGGACGAAACACCGCACCATTGTGAACTTCAATGGTTTAAGAGCTATGCTGGAAACAGCATA
RNF17_4872.319	GGTTGGACTACAAGGTTTTC	GTGGAAAGGACGAAACACCG	GTTTAAGAGCTATGCTGGAAACAGCATA	GTGGAAAGGACGAAACACCGGGTTGGACTACAAGGTTTTCGTTTAAGAGCTATGCTGGAAACAGCATA
RNF17_4872.257	GCCTCAAATACGTTCATGTT	GTGGAAAGGACGAAACACCG	GTTTAAGAGCTATGCTGGAAACAGCATA	GTGGAAAGGACGAAACACCGGCCTCAAATACGTTCATGTTGTTTAAGAGCTATGCTGGAAACAGCATA
RNF17_4872.145	TACTCTGTGGTATCGTGGCA	GTGGAAAGGACGAAACACCG	GTTTAAGAGCTATGCTGGAAACAGCATA	GTGGAAAGGACGAAACACCGTACTCTGTGGTATCGTGGCAGTTTAAGAGCTATGCTGGAAACAGCATA
RNF17_4872.172	AGATGATAGTGGAGTCAGCG	GTGGAAAGGACGAAACACCG	GTTTAAGAGCTATGCTGGAAACAGCATA	GTGGAAAGGACGAAACACCGAGATGATAGTGGAGTCAGCGGTTTAAGAGCTATGCTGGAAACAGCATA
RNF17_4872.215	GGATACCGCATAAGATGAGA	GTGGAAAGGACGAAACACCG	GTTTAAGAGCTATGCTGGAAACAGCATA	GTGGAAAGGACGAAACACCGGGATACCGCATAAGATGAGAGTTTAAGAGCTATGCTGGAAACAGCATA
RNF17_4860.367	ACAATCAGGGCATATAATTG	GTGGAAAGGACGAAACACCG	GTTTAAGAGCTATGCTGGAAACAGCATA	GTGGAAAGGACGAAACACCGACAATCAGGGCATATAATTGGTTTAAGAGCTATGCTGGAAACAGCATA
RNF170_777.3	CCAAGTACTTGTGGCAGTTG	GTGGAAAGGACGAAACACCG	GTTTAAGAGCTATGCTGGAAACAGCATA	GTGGAAAGGACGAAACACCGCCAAGTACTTGTGGCAGTTGGTTTAAGAGCTATGCTGGAAACAGCATA
RNF170_777.4	TTTCGCTTTGATTGCTACCC	GTGGAAAGGACGAAACACCG	GTTTAAGAGCTATGCTGGAAACAGCATA	GTGGAAAGGACGAAACACCGTTTCGCTTTGATTGCTACCCGTTTAAGAGCTATGCTGGAAACAGCATA
RNF170_777.61	CCGGGAAGGAGGCTTGGTGC	GTGGAAAGGACGAAACACCG	GTTTAAGAGCTATGCTGGAAACAGCATA	GTGGAAAGGACGAAACACCGCCGGGAAGGAGGCTTGGTGCGTTTAAGAGCTATGCTGGAAACAGCATA
RNF170_777.10	GCACCAAGCCTCCTTCCCGG	GTGGAAAGGACGAAACACCG	GTTTAAGAGCTATGCTGGAAACAGCATA	GTGGAAAGGACGAAACACCGGCACCAAGCCTCCTTCCCGGGTTTAAGAGCTATGCTGGAAACAGCATA
RNF170_777.59	GTTGGTCTCCACCGGGAAGG	GTGGAAAGGACGAAACACCG	GTTTAAGAGCTATGCTGGAAACAGCATA	GTGGAAAGGACGAAACACCGGTTGGTCTCCACCGGGAAGGGTTTAAGAGCTATGCTGGAAACAGCATA
RNF170_777.58	ACAGTTGGTCTCCACCGGGA	GTGGAAAGGACGAAACACCG	GTTTAAGAGCTATGCTGGAAACAGCATA	GTGGAAAGGACGAAACACCGACAGTTGGTCTCCACCGGGAGTTTAAGAGCTATGCTGGAAACAGCATA
RNF170_777.11	TTCCCGGTGGAGACCAACTG	GTGGAAAGGACGAAACACCG	GTTTAAGAGCTATGCTGGAAACAGCATA	GTGGAAAGGACGAAACACCGTTCCCGGTGGAGACCAACTGGTTTAAGAGCTATGCTGGAAACAGCATA
RNF170_777.54	TCGCCAGTAAGCAATAATGC	GTGGAAAGGACGAAACACCG	GTTTAAGAGCTATGCTGGAAACAGCATA	GTGGAAAGGACGAAACACCGTCGCCAGTAAGCAATAATGCGTTTAAGAGCTATGCTGGAAACAGCATA
RNF170_777.15	CTTACTGGCGATATGGTTCA	GTGGAAAGGACGAAACACCG	GTTTAAGAGCTATGCTGGAAACAGCATA	GTGGAAAGGACGAAACACCGCTTACTGGCGATATGGTTCAGTTTAAGAGCTATGCTGGAAACAGCATA
RNF170_777.17	GGCGATATGGTTCATGGCTT	GTGGAAAGGACGAAACACCG	GTTTAAGAGCTATGCTGGAAACAGCATA	GTGGAAAGGACGAAACACCGGGCGATATGGTTCATGGCTTGTTTAAGAGCTATGCTGGAAACAGCATA
RNF175_987.14	GGTCATTGCCCAGATAGTGC	GTGGAAAGGACGAAACACCG	GTTTAAGAGCTATGCTGGAAACAGCATA	GTGGAAAGGACGAAACACCGGGTCATTGCCCAGATAGTGCGTTTAAGAGCTATGCTGGAAACAGCATA
RNF175_987.25	GTGGCGGTTTCTGTCTATGT	GTGGAAAGGACGAAACACCG	GTTTAAGAGCTATGCTGGAAACAGCATA	GTGGAAAGGACGAAACACCGGTGGCGGTTTCTGTCTATGTGTTTAAGAGCTATGCTGGAAACAGCATA
RNF175_987.51	ACAATATCTGTGCAGTCTGT	GTGGAAAGGACGAAACACCG	GTTTAAGAGCTATGCTGGAAACAGCATA	GTGGAAAGGACGAAACACCGACAATATCTGTGCAGTCTGTGTTTAAGAGCTATGCTGGAAACAGCATA
RNF175_987.54	TTGTGGAGCTTGATGAAGAA	GTGGAAAGGACGAAACACCG	GTTTAAGAGCTATGCTGGAAACAGCATA	GTGGAAAGGACGAAACACCGTTGTGGAGCTTGATGAAGAAGTTTAAGAGCTATGCTGGAAACAGCATA
RNF175_987.84	ATGATTACAGGAAAGCTGGT	GTGGAAAGGACGAAACACCG	GTTTAAGAGCTATGCTGGAAACAGCATA	GTGGAAAGGACGAAACACCGATGATTACAGGAAAGCTGGTGTTTAAGAGCTATGCTGGAAACAGCATA
RNF175_987.56	ATGAATTCTGCATCCGAGGT	GTGGAAAGGACGAAACACCG	GTTTAAGAGCTATGCTGGAAACAGCATA	GTGGAAAGGACGAAACACCGATGAATTCTGCATCCGAGGTGTTTAAGAGCTATGCTGGAAACAGCATA
RNF175_987.81	TCCCAACGATACACCAACCT	GTGGAAAGGACGAAACACCG	GTTTAAGAGCTATGCTGGAAACAGCATA	GTGGAAAGGACGAAACACCGTCCCAACGATACACCAACCTGTTTAAGAGCTATGCTGGAAACAGCATA
RNF175_987.57	ATCCGAGGTTGGTGTATCGT	GTGGAAAGGACGAAACACCG	GTTTAAGAGCTATGCTGGAAACAGCATA	GTGGAAAGGACGAAACACCGATCCGAGGTTGGTGTATCGTGTTTAAGAGCTATGCTGGAAACAGCATA
RNF175_987.58	TCCGAGGTTGGTGTATCGTT	GTGGAAAGGACGAAACACCG	GTTTAAGAGCTATGCTGGAAACAGCATA	GTGGAAAGGACGAAACACCGTCCGAGGTTGGTGTATCGTTGTTTAAGAGCTATGCTGGAAACAGCATA
RNF180_1779.123	TTGTGTCTGGGTCTCATGGG	GTGGAAAGGACGAAACACCG	GTTTAAGAGCTATGCTGGAAACAGCATA	GTGGAAAGGACGAAACACCGTTGTGTCTGGGTCTCATGGGGTTTAAGAGCTATGCTGGAAACAGCATA
RNF180_1779.42	CATGCCGGAGGCCTCAGACC	GTGGAAAGGACGAAACACCG	GTTTAAGAGCTATGCTGGAAACAGCATA	GTGGAAAGGACGAAACACCGCATGCCGGAGGCCTCAGACCGTTTAAGAGCTATGCTGGAAACAGCATA
RNF180_1779.58	CTACATCTGTGCAGTGTGTC	GTGGAAAGGACGAAACACCG	GTTTAAGAGCTATGCTGGAAACAGCATA	GTGGAAAGGACGAAACACCGCTACATCTGTGCAGTGTGTCGTTTAAGAGCTATGCTGGAAACAGCATA
RNF180_1779.102	GGCAAGGGTAACACATATAA	GTGGAAAGGACGAAACACCG	GTTTAAGAGCTATGCTGGAAACAGCATA	GTGGAAAGGACGAAACACCGGGCAAGGGTAACACATATAAGTTTAAGAGCTATGCTGGAAACAGCATA
RNF180_1779.97	TTGGCCAGAGTCCGTAAGCA	GTGGAAAGGACGAAACACCG	GTTTAAGAGCTATGCTGGAAACAGCATA	GTGGAAAGGACGAAACACCGTTGGCCAGAGTCCGTAAGCAGTTTAAGAGCTATGCTGGAAACAGCATA
RNF180_1779.95	AGTGCTTGAAGGATTGTCTT	GTGGAAAGGACGAAACACCG	GTTTAAGAGCTATGCTGGAAACAGCATA	GTGGAAAGGACGAAACACCGAGTGCTTGAAGGATTGTCTTGTTTAAGAGCTATGCTGGAAACAGCATA
RNF180_1779.94	AATGGGCATGGAGTGCTTGA	GTGGAAAGGACGAAACACCG	GTTTAAGAGCTATGCTGGAAACAGCATA	GTGGAAAGGACGAAACACCGAATGGGCATGGAGTGCTTGAGTTTAAGAGCTATGCTGGAAACAGCATA
RNF180_1779.61	GCACTCCATGCCCATTGTGT	GTGGAAAGGACGAAACACCG	GTTTAAGAGCTATGCTGGAAACAGCATA	GTGGAAAGGACGAAACACCGGCACTCCATGCCCATTGTGTGTTTAAGAGCTATGCTGGAAACAGCATA
RNF182_744.3	ATCGATACAATCTGAAACAG	GTGGAAAGGACGAAACACCG	GTTTAAGAGCTATGCTGGAAACAGCATA	GTGGAAAGGACGAAACACCGATCGATACAATCTGAAACAGGTTTAAGAGCTATGCTGGAAACAGCATA
RNF182_744.5	AAGTGCTGGAGTGTTGTCAT	GTGGAAAGGACGAAACACCG	GTTTAAGAGCTATGCTGGAAACAGCATA	GTGGAAAGGACGAAACACCGAAGTGCTGGAGTGTTGTCATGTTTAAGAGCTATGCTGGAAACAGCATA
RNF182_744.86	CAAAGTCTATGATCTTGTAG	GTGGAAAGGACGAAACACCG	GTTTAAGAGCTATGCTGGAAACAGCATA	GTGGAAAGGACGAAACACCGCAAAGTCTATGATCTTGTAGGTTTAAGAGCTATGCTGGAAACAGCATA
RNF182_744.8	TCTACAAGATCATAGACTTT	GTGGAAAGGACGAAACACCG	GTTTAAGAGCTATGCTGGAAACAGCATA	GTGGAAAGGACGAAACACCGTCTACAAGATCATAGACTTTGTTTAAGAGCTATGCTGGAAACAGCATA
RNF182_744.85	ACAGACAATGACACCTTGTG	GTGGAAAGGACGAAACACCG	GTTTAAGAGCTATGCTGGAAACAGCATA	GTGGAAAGGACGAAACACCGACAGACAATGACACCTTGTGGTTTAAGAGCTATGCTGGAAACAGCATA
RNF182_744.84	GACAGACAATGACACCTTGT	GTGGAAAGGACGAAACACCG	GTTTAAGAGCTATGCTGGAAACAGCATA	GTGGAAAGGACGAAACACCGGACAGACAATGACACCTTGTGTTTAAGAGCTATGCTGGAAACAGCATA
RNF182_744.83	GGACAGACAATGACACCTTG	GTGGAAAGGACGAAACACCG	GTTTAAGAGCTATGCTGGAAACAGCATA	GTGGAAAGGACGAAACACCGGGACAGACAATGACACCTTGGTTTAAGAGCTATGCTGGAAACAGCATA
RNF182_744.30	TACTTCAGCTCCTTACCCTT	GTGGAAAGGACGAAACACCG	GTTTAAGAGCTATGCTGGAAACAGCATA	GTGGAAAGGACGAAACACCGTACTTCAGCTCCTTACCCTTGTTTAAGAGCTATGCTGGAAACAGCATA
RNF182_744.43	TAACGAGGCTCGAAGGGACC	GTGGAAAGGACGAAACACCG	GTTTAAGAGCTATGCTGGAAACAGCATA	GTGGAAAGGACGAAACACCGTAACGAGGCTCGAAGGGACCGTTTAAGAGCTATGCTGGAAACAGCATA
RNF183_579.1	AGGCTGAGTGCCCCGTCTGC	GTGGAAAGGACGAAACACCG	GTTTAAGAGCTATGCTGGAAACAGCATA	GTGGAAAGGACGAAACACCGAGGCTGAGTGCCCCGTCTGCGTTTAAGAGCTATGCTGGAAACAGCATA
RNF183_579.114	TTGAAGGGGTTCCAGCAGAC	GTGGAAAGGACGAAACACCG	GTTTAAGAGCTATGCTGGAAACAGCATA	GTGGAAAGGACGAAACACCGTTGAAGGGGTTCCAGCAGACGTTTAAGAGCTATGCTGGAAACAGCATA
RNF183_579.112	TATGGAACGTGTTGTTGAAG	GTGGAAAGGACGAAACACCG	GTTTAAGAGCTATGCTGGAAACAGCATA	GTGGAAAGGACGAAACACCGTATGGAACGTGTTGTTGAAGGTTTAAGAGCTATGCTGGAAACAGCATA
RNF183_579.110	GGTATGGAACGTGTTGTTGA	GTGGAAAGGACGAAACACCG	GTTTAAGAGCTATGCTGGAAACAGCATA	GTGGAAAGGACGAAACACCGGGTATGGAACGTGTTGTTGAGTTTAAGAGCTATGCTGGAAACAGCATA
RNF183_579.105	GTGGCAGCAATCCAGCATTT	GTGGAAAGGACGAAACACCG	GTTTAAGAGCTATGCTGGAAACAGCATA	GTGGAAAGGACGAAACACCGGTGGCAGCAATCCAGCATTTGTTTAAGAGCTATGCTGGAAACAGCATA
RNF183_579.3	TTGCTGCCACTCCTTCTGCG	GTGGAAAGGACGAAACACCG	GTTTAAGAGCTATGCTGGAAACAGCATA	GTGGAAAGGACGAAACACCGTTGCTGCCACTCCTTCTGCGGTTTAAGAGCTATGCTGGAAACAGCATA
RNF183_579.4	CTCCTTCTGCGTGGAATGTC	GTGGAAAGGACGAAACACCG	GTTTAAGAGCTATGCTGGAAACAGCATA	GTGGAAAGGACGAAACACCGCTCCTTCTGCGTGGAATGTCGTTTAAGAGCTATGCTGGAAACAGCATA
RNF183_579.97	TGGGCACAGCAGGCGGCGCC	GTGGAAAGGACGAAACACCG	GTTTAAGAGCTATGCTGGAAACAGCATA	GTGGAAAGGACGAAACACCGTGGGCACAGCAGGCGGCGCCGTTTAAGAGCTATGCTGGAAACAGCATA
RNF183_579.38	GAGGATGACGGCCATCAGGT	GTGGAAAGGACGAAACACCG	GTTTAAGAGCTATGCTGGAAACAGCATA	GTGGAAAGGACGAAACACCGGAGGATGACGGCCATCAGGTGTTTAAGAGCTATGCTGGAAACAGCATA
RNF185_579.13	TTTCGAGTGCAACATCTGCT	GTGGAAAGGACGAAACACCG	GTTTAAGAGCTATGCTGGAAACAGCATA	GTGGAAAGGACGAAACACCGTTTCGAGTGCAACATCTGCTGTTTAAGAGCTATGCTGGAAACAGCATA
RNF185_579.14	CATCTGCTTGGACACAGCCA	GTGGAAAGGACGAAACACCG	GTTTAAGAGCTATGCTGGAAACAGCATA	GTGGAAAGGACGAAACACCGCATCTGCTTGGACACAGCCAGTTTAAGAGCTATGCTGGAAACAGCATA
RNF185_579.96	CAGGCTGATGACGGCATCCT	GTGGAAAGGACGAAACACCG	GTTTAAGAGCTATGCTGGAAACAGCATA	GTGGAAAGGACGAAACACCGCAGGCTGATGACGGCATCCTGTTTAAGAGCTATGCTGGAAACAGCATA
RNF185_579.15	GATGCCGTCATCAGCCTGTG	GTGGAAAGGACGAAACACCG	GTTTAAGAGCTATGCTGGAAACAGCATA	GTGGAAAGGACGAAACACCGGATGCCGTCATCAGCCTGTGGTTTAAGAGCTATGCTGGAAACAGCATA
RNF185_579.90	ACACACCTGTCTGTTAGGTC	GTGGAAAGGACGAAACACCG	GTTTAAGAGCTATGCTGGAAACAGCATA	GTGGAAAGGACGAAACACCGACACACCTGTCTGTTAGGTCGTTTAAGAGCTATGCTGGAAACAGCATA
RNF185_579.89	ACAGGACACACCTGTCTGTT	GTGGAAAGGACGAAACACCG	GTTTAAGAGCTATGCTGGAAACAGCATA	GTGGAAAGGACGAAACACCGACAGGACACACCTGTCTGTTGTTTAAGAGCTATGCTGGAAACAGCATA
RNF186_684.123	CCCGGCACACCAGACACTCC	GTGGAAAGGACGAAACACCG	GTTTAAGAGCTATGCTGGAAACAGCATA	GTGGAAAGGACGAAACACCGCCCGGCACACCAGACACTCCGTTTAAGAGCTATGCTGGAAACAGCATA
RNF186_684.121	GGCAACCGGGGACAGCTGTA	GTGGAAAGGACGAAACACCG	GTTTAAGAGCTATGCTGGAAACAGCATA	GTGGAAAGGACGAAACACCGGGCAACCGGGGACAGCTGTAGTTTAAGAGCTATGCTGGAAACAGCATA
RNF186_684.12	TCCCCGGTTGCCCAAGCTGC	GTGGAAAGGACGAAACACCG	GTTTAAGAGCTATGCTGGAAACAGCATA	GTGGAAAGGACGAAACACCGTCCCCGGTTGCCCAAGCTGCGTTTAAGAGCTATGCTGGAAACAGCATA
RNF186_684.113	AGATGGCGCAGAAGGCATGC	GTGGAAAGGACGAAACACCG	GTTTAAGAGCTATGCTGGAAACAGCATA	GTGGAAAGGACGAAACACCGAGATGGCGCAGAAGGCATGCGTTTAAGAGCTATGCTGGAAACAGCATA
RNF186_684.112	CTTCAGGCAGATGGCGCAGA	GTGGAAAGGACGAAACACCG	GTTTAAGAGCTATGCTGGAAACAGCATA	GTGGAAAGGACGAAACACCGCTTCAGGCAGATGGCGCAGAGTTTAAGAGCTATGCTGGAAACAGCATA
RNF186_684.13	GAAGCTCCTGCTGTGCGTGC	GTGGAAAGGACGAAACACCG	GTTTAAGAGCTATGCTGGAAACAGCATA	GTGGAAAGGACGAAACACCGGAAGCTCCTGCTGTGCGTGCGTTTAAGAGCTATGCTGGAAACAGCATA
RNF186_684.109	TGTTGTCCTGCACGCACAGC	GTGGAAAGGACGAAACACCG	GTTTAAGAGCTATGCTGGAAACAGCATA	GTGGAAAGGACGAAACACCGTGTTGTCCTGCACGCACAGCGTTTAAGAGCTATGCTGGAAACAGCATA
RNF186_684.106	GACCTTGCGGCACAGCGGGC	GTGGAAAGGACGAAACACCG	GTTTAAGAGCTATGCTGGAAACAGCATA	GTGGAAAGGACGAAACACCGGACCTTGCGGCACAGCGGGCGTTTAAGAGCTATGCTGGAAACAGCATA
RNF186_684.104	GCGGTGACCTTGCGGCACAG	GTGGAAAGGACGAAACACCG	GTTTAAGAGCTATGCTGGAAACAGCATA	GTGGAAAGGACGAAACACCGGCGGTGACCTTGCGGCACAGGTTTAAGAGCTATGCTGGAAACAGCATA
RNF186_684.48	ATCGGGCCCTTCATCTACCC	GTGGAAAGGACGAAACACCG	GTTTAAGAGCTATGCTGGAAACAGCATA	GTGGAAAGGACGAAACACCGATCGGGCCCTTCATCTACCCGTTTAAGAGCTATGCTGGAAACAGCATA
RNF186_684.51	GCTCACCTTCATCATCGCCC	GTGGAAAGGACGAAACACCG	GTTTAAGAGCTATGCTGGAAACAGCATA	GTGGAAAGGACGAAACACCGGCTCACCTTCATCATCGCCCGTTTAAGAGCTATGCTGGAAACAGCATA
RNF187_708.136	TCGGCGCGCACCGGTTCCCG	GTGGAAAGGACGAAACACCG	GTTTAAGAGCTATGCTGGAAACAGCATA	GTGGAAAGGACGAAACACCGTCGGCGCGCACCGGTTCCCGGTTTAAGAGCTATGCTGGAAACAGCATA
RNF187_708.4	GAACCGGTGCGCGCCGACTG	GTGGAAAGGACGAAACACCG	GTTTAAGAGCTATGCTGGAAACAGCATA	GTGGAAAGGACGAAACACCGGAACCGGTGCGCGCCGACTGGTTTAAGAGCTATGCTGGAAACAGCATA
RNF187_708.131	CGCACGCCCGACAGAAGCGG	GTGGAAAGGACGAAACACCG	GTTTAAGAGCTATGCTGGAAACAGCATA	GTGGAAAGGACGAAACACCGCGCACGCCCGACAGAAGCGGGTTTAAGAGCTATGCTGGAAACAGCATA
RNF187_708.130	CCACGCACGCCCGACAGAAG	GTGGAAAGGACGAAACACCG	GTTTAAGAGCTATGCTGGAAACAGCATA	GTGGAAAGGACGAAACACCGCCACGCACGCCCGACAGAAGGTTTAAGAGCTATGCTGGAAACAGCATA
RNF187_708.8	GGGCGTGCGTGGTGCGCTTC	GTGGAAAGGACGAAACACCG	GTTTAAGAGCTATGCTGGAAACAGCATA	GTGGAAAGGACGAAACACCGGGGCGTGCGTGGTGCGCTTCGTTTAAGAGCTATGCTGGAAACAGCATA
RNF187_708.11	GGTGCGCTTCTGGGCCGAGG	GTGGAAAGGACGAAACACCG	GTTTAAGAGCTATGCTGGAAACAGCATA	GTGGAAAGGACGAAACACCGGGTGCGCTTCTGGGCCGAGGGTTTAAGAGCTATGCTGGAAACAGCATA
RNF187_708.126	CGTCGGCGCACTCGGGGCAC	GTGGAAAGGACGAAACACCG	GTTTAAGAGCTATGCTGGAAACAGCATA	GTGGAAAGGACGAAACACCGCGTCGGCGCACTCGGGGCACGTTTAAGAGCTATGCTGGAAACAGCATA
RNF19A_2517.214	AATGCCGCAAAAGGCACAAA	GTGGAAAGGACGAAACACCG	GTTTAAGAGCTATGCTGGAAACAGCATA	GTGGAAAGGACGAAACACCGAATGCCGCAAAAGGCACAAAGTTTAAGAGCTATGCTGGAAACAGCATA
RNF19A_2517.213	GAATGCCGCAAAAGGCACAA	GTGGAAAGGACGAAACACCG	GTTTAAGAGCTATGCTGGAAACAGCATA	GTGGAAAGGACGAAACACCGGAATGCCGCAAAAGGCACAAGTTTAAGAGCTATGCTGGAAACAGCATA
RNF19A_2517.212	TGTCTTTAGAATGCCGCAAA	GTGGAAAGGACGAAACACCG	GTTTAAGAGCTATGCTGGAAACAGCATA	GTGGAAAGGACGAAACACCGTGTCTTTAGAATGCCGCAAAGTTTAAGAGCTATGCTGGAAACAGCATA
RNF19A_2517.20	TTGTCATCACAGATCTTGTG	GTGGAAAGGACGAAACACCG	GTTTAAGAGCTATGCTGGAAACAGCATA	GTGGAAAGGACGAAACACCGTTGTCATCACAGATCTTGTGGTTTAAGAGCTATGCTGGAAACAGCATA
RNF19A_2517.210	TAAACCGTTCAGTACATTCT	GTGGAAAGGACGAAACACCG	GTTTAAGAGCTATGCTGGAAACAGCATA	GTGGAAAGGACGAAACACCGTAAACCGTTCAGTACATTCTGTTTAAGAGCTATGCTGGAAACAGCATA
RNF19A_2517.25	AAGAATTTATGCTTAGACGG	GTGGAAAGGACGAAACACCG	GTTTAAGAGCTATGCTGGAAACAGCATA	GTGGAAAGGACGAAACACCGAAGAATTTATGCTTAGACGGGTTTAAGAGCTATGCTGGAAACAGCATA
RNF19A_2517.30	AGCTGTCCAAAATTAACTTG	GTGGAAAGGACGAAACACCG	GTTTAAGAGCTATGCTGGAAACAGCATA	GTGGAAAGGACGAAACACCGAGCTGTCCAAAATTAACTTGGTTTAAGAGCTATGCTGGAAACAGCATA
RNF19A_2517.33	AAATTAACTTGTGGGCGAGA	GTGGAAAGGACGAAACACCG	GTTTAAGAGCTATGCTGGAAACAGCATA	GTGGAAAGGACGAAACACCGAAATTAACTTGTGGGCGAGAGTTTAAGAGCTATGCTGGAAACAGCATA
RNF19A_2517.35	GCTACCACTGTAAACAGATT	GTGGAAAGGACGAAACACCG	GTTTAAGAGCTATGCTGGAAACAGCATA	GTGGAAAGGACGAAACACCGGCTACCACTGTAAACAGATTGTTTAAGAGCTATGCTGGAAACAGCATA
RNF19A_2517.191	TAAGCAGCACATCGTGGACA	GTGGAAAGGACGAAACACCG	GTTTAAGAGCTATGCTGGAAACAGCATA	GTGGAAAGGACGAAACACCGTAAGCAGCACATCGTGGACAGTTTAAGAGCTATGCTGGAAACAGCATA
RNF19A_2517.39	CACATGACATGTGCTGTTTG	GTGGAAAGGACGAAACACCG	GTTTAAGAGCTATGCTGGAAACAGCATA	GTGGAAAGGACGAAACACCGCACATGACATGTGCTGTTTGGTTTAAGAGCTATGCTGGAAACAGCATA
RNF19A_2517.53	GTCGGAATCGCTTTAATAGC	GTGGAAAGGACGAAACACCG	GTTTAAGAGCTATGCTGGAAACAGCATA	GTGGAAAGGACGAAACACCGGTCGGAATCGCTTTAATAGCGTTTAAGAGCTATGCTGGAAACAGCATA
RNF19A_2517.146	AAAGCGGGTGTGATAATCAC	GTGGAAAGGACGAAACACCG	GTTTAAGAGCTATGCTGGAAACAGCATA	GTGGAAAGGACGAAACACCGAAAGCGGGTGTGATAATCACGTTTAAGAGCTATGCTGGAAACAGCATA
RNF19B_1764.241	GCTCAGGCGGCAGCCGCACC	GTGGAAAGGACGAAACACCG	GTTTAAGAGCTATGCTGGAAACAGCATA	GTGGAAAGGACGAAACACCGGCTCAGGCGGCAGCCGCACCGTTTAAGAGCTATGCTGGAAACAGCATA
RNF19B_1764.240	AGGCGCGGGGCCCGCTCAGG	GTGGAAAGGACGAAACACCG	GTTTAAGAGCTATGCTGGAAACAGCATA	GTGGAAAGGACGAAACACCGAGGCGCGGGGCCCGCTCAGGGTTTAAGAGCTATGCTGGAAACAGCATA
RNF19B_1764.238	CGGACAGCTGAGGAGGCGCG	GTGGAAAGGACGAAACACCG	GTTTAAGAGCTATGCTGGAAACAGCATA	GTGGAAAGGACGAAACACCGCGGACAGCTGAGGAGGCGCGGTTTAAGAGCTATGCTGGAAACAGCATA
RNF19B_1764.234	ACGAGCGGTGCGGACAGCTG	GTGGAAAGGACGAAACACCG	GTTTAAGAGCTATGCTGGAAACAGCATA	GTGGAAAGGACGAAACACCGACGAGCGGTGCGGACAGCTGGTTTAAGAGCTATGCTGGAAACAGCATA
RNF19B_1764.232	GGAGGCAGTCCCGGCACGAG	GTGGAAAGGACGAAACACCG	GTTTAAGAGCTATGCTGGAAACAGCATA	GTGGAAAGGACGAAACACCGGGAGGCAGTCCCGGCACGAGGTTTAAGAGCTATGCTGGAAACAGCATA
RNF19B_1764.228	TTATCTCCAGGCGCAGGTAG	GTGGAAAGGACGAAACACCG	GTTTAAGAGCTATGCTGGAAACAGCATA	GTGGAAAGGACGAAACACCGTTATCTCCAGGCGCAGGTAGGTTTAAGAGCTATGCTGGAAACAGCATA
RNF19B_1764.225	CTGCACTCGGGGCAGCTGAT	GTGGAAAGGACGAAACACCG	GTTTAAGAGCTATGCTGGAAACAGCATA	GTGGAAAGGACGAAACACCGCTGCACTCGGGGCAGCTGATGTTTAAGAGCTATGCTGGAAACAGCATA
RNF19B_1764.52	GCTGCGCCGCTACCTAGCCT	GTGGAAAGGACGAAACACCG	GTTTAAGAGCTATGCTGGAAACAGCATA	GTGGAAAGGACGAAACACCGGCTGCGCCGCTACCTAGCCTGTTTAAGAGCTATGCTGGAAACAGCATA
RNF19B_1764.211	CCAGCGGCAGTCGGGGTCCG	GTGGAAAGGACGAAACACCG	GTTTAAGAGCTATGCTGGAAACAGCATA	GTGGAAAGGACGAAACACCGCCAGCGGCAGTCGGGGTCCGGTTTAAGAGCTATGCTGGAAACAGCATA
RNF19B_1764.209	GCCGGGCACCAGCGGCAGTC	GTGGAAAGGACGAAACACCG	GTTTAAGAGCTATGCTGGAAACAGCATA	GTGGAAAGGACGAAACACCGGCCGGGCACCAGCGGCAGTCGTTTAAGAGCTATGCTGGAAACAGCATA
RNF19B_1764.56	TGGTGCCCGGCCCCGGACTG	GTGGAAAGGACGAAACACCG	GTTTAAGAGCTATGCTGGAAACAGCATA	GTGGAAAGGACGAAACACCGTGGTGCCCGGCCCCGGACTGGTTTAAGAGCTATGCTGGAAACAGCATA
RNF19B_1764.58	GCCCGAAGCTAACTTGTGAG	GTGGAAAGGACGAAACACCG	GTTTAAGAGCTATGCTGGAAACAGCATA	GTGGAAAGGACGAAACACCGGCCCGAAGCTAACTTGTGAGGTTTAAGAGCTATGCTGGAAACAGCATA
RNF19B_1764.188	TATGCACTGCATCGTGGGCA	GTGGAAAGGACGAAACACCG	GTTTAAGAGCTATGCTGGAAACAGCATA	GTGGAAAGGACGAAACACCGTATGCACTGCATCGTGGGCAGTTTAAGAGCTATGCTGGAAACAGCATA
RNF19B_1764.186	ATAATGTATGCACTGCATCG	GTGGAAAGGACGAAACACCG	GTTTAAGAGCTATGCTGGAAACAGCATA	GTGGAAAGGACGAAACACCGATAATGTATGCACTGCATCGGTTTAAGAGCTATGCTGGAAACAGCATA
RNF19B_1764.71	CACATGACCTGTGCAGTGTG	GTGGAAAGGACGAAACACCG	GTTTAAGAGCTATGCTGGAAACAGCATA	GTGGAAAGGACGAAACACCGCACATGACCTGTGCAGTGTGGTTTAAGAGCTATGCTGGAAACAGCATA
RNF19B_1764.84	CGTTGATTGGTGCTCCAGTG	GTGGAAAGGACGAAACACCG	GTTTAAGAGCTATGCTGGAAACAGCATA	GTGGAAAGGACGAAACACCGCGTTGATTGGTGCTCCAGTGGTTTAAGAGCTATGCTGGAAACAGCATA
RNF20_2928.266	GGTCATCAATCATGGACTCC	GTGGAAAGGACGAAACACCG	GTTTAAGAGCTATGCTGGAAACAGCATA	GTGGAAAGGACGAAACACCGGGTCATCAATCATGGACTCCGTTTAAGAGCTATGCTGGAAACAGCATA
RNF20_2928.71	TGCAGTGGAGCAAGTCGTTA	GTGGAAAGGACGAAACACCG	GTTTAAGAGCTATGCTGGAAACAGCATA	GTGGAAAGGACGAAACACCGTGCAGTGGAGCAAGTCGTTAGTTTAAGAGCTATGCTGGAAACAGCATA
RNF20_2928.232	GGAGGGCACTACCACTACGC	GTGGAAAGGACGAAACACCG	GTTTAAGAGCTATGCTGGAAACAGCATA	GTGGAAAGGACGAAACACCGGGAGGGCACTACCACTACGCGTTTAAGAGCTATGCTGGAAACAGCATA
RNF20_2928.185	ACGCATGTTACAGCACGGAC	GTGGAAAGGACGAAACACCG	GTTTAAGAGCTATGCTGGAAACAGCATA	GTGGAAAGGACGAAACACCGACGCATGTTACAGCACGGACGTTTAAGAGCTATGCTGGAAACAGCATA
RNF20_2928.175	GTGCTGTAACATGCGTAAAA	GTGGAAAGGACGAAACACCG	GTTTAAGAGCTATGCTGGAAACAGCATA	GTGGAAAGGACGAAACACCGGTGCTGTAACATGCGTAAAAGTTTAAGAGCTATGCTGGAAACAGCATA
RNF20_2928.183	CTTGGGACATTTGCGCTGGC	GTGGAAAGGACGAAACACCG	GTTTAAGAGCTATGCTGGAAACAGCATA	GTGGAAAGGACGAAACACCGCTTGGGACATTTGCGCTGGCGTTTAAGAGCTATGCTGGAAACAGCATA
RNF20_2928.181	TACACTTGGGACATTTGCGC	GTGGAAAGGACGAAACACCG	GTTTAAGAGCTATGCTGGAAACAGCATA	GTGGAAAGGACGAAACACCGTACACTTGGGACATTTGCGCGTTTAAGAGCTATGCTGGAAACAGCATA
RNF20_2928.180	CCAAAAGCAGCATTACACTT	GTGGAAAGGACGAAACACCG	GTTTAAGAGCTATGCTGGAAACAGCATA	GTGGAAAGGACGAAACACCGCCAAAAGCAGCATTACACTTGTTTAAGAGCTATGCTGGAAACAGCATA
RNF207_1905.315	CGTACTGCACGTGGCACAGC	GTGGAAAGGACGAAACACCG	GTTTAAGAGCTATGCTGGAAACAGCATA	GTGGAAAGGACGAAACACCGCGTACTGCACGTGGCACAGCGTTTAAGAGCTATGCTGGAAACAGCATA
RNF207_1905.313	ACGGGCGCTCGTACTGCACG	GTGGAAAGGACGAAACACCG	GTTTAAGAGCTATGCTGGAAACAGCATA	GTGGAAAGGACGAAACACCGACGGGCGCTCGTACTGCACGGTTTAAGAGCTATGCTGGAAACAGCATA
RNF207_1905.5	GTACGAGCGCCCGTGTCTTC	GTGGAAAGGACGAAACACCG	GTTTAAGAGCTATGCTGGAAACAGCATA	GTGGAAAGGACGAAACACCGGTACGAGCGCCCGTGTCTTCGTTTAAGAGCTATGCTGGAAACAGCATA
RNF207_1905.310	GGCAGCCGGCACAGAAGTCG	GTGGAAAGGACGAAACACCG	GTTTAAGAGCTATGCTGGAAACAGCATA	GTGGAAAGGACGAAACACCGGGCAGCCGGCACAGAAGTCGGTTTAAGAGCTATGCTGGAAACAGCATA
RNF207_1905.8	CTGCGTGGCCGCGCGACCGA	GTGGAAAGGACGAAACACCG	GTTTAAGAGCTATGCTGGAAACAGCATA	GTGGAAAGGACGAAACACCGCTGCGTGGCCGCGCGACCGAGTTTAAGAGCTATGCTGGAAACAGCATA
RNF207_1905.306	CGGGCAGGTGAGGCGGCCGT	GTGGAAAGGACGAAACACCG	GTTTAAGAGCTATGCTGGAAACAGCATA	GTGGAAAGGACGAAACACCGCGGGCAGGTGAGGCGGCCGTGTTTAAGAGCTATGCTGGAAACAGCATA
RNF207_1905.288	TCGCGGCAGCGCGCGCATAG	GTGGAAAGGACGAAACACCG	GTTTAAGAGCTATGCTGGAAACAGCATA	GTGGAAAGGACGAAACACCGTCGCGGCAGCGCGCGCATAGGTTTAAGAGCTATGCTGGAAACAGCATA
RNF207_1905.264	CAGCGCGATGGCCTCCCGCG	GTGGAAAGGACGAAACACCG	GTTTAAGAGCTATGCTGGAAACAGCATA	GTGGAAAGGACGAAACACCGCAGCGCGATGGCCTCCCGCGGTTTAAGAGCTATGCTGGAAACAGCATA
RNF207_1905.60	GACGCTATCCACGCCCTCTT	GTGGAAAGGACGAAACACCG	GTTTAAGAGCTATGCTGGAAACAGCATA	GTGGAAAGGACGAAACACCGGACGCTATCCACGCCCTCTTGTTTAAGAGCTATGCTGGAAACAGCATA
RNF212_894.97	ACGACGTCCTGTGGGGCGGC	GTGGAAAGGACGAAACACCG	GTTTAAGAGCTATGCTGGAAACAGCATA	GTGGAAAGGACGAAACACCGACGACGTCCTGTGGGGCGGCGTTTAAGAGCTATGCTGGAAACAGCATA
RNF212_894.96	AAGCACGACGTCCTGTGGGG	GTGGAAAGGACGAAACACCG	GTTTAAGAGCTATGCTGGAAACAGCATA	GTGGAAAGGACGAAACACCGAAGCACGACGTCCTGTGGGGGTTTAAGAGCTATGCTGGAAACAGCATA
RNF212_894.94	GCTGAAGCACGACGTCCTGT	GTGGAAAGGACGAAACACCG	GTTTAAGAGCTATGCTGGAAACAGCATA	GTGGAAAGGACGAAACACCGGCTGAAGCACGACGTCCTGTGTTTAAGAGCTATGCTGGAAACAGCATA
RNF212_894.92	ACACGTGCCCGCAGTTGGTG	GTGGAAAGGACGAAACACCG	GTTTAAGAGCTATGCTGGAAACAGCATA	GTGGAAAGGACGAAACACCGACACGTGCCCGCAGTTGGTGGTTTAAGAGCTATGCTGGAAACAGCATA
RNF212_894.91	GCAGTACACGTGCCCGCAGT	GTGGAAAGGACGAAACACCG	GTTTAAGAGCTATGCTGGAAACAGCATA	GTGGAAAGGACGAAACACCGGCAGTACACGTGCCCGCAGTGTTTAAGAGCTATGCTGGAAACAGCATA
RNF212_894.3	GTGTACTGCGACGCCTGCCT	GTGGAAAGGACGAAACACCG	GTTTAAGAGCTATGCTGGAAACAGCATA	GTGGAAAGGACGAAACACCGGTGTACTGCGACGCCTGCCTGTTTAAGAGCTATGCTGGAAACAGCATA
RNF212B_903.111	CCCCATCTTTTCGGAAGCAC	GTGGAAAGGACGAAACACCG	GTTTAAGAGCTATGCTGGAAACAGCATA	GTGGAAAGGACGAAACACCGCCCCATCTTTTCGGAAGCACGTTTAAGAGCTATGCTGGAAACAGCATA
RNF212B_903.0	AACCAGTGCTTCCGAAAAGA	GTGGAAAGGACGAAACACCG	GTTTAAGAGCTATGCTGGAAACAGCATA	GTGGAAAGGACGAAACACCGAACCAGTGCTTCCGAAAAGAGTTTAAGAGCTATGCTGGAAACAGCATA
RNF212B_903.2	CCAGTGCTTCCGAAAAGATG	GTGGAAAGGACGAAACACCG	GTTTAAGAGCTATGCTGGAAACAGCATA	GTGGAAAGGACGAAACACCGCCAGTGCTTCCGAAAAGATGGTTTAAGAGCTATGCTGGAAACAGCATA
RNF212B_903.107	ACAGAAAATATGGCCACAGC	GTGGAAAGGACGAAACACCG	GTTTAAGAGCTATGCTGGAAACAGCATA	GTGGAAAGGACGAAACACCGACAGAAAATATGGCCACAGCGTTTAAGAGCTATGCTGGAAACAGCATA
RNF212B_903.4	CTGTAAAAAGTGTGTGACTC	GTGGAAAGGACGAAACACCG	GTTTAAGAGCTATGCTGGAAACAGCATA	GTGGAAAGGACGAAACACCGCTGTAAAAAGTGTGTGACTCGTTTAAGAGCTATGCTGGAAACAGCATA
RNF212B_903.6	TGGAACTGCCTGCAAGCATC	GTGGAAAGGACGAAACACCG	GTTTAAGAGCTATGCTGGAAACAGCATA	GTGGAAAGGACGAAACACCGTGGAACTGCCTGCAAGCATCGTTTAAGAGCTATGCTGGAAACAGCATA
RNF213_15624.36	ACAGCCACCACGCCACTGGA	GTGGAAAGGACGAAACACCG	GTTTAAGAGCTATGCTGGAAACAGCATA	GTGGAAAGGACGAAACACCGACAGCCACCACGCCACTGGAGTTTAAGAGCTATGCTGGAAACAGCATA
RNF213_15624.74	ACTGCAGACCACCGAGCAAC	GTGGAAAGGACGAAACACCG	GTTTAAGAGCTATGCTGGAAACAGCATA	GTGGAAAGGACGAAACACCGACTGCAGACCACCGAGCAACGTTTAAGAGCTATGCTGGAAACAGCATA
RNF213_15624.1695	CACCACGCCGCAGGTCGCTA	GTGGAAAGGACGAAACACCG	GTTTAAGAGCTATGCTGGAAACAGCATA	GTGGAAAGGACGAAACACCGCACCACGCCGCAGGTCGCTAGTTTAAGAGCTATGCTGGAAACAGCATA
RNF213_15624.1692	GTGCACCTTGACCAGCTTTA	GTGGAAAGGACGAAACACCG	GTTTAAGAGCTATGCTGGAAACAGCATA	GTGGAAAGGACGAAACACCGGTGCACCTTGACCAGCTTTAGTTTAAGAGCTATGCTGGAAACAGCATA
RNF213_15624.544	AAATGTGGCCTTCGCCAATA	GTGGAAAGGACGAAACACCG	GTTTAAGAGCTATGCTGGAAACAGCATA	GTGGAAAGGACGAAACACCGAAATGTGGCCTTCGCCAATAGTTTAAGAGCTATGCTGGAAACAGCATA
RNF213_15624.877	TCAGCCGTGCTCCATCTGCC	GTGGAAAGGACGAAACACCG	GTTTAAGAGCTATGCTGGAAACAGCATA	GTGGAAAGGACGAAACACCGTCAGCCGTGCTCCATCTGCCGTTTAAGAGCTATGCTGGAAACAGCATA
RNF213_15624.1363	CGGGGTCCTTTGCATCTCCC	GTGGAAAGGACGAAACACCG	GTTTAAGAGCTATGCTGGAAACAGCATA	GTGGAAAGGACGAAACACCGCGGGGTCCTTTGCATCTCCCGTTTAAGAGCTATGCTGGAAACAGCATA
RNF213_15624.1362	GGTCGCAGGGCAGACAGACG	GTGGAAAGGACGAAACACCG	GTTTAAGAGCTATGCTGGAAACAGCATA	GTGGAAAGGACGAAACACCGGGTCGCAGGGCAGACAGACGGTTTAAGAGCTATGCTGGAAACAGCATA
RNF213_15624.1358	CAGGCAGTGCACGTGGTCGC	GTGGAAAGGACGAAACACCG	GTTTAAGAGCTATGCTGGAAACAGCATA	GTGGAAAGGACGAAACACCGCAGGCAGTGCACGTGGTCGCGTTTAAGAGCTATGCTGGAAACAGCATA
RNF213_15624.1357	GGCAGCGCAGGCAGTGCACG	GTGGAAAGGACGAAACACCG	GTTTAAGAGCTATGCTGGAAACAGCATA	GTGGAAAGGACGAAACACCGGGCAGCGCAGGCAGTGCACGGTTTAAGAGCTATGCTGGAAACAGCATA
RNF213_15624.1354	CATCTGCTCTGAGGCAAACC	GTGGAAAGGACGAAACACCG	GTTTAAGAGCTATGCTGGAAACAGCATA	GTGGAAAGGACGAAACACCGCATCTGCTCTGAGGCAAACCGTTTAAGAGCTATGCTGGAAACAGCATA
RNF214_2112.139	CATTAGACATAGCTTACAGG	GTGGAAAGGACGAAACACCG	GTTTAAGAGCTATGCTGGAAACAGCATA	GTGGAAAGGACGAAACACCGCATTAGACATAGCTTACAGGGTTTAAGAGCTATGCTGGAAACAGCATA
RNF214_2112.137	CACTGGGCTGGACGAGTTTC	GTGGAAAGGACGAAACACCG	GTTTAAGAGCTATGCTGGAAACAGCATA	GTGGAAAGGACGAAACACCGCACTGGGCTGGACGAGTTTCGTTTAAGAGCTATGCTGGAAACAGCATA
RNF214_2112.136	TTGGATGCAGCTCACTGGGC	GTGGAAAGGACGAAACACCG	GTTTAAGAGCTATGCTGGAAACAGCATA	GTGGAAAGGACGAAACACCGTTGGATGCAGCTCACTGGGCGTTTAAGAGCTATGCTGGAAACAGCATA
RNF214_2112.134	CGCCATTGGATGCAGCTCAC	GTGGAAAGGACGAAACACCG	GTTTAAGAGCTATGCTGGAAACAGCATA	GTGGAAAGGACGAAACACCGCGCCATTGGATGCAGCTCACGTTTAAGAGCTATGCTGGAAACAGCATA
RNF214_2112.133	AATACATGGGTACACGCCAT	GTGGAAAGGACGAAACACCG	GTTTAAGAGCTATGCTGGAAACAGCATA	GTGGAAAGGACGAAACACCGAATACATGGGTACACGCCATGTTTAAGAGCTATGCTGGAAACAGCATA
RNF214_2112.123	GTGTACCCATGTATTGCACA	GTGGAAAGGACGAAACACCG	GTTTAAGAGCTATGCTGGAAACAGCATA	GTGGAAAGGACGAAACACCGGTGTACCCATGTATTGCACAGTTTAAGAGCTATGCTGGAAACAGCATA
RNF214_2112.129	AAGTGTCATTTGTGTTGGTC	GTGGAAAGGACGAAACACCG	GTTTAAGAGCTATGCTGGAAACAGCATA	GTGGAAAGGACGAAACACCGAAGTGTCATTTGTGTTGGTCGTTTAAGAGCTATGCTGGAAACAGCATA
RNF215_1134.237	GGCGGCGGCGATCTCAGCGC	GTGGAAAGGACGAAACACCG	GTTTAAGAGCTATGCTGGAAACAGCATA	GTGGAAAGGACGAAACACCGGGCGGCGGCGATCTCAGCGCGTTTAAGAGCTATGCTGGAAACAGCATA
RNF215_1134.86	GCTGTGGAACGCCATCCTGC	GTGGAAAGGACGAAACACCG	GTTTAAGAGCTATGCTGGAAACAGCATA	GTGGAAAGGACGAAACACCGGCTGTGGAACGCCATCCTGCGTTTAAGAGCTATGCTGGAAACAGCATA
RNF215_1134.88	GTGGCCATGCTCCTGTGCAC	GTGGAAAGGACGAAACACCG	GTTTAAGAGCTATGCTGGAAACAGCATA	GTGGAAAGGACGAAACACCGGTGGCCATGCTCCTGTGCACGTTTAAGAGCTATGCTGGAAACAGCATA
RNF215_1134.134	GTAGTCCAGGCACACCGCAC	GTGGAAAGGACGAAACACCG	GTTTAAGAGCTATGCTGGAAACAGCATA	GTGGAAAGGACGAAACACCGGTAGTCCAGGCACACCGCACGTTTAAGAGCTATGCTGGAAACAGCATA
RNF215_1134.133	GTTTGTTGCAGAAGTAGTCC	GTGGAAAGGACGAAACACCG	GTTTAAGAGCTATGCTGGAAACAGCATA	GTGGAAAGGACGAAACACCGGTTTGTTGCAGAAGTAGTCCGTTTAAGAGCTATGCTGGAAACAGCATA
RNF215_1134.132	CGTGCTTACAGGGCAGCACC	GTGGAAAGGACGAAACACCG	GTTTAAGAGCTATGCTGGAAACAGCATA	GTGGAAAGGACGAAACACCGCGTGCTTACAGGGCAGCACCGTTTAAGAGCTATGCTGGAAACAGCATA
RNF215_1134.130	TCGGTGAAACTCGTGCTTAC	GTGGAAAGGACGAAACACCG	GTTTAAGAGCTATGCTGGAAACAGCATA	GTGGAAAGGACGAAACACCGTCGGTGAAACTCGTGCTTACGTTTAAGAGCTATGCTGGAAACAGCATA
RNF215_1134.116	CGAGTTTCACCGAGACTGTG	GTGGAAAGGACGAAACACCG	GTTTAAGAGCTATGCTGGAAACAGCATA	GTGGAAAGGACGAAACACCGCGAGTTTCACCGAGACTGTGGTTTAAGAGCTATGCTGGAAACAGCATA
RNF215_1134.127	GTCTGCTGGAGCATCAGCCA	GTGGAAAGGACGAAACACCG	GTTTAAGAGCTATGCTGGAAACAGCATA	GTGGAAAGGACGAAACACCGGTCTGCTGGAGCATCAGCCAGTTTAAGAGCTATGCTGGAAACAGCATA
RNF215_1134.123	GGACGTTGAATTTGCACAGT	GTGGAAAGGACGAAACACCG	GTTTAAGAGCTATGCTGGAAACAGCATA	GTGGAAAGGACGAAACACCGGGACGTTGAATTTGCACAGTGTTTAAGAGCTATGCTGGAAACAGCATA
RNF215_1134.118	ACTGTGCAAATTCAACGTCC	GTGGAAAGGACGAAACACCG	GTTTAAGAGCTATGCTGGAAACAGCATA	GTGGAAAGGACGAAACACCGACTGTGCAAATTCAACGTCCGTTTAAGAGCTATGCTGGAAACAGCATA
RNF217_1629.97	CATCAAGTATAAGTACTTCT	GTGGAAAGGACGAAACACCG	GTTTAAGAGCTATGCTGGAAACAGCATA	GTGGAAAGGACGAAACACCGCATCAAGTATAAGTACTTCTGTTTAAGAGCTATGCTGGAAACAGCATA
RNF217_1629.170	GCTTGGTGCTGGAATCAATA	GTGGAAAGGACGAAACACCG	GTTTAAGAGCTATGCTGGAAACAGCATA	GTGGAAAGGACGAAACACCGGCTTGGTGCTGGAATCAATAGTTTAAGAGCTATGCTGGAAACAGCATA
RNF217_1629.168	CTTGCACTGAGGACATGGCT	GTGGAAAGGACGAAACACCG	GTTTAAGAGCTATGCTGGAAACAGCATA	GTGGAAAGGACGAAACACCGCTTGCACTGAGGACATGGCTGTTTAAGAGCTATGCTGGAAACAGCATA
RNF217_1629.164	CTTTCTGATCTGGAAGGGGT	GTGGAAAGGACGAAACACCG	GTTTAAGAGCTATGCTGGAAACAGCATA	GTGGAAAGGACGAAACACCGCTTTCTGATCTGGAAGGGGTGTTTAAGAGCTATGCTGGAAACAGCATA
RNF217_1629.158	CGAATTGGCAGGTAGGGCAC	GTGGAAAGGACGAAACACCG	GTTTAAGAGCTATGCTGGAAACAGCATA	GTGGAAAGGACGAAACACCGCGAATTGGCAGGTAGGGCACGTTTAAGAGCTATGCTGGAAACAGCATA
RNF217_1629.156	CACCAGACGAATTGGCAGGT	GTGGAAAGGACGAAACACCG	GTTTAAGAGCTATGCTGGAAACAGCATA	GTGGAAAGGACGAAACACCGCACCAGACGAATTGGCAGGTGTTTAAGAGCTATGCTGGAAACAGCATA
RNF217_1629.154	ACTTAAAACACCAGACGAAT	GTGGAAAGGACGAAACACCG	GTTTAAGAGCTATGCTGGAAACAGCATA	GTGGAAAGGACGAAACACCGACTTAAAACACCAGACGAATGTTTAAGAGCTATGCTGGAAACAGCATA
RNF217_1629.150	CTTGCACTTTGGACACTTCT	GTGGAAAGGACGAAACACCG	GTTTAAGAGCTATGCTGGAAACAGCATA	GTGGAAAGGACGAAACACCGCTTGCACTTTGGACACTTCTGTTTAAGAGCTATGCTGGAAACAGCATA
RNF217_1629.147	ATCCTTCAGTTCGCTGGATG	GTGGAAAGGACGAAACACCG	GTTTAAGAGCTATGCTGGAAACAGCATA	GTGGAAAGGACGAAACACCGATCCTTCAGTTCGCTGGATGGTTTAAGAGCTATGCTGGAAACAGCATA
RNF217_1629.146	GGTCACATCCTTCAGTTCGC	GTGGAAAGGACGAAACACCG	GTTTAAGAGCTATGCTGGAAACAGCATA	GTGGAAAGGACGAAACACCGGGTCACATCCTTCAGTTCGCGTTTAAGAGCTATGCTGGAAACAGCATA
RNF217_1629.145	TACATTGTGAGCAGGTCATA	GTGGAAAGGACGAAACACCG	GTTTAAGAGCTATGCTGGAAACAGCATA	GTGGAAAGGACGAAACACCGTACATTGTGAGCAGGTCATAGTTTAAGAGCTATGCTGGAAACAGCATA
RNF217_1629.111	ACTAATTTTTGTTACCGATG	GTGGAAAGGACGAAACACCG	GTTTAAGAGCTATGCTGGAAACAGCATA	GTGGAAAGGACGAAACACCGACTAATTTTTGTTACCGATGGTTTAAGAGCTATGCTGGAAACAGCATA
RNF217_1629.121	TCTAATTATGGTTTTGGGAT	GTGGAAAGGACGAAACACCG	GTTTAAGAGCTATGCTGGAAACAGCATA	GTGGAAAGGACGAAACACCGTCTAATTATGGTTTTGGGATGTTTAAGAGCTATGCTGGAAACAGCATA
RNF219_2181.175	AAGCAAATGTGGCACGTGAT	GTGGAAAGGACGAAACACCG	GTTTAAGAGCTATGCTGGAAACAGCATA	GTGGAAAGGACGAAACACCGAAGCAAATGTGGCACGTGATGTTTAAGAGCTATGCTGGAAACAGCATA
RNF219_2181.0	CATCACGTGCCACATTTGCT	GTGGAAAGGACGAAACACCG	GTTTAAGAGCTATGCTGGAAACAGCATA	GTGGAAAGGACGAAACACCGCATCACGTGCCACATTTGCTGTTTAAGAGCTATGCTGGAAACAGCATA
RNF219_2181.2	TCACGTGCCACATTTGCTTG	GTGGAAAGGACGAAACACCG	GTTTAAGAGCTATGCTGGAAACAGCATA	GTGGAAAGGACGAAACACCGTCACGTGCCACATTTGCTTGGTTTAAGAGCTATGCTGGAAACAGCATA
RNF219_2181.172	TGGTTGTTGATGCATATGAC	GTGGAAAGGACGAAACACCG	GTTTAAGAGCTATGCTGGAAACAGCATA	GTGGAAAGGACGAAACACCGTGGTTGTTGATGCATATGACGTTTAAGAGCTATGCTGGAAACAGCATA
RNF219_2181.4	GTTCGATTTGTATTGATTTG	GTGGAAAGGACGAAACACCG	GTTTAAGAGCTATGCTGGAAACAGCATA	GTGGAAAGGACGAAACACCGGTTCGATTTGTATTGATTTGGTTTAAGAGCTATGCTGGAAACAGCATA
RNF219_2181.170	GGACTCTGCAAGCTGGACAC	GTGGAAAGGACGAAACACCG	GTTTAAGAGCTATGCTGGAAACAGCATA	GTGGAAAGGACGAAACACCGGGACTCTGCAAGCTGGACACGTTTAAGAGCTATGCTGGAAACAGCATA
RNF220_1701.132	CCAACACTGGATGGACGTTA	GTGGAAAGGACGAAACACCG	GTTTAAGAGCTATGCTGGAAACAGCATA	GTGGAAAGGACGAAACACCGCCAACACTGGATGGACGTTAGTTTAAGAGCTATGCTGGAAACAGCATA
RNF220_1701.113	CCCTAACGTCCATCCAGTGT	GTGGAAAGGACGAAACACCG	GTTTAAGAGCTATGCTGGAAACAGCATA	GTGGAAAGGACGAAACACCGCCCTAACGTCCATCCAGTGTGTTTAAGAGCTATGCTGGAAACAGCATA
RNF220_1701.130	GTGCACGTGCCAACACTGGA	GTGGAAAGGACGAAACACCG	GTTTAAGAGCTATGCTGGAAACAGCATA	GTGGAAAGGACGAAACACCGGTGCACGTGCCAACACTGGAGTTTAAGAGCTATGCTGGAAACAGCATA
RNF220_1701.129	CGCAGTGCACGTGCCAACAC	GTGGAAAGGACGAAACACCG	GTTTAAGAGCTATGCTGGAAACAGCATA	GTGGAAAGGACGAAACACCGCGCAGTGCACGTGCCAACACGTTTAAGAGCTATGCTGGAAACAGCATA
RNF220_1701.114	GTGTTGGCACGTGCACTGCG	GTGGAAAGGACGAAACACCG	GTTTAAGAGCTATGCTGGAAACAGCATA	GTGGAAAGGACGAAACACCGGTGTTGGCACGTGCACTGCGGTTTAAGAGCTATGCTGGAAACAGCATA
RNF220_1701.115	ACGTGCACTGCGAGGAGTGC	GTGGAAAGGACGAAACACCG	GTTTAAGAGCTATGCTGGAAACAGCATA	GTGGAAAGGACGAAACACCGACGTGCACTGCGAGGAGTGCGTTTAAGAGCTATGCTGGAAACAGCATA
RNF220_1701.125	CTGTGATCGTGTTGCACTGA	GTGGAAAGGACGAAACACCG	GTTTAAGAGCTATGCTGGAAACAGCATA	GTGGAAAGGACGAAACACCGCTGTGATCGTGTTGCACTGAGTTTAAGAGCTATGCTGGAAACAGCATA
RNF222_663.159	CCGGAACTTCTCATAGCACA	GTGGAAAGGACGAAACACCG	GTTTAAGAGCTATGCTGGAAACAGCATA	GTGGAAAGGACGAAACACCGCCGGAACTTCTCATAGCACAGTTTAAGAGCTATGCTGGAAACAGCATA
RNF222_663.4	CTATGAGAAGTTCCGGGACC	GTGGAAAGGACGAAACACCG	GTTTAAGAGCTATGCTGGAAACAGCATA	GTGGAAAGGACGAAACACCGCTATGAGAAGTTCCGGGACCGTTTAAGAGCTATGCTGGAAACAGCATA
RNF222_663.156	GCCACAGCTCAGCGTCCGGC	GTGGAAAGGACGAAACACCG	GTTTAAGAGCTATGCTGGAAACAGCATA	GTGGAAAGGACGAAACACCGGCCACAGCTCAGCGTCCGGCGTTTAAGAGCTATGCTGGAAACAGCATA
RNF222_663.9	TGTGTTCTGCCATGACTGCC	GTGGAAAGGACGAAACACCG	GTTTAAGAGCTATGCTGGAAACAGCATA	GTGGAAAGGACGAAACACCGTGTGTTCTGCCATGACTGCCGTTTAAGAGCTATGCTGGAAACAGCATA
RNF222_663.151	CATCCACGCGGGTGGACAGC	GTGGAAAGGACGAAACACCG	GTTTAAGAGCTATGCTGGAAACAGCATA	GTGGAAAGGACGAAACACCGCATCCACGCGGGTGGACAGCGTTTAAGAGCTATGCTGGAAACAGCATA
RNF222_663.12	TGCTGTCCACCCGCGTGGAT	GTGGAAAGGACGAAACACCG	GTTTAAGAGCTATGCTGGAAACAGCATA	GTGGAAAGGACGAAACACCGTGCTGTCCACCCGCGTGGATGTTTAAGAGCTATGCTGGAAACAGCATA
RNF222_663.144	ATGTGACGTAGCGGCAGATG	GTGGAAAGGACGAAACACCG	GTTTAAGAGCTATGCTGGAAACAGCATA	GTGGAAAGGACGAAACACCGATGTGACGTAGCGGCAGATGGTTTAAGAGCTATGCTGGAAACAGCATA
RNF222_663.50	CATCACGCTCATCGCTGTGG	GTGGAAAGGACGAAACACCG	GTTTAAGAGCTATGCTGGAAACAGCATA	GTGGAAAGGACGAAACACCGCATCACGCTCATCGCTGTGGGTTTAAGAGCTATGCTGGAAACAGCATA
RNF222_663.54	GGTGGCCGCCATCCTGCCCT	GTGGAAAGGACGAAACACCG	GTTTAAGAGCTATGCTGGAAACAGCATA	GTGGAAAGGACGAAACACCGGGTGGCCGCCATCCTGCCCTGTTTAAGAGCTATGCTGGAAACAGCATA
RNF223_750.14	GAGTGCTCCATCTGTTTCTC	GTGGAAAGGACGAAACACCG	GTTTAAGAGCTATGCTGGAAACAGCATA	GTGGAAAGGACGAAACACCGGAGTGCTCCATCTGTTTCTCGTTTAAGAGCTATGCTGGAAACAGCATA
RNF223_750.160	TGGGTGCAGGAGAGCTCCTT	GTGGAAAGGACGAAACACCG	GTTTAAGAGCTATGCTGGAAACAGCATA	GTGGAAAGGACGAAACACCGTGGGTGCAGGAGAGCTCCTTGTTTAAGAGCTATGCTGGAAACAGCATA
RNF223_750.16	CTGCACCCACGTCTTCTGCC	GTGGAAAGGACGAAACACCG	GTTTAAGAGCTATGCTGGAAACAGCATA	GTGGAAAGGACGAAACACCGCTGCACCCACGTCTTCTGCCGTTTAAGAGCTATGCTGGAAACAGCATA
RNF223_750.19	CCTGGAGTGCCTGGCCCGGC	GTGGAAAGGACGAAACACCG	GTTTAAGAGCTATGCTGGAAACAGCATA	GTGGAAAGGACGAAACACCGCCTGGAGTGCCTGGCCCGGCGTTTAAGAGCTATGCTGGAAACAGCATA
RNF223_750.23	GCTCAGCCTGTGGGCCGCCC	GTGGAAAGGACGAAACACCG	GTTTAAGAGCTATGCTGGAAACAGCATA	GTGGAAAGGACGAAACACCGGCTCAGCCTGTGGGCCGCCCGTTTAAGAGCTATGCTGGAAACAGCATA
RNF223_750.151	TCACCACCGGGGCGGCCCAC	GTGGAAAGGACGAAACACCG	GTTTAAGAGCTATGCTGGAAACAGCATA	GTGGAAAGGACGAAACACCGTCACCACCGGGGCGGCCCACGTTTAAGAGCTATGCTGGAAACAGCATA
RNF223_750.150	GTACAGCCTCACCACCGGGG	GTGGAAAGGACGAAACACCG	GTTTAAGAGCTATGCTGGAAACAGCATA	GTGGAAAGGACGAAACACCGGTACAGCCTCACCACCGGGGGTTTAAGAGCTATGCTGGAAACAGCATA
RNF223_750.149	AAGGTACAGCCTCACCACCG	GTGGAAAGGACGAAACACCG	GTTTAAGAGCTATGCTGGAAACAGCATA	GTGGAAAGGACGAAACACCGAAGGTACAGCCTCACCACCGGTTTAAGAGCTATGCTGGAAACAGCATA
RNF223_750.58	TGCTCTTCTGTGTGGCACTC	GTGGAAAGGACGAAACACCG	GTTTAAGAGCTATGCTGGAAACAGCATA	GTGGAAAGGACGAAACACCGTGCTCTTCTGTGTGGCACTCGTTTAAGAGCTATGCTGGAAACAGCATA
RNF223_750.91	GTCTTGAGCGCGCACTGCAC	GTGGAAAGGACGAAACACCG	GTTTAAGAGCTATGCTGGAAACAGCATA	GTGGAAAGGACGAAACACCGGTCTTGAGCGCGCACTGCACGTTTAAGAGCTATGCTGGAAACAGCATA
RNF224_471.14	TGCTCGGCCTATGACCTCTC	GTGGAAAGGACGAAACACCG	GTTTAAGAGCTATGCTGGAAACAGCATA	GTGGAAAGGACGAAACACCGTGCTCGGCCTATGACCTCTCGTTTAAGAGCTATGCTGGAAACAGCATA
RNF224_471.102	TGTCCACAGTAGAGGCGGCG	GTGGAAAGGACGAAACACCG	GTTTAAGAGCTATGCTGGAAACAGCATA	GTGGAAAGGACGAAACACCGTGTCCACAGTAGAGGCGGCGGTTTAAGAGCTATGCTGGAAACAGCATA
RNF224_471.17	CTGTGGACACACCTTCTGCC	GTGGAAAGGACGAAACACCG	GTTTAAGAGCTATGCTGGAAACAGCATA	GTGGAAAGGACGAAACACCGCTGTGGACACACCTTCTGCCGTTTAAGAGCTATGCTGGAAACAGCATA
RNF224_471.96	CCAGCCGCCGCACACACGCC	GTGGAAAGGACGAAACACCG	GTTTAAGAGCTATGCTGGAAACAGCATA	GTGGAAAGGACGAAACACCGCCAGCCGCCGCACACACGCCGTTTAAGAGCTATGCTGGAAACAGCATA
RNF224_471.21	TGTGCGGCGGCTGGACACAC	GTGGAAAGGACGAAACACCG	GTTTAAGAGCTATGCTGGAAACAGCATA	GTGGAAAGGACGAAACACCGTGTGCGGCGGCTGGACACACGTTTAAGAGCTATGCTGGAAACAGCATA
RNF224_471.95	ATCCAGCGCTGCTCGGGCGC	GTGGAAAGGACGAAACACCG	GTTTAAGAGCTATGCTGGAAACAGCATA	GTGGAAAGGACGAAACACCGATCCAGCGCTGCTCGGGCGCGTTTAAGAGCTATGCTGGAAACAGCATA
RNF224_471.92	TCTGACGGCACTGCGGACAG	GTGGAAAGGACGAAACACCG	GTTTAAGAGCTATGCTGGAAACAGCATA	GTGGAAAGGACGAAACACCGTCTGACGGCACTGCGGACAGGTTTAAGAGCTATGCTGGAAACAGCATA
RNF224_471.89	GGCGTGCTCTGACGGCACTG	GTGGAAAGGACGAAACACCG	GTTTAAGAGCTATGCTGGAAACAGCATA	GTGGAAAGGACGAAACACCGGGCGTGCTCTGACGGCACTGGTTTAAGAGCTATGCTGGAAACAGCATA
RNF225_990.242	CGAAGGACGACACGCAGATG	GTGGAAAGGACGAAACACCG	GTTTAAGAGCTATGCTGGAAACAGCATA	GTGGAAAGGACGAAACACCGCGAAGGACGACACGCAGATGGTTTAAGAGCTATGCTGGAAACAGCATA
RNF225_990.241	CAGCTTGAACACGCCGTCGA	GTGGAAAGGACGAAACACCG	GTTTAAGAGCTATGCTGGAAACAGCATA	GTGGAAAGGACGAAACACCGCAGCTTGAACACGCCGTCGAGTTTAAGAGCTATGCTGGAAACAGCATA
RNF225_990.240	TGGCCGCAGTCCAGGCGCTT	GTGGAAAGGACGAAACACCG	GTTTAAGAGCTATGCTGGAAACAGCATA	GTGGAAAGGACGAAACACCGTGGCCGCAGTCCAGGCGCTTGTTTAAGAGCTATGCTGGAAACAGCATA
RNF225_990.237	GGCACTCGAGACAGAAGACG	GTGGAAAGGACGAAACACCG	GTTTAAGAGCTATGCTGGAAACAGCATA	GTGGAAAGGACGAAACACCGGGCACTCGAGACAGAAGACGGTTTAAGAGCTATGCTGGAAACAGCATA
RNF225_990.236	TGGCCAACGATAGGCGCGCC	GTGGAAAGGACGAAACACCG	GTTTAAGAGCTATGCTGGAAACAGCATA	GTGGAAAGGACGAAACACCGTGGCCAACGATAGGCGCGCCGTTTAAGAGCTATGCTGGAAACAGCATA
RNF225_990.33	CGCCTATCGTTGGCCACGGC	GTGGAAAGGACGAAACACCG	GTTTAAGAGCTATGCTGGAAACAGCATA	GTGGAAAGGACGAAACACCGCGCCTATCGTTGGCCACGGCGTTTAAGAGCTATGCTGGAAACAGCATA
RNF225_990.38	CGGCAACGCGGTGGCCTGTC	GTGGAAAGGACGAAACACCG	GTTTAAGAGCTATGCTGGAAACAGCATA	GTGGAAAGGACGAAACACCGCGGCAACGCGGTGGCCTGTCGTTTAAGAGCTATGCTGGAAACAGCATA
RNF225_990.170	GCCCGAGACCACGAGGCCCG	GTGGAAAGGACGAAACACCG	GTTTAAGAGCTATGCTGGAAACAGCATA	GTGGAAAGGACGAAACACCGGCCCGAGACCACGAGGCCCGGTTTAAGAGCTATGCTGGAAACAGCATA
RNF24_510.48	CTCGAGGCTTGAAGTCTTCT	GTGGAAAGGACGAAACACCG	GTTTAAGAGCTATGCTGGAAACAGCATA	GTGGAAAGGACGAAACACCGCTCGAGGCTTGAAGTCTTCTGTTTAAGAGCTATGCTGGAAACAGCATA
RNF24_510.12	CTTCAAGCCTCGAGATGAGT	GTGGAAAGGACGAAACACCG	GTTTAAGAGCTATGCTGGAAACAGCATA	GTGGAAAGGACGAAACACCGCTTCAAGCCTCGAGATGAGTGTTTAAGAGCTATGCTGGAAACAGCATA
RNF24_510.47	CAAATCCCCAACTCATCTCG	GTGGAAAGGACGAAACACCG	GTTTAAGAGCTATGCTGGAAACAGCATA	GTGGAAAGGACGAAACACCGCAAATCCCCAACTCATCTCGGTTTAAGAGCTATGCTGGAAACAGCATA
RNF24_510.46	TGTGGAAGGCGTGCTTACAT	GTGGAAAGGACGAAACACCG	GTTTAAGAGCTATGCTGGAAACAGCATA	GTGGAAAGGACGAAACACCGTGTGGAAGGCGTGCTTACATGTTTAAGAGCTATGCTGGAAACAGCATA
RNF24_510.45	CTGTGGAAGGCGTGCTTACA	GTGGAAAGGACGAAACACCG	GTTTAAGAGCTATGCTGGAAACAGCATA	GTGGAAAGGACGAAACACCGCTGTGGAAGGCGTGCTTACAGTTTAAGAGCTATGCTGGAAACAGCATA
RNF24_510.42	GAACCTCCAGCCACTTAATA	GTGGAAAGGACGAAACACCG	GTTTAAGAGCTATGCTGGAAACAGCATA	GTGGAAAGGACGAAACACCGGAACCTCCAGCCACTTAATAGTTTAAGAGCTATGCTGGAAACAGCATA
RNF24_510.39	GTAGAACTGGCATGTTGCAC	GTGGAAAGGACGAAACACCG	GTTTAAGAGCTATGCTGGAAACAGCATA	GTGGAAAGGACGAAACACCGGTAGAACTGGCATGTTGCACGTTTAAGAGCTATGCTGGAAACAGCATA
RNF25_1380.251	GAGATCTGTGGCACCTCATG	GTGGAAAGGACGAAACACCG	GTTTAAGAGCTATGCTGGAAACAGCATA	GTGGAAAGGACGAAACACCGGAGATCTGTGGCACCTCATGGTTTAAGAGCTATGCTGGAAACAGCATA
RNF25_1380.18	ATCTCTATCCGAAATCCCCG	GTGGAAAGGACGAAACACCG	GTTTAAGAGCTATGCTGGAAACAGCATA	GTGGAAAGGACGAAACACCGATCTCTATCCGAAATCCCCGGTTTAAGAGCTATGCTGGAAACAGCATA
RNF25_1380.237	CATAGAGGCAGATGACACAC	GTGGAAAGGACGAAACACCG	GTTTAAGAGCTATGCTGGAAACAGCATA	GTGGAAAGGACGAAACACCGCATAGAGGCAGATGACACACGTTTAAGAGCTATGCTGGAAACAGCATA
RNF25_1380.233	GTAGTGGTAACAGGGTGTTT	GTGGAAAGGACGAAACACCG	GTTTAAGAGCTATGCTGGAAACAGCATA	GTGGAAAGGACGAAACACCGGTAGTGGTAACAGGGTGTTTGTTTAAGAGCTATGCTGGAAACAGCATA
RNF25_1380.232	CAGTGGAAGTAGTGGTAACA	GTGGAAAGGACGAAACACCG	GTTTAAGAGCTATGCTGGAAACAGCATA	GTGGAAAGGACGAAACACCGCAGTGGAAGTAGTGGTAACAGTTTAAGAGCTATGCTGGAAACAGCATA
RNF25_1380.228	GGATGTACCGAGCAAGGCAG	GTGGAAAGGACGAAACACCG	GTTTAAGAGCTATGCTGGAAACAGCATA	GTGGAAAGGACGAAACACCGGGATGTACCGAGCAAGGCAGGTTTAAGAGCTATGCTGGAAACAGCATA
RNF25_1380.227	TGTGCTGGATGTACCGAGCA	GTGGAAAGGACGAAACACCG	GTTTAAGAGCTATGCTGGAAACAGCATA	GTGGAAAGGACGAAACACCGTGTGCTGGATGTACCGAGCAGTTTAAGAGCTATGCTGGAAACAGCATA
RNF25_1380.37	TGCTCGGTACATCCAGCACA	GTGGAAAGGACGAAACACCG	GTTTAAGAGCTATGCTGGAAACAGCATA	GTGGAAAGGACGAAACACCGTGCTCGGTACATCCAGCACAGTTTAAGAGCTATGCTGGAAACAGCATA
RNF25_1380.224	ACGAGGGGCTCTCTGCACAC	GTGGAAAGGACGAAACACCG	GTTTAAGAGCTATGCTGGAAACAGCATA	GTGGAAAGGACGAAACACCGACGAGGGGCTCTCTGCACACGTTTAAGAGCTATGCTGGAAACAGCATA
RNF25_1380.168	TGTCGCCAGGGACCTCGACT	GTGGAAAGGACGAAACACCG	GTTTAAGAGCTATGCTGGAAACAGCATA	GTGGAAAGGACGAAACACCGTGTCGCCAGGGACCTCGACTGTTTAAGAGCTATGCTGGAAACAGCATA
RNF25_1380.75	GGGGAGTGCCACGCCCCTAA	GTGGAAAGGACGAAACACCG	GTTTAAGAGCTATGCTGGAAACAGCATA	GTGGAAAGGACGAAACACCGGGGGAGTGCCACGCCCCTAAGTTTAAGAGCTATGCTGGAAACAGCATA
RNF26_1302.229	GCAGGTTGTAGACGAAGGCC	GTGGAAAGGACGAAACACCG	GTTTAAGAGCTATGCTGGAAACAGCATA	GTGGAAAGGACGAAACACCGGCAGGTTGTAGACGAAGGCCGTTTAAGAGCTATGCTGGAAACAGCATA
RNF26_1302.205	AGAGGTTCTGAGTGCCGATG	GTGGAAAGGACGAAACACCG	GTTTAAGAGCTATGCTGGAAACAGCATA	GTGGAAAGGACGAAACACCGAGAGGTTCTGAGTGCCGATGGTTTAAGAGCTATGCTGGAAACAGCATA
RNF26_1302.115	GAAGAAGTGTGTCATCTGCC	GTGGAAAGGACGAAACACCG	GTTTAAGAGCTATGCTGGAAACAGCATA	GTGGAAAGGACGAAACACCGGAAGAAGTGTGTCATCTGCCGTTTAAGAGCTATGCTGGAAACAGCATA
RNF26_1302.140	GGAGCAACACTGTCTTGCTC	GTGGAAAGGACGAAACACCG	GTTTAAGAGCTATGCTGGAAACAGCATA	GTGGAAAGGACGAAACACCGGGAGCAACACTGTCTTGCTCGTTTAAGAGCTATGCTGGAAACAGCATA
RNF26_1302.135	TTTCAGTGCAGGCCTGGCAC	GTGGAAAGGACGAAACACCG	GTTTAAGAGCTATGCTGGAAACAGCATA	GTGGAAAGGACGAAACACCGTTTCAGTGCAGGCCTGGCACGTTTAAGAGCTATGCTGGAAACAGCATA
RNF26_1302.132	GGTAGACGGGGTGGCGCATC	GTGGAAAGGACGAAACACCG	GTTTAAGAGCTATGCTGGAAACAGCATA	GTGGAAAGGACGAAACACCGGGTAGACGGGGTGGCGCATCGTTTAAGAGCTATGCTGGAAACAGCATA
RNF26_1302.130	GGCAATTGCGGTGGTAGACG	GTGGAAAGGACGAAACACCG	GTTTAAGAGCTATGCTGGAAACAGCATA	GTGGAAAGGACGAAACACCGGGCAATTGCGGTGGTAGACGGTTTAAGAGCTATGCTGGAAACAGCATA
RNF26_1302.128	CGGGCAATTGCGGTGGTAGA	GTGGAAAGGACGAAACACCG	GTTTAAGAGCTATGCTGGAAACAGCATA	GTGGAAAGGACGAAACACCGCGGGCAATTGCGGTGGTAGAGTTTAAGAGCTATGCTGGAAACAGCATA
RNF26_1302.118	GCAATTGCCCGCTCTGCCGC	GTGGAAAGGACGAAACACCG	GTTTAAGAGCTATGCTGGAAACAGCATA	GTGGAAAGGACGAAACACCGGCAATTGCCCGCTCTGCCGCGTTTAAGAGCTATGCTGGAAACAGCATA
RNF26_1302.124	AGGATGCCCCGGCGGCAGAG	GTGGAAAGGACGAAACACCG	GTTTAAGAGCTATGCTGGAAACAGCATA	GTGGAAAGGACGAAACACCGAGGATGCCCCGGCGGCAGAGGTTTAAGAGCTATGCTGGAAACAGCATA
RNF31_2766.25	TGCCATGCTAAATGAGCCTT	GTGGAAAGGACGAAACACCG	GTTTAAGAGCTATGCTGGAAACAGCATA	GTGGAAAGGACGAAACACCGTGCCATGCTAAATGAGCCTTGTTTAAGAGCTATGCTGGAAACAGCATA
RNF31_2766.61	ACCTTCTGCAACTCGAGCCC	GTGGAAAGGACGAAACACCG	GTTTAAGAGCTATGCTGGAAACAGCATA	GTGGAAAGGACGAAACACCGACCTTCTGCAACTCGAGCCCGTTTAAGAGCTATGCTGGAAACAGCATA
RNF31_2766.111	GAGCTCCAGTCTCTAGGCTT	GTGGAAAGGACGAAACACCG	GTTTAAGAGCTATGCTGGAAACAGCATA	GTGGAAAGGACGAAACACCGGAGCTCCAGTCTCTAGGCTTGTTTAAGAGCTATGCTGGAAACAGCATA
RNF31_2766.368	GTTGGCGCTGTAGCTCAGTC	GTGGAAAGGACGAAACACCG	GTTTAAGAGCTATGCTGGAAACAGCATA	GTGGAAAGGACGAAACACCGGTTGGCGCTGTAGCTCAGTCGTTTAAGAGCTATGCTGGAAACAGCATA
RNF31_2766.329	TGGTGCACTCACAGGAAGTC	GTGGAAAGGACGAAACACCG	GTTTAAGAGCTATGCTGGAAACAGCATA	GTGGAAAGGACGAAACACCGTGGTGCACTCACAGGAAGTCGTTTAAGAGCTATGCTGGAAACAGCATA
RNF31_2766.156	GCACTTCACCATCGCCTTGA	GTGGAAAGGACGAAACACCG	GTTTAAGAGCTATGCTGGAAACAGCATA	GTGGAAAGGACGAAACACCGGCACTTCACCATCGCCTTGAGTTTAAGAGCTATGCTGGAAACAGCATA
RNF31_2766.307	CTTCTTATGGAACAACGCAT	GTGGAAAGGACGAAACACCG	GTTTAAGAGCTATGCTGGAAACAGCATA	GTGGAAAGGACGAAACACCGCTTCTTATGGAACAACGCATGTTTAAGAGCTATGCTGGAAACAGCATA
RNF31_2766.159	GTTCCATAAGAAGCTGACCG	GTGGAAAGGACGAAACACCG	GTTTAAGAGCTATGCTGGAAACAGCATA	GTGGAAAGGACGAAACACCGGTTCCATAAGAAGCTGACCGGTTTAAGAGCTATGCTGGAAACAGCATA
RNF31_2766.305	GTCCCGCATCAGCACACCCT	GTGGAAAGGACGAAACACCG	GTTTAAGAGCTATGCTGGAAACAGCATA	GTGGAAAGGACGAAACACCGGTCCCGCATCAGCACACCCTGTTTAAGAGCTATGCTGGAAACAGCATA
RNF31_2766.163	TGCGGGACCCCAAGTTCTTG	GTGGAAAGGACGAAACACCG	GTTTAAGAGCTATGCTGGAAACAGCATA	GTGGAAAGGACGAAACACCGTGCGGGACCCCAAGTTCTTGGTTTAAGAGCTATGCTGGAAACAGCATA
RNF31_2766.165	CATATATGAGCGTGAGCAGC	GTGGAAAGGACGAAACACCG	GTTTAAGAGCTATGCTGGAAACAGCATA	GTGGAAAGGACGAAACACCGCATATATGAGCGTGAGCAGCGTTTAAGAGCTATGCTGGAAACAGCATA
RNF31_2766.296	CACAGAAGGTCTGGTGACAC	GTGGAAAGGACGAAACACCG	GTTTAAGAGCTATGCTGGAAACAGCATA	GTGGAAAGGACGAAACACCGCACAGAAGGTCTGGTGACACGTTTAAGAGCTATGCTGGAAACAGCATA
RNF31_2766.294	GCGCTTGCAGCGCACACAGA	GTGGAAAGGACGAAACACCG	GTTTAAGAGCTATGCTGGAAACAGCATA	GTGGAAAGGACGAAACACCGGCGCTTGCAGCGCACACAGAGTTTAAGAGCTATGCTGGAAACAGCATA
RNF31_2766.292	AGTCCTCACAGCTCCGACCT	GTGGAAAGGACGAAACACCG	GTTTAAGAGCTATGCTGGAAACAGCATA	GTGGAAAGGACGAAACACCGAGTCCTCACAGCTCCGACCTGTTTAAGAGCTATGCTGGAAACAGCATA
RNF31_3219.405	TCCCAGAGGCGCTGGCGGAA	GTGGAAAGGACGAAACACCG	GTTTAAGAGCTATGCTGGAAACAGCATA	GTGGAAAGGACGAAACACCGTCCCAGAGGCGCTGGCGGAAGTTTAAGAGCTATGCTGGAAACAGCATA
RNF31_2766.152	AGGAGTGTGCCGTGTGTGGC	GTGGAAAGGACGAAACACCG	GTTTAAGAGCTATGCTGGAAACAGCATA	GTGGAAAGGACGAAACACCGAGGAGTGTGCCGTGTGTGGCGTTTAAGAGCTATGCTGGAAACAGCATA
RNF31_2766.326	AAGTGCTGGCGGAAGCAGTC	GTGGAAAGGACGAAACACCG	GTTTAAGAGCTATGCTGGAAACAGCATA	GTGGAAAGGACGAAACACCGAAGTGCTGGCGGAAGCAGTCGTTTAAGAGCTATGCTGGAAACAGCATA
RNF31_2766.319	GGTGAGGTCGGGGCGGCCAC	GTGGAAAGGACGAAACACCG	GTTTAAGAGCTATGCTGGAAACAGCATA	GTGGAAAGGACGAAACACCGGGTGAGGTCGGGGCGGCCACGTTTAAGAGCTATGCTGGAAACAGCATA
RNF31_2766.282	GGCGTACGAGAACTTGCATT	GTGGAAAGGACGAAACACCG	GTTTAAGAGCTATGCTGGAAACAGCATA	GTGGAAAGGACGAAACACCGGGCGTACGAGAACTTGCATTGTTTAAGAGCTATGCTGGAAACAGCATA
RNF31_2766.179	ATGCAAGTTCTCGTACGCCC	GTGGAAAGGACGAAACACCG	GTTTAAGAGCTATGCTGGAAACAGCATA	GTGGAAAGGACGAAACACCGATGCAAGTTCTCGTACGCCCGTTTAAGAGCTATGCTGGAAACAGCATA
RNF31_2766.277	GCAGAACTGGTGGCGGCACT	GTGGAAAGGACGAAACACCG	GTTTAAGAGCTATGCTGGAAACAGCATA	GTGGAAAGGACGAAACACCGGCAGAACTGGTGGCGGCACTGTTTAAGAGCTATGCTGGAAACAGCATA
RNF31_2766.270	TTCACCCTGCAGTTAGGCTC	GTGGAAAGGACGAAACACCG	GTTTAAGAGCTATGCTGGAAACAGCATA	GTGGAAAGGACGAAACACCGTTCACCCTGCAGTTAGGCTCGTTTAAGAGCTATGCTGGAAACAGCATA
RNF32_1089.100	TCTTCTTTACAGATGGGGCA	GTGGAAAGGACGAAACACCG	GTTTAAGAGCTATGCTGGAAACAGCATA	GTGGAAAGGACGAAACACCGTCTTCTTTACAGATGGGGCAGTTTAAGAGCTATGCTGGAAACAGCATA
RNF32_1089.97	CTCGAATTCTTCTTTACAGA	GTGGAAAGGACGAAACACCG	GTTTAAGAGCTATGCTGGAAACAGCATA	GTGGAAAGGACGAAACACCGCTCGAATTCTTCTTTACAGAGTTTAAGAGCTATGCTGGAAACAGCATA
RNF32_1089.92	GTTCTTTCTACAGAGAGGAC	GTGGAAAGGACGAAACACCG	GTTTAAGAGCTATGCTGGAAACAGCATA	GTGGAAAGGACGAAACACCGGTTCTTTCTACAGAGAGGACGTTTAAGAGCTATGCTGGAAACAGCATA
RNF32_1089.91	TACTGGTTCTTTCTACAGAG	GTGGAAAGGACGAAACACCG	GTTTAAGAGCTATGCTGGAAACAGCATA	GTGGAAAGGACGAAACACCGTACTGGTTCTTTCTACAGAGGTTTAAGAGCTATGCTGGAAACAGCATA
RNF32_1089.83	CACATCCTCTCCAGTAGGCT	GTGGAAAGGACGAAACACCG	GTTTAAGAGCTATGCTGGAAACAGCATA	GTGGAAAGGACGAAACACCGCACATCCTCTCCAGTAGGCTGTTTAAGAGCTATGCTGGAAACAGCATA
RNF32_1089.68	CAGGCAGATGGAGCACTCGT	GTGGAAAGGACGAAACACCG	GTTTAAGAGCTATGCTGGAAACAGCATA	GTGGAAAGGACGAAACACCGCAGGCAGATGGAGCACTCGTGTTTAAGAGCTATGCTGGAAACAGCATA
RNF32_1089.63	GACCGCCAGCAGCGGAGAGA	GTGGAAAGGACGAAACACCG	GTTTAAGAGCTATGCTGGAAACAGCATA	GTGGAAAGGACGAAACACCGGACCGCCAGCAGCGGAGAGAGTTTAAGAGCTATGCTGGAAACAGCATA
RNF32_1089.61	CACGCGCTGACCGCCAGCAG	GTGGAAAGGACGAAACACCG	GTTTAAGAGCTATGCTGGAAACAGCATA	GTGGAAAGGACGAAACACCGCACGCGCTGACCGCCAGCAGGTTTAAGAGCTATGCTGGAAACAGCATA
RNF32_1089.36	GCTGCTGGCGGTCAGCGCGT	GTGGAAAGGACGAAACACCG	GTTTAAGAGCTATGCTGGAAACAGCATA	GTGGAAAGGACGAAACACCGGCTGCTGGCGGTCAGCGCGTGTTTAAGAGCTATGCTGGAAACAGCATA
RNF32_1089.37	GGCGGTCAGCGCGTGGGTGC	GTGGAAAGGACGAAACACCG	GTTTAAGAGCTATGCTGGAAACAGCATA	GTGGAAAGGACGAAACACCGGGCGGTCAGCGCGTGGGTGCGTTTAAGAGCTATGCTGGAAACAGCATA
RNF32_1089.56	ATGGTGGAACACATGTGAGC	GTGGAAAGGACGAAACACCG	GTTTAAGAGCTATGCTGGAAACAGCATA	GTGGAAAGGACGAAACACCGATGGTGGAACACATGTGAGCGTTTAAGAGCTATGCTGGAAACAGCATA
RNF32_1089.54	CTAGTGCCAGCAGACACGCA	GTGGAAAGGACGAAACACCG	GTTTAAGAGCTATGCTGGAAACAGCATA	GTGGAAAGGACGAAACACCGCTAGTGCCAGCAGACACGCAGTTTAAGAGCTATGCTGGAAACAGCATA
RNF32_1089.43	GCACTAGAGGAGTTCTCCGT	GTGGAAAGGACGAAACACCG	GTTTAAGAGCTATGCTGGAAACAGCATA	GTGGAAAGGACGAAACACCGGCACTAGAGGAGTTCTCCGTGTTTAAGAGCTATGCTGGAAACAGCATA
RNF34_1122.98	GACTGAAAATGAAAGCCCAC	GTGGAAAGGACGAAACACCG	GTTTAAGAGCTATGCTGGAAACAGCATA	GTGGAAAGGACGAAACACCGGACTGAAAATGAAAGCCCACGTTTAAGAGCTATGCTGGAAACAGCATA
RNF34_1122.17	TGTTTGCTGTGACTGCAAGA	GTGGAAAGGACGAAACACCG	GTTTAAGAGCTATGCTGGAAACAGCATA	GTGGAAAGGACGAAACACCGTGTTTGCTGTGACTGCAAGAGTTTAAGAGCTATGCTGGAAACAGCATA
RNF34_1122.71	CATCCATGCAGATGCGACAC	GTGGAAAGGACGAAACACCG	GTTTAAGAGCTATGCTGGAAACAGCATA	GTGGAAAGGACGAAACACCGCATCCATGCAGATGCGACACGTTTAAGAGCTATGCTGGAAACAGCATA
RNF34_1122.70	CAGTAGGACACAGTCGATGA	GTGGAAAGGACGAAACACCG	GTTTAAGAGCTATGCTGGAAACAGCATA	GTGGAAAGGACGAAACACCGCAGTAGGACACAGTCGATGAGTTTAAGAGCTATGCTGGAAACAGCATA
RNF34_1122.56	CGTCATCGACTGTGTCCTAC	GTGGAAAGGACGAAACACCG	GTTTAAGAGCTATGCTGGAAACAGCATA	GTGGAAAGGACGAAACACCGCGTCATCGACTGTGTCCTACGTTTAAGAGCTATGCTGGAAACAGCATA
RNF34_1122.59	CCTACTGGAGTGTGGGCACA	GTGGAAAGGACGAAACACCG	GTTTAAGAGCTATGCTGGAAACAGCATA	GTGGAAAGGACGAAACACCGCCTACTGGAGTGTGGGCACAGTTTAAGAGCTATGCTGGAAACAGCATA
RNF34_1122.68	GCGCTTGCCGCACTTGGTGC	GTGGAAAGGACGAAACACCG	GTTTAAGAGCTATGCTGGAAACAGCATA	GTGGAAAGGACGAAACACCGGCGCTTGCCGCACTTGGTGCGTTTAAGAGCTATGCTGGAAACAGCATA
RNF34_1122.67	ACTCATGCGCTTGCCGCACT	GTGGAAAGGACGAAACACCG	GTTTAAGAGCTATGCTGGAAACAGCATA	GTGGAAAGGACGAAACACCGACTCATGCGCTTGCCGCACTGTTTAAGAGCTATGCTGGAAACAGCATA
RNF34_1122.61	TGAGTGAGTGTCCCATCTGC	GTGGAAAGGACGAAACACCG	GTTTAAGAGCTATGCTGGAAACAGCATA	GTGGAAAGGACGAAACACCGTGAGTGAGTGTCCCATCTGCGTTTAAGAGCTATGCTGGAAACAGCATA
RNF34_1122.64	CGGCTCGCACCACATACTGC	GTGGAAAGGACGAAACACCG	GTTTAAGAGCTATGCTGGAAACAGCATA	GTGGAAAGGACGAAACACCGCGGCTCGCACCACATACTGCGTTTAAGAGCTATGCTGGAAACAGCATA
RNF38_1548.188	AGGCGCTGTCTCTTAGGACT	GTGGAAAGGACGAAACACCG	GTTTAAGAGCTATGCTGGAAACAGCATA	GTGGAAAGGACGAAACACCGAGGCGCTGTCTCTTAGGACTGTTTAAGAGCTATGCTGGAAACAGCATA
RNF38_1548.171	CTTCCTCTCTGGCGCCTGAC	GTGGAAAGGACGAAACACCG	GTTTAAGAGCTATGCTGGAAACAGCATA	GTGGAAAGGACGAAACACCGCTTCCTCTCTGGCGCCTGACGTTTAAGAGCTATGCTGGAAACAGCATA
RNF38_1548.52	GCATGTGTGATTTTGAGTCA	GTGGAAAGGACGAAACACCG	GTTTAAGAGCTATGCTGGAAACAGCATA	GTGGAAAGGACGAAACACCGGCATGTGTGATTTTGAGTCAGTTTAAGAGCTATGCTGGAAACAGCATA
RNF38_1548.64	GCATGGAACTCGTGGTTACA	GTGGAAAGGACGAAACACCG	GTTTAAGAGCTATGCTGGAAACAGCATA	GTGGAAAGGACGAAACACCGGCATGGAACTCGTGGTTACAGTTTAAGAGCTATGCTGGAAACAGCATA
RNF38_1548.63	GGCATGGAACTCGTGGTTAC	GTGGAAAGGACGAAACACCG	GTTTAAGAGCTATGCTGGAAACAGCATA	GTGGAAAGGACGAAACACCGGGCATGGAACTCGTGGTTACGTTTAAGAGCTATGCTGGAAACAGCATA
RNF38_1548.62	CACACTTGGCATGGAACTCG	GTGGAAAGGACGAAACACCG	GTTTAAGAGCTATGCTGGAAACAGCATA	GTGGAAAGGACGAAACACCGCACACTTGGCATGGAACTCGGTTTAAGAGCTATGCTGGAAACAGCATA
RNF38_1548.60	AAGCCATTTGTCAACACACT	GTGGAAAGGACGAAACACCG	GTTTAAGAGCTATGCTGGAAACAGCATA	GTGGAAAGGACGAAACACCGAAGCCATTTGTCAACACACTGTTTAAGAGCTATGCTGGAAACAGCATA
RNF38_1548.53	ATGCCAAGTGTGTTGACAAA	GTGGAAAGGACGAAACACCG	GTTTAAGAGCTATGCTGGAAACAGCATA	GTGGAAAGGACGAAACACCGATGCCAAGTGTGTTGACAAAGTTTAAGAGCTATGCTGGAAACAGCATA
RNF38_1548.59	AAGCATCAGCTCGGCAAATT	GTGGAAAGGACGAAACACCG	GTTTAAGAGCTATGCTGGAAACAGCATA	GTGGAAAGGACGAAACACCGAAGCATCAGCTCGGCAAATTGTTTAAGAGCTATGCTGGAAACAGCATA
RNF38_1548.58	GAAGCATCAGCTCGGCAAAT	GTGGAAAGGACGAAACACCG	GTTTAAGAGCTATGCTGGAAACAGCATA	GTGGAAAGGACGAAACACCGGAAGCATCAGCTCGGCAAATGTTTAAGAGCTATGCTGGAAACAGCATA
RNF39_1263.39	GGCGACGTGTCCTCTGTGCG	GTGGAAAGGACGAAACACCG	GTTTAAGAGCTATGCTGGAAACAGCATA	GTGGAAAGGACGAAACACCGGGCGACGTGTCCTCTGTGCGGTTTAAGAGCTATGCTGGAAACAGCATA
RNF39_1263.41	TCTGTGCGGGGGCTCCTTCG	GTGGAAAGGACGAAACACCG	GTTTAAGAGCTATGCTGGAAACAGCATA	GTGGAAAGGACGAAACACCGTCTGTGCGGGGGCTCCTTCGGTTTAAGAGCTATGCTGGAAACAGCATA
RNF39_1263.43	CTTCGAGGACCCGGTGCTTC	GTGGAAAGGACGAAACACCG	GTTTAAGAGCTATGCTGGAAACAGCATA	GTGGAAAGGACGAAACACCGCTTCGAGGACCCGGTGCTTCGTTTAAGAGCTATGCTGGAAACAGCATA
RNF39_1263.267	TGCTCGCACGCCAGAAGCAC	GTGGAAAGGACGAAACACCG	GTTTAAGAGCTATGCTGGAAACAGCATA	GTGGAAAGGACGAAACACCGTGCTCGCACGCCAGAAGCACGTTTAAGAGCTATGCTGGAAACAGCATA
RNF39_1263.268	AGCGGCGGGCCAGACACGCG	GTGGAAAGGACGAAACACCG	GTTTAAGAGCTATGCTGGAAACAGCATA	GTGGAAAGGACGAAACACCGAGCGGCGGGCCAGACACGCGGTTTAAGAGCTATGCTGGAAACAGCATA
RNF39_1263.263	GAAGCCTCGGTGCCGGTCGC	GTGGAAAGGACGAAACACCG	GTTTAAGAGCTATGCTGGAAACAGCATA	GTGGAAAGGACGAAACACCGGAAGCCTCGGTGCCGGTCGCGTTTAAGAGCTATGCTGGAAACAGCATA
RNF39_1263.252	GGACACGGCAGGCCGCAGCA	GTGGAAAGGACGAAACACCG	GTTTAAGAGCTATGCTGGAAACAGCATA	GTGGAAAGGACGAAACACCGGGACACGGCAGGCCGCAGCAGTTTAAGAGCTATGCTGGAAACAGCATA
RNF39_1263.219	AGGCGGCGGTGTGCGGTCCC	GTGGAAAGGACGAAACACCG	GTTTAAGAGCTATGCTGGAAACAGCATA	GTGGAAAGGACGAAACACCGAGGCGGCGGTGTGCGGTCCCGTTTAAGAGCTATGCTGGAAACAGCATA
RNF39_1263.212	GGGCCAGTTGTACGCTGCGG	GTGGAAAGGACGAAACACCG	GTTTAAGAGCTATGCTGGAAACAGCATA	GTGGAAAGGACGAAACACCGGGGCCAGTTGTACGCTGCGGGTTTAAGAGCTATGCTGGAAACAGCATA
RNF39_1263.189	CGGCCGCGCCCACTGCATAG	GTGGAAAGGACGAAACACCG	GTTTAAGAGCTATGCTGGAAACAGCATA	GTGGAAAGGACGAAACACCGCGGCCGCGCCCACTGCATAGGTTTAAGAGCTATGCTGGAAACAGCATA
RNF40_3006.73	GAACCGGCGACTGCAGGACT	GTGGAAAGGACGAAACACCG	GTTTAAGAGCTATGCTGGAAACAGCATA	GTGGAAAGGACGAAACACCGGAACCGGCGACTGCAGGACTGTTTAAGAGCTATGCTGGAAACAGCATA
RNF40_3006.83	CAACAGTGGAGGACTTGCAG	GTGGAAAGGACGAAACACCG	GTTTAAGAGCTATGCTGGAAACAGCATA	GTGGAAAGGACGAAACACCGCAACAGTGGAGGACTTGCAGGTTTAAGAGCTATGCTGGAAACAGCATA
RNF40_3006.459	TACGGCTGTTGGCCAGTTCC	GTGGAAAGGACGAAACACCG	GTTTAAGAGCTATGCTGGAAACAGCATA	GTGGAAAGGACGAAACACCGTACGGCTGTTGGCCAGTTCCGTTTAAGAGCTATGCTGGAAACAGCATA
RNF40_3006.134	CACGCTGGCCCAGGTACGCA	GTGGAAAGGACGAAACACCG	GTTTAAGAGCTATGCTGGAAACAGCATA	GTGGAAAGGACGAAACACCGCACGCTGGCCCAGGTACGCAGTTTAAGAGCTATGCTGGAAACAGCATA
RNF40_3006.320	TCTTGCGGGTGTTACAGCAG	GTGGAAAGGACGAAACACCG	GTTTAAGAGCTATGCTGGAAACAGCATA	GTGGAAAGGACGAAACACCGTCTTGCGGGTGTTACAGCAGGTTTAAGAGCTATGCTGGAAACAGCATA
RNF40_3006.295	CTGCTGTAACACCCGCAAGA	GTGGAAAGGACGAAACACCG	GTTTAAGAGCTATGCTGGAAACAGCATA	GTGGAAAGGACGAAACACCGCTGCTGTAACACCCGCAAGAGTTTAAGAGCTATGCTGGAAACAGCATA
RNF40_3006.315	AAACGTGGAAGCACTTGGTA	GTGGAAAGGACGAAACACCG	GTTTAAGAGCTATGCTGGAAACAGCATA	GTGGAAAGGACGAAACACCGAAACGTGGAAGCACTTGGTAGTTTAAGAGCTATGCTGGAAACAGCATA
RNF40_3006.313	CGCACTCGAAGCAGAAAACG	GTGGAAAGGACGAAACACCG	GTTTAAGAGCTATGCTGGAAACAGCATA	GTGGAAAGGACGAAACACCGCGCACTCGAAGCAGAAAACGGTTTAAGAGCTATGCTGGAAACAGCATA
RNF40_3006.296	TTTTCTGCTTCGAGTGCGTG	GTGGAAAGGACGAAACACCG	GTTTAAGAGCTATGCTGGAAACAGCATA	GTGGAAAGGACGAAACACCGTTTTCTGCTTCGAGTGCGTGGTTTAAGAGCTATGCTGGAAACAGCATA
RNF40_3006.299	GTGCGTGCGGGGCCGCTATG	GTGGAAAGGACGAAACACCG	GTTTAAGAGCTATGCTGGAAACAGCATA	GTGGAAAGGACGAAACACCGGTGCGTGCGGGGCCGCTATGGTTTAAGAGCTATGCTGGAAACAGCATA
RNF40_3006.300	GCCGCTATGAGGCCCGCCAG	GTGGAAAGGACGAAACACCG	GTTTAAGAGCTATGCTGGAAACAGCATA	GTGGAAAGGACGAAACACCGGCCGCTATGAGGCCCGCCAGGTTTAAGAGCTATGCTGGAAACAGCATA
RNF40_3006.307	CCAAAGGCCGCGTTGCACTT	GTGGAAAGGACGAAACACCG	GTTTAAGAGCTATGCTGGAAACAGCATA	GTGGAAAGGACGAAACACCGCCAAAGGCCGCGTTGCACTTGTTTAAGAGCTATGCTGGAAACAGCATA
RNF41_954.4	CTTATCTGCCCTATTTGCAG	GTGGAAAGGACGAAACACCG	GTTTAAGAGCTATGCTGGAAACAGCATA	GTGGAAAGGACGAAACACCGCTTATCTGCCCTATTTGCAGGTTTAAGAGCTATGCTGGAAACAGCATA
RNF41_954.116	CCAAGACTCCACTGCAAATA	GTGGAAAGGACGAAACACCG	GTTTAAGAGCTATGCTGGAAACAGCATA	GTGGAAAGGACGAAACACCGCCAAGACTCCACTGCAAATAGTTTAAGAGCTATGCTGGAAACAGCATA
RNF41_954.6	TATTTGCAGTGGAGTCTTGG	GTGGAAAGGACGAAACACCG	GTTTAAGAGCTATGCTGGAAACAGCATA	GTGGAAAGGACGAAACACCGTATTTGCAGTGGAGTCTTGGGTTTAAGAGCTATGCTGGAAACAGCATA
RNF41_954.113	CAGAAAGCATGTTCACAATG	GTGGAAAGGACGAAACACCG	GTTTAAGAGCTATGCTGGAAACAGCATA	GTGGAAAGGACGAAACACCGCAGAAAGCATGTTCACAATGGTTTAAGAGCTATGCTGGAAACAGCATA
RNF41_954.8	GCAACGCCTGCATCACCCAG	GTGGAAAGGACGAAACACCG	GTTTAAGAGCTATGCTGGAAACAGCATA	GTGGAAAGGACGAAACACCGGCAACGCCTGCATCACCCAGGTTTAAGAGCTATGCTGGAAACAGCATA
RNF41_954.111	CTGTTGCTGAGAGAACCACT	GTGGAAAGGACGAAACACCG	GTTTAAGAGCTATGCTGGAAACAGCATA	GTGGAAAGGACGAAACACCGCTGTTGCTGAGAGAACCACTGTTTAAGAGCTATGCTGGAAACAGCATA
RNF41_954.9	TCAGCAACAGACATGTCCAG	GTGGAAAGGACGAAACACCG	GTTTAAGAGCTATGCTGGAAACAGCATA	GTGGAAAGGACGAAACACCGTCAGCAACAGACATGTCCAGGTTTAAGAGCTATGCTGGAAACAGCATA
RNF41_954.24	GCGAGACATCCAGCTGCTAA	GTGGAAAGGACGAAACACCG	GTTTAAGAGCTATGCTGGAAACAGCATA	GTGGAAAGGACGAAACACCGGCGAGACATCCAGCTGCTAAGTTTAAGAGCTATGCTGGAAACAGCATA
RNF41_954.35	GGCTGTAATCAAGCGCTCCC	GTGGAAAGGACGAAACACCG	GTTTAAGAGCTATGCTGGAAACAGCATA	GTGGAAAGGACGAAACACCGGGCTGTAATCAAGCGCTCCCGTTTAAGAGCTATGCTGGAAACAGCATA
RNF43_2352.70	CTGTCTGGAGGAGTTCTCTG	GTGGAAAGGACGAAACACCG	GTTTAAGAGCTATGCTGGAAACAGCATA	GTGGAAAGGACGAAACACCGCTGTCTGGAGGAGTTCTCTGGTTTAAGAGCTATGCTGGAAACAGCATA
RNF43_2352.472	CTCCAGATTGTCGTCATCAC	GTGGAAAGGACGAAACACCG	GTTTAAGAGCTATGCTGGAAACAGCATA	GTGGAAAGGACGAAACACCGCTCCAGATTGTCGTCATCACGTTTAAGAGCTATGCTGGAAACAGCATA
RNF43_2352.29	GCTCGGATGGCGGGTGAGCG	GTGGAAAGGACGAAACACCG	GTTTAAGAGCTATGCTGGAAACAGCATA	GTGGAAAGGACGAAACACCGGCTCGGATGGCGGGTGAGCGGTTTAAGAGCTATGCTGGAAACAGCATA
RNF43_2352.446	TGGTGCCCACCACTGTCATT	GTGGAAAGGACGAAACACCG	GTTTAAGAGCTATGCTGGAAACAGCATA	GTGGAAAGGACGAAACACCGTGGTGCCCACCACTGTCATTGTTTAAGAGCTATGCTGGAAACAGCATA
RNF43_2352.68	CCCTGTGTGTGCCATCTGTC	GTGGAAAGGACGAAACACCG	GTTTAAGAGCTATGCTGGAAACAGCATA	GTGGAAAGGACGAAACACCGCCCTGTGTGTGCCATCTGTCGTTTAAGAGCTATGCTGGAAACAGCATA
RNF43_2352.420	ACGATGGAACTCATGGAGGC	GTGGAAAGGACGAAACACCG	GTTTAAGAGCTATGCTGGAAACAGCATA	GTGGAAAGGACGAAACACCGACGATGGAACTCATGGAGGCGTTTAAGAGCTATGCTGGAAACAGCATA
RNF43_2352.419	AGTTACGATGGAACTCATGG	GTGGAAAGGACGAAACACCG	GTTTAAGAGCTATGCTGGAAACAGCATA	GTGGAAAGGACGAAACACCGAGTTACGATGGAACTCATGGGTTTAAGAGCTATGCTGGAAACAGCATA
RNF43_2352.76	TGAGTTCCATCGTAACTGTG	GTGGAAAGGACGAAACACCG	GTTTAAGAGCTATGCTGGAAACAGCATA	GTGGAAAGGACGAAACACCGTGAGTTCCATCGTAACTGTGGTTTAAGAGCTATGCTGGAAACAGCATA
RNF43_2352.416	TCCGATGCTGATGTAACCAG	GTGGAAAGGACGAAACACCG	GTTTAAGAGCTATGCTGGAAACAGCATA	GTGGAAAGGACGAAACACCGTCCGATGCTGATGTAACCAGGTTTAAGAGCTATGCTGGAAACAGCATA
RNF43_2352.415	GTCCGATGCTGATGTAACCA	GTGGAAAGGACGAAACACCG	GTTTAAGAGCTATGCTGGAAACAGCATA	GTGGAAAGGACGAAACACCGGTCCGATGCTGATGTAACCAGTTTAAGAGCTATGCTGGAAACAGCATA
RNF43_2352.78	ACCCCTGGTTACATCAGCAT	GTGGAAAGGACGAAACACCG	GTTTAAGAGCTATGCTGGAAACAGCATA	GTGGAAAGGACGAAACACCGACCCCTGGTTACATCAGCATGTTTAAGAGCTATGCTGGAAACAGCATA
RNF44_1299.73	GGTCTGCTTCAGTGACTTCG	GTGGAAAGGACGAAACACCG	GTTTAAGAGCTATGCTGGAAACAGCATA	GTGGAAAGGACGAAACACCGGGTCTGCTTCAGTGACTTCGGTTTAAGAGCTATGCTGGAAACAGCATA
RNF44_1299.74	GCTTCAGTGACTTCGAGGCG	GTGGAAAGGACGAAACACCG	GTTTAAGAGCTATGCTGGAAACAGCATA	GTGGAAAGGACGAAACACCGGCTTCAGTGACTTCGAGGCGGTTTAAGAGCTATGCTGGAAACAGCATA
RNF44_1299.98	GGAACTCATGGTTGCAGGGG	GTGGAAAGGACGAAACACCG	GTTTAAGAGCTATGCTGGAAACAGCATA	GTGGAAAGGACGAAACACCGGGAACTCATGGTTGCAGGGGGTTTAAGAGCTATGCTGGAAACAGCATA
RNF44_1299.95	GGTGTGGAACTCATGGTTGC	GTGGAAAGGACGAAACACCG	GTTTAAGAGCTATGCTGGAAACAGCATA	GTGGAAAGGACGAAACACCGGGTGTGGAACTCATGGTTGCGTTTAAGAGCTATGCTGGAAACAGCATA
RNF44_1299.93	ACTTGTCAACACACTTGGTG	GTGGAAAGGACGAAACACCG	GTTTAAGAGCTATGCTGGAAACAGCATA	GTGGAAAGGACGAAACACCGACTTGTCAACACACTTGGTGGTTTAAGAGCTATGCTGGAAACAGCATA
RNF44_1299.91	GCAGATGGGACACGTCCGGT	GTGGAAAGGACGAAACACCG	GTTTAAGAGCTATGCTGGAAACAGCATA	GTGGAAAGGACGAAACACCGGCAGATGGGACACGTCCGGTGTTTAAGAGCTATGCTGGAAACAGCATA
RNF44_1299.89	GAGGCGTCGGCCCGGCAGAT	GTGGAAAGGACGAAACACCG	GTTTAAGAGCTATGCTGGAAACAGCATA	GTGGAAAGGACGAAACACCGGAGGCGTCGGCCCGGCAGATGTTTAAGAGCTATGCTGGAAACAGCATA
RNF7_342.8	AGATGTTCTCCCTCAAGAAG	GTGGAAAGGACGAAACACCG	GTTTAAGAGCTATGCTGGAAACAGCATA	GTGGAAAGGACGAAACACCGAGATGTTCTCCCTCAAGAAGGTTTAAGAGCTATGCTGGAAACAGCATA
RNF7_342.43	CACCGCGTTCCACTTCTTGA	GTGGAAAGGACGAAACACCG	GTTTAAGAGCTATGCTGGAAACAGCATA	GTGGAAAGGACGAAACACCGCACCGCGTTCCACTTCTTGAGTTTAAGAGCTATGCTGGAAACAGCATA
RNF7_342.42	CCACCGCGTTCCACTTCTTG	GTGGAAAGGACGAAACACCG	GTTTAAGAGCTATGCTGGAAACAGCATA	GTGGAAAGGACGAAACACCGCCACCGCGTTCCACTTCTTGGTTTAAGAGCTATGCTGGAAACAGCATA
RNF7_342.10	CCTCAAGAAGTGGAACGCGG	GTGGAAAGGACGAAACACCG	GTTTAAGAGCTATGCTGGAAACAGCATA	GTGGAAAGGACGAAACACCGCCTCAAGAAGTGGAACGCGGGTTTAAGAGCTATGCTGGAAACAGCATA
RNF7_342.15	GCGATACGTGCGCCATCTGC	GTGGAAAGGACGAAACACCG	GTTTAAGAGCTATGCTGGAAACAGCATA	GTGGAAAGGACGAAACACCGGCGATACGTGCGCCATCTGCGTTTAAGAGCTATGCTGGAAACAGCATA
RNF8_1458.9	AGCTGGTGCCTGCGGCGGGT	GTGGAAAGGACGAAACACCG	GTTTAAGAGCTATGCTGGAAACAGCATA	GTGGAAAGGACGAAACACCGAGCTGGTGCCTGCGGCGGGTGTTTAAGAGCTATGCTGGAAACAGCATA
RNF8_1458.20	GTGACTGTAGGACGAGGATT	GTGGAAAGGACGAAACACCG	GTTTAAGAGCTATGCTGGAAACAGCATA	GTGGAAAGGACGAAACACCGGTGACTGTAGGACGAGGATTGTTTAAGAGCTATGCTGGAAACAGCATA
RNF8_1458.25	TGAGGGCCAATGGACAATTA	GTGGAAAGGACGAAACACCG	GTTTAAGAGCTATGCTGGAAACAGCATA	GTGGAAAGGACGAAACACCGTGAGGGCCAATGGACAATTAGTTTAAGAGCTATGCTGGAAACAGCATA
RNF8_1458.70	GCAACTAGAGAAGACTTTCC	GTGGAAAGGACGAAACACCG	GTTTAAGAGCTATGCTGGAAACAGCATA	GTGGAAAGGACGAAACACCGGCAACTAGAGAAGACTTTCCGTTTAAGAGCTATGCTGGAAACAGCATA
RNF8_1458.104	GAAACTGTGGGCACAGTTCA	GTGGAAAGGACGAAACACCG	GTTTAAGAGCTATGCTGGAAACAGCATA	GTGGAAAGGACGAAACACCGGAAACTGTGGGCACAGTTCAGTTTAAGAGCTATGCTGGAAACAGCATA
RNF8_1458.103	ACAGTAGGAGCAGAAACTGT	GTGGAAAGGACGAAACACCG	GTTTAAGAGCTATGCTGGAAACAGCATA	GTGGAAAGGACGAAACACCGACAGTAGGAGCAGAAACTGTGTTTAAGAGCTATGCTGGAAACAGCATA
RNF8_1458.88	GCTCCTACTGTATCAATGAA	GTGGAAAGGACGAAACACCG	GTTTAAGAGCTATGCTGGAAACAGCATA	GTGGAAAGGACGAAACACCGGCTCCTACTGTATCAATGAAGTTTAAGAGCTATGCTGGAAACAGCATA
RNF8_1458.90	AGATAGAATGCCCCATTTGT	GTGGAAAGGACGAAACACCG	GTTTAAGAGCTATGCTGGAAACAGCATA	GTGGAAAGGACGAAACACCGAGATAGAATGCCCCATTTGTGTTTAAGAGCTATGCTGGAAACAGCATA
RNF8_1458.91	AGAATGCCCCATTTGTCGGA	GTGGAAAGGACGAAACACCG	GTTTAAGAGCTATGCTGGAAACAGCATA	GTGGAAAGGACGAAACACCGAGAATGCCCCATTTGTCGGAGTTTAAGAGCTATGCTGGAAACAGCATA
RNF8_1458.98	CTTAATGTCCTTCCGACAAA	GTGGAAAGGACGAAACACCG	GTTTAAGAGCTATGCTGGAAACAGCATA	GTGGAAAGGACGAAACACCGCTTAATGTCCTTCCGACAAAGTTTAAGAGCTATGCTGGAAACAGCATA
RNFT2_1335.181	GTTGGCATAGGCGAAGGTGC	GTGGAAAGGACGAAACACCG	GTTTAAGAGCTATGCTGGAAACAGCATA	GTGGAAAGGACGAAACACCGGTTGGCATAGGCGAAGGTGCGTTTAAGAGCTATGCTGGAAACAGCATA
RNFT2_1335.77	GGATCCTGGCCTTTCTGGCG	GTGGAAAGGACGAAACACCG	GTTTAAGAGCTATGCTGGAAACAGCATA	GTGGAAAGGACGAAACACCGGGATCCTGGCCTTTCTGGCGGTTTAAGAGCTATGCTGGAAACAGCATA
RNFT2_1335.107	TGACATCTGCGCCATCTGTC	GTGGAAAGGACGAAACACCG	GTTTAAGAGCTATGCTGGAAACAGCATA	GTGGAAAGGACGAAACACCGTGACATCTGCGCCATCTGTCGTTTAAGAGCTATGCTGGAAACAGCATA
RNFT2_1335.134	TCGGAACTCGGCCTGACAGA	GTGGAAAGGACGAAACACCG	GTTTAAGAGCTATGCTGGAAACAGCATA	GTGGAAAGGACGAAACACCGTCGGAACTCGGCCTGACAGAGTTTAAGAGCTATGCTGGAAACAGCATA
RNFT2_1335.127	TGCGCTCACGGTCCAGCCAC	GTGGAAAGGACGAAACACCG	GTTTAAGAGCTATGCTGGAAACAGCATA	GTGGAAAGGACGAAACACCGTGCGCTCACGGTCCAGCCACGTTTAAGAGCTATGCTGGAAACAGCATA
RNFT2_1335.126	AGAGCGGGCAGGTGCGCTCA	GTGGAAAGGACGAAACACCG	GTTTAAGAGCTATGCTGGAAACAGCATA	GTGGAAAGGACGAAACACCGAGAGCGGGCAGGTGCGCTCAGTTTAAGAGCTATGCTGGAAACAGCATA
RNFT2_1335.125	GACCGAGCGGCAGAGCGGGC	GTGGAAAGGACGAAACACCG	GTTTAAGAGCTATGCTGGAAACAGCATA	GTGGAAAGGACGAAACACCGGACCGAGCGGCAGAGCGGGCGTTTAAGAGCTATGCTGGAAACAGCATA
RNFT2_1335.111	CACCTGCCCGCTCTGCCGCT	GTGGAAAGGACGAAACACCG	GTTTAAGAGCTATGCTGGAAACAGCATA	GTGGAAAGGACGAAACACCGCACCTGCCCGCTCTGCCGCTGTTTAAGAGCTATGCTGGAAACAGCATA
RNFT2_1335.123	ACGGCGACCGAGCGGCAGAG	GTGGAAAGGACGAAACACCG	GTTTAAGAGCTATGCTGGAAACAGCATA	GTGGAAAGGACGAAACACCGACGGCGACCGAGCGGCAGAGGTTTAAGAGCTATGCTGGAAACAGCATA
RNFT2_1335.112	GCTCTGCCGCTCGGTCGCCG	GTGGAAAGGACGAAACACCG	GTTTAAGAGCTATGCTGGAAACAGCATA	GTGGAAAGGACGAAACACCGGCTCTGCCGCTCGGTCGCCGGTTTAAGAGCTATGCTGGAAACAGCATA
RSPRY1_354.50	GCTTCTGCTCGCTAAGAACA	GTGGAAAGGACGAAACACCG	GTTTAAGAGCTATGCTGGAAACAGCATA	GTGGAAAGGACGAAACACCGGCTTCTGCTCGCTAAGAACAGTTTAAGAGCTATGCTGGAAACAGCATA
RSPRY1_1731.64	CTGGCGTCATGCAGATTGGC	GTGGAAAGGACGAAACACCG	GTTTAAGAGCTATGCTGGAAACAGCATA	GTGGAAAGGACGAAACACCGCTGGCGTCATGCAGATTGGCGTTTAAGAGCTATGCTGGAAACAGCATA
RSPRY1_1731.109	CATTGTACCAAATCAGCTGC	GTGGAAAGGACGAAACACCG	GTTTAAGAGCTATGCTGGAAACAGCATA	GTGGAAAGGACGAAACACCGCATTGTACCAAATCAGCTGCGTTTAAGAGCTATGCTGGAAACAGCATA
RSPRY1_1731.93	TGCTACCTCATCACAACAAA	GTGGAAAGGACGAAACACCG	GTTTAAGAGCTATGCTGGAAACAGCATA	GTGGAAAGGACGAAACACCGTGCTACCTCATCACAACAAAGTTTAAGAGCTATGCTGGAAACAGCATA
RSPRY1_1731.92	CTGCTACCTCATCACAACAA	GTGGAAAGGACGAAACACCG	GTTTAAGAGCTATGCTGGAAACAGCATA	GTGGAAAGGACGAAACACCGCTGCTACCTCATCACAACAAGTTTAAGAGCTATGCTGGAAACAGCATA
RSPRY1_1731.83	GACACACAATTGAAGCCATG	GTGGAAAGGACGAAACACCG	GTTTAAGAGCTATGCTGGAAACAGCATA	GTGGAAAGGACGAAACACCGGACACACAATTGAAGCCATGGTTTAAGAGCTATGCTGGAAACAGCATA
RSPRY1_1731.90	GCAAGGCACAATCCATGCAC	GTGGAAAGGACGAAACACCG	GTTTAAGAGCTATGCTGGAAACAGCATA	GTGGAAAGGACGAAACACCGGCAAGGCACAATCCATGCACGTTTAAGAGCTATGCTGGAAACAGCATA
RSPRY1_1731.85	CATGGATTGTGCCTTGCAGC	GTGGAAAGGACGAAACACCG	GTTTAAGAGCTATGCTGGAAACAGCATA	GTGGAAAGGACGAAACACCGCATGGATTGTGCCTTGCAGCGTTTAAGAGCTATGCTGGAAACAGCATA
RSPRY1_1731.88	TTCTTTACGACACAATGGGC	GTGGAAAGGACGAAACACCG	GTTTAAGAGCTATGCTGGAAACAGCATA	GTGGAAAGGACGAAACACCGTTCTTTACGACACAATGGGCGTTTAAGAGCTATGCTGGAAACAGCATA
SH3RF1_2667.442	TCAAGGCGCTCTAGACACAC	GTGGAAAGGACGAAACACCG	GTTTAAGAGCTATGCTGGAAACAGCATA	GTGGAAAGGACGAAACACCGTCAAGGCGCTCTAGACACACGTTTAAGAGCTATGCTGGAAACAGCATA
SH3RF1_2667.2	GCGCCTTGATGCTTCTGCGA	GTGGAAAGGACGAAACACCG	GTTTAAGAGCTATGCTGGAAACAGCATA	GTGGAAAGGACGAAACACCGGCGCCTTGATGCTTCTGCGAGTTTAAGAGCTATGCTGGAAACAGCATA
SH3RF1_2667.440	TTGCAAAACGTATGCTGGCA	GTGGAAAGGACGAAACACCG	GTTTAAGAGCTATGCTGGAAACAGCATA	GTGGAAAGGACGAAACACCGTTGCAAAACGTATGCTGGCAGTTTAAGAGCTATGCTGGAAACAGCATA
SH3RF1_2667.439	ATCGCTTGCAAAACGTATGC	GTGGAAAGGACGAAACACCG	GTTTAAGAGCTATGCTGGAAACAGCATA	GTGGAAAGGACGAAACACCGATCGCTTGCAAAACGTATGCGTTTAAGAGCTATGCTGGAAACAGCATA
SH3RF1_2667.3	GTTTTGCAAGCGATGTTTGC	GTGGAAAGGACGAAACACCG	GTTTAAGAGCTATGCTGGAAACAGCATA	GTGGAAAGGACGAAACACCGGTTTTGCAAGCGATGTTTGCGTTTAAGAGCTATGCTGGAAACAGCATA
SH3RF1_2667.5	TTTGCAAGCGATGTTTGCTG	GTGGAAAGGACGAAACACCG	GTTTAAGAGCTATGCTGGAAACAGCATA	GTGGAAAGGACGAAACACCGTTTGCAAGCGATGTTTGCTGGTTTAAGAGCTATGCTGGAAACAGCATA
SH3RF1_2667.7	AACTCAGATGTCCCGAGTGC	GTGGAAAGGACGAAACACCG	GTTTAAGAGCTATGCTGGAAACAGCATA	GTGGAAAGGACGAAACACCGAACTCAGATGTCCCGAGTGCGTTTAAGAGCTATGCTGGAAACAGCATA
SH3RF1_2667.418	TTGCTGAATTTAAGGTCTCC	GTGGAAAGGACGAAACACCG	GTTTAAGAGCTATGCTGGAAACAGCATA	GTGGAAAGGACGAAACACCGTTGCTGAATTTAAGGTCTCCGTTTAAGAGCTATGCTGGAAACAGCATA
SH3RF1_2667.48	TCTGACTGTGATCCGAAGAG	GTGGAAAGGACGAAACACCG	GTTTAAGAGCTATGCTGGAAACAGCATA	GTGGAAAGGACGAAACACCGTCTGACTGTGATCCGAAGAGGTTTAAGAGCTATGCTGGAAACAGCATA
SH3RF1_2667.86	TTTAGTGTTTGAGCGCTGCC	GTGGAAAGGACGAAACACCG	GTTTAAGAGCTATGCTGGAAACAGCATA	GTGGAAAGGACGAAACACCGTTTAGTGTTTGAGCGCTGCCGTTTAAGAGCTATGCTGGAAACAGCATA
SH3RF2_2190.414	TCGAGCTTCTCAAAGCACAC	GTGGAAAGGACGAAACACCG	GTTTAAGAGCTATGCTGGAAACAGCATA	GTGGAAAGGACGAAACACCGTCGAGCTTCTCAAAGCACACGTTTAAGAGCTATGCTGGAAACAGCATA
SH3RF2_2190.411	TGCAGAAGGTGTGCTGGCAA	GTGGAAAGGACGAAACACCG	GTTTAAGAGCTATGCTGGAAACAGCATA	GTGGAAAGGACGAAACACCGTGCAGAAGGTGTGCTGGCAAGTTTAAGAGCTATGCTGGAAACAGCATA
SH3RF2_2190.409	ATGGTTTGCAGAAGGTGTGC	GTGGAAAGGACGAAACACCG	GTTTAAGAGCTATGCTGGAAACAGCATA	GTGGAAAGGACGAAACACCGATGGTTTGCAGAAGGTGTGCGTTTAAGAGCTATGCTGGAAACAGCATA
SH3RF2_2190.1	TCTGCAAACCATGTCTACAG	GTGGAAAGGACGAAACACCG	GTTTAAGAGCTATGCTGGAAACAGCATA	GTGGAAAGGACGAAACACCGTCTGCAAACCATGTCTACAGGTTTAAGAGCTATGCTGGAAACAGCATA
SH3RF2_2190.406	GGGGCACCGCAGCTCTTTGT	GTGGAAAGGACGAAACACCG	GTTTAAGAGCTATGCTGGAAACAGCATA	GTGGAAAGGACGAAACACCGGGGGCACCGCAGCTCTTTGTGTTTAAGAGCTATGCTGGAAACAGCATA
SH3RF2_2190.404	ACACAGGCGTCCTGCATTCG	GTGGAAAGGACGAAACACCG	GTTTAAGAGCTATGCTGGAAACAGCATA	GTGGAAAGGACGAAACACCGACACAGGCGTCCTGCATTCGGTTTAAGAGCTATGCTGGAAACAGCATA
SH3RF2_2190.35	CGGTGACCTAAGGTTTAATA	GTGGAAAGGACGAAACACCG	GTTTAAGAGCTATGCTGGAAACAGCATA	GTGGAAAGGACGAAACACCGCGGTGACCTAAGGTTTAATAGTTTAAGAGCTATGCTGGAAACAGCATA
SH3RF2_2190.49	CTCTACAACTTCGACCTACG	GTGGAAAGGACGAAACACCG	GTTTAAGAGCTATGCTGGAAACAGCATA	GTGGAAAGGACGAAACACCGCTCTACAACTTCGACCTACGGTTTAAGAGCTATGCTGGAAACAGCATA
SH3RF2_2190.85	AGCCCATGGACCCGATGAGC	GTGGAAAGGACGAAACACCG	GTTTAAGAGCTATGCTGGAAACAGCATA	GTGGAAAGGACGAAACACCGAGCCCATGGACCCGATGAGCGTTTAAGAGCTATGCTGGAAACAGCATA
SH3RF3_2649.0	GTCCTGGCTGTGCGCATCCA	GTGGAAAGGACGAAACACCG	GTTTAAGAGCTATGCTGGAAACAGCATA	GTGGAAAGGACGAAACACCGGTCCTGGCTGTGCGCATCCAGTTTAAGAGCTATGCTGGAAACAGCATA
SH3RF3_2649.24	CTCCGTGTGTCTGGAGCGCC	GTGGAAAGGACGAAACACCG	GTTTAAGAGCTATGCTGGAAACAGCATA	GTGGAAAGGACGAAACACCGCTCCGTGTGTCTGGAGCGCCGTTTAAGAGCTATGCTGGAAACAGCATA
SH3RF3_2649.25	TCTGGAGCGCCTGGACACCA	GTGGAAAGGACGAAACACCG	GTTTAAGAGCTATGCTGGAAACAGCATA	GTGGAAAGGACGAAACACCGTCTGGAGCGCCTGGACACCAGTTTAAGAGCTATGCTGGAAACAGCATA
SH3RF3_2649.555	GCATGGCAGCACCTTGGCCG	GTGGAAAGGACGAAACACCG	GTTTAAGAGCTATGCTGGAAACAGCATA	GTGGAAAGGACGAAACACCGGCATGGCAGCACCTTGGCCGGTTTAAGAGCTATGCTGGAAACAGCATA
SH3RF3_2649.553	CGGCAGAAAGTGTGTTGGCA	GTGGAAAGGACGAAACACCG	GTTTAAGAGCTATGCTGGAAACAGCATA	GTGGAAAGGACGAAACACCGCGGCAGAAAGTGTGTTGGCAGTTTAAGAGCTATGCTGGAAACAGCATA
SH3RF3_2649.551	CGATGCTCTCCAGGCAGCGG	GTGGAAAGGACGAAACACCG	GTTTAAGAGCTATGCTGGAAACAGCATA	GTGGAAAGGACGAAACACCGCGATGCTCTCCAGGCAGCGGGTTTAAGAGCTATGCTGGAAACAGCATA
SH3RF3_2649.549	GCGAGCACACGATGCTCTCC	GTGGAAAGGACGAAACACCG	GTTTAAGAGCTATGCTGGAAACAGCATA	GTGGAAAGGACGAAACACCGGCGAGCACACGATGCTCTCCGTTTAAGAGCTATGCTGGAAACAGCATA
SH3RF3_2649.547	CCACCAGGATGCGGCACTCG	GTGGAAAGGACGAAACACCG	GTTTAAGAGCTATGCTGGAAACAGCATA	GTGGAAAGGACGAAACACCGCCACCAGGATGCGGCACTCGGTTTAAGAGCTATGCTGGAAACAGCATA
SH3RF3_2649.78	CATCATCGTCCTGCGGCGCA	GTGGAAAGGACGAAACACCG	GTTTAAGAGCTATGCTGGAAACAGCATA	GTGGAAAGGACGAAACACCGCATCATCGTCCTGCGGCGCAGTTTAAGAGCTATGCTGGAAACAGCATA
SH3RF3_2649.91	ACGAGATTCTGACGGTGCTC	GTGGAAAGGACGAAACACCG	GTTTAAGAGCTATGCTGGAAACAGCATA	GTGGAAAGGACGAAACACCGACGAGATTCTGACGGTGCTCGTTTAAGAGCTATGCTGGAAACAGCATA
SH3RF3_2649.132	GCCCCAGAAGAGTGACGAGC	GTGGAAAGGACGAAACACCG	GTTTAAGAGCTATGCTGGAAACAGCATA	GTGGAAAGGACGAAACACCGGCCCCAGAAGAGTGACGAGCGTTTAAGAGCTATGCTGGAAACAGCATA
SH3RF3_2649.230	TGAGGCGGAGATCGAGCTGA	GTGGAAAGGACGAAACACCG	GTTTAAGAGCTATGCTGGAAACAGCATA	GTGGAAAGGACGAAACACCGTGAGGCGGAGATCGAGCTGAGTTTAAGAGCTATGCTGGAAACAGCATA
SHPRH_5052.62	GATACGATGTTCAACGGAAC	GTGGAAAGGACGAAACACCG	GTTTAAGAGCTATGCTGGAAACAGCATA	GTGGAAAGGACGAAACACCGGATACGATGTTCAACGGAACGTTTAAGAGCTATGCTGGAAACAGCATA
SHPRH_5052.364	CACTTCAGGCATTGAACACG	GTGGAAAGGACGAAACACCG	GTTTAAGAGCTATGCTGGAAACAGCATA	GTGGAAAGGACGAAACACCGCACTTCAGGCATTGAACACGGTTTAAGAGCTATGCTGGAAACAGCATA
SHPRH_5052.350	TTCTGAACGCAGTACATCAT	GTGGAAAGGACGAAACACCG	GTTTAAGAGCTATGCTGGAAACAGCATA	GTGGAAAGGACGAAACACCGTTCTGAACGCAGTACATCATGTTTAAGAGCTATGCTGGAAACAGCATA
SHPRH_5052.115	AGTGGCACTCCAGTACAGAG	GTGGAAAGGACGAAACACCG	GTTTAAGAGCTATGCTGGAAACAGCATA	GTGGAAAGGACGAAACACCGAGTGGCACTCCAGTACAGAGGTTTAAGAGCTATGCTGGAAACAGCATA
SHPRH_5052.264	TGTCGAGCACAGATTGGGCA	GTGGAAAGGACGAAACACCG	GTTTAAGAGCTATGCTGGAAACAGCATA	GTGGAAAGGACGAAACACCGTGTCGAGCACAGATTGGGCAGTTTAAGAGCTATGCTGGAAACAGCATA
SHPRH_5052.262	CCTAGCTGTCGAGCACAGAT	GTGGAAAGGACGAAACACCG	GTTTAAGAGCTATGCTGGAAACAGCATA	GTGGAAAGGACGAAACACCGCCTAGCTGTCGAGCACAGATGTTTAAGAGCTATGCTGGAAACAGCATA
SHPRH_5052.196	CCAATCTGTGCTCGACAGCT	GTGGAAAGGACGAAACACCG	GTTTAAGAGCTATGCTGGAAACAGCATA	GTGGAAAGGACGAAACACCGCCAATCTGTGCTCGACAGCTGTTTAAGAGCTATGCTGGAAACAGCATA
SHPRH_5052.202	ATTATTGAACAATACAGCGT	GTGGAAAGGACGAAACACCG	GTTTAAGAGCTATGCTGGAAACAGCATA	GTGGAAAGGACGAAACACCGATTATTGAACAATACAGCGTGTTTAAGAGCTATGCTGGAAACAGCATA
SHPRH_5052.260	GCGGCAGATTGCACACTTAA	GTGGAAAGGACGAAACACCG	GTTTAAGAGCTATGCTGGAAACAGCATA	GTGGAAAGGACGAAACACCGGCGGCAGATTGCACACTTAAGTTTAAGAGCTATGCTGGAAACAGCATA
SHPRH_5052.259	CTTTGTGAGATGTGGTCTGG	GTGGAAAGGACGAAACACCG	GTTTAAGAGCTATGCTGGAAACAGCATA	GTGGAAAGGACGAAACACCGCTTTGTGAGATGTGGTCTGGGTTTAAGAGCTATGCTGGAAACAGCATA
SHPRH_5052.250	CGTTGAGAAAACGAGTGCTT	GTGGAAAGGACGAAACACCG	GTTTAAGAGCTATGCTGGAAACAGCATA	GTGGAAAGGACGAAACACCGCGTTGAGAAAACGAGTGCTTGTTTAAGAGCTATGCTGGAAACAGCATA
SIAH1_942.79	AACACATAGTCAAAGCAGAC	GTGGAAAGGACGAAACACCG	GTTTAAGAGCTATGCTGGAAACAGCATA	GTGGAAAGGACGAAACACCGAACACATAGTCAAAGCAGACGTTTAAGAGCTATGCTGGAAACAGCATA
SIAH1_942.76	GCCACTCTGACATTGAAGAA	GTGGAAAGGACGAAACACCG	GTTTAAGAGCTATGCTGGAAACAGCATA	GTGGAAAGGACGAAACACCGGCCACTCTGACATTGAAGAAGTTTAAGAGCTATGCTGGAAACAGCATA
SIAH1_942.12	CCCATTCTTCAATGTCAGAG	GTGGAAAGGACGAAACACCG	GTTTAAGAGCTATGCTGGAAACAGCATA	GTGGAAAGGACGAAACACCGCCCATTCTTCAATGTCAGAGGTTTAAGAGCTATGCTGGAAACAGCATA
SIAH1_942.75	GACAGTTGCTACAAACAAGA	GTGGAAAGGACGAAACACCG	GTTTAAGAGCTATGCTGGAAACAGCATA	GTGGAAAGGACGAAACACCGGACAGTTGCTACAAACAAGAGTTTAAGAGCTATGCTGGAAACAGCATA
SIAH1_942.73	GTTGGACAACATGTGAGCTT	GTGGAAAGGACGAAACACCG	GTTTAAGAGCTATGCTGGAAACAGCATA	GTGGAAAGGACGAAACACCGGTTGGACAACATGTGAGCTTGTTTAAGAGCTATGCTGGAAACAGCATA
SIAH1_942.13	TCACATGTTGTCCAACTTGC	GTGGAAAGGACGAAACACCG	GTTTAAGAGCTATGCTGGAAACAGCATA	GTGGAAAGGACGAAACACCGTCACATGTTGTCCAACTTGCGTTTAAGAGCTATGCTGGAAACAGCATA
SIAH1_942.29	CATTACAACCCTACAGGGAG	GTGGAAAGGACGAAACACCG	GTTTAAGAGCTATGCTGGAAACAGCATA	GTGGAAAGGACGAAACACCGCATTACAACCCTACAGGGAGGTTTAAGAGCTATGCTGGAAACAGCATA
SIAH1_942.30	GCTACAGACATTAATCTTCC	GTGGAAAGGACGAAACACCG	GTTTAAGAGCTATGCTGGAAACAGCATA	GTGGAAAGGACGAAACACCGGCTACAGACATTAATCTTCCGTTTAAGAGCTATGCTGGAAACAGCATA
SIAH2_975.113	CTCCGTATGGTGCAGGGTCA	GTGGAAAGGACGAAACACCG	GTTTAAGAGCTATGCTGGAAACAGCATA	GTGGAAAGGACGAAACACCGCTCCGTATGGTGCAGGGTCAGTTTAAGAGCTATGCTGGAAACAGCATA
SIAH2_975.109	CATGTTCTGGTTTCTCCGTA	GTGGAAAGGACGAAACACCG	GTTTAAGAGCTATGCTGGAAACAGCATA	GTGGAAAGGACGAAACACCGCATGTTCTGGTTTCTCCGTAGTTTAAGAGCTATGCTGGAAACAGCATA
SIAH2_975.41	TGGTGCTTCCTGCAAGTGGC	GTGGAAAGGACGAAACACCG	GTTTAAGAGCTATGCTGGAAACAGCATA	GTGGAAAGGACGAAACACCGTGGTGCTTCCTGCAAGTGGCGTTTAAGAGCTATGCTGGAAACAGCATA
SIAH2_975.97	CTTGTGGGCGTGCATGAGAT	GTGGAAAGGACGAAACACCG	GTTTAAGAGCTATGCTGGAAACAGCATA	GTGGAAAGGACGAAACACCGCTTGTGGGCGTGCATGAGATGTTTAAGAGCTATGCTGGAAACAGCATA
SIAH2_975.50	ACTTGCCAGGGGCTGTCGAC	GTGGAAAGGACGAAACACCG	GTTTAAGAGCTATGCTGGAAACAGCATA	GTGGAAAGGACGAAACACCGACTTGCCAGGGGCTGTCGACGTTTAAGAGCTATGCTGGAAACAGCATA
SIAH2_975.85	GCTTGCGGGTGCCAATGAGC	GTGGAAAGGACGAAACACCG	GTTTAAGAGCTATGCTGGAAACAGCATA	GTGGAAAGGACGAAACACCGGCTTGCGGGTGCCAATGAGCGTTTAAGAGCTATGCTGGAAACAGCATA
SIAH2_975.135	GGCACTGCAGAATAGGAGGC	GTGGAAAGGACGAAACACCG	GTTTAAGAGCTATGCTGGAAACAGCATA	GTGGAAAGGACGAAACACCGGGCACTGCAGAATAGGAGGCGTTTAAGAGCTATGCTGGAAACAGCATA
SIAH2_975.24	CCTATTCTGCAGTGCCAGGC	GTGGAAAGGACGAAACACCG	GTTTAAGAGCTATGCTGGAAACAGCATA	GTGGAAAGGACGAAACACCGCCTATTCTGCAGTGCCAGGCGTTTAAGAGCTATGCTGGAAACAGCATA
SIAH2_975.132	TACACACCAGGTGCCCGGCC	GTGGAAAGGACGAAACACCG	GTTTAAGAGCTATGCTGGAAACAGCATA	GTGGAAAGGACGAAACACCGTACACACCAGGTGCCCGGCCGTTTAAGAGCTATGCTGGAAACAGCATA
SIAH2_975.130	GGCGGCATTGGTTACACACC	GTGGAAAGGACGAAACACCG	GTTTAAGAGCTATGCTGGAAACAGCATA	GTGGAAAGGACGAAACACCGGGCGGCATTGGTTACACACCGTTTAAGAGCTATGCTGGAAACAGCATA
SIAH2_975.129	AGCTCAACTTCTGGCGGCAT	GTGGAAAGGACGAAACACCG	GTTTAAGAGCTATGCTGGAAACAGCATA	GTGGAAAGGACGAAACACCGAGCTCAACTTCTGGCGGCATGTTTAAGAGCTATGCTGGAAACAGCATA
SIAH2_975.27	TGAGCTGCTGCCCGACGTGC	GTGGAAAGGACGAAACACCG	GTTTAAGAGCTATGCTGGAAACAGCATA	GTGGAAAGGACGAAACACCGTGAGCTGCTGCCCGACGTGCGTTTAAGAGCTATGCTGGAAACAGCATA
SYVN1_1854.8	ACACCAGTTCTACCCCACTG	GTGGAAAGGACGAAACACCG	GTTTAAGAGCTATGCTGGAAACAGCATA	GTGGAAAGGACGAAACACCGACACCAGTTCTACCCCACTGGTTTAAGAGCTATGCTGGAAACAGCATA
SYVN1_1854.350	TGAAGAGTGCAACAAAGCGG	GTGGAAAGGACGAAACACCG	GTTTAAGAGCTATGCTGGAAACAGCATA	GTGGAAAGGACGAAACACCGTGAAGAGTGCAACAAAGCGGGTTTAAGAGCTATGCTGGAAACAGCATA
SYVN1_1854.335	GATAGGCGTGGCTGACGAAG	GTGGAAAGGACGAAACACCG	GTTTAAGAGCTATGCTGGAAACAGCATA	GTGGAAAGGACGAAACACCGGATAGGCGTGGCTGACGAAGGTTTAAGAGCTATGCTGGAAACAGCATA
SYVN1_1854.42	CAAGTATGTGCTGCACTCCG	GTGGAAAGGACGAAACACCG	GTTTAAGAGCTATGCTGGAAACAGCATA	GTGGAAAGGACGAAACACCGCAAGTATGTGCTGCACTCCGGTTTAAGAGCTATGCTGGAAACAGCATA
SYVN1_1854.55	CATCATCTGCCGAGAAGAGA	GTGGAAAGGACGAAACACCG	GTTTAAGAGCTATGCTGGAAACAGCATA	GTGGAAAGGACGAAACACCGCATCATCTGCCGAGAAGAGAGTTTAAGAGCTATGCTGGAAACAGCATA
SYVN1_1854.56	TGCCGAGAAGAGATGGTGAC	GTGGAAAGGACGAAACACCG	GTTTAAGAGCTATGCTGGAAACAGCATA	GTGGAAAGGACGAAACACCGTGCCGAGAAGAGATGGTGACGTTTAAGAGCTATGCTGGAAACAGCATA
SYVN1_1854.294	GTATGGAAAATGTGGTTGCA	GTGGAAAGGACGAAACACCG	GTTTAAGAGCTATGCTGGAAACAGCATA	GTGGAAAGGACGAAACACCGGTATGGAAAATGTGGTTGCAGTTTAAGAGCTATGCTGGAAACAGCATA
SYVN1_1854.288	GGTCTGCTGCCGCTGGAACC	GTGGAAAGGACGAAACACCG	GTTTAAGAGCTATGCTGGAAACAGCATA	GTGGAAAGGACGAAACACCGGGTCTGCTGCCGCTGGAACCGTTTAAGAGCTATGCTGGAAACAGCATA
SYVN1_1854.59	GACCTGCCCCACCTGCCGTA	GTGGAAAGGACGAAACACCG	GTTTAAGAGCTATGCTGGAAACAGCATA	GTGGAAAGGACGAAACACCGGACCTGCCCCACCTGCCGTAGTTTAAGAGCTATGCTGGAAACAGCATA
SYVN1_1854.284	AGGACATCCATACGGCAGGT	GTGGAAAGGACGAAACACCG	GTTTAAGAGCTATGCTGGAAACAGCATA	GTGGAAAGGACGAAACACCGAGGACATCCATACGGCAGGTGTTTAAGAGCTATGCTGGAAACAGCATA
SYVN1_1854.282	ACGAAGGACATCCATACGGC	GTGGAAAGGACGAAACACCG	GTTTAAGAGCTATGCTGGAAACAGCATA	GTGGAAAGGACGAAACACCGACGAAGGACATCCATACGGCGTTTAAGAGCTATGCTGGAAACAGCATA
TMEM129_1089.1	CACGCCCAACGAGTTCCACG	GTGGAAAGGACGAAACACCG	GTTTAAGAGCTATGCTGGAAACAGCATA	GTGGAAAGGACGAAACACCGCACGCCCAACGAGTTCCACGGTTTAAGAGCTATGCTGGAAACAGCATA
TMEM129_1089.9	GAACCTGCTGTCGGGCTGGC	GTGGAAAGGACGAAACACCG	GTTTAAGAGCTATGCTGGAAACAGCATA	GTGGAAAGGACGAAACACCGGAACCTGCTGTCGGGCTGGCGTTTAAGAGCTATGCTGGAAACAGCATA
TMEM129_1089.12	GCCCTTCCACTTGCGCCGCA	GTGGAAAGGACGAAACACCG	GTTTAAGAGCTATGCTGGAAACAGCATA	GTGGAAAGGACGAAACACCGGCCCTTCCACTTGCGCCGCAGTTTAAGAGCTATGCTGGAAACAGCATA
TMEM129_1089.190	CAGCGAGTGGCACAACAGCG	GTGGAAAGGACGAAACACCG	GTTTAAGAGCTATGCTGGAAACAGCATA	GTGGAAAGGACGAAACACCGCAGCGAGTGGCACAACAGCGGTTTAAGAGCTATGCTGGAAACAGCATA
TMEM129_1089.172	GATCAGGATGCAGGCGATGG	GTGGAAAGGACGAAACACCG	GTTTAAGAGCTATGCTGGAAACAGCATA	GTGGAAAGGACGAAACACCGGATCAGGATGCAGGCGATGGGTTTAAGAGCTATGCTGGAAACAGCATA
TMEM129_1089.29	CTCTACGCCCTCCCACAGTC	GTGGAAAGGACGAAACACCG	GTTTAAGAGCTATGCTGGAAACAGCATA	GTGGAAAGGACGAAACACCGCTCTACGCCCTCCCACAGTCGTTTAAGAGCTATGCTGGAAACAGCATA
TMEM129_1089.115	GGCCGGGTTGACCTCTACCA	GTGGAAAGGACGAAACACCG	GTTTAAGAGCTATGCTGGAAACAGCATA	GTGGAAAGGACGAAACACCGGGCCGGGTTGACCTCTACCAGTTTAAGAGCTATGCTGGAAACAGCATA
TOPORS_2943.223	TCAAATCTATCCAAGCATAT	GTGGAAAGGACGAAACACCG	GTTTAAGAGCTATGCTGGAAACAGCATA	GTGGAAAGGACGAAACACCGTCAAATCTATCCAAGCATATGTTTAAGAGCTATGCTGGAAACAGCATA
TOPORS_2943.4	GTTCTGTTTTCGCTGTGTAC	GTGGAAAGGACGAAACACCG	GTTTAAGAGCTATGCTGGAAACAGCATA	GTGGAAAGGACGAAACACCGGTTCTGTTTTCGCTGTGTACGTTTAAGAGCTATGCTGGAAACAGCATA
TOPORS_2943.5	GTTTTCGCTGTGTACAGGAG	GTGGAAAGGACGAAACACCG	GTTTAAGAGCTATGCTGGAAACAGCATA	GTGGAAAGGACGAAACACCGGTTTTCGCTGTGTACAGGAGGTTTAAGAGCTATGCTGGAAACAGCATA
TOPORS_2943.221	TCAAAGGGCTGTTTACATAG	GTGGAAAGGACGAAACACCG	GTTTAAGAGCTATGCTGGAAACAGCATA	GTGGAAAGGACGAAACACCGTCAAAGGGCTGTTTACATAGGTTTAAGAGCTATGCTGGAAACAGCATA
TRAF2_1506.255	CGTTTCTGCAGGCGGAGCAC	GTGGAAAGGACGAAACACCG	GTTTAAGAGCTATGCTGGAAACAGCATA	GTGGAAAGGACGAAACACCGCGTTTCTGCAGGCGGAGCACGTTTAAGAGCTATGCTGGAAACAGCATA
TRAF2_1506.254	GCGGAGGACGTTTCTGCAGG	GTGGAAAGGACGAAACACCG	GTTTAAGAGCTATGCTGGAAACAGCATA	GTGGAAAGGACGAAACACCGGCGGAGGACGTTTCTGCAGGGTTTAAGAGCTATGCTGGAAACAGCATA
TRAF2_1506.253	CCTGCGGAGGACGTTTCTGC	GTGGAAAGGACGAAACACCG	GTTTAAGAGCTATGCTGGAAACAGCATA	GTGGAAAGGACGAAACACCGCCTGCGGAGGACGTTTCTGCGTTTAAGAGCTATGCTGGAAACAGCATA
TRAF2_1506.7	CCTGCAGAAACGTCCTCCGC	GTGGAAAGGACGAAACACCG	GTTTAAGAGCTATGCTGGAAACAGCATA	GTGGAAAGGACGAAACACCGCCTGCAGAAACGTCCTCCGCGTTTAAGAGCTATGCTGGAAACAGCATA
TRAF2_1506.250	TGGCCACACTGCGCCTGGAA	GTGGAAAGGACGAAACACCG	GTTTAAGAGCTATGCTGGAAACAGCATA	GTGGAAAGGACGAAACACCGTGGCCACACTGCGCCTGGAAGTTTAAGAGCTATGCTGGAAACAGCATA
TRAF2_1506.10	TCCAGGCGCAGTGTGGCCAC	GTGGAAAGGACGAAACACCG	GTTTAAGAGCTATGCTGGAAACAGCATA	GTGGAAAGGACGAAACACCGTCCAGGCGCAGTGTGGCCACGTTTAAGAGCTATGCTGGAAACAGCATA
TRAF2_1506.203	CGCAGCCGTCACAAGTTAAG	GTGGAAAGGACGAAACACCG	GTTTAAGAGCTATGCTGGAAACAGCATA	GTGGAAAGGACGAAACACCGCGCAGCCGTCACAAGTTAAGGTTTAAGAGCTATGCTGGAAACAGCATA
TRAF2_1506.44	CGGCAAGAAGAAGATCCCCC	GTGGAAAGGACGAAACACCG	GTTTAAGAGCTATGCTGGAAACAGCATA	GTGGAAAGGACGAAACACCGCGGCAAGAAGAAGATCCCCCGTTTAAGAGCTATGCTGGAAACAGCATA
TRAF2_1506.58	CATGCTACTGAGCTCGGTGC	GTGGAAAGGACGAAACACCG	GTTTAAGAGCTATGCTGGAAACAGCATA	GTGGAAAGGACGAAACACCGCATGCTACTGAGCTCGGTGCGTTTAAGAGCTATGCTGGAAACAGCATA
TRAF2_1506.70	TGTCTGCGTCCTGAACCGGG	GTGGAAAGGACGAAACACCG	GTTTAAGAGCTATGCTGGAAACAGCATA	GTGGAAAGGACGAAACACCGTGTCTGCGTCCTGAACCGGGGTTTAAGAGCTATGCTGGAAACAGCATA
TRAF2_1506.168	GATGAAGACCCCATCGTAGG	GTGGAAAGGACGAAACACCG	GTTTAAGAGCTATGCTGGAAACAGCATA	GTGGAAAGGACGAAACACCGGATGAAGACCCCATCGTAGGGTTTAAGAGCTATGCTGGAAACAGCATA
TRAF2_1506.143	ATTCTGGTCGAGCAGCATTA	GTGGAAAGGACGAAACACCG	GTTTAAGAGCTATGCTGGAAACAGCATA	GTGGAAAGGACGAAACACCGATTCTGGTCGAGCAGCATTAGTTTAAGAGCTATGCTGGAAACAGCATA
TRAF3_1707.190	TCGGGCTGCACAGCACCAGG	GTGGAAAGGACGAAACACCG	GTTTAAGAGCTATGCTGGAAACAGCATA	GTGGAAAGGACGAAACACCGTCGGGCTGCACAGCACCAGGGTTTAAGAGCTATGCTGGAAACAGCATA
TRAF3_1707.189	GCTTCGGGCTGCACAGCACC	GTGGAAAGGACGAAACACCG	GTTTAAGAGCTATGCTGGAAACAGCATA	GTGGAAAGGACGAAACACCGGCTTCGGGCTGCACAGCACCGTTTAAGAGCTATGCTGGAAACAGCATA
TRAF3_1707.188	GCCCACACTCGGTCTGCTTC	GTGGAAAGGACGAAACACCG	GTTTAAGAGCTATGCTGGAAACAGCATA	GTGGAAAGGACGAAACACCGGCCCACACTCGGTCTGCTTCGTTTAAGAGCTATGCTGGAAACAGCATA
TRAF3_1707.9	AGCCCGAAGCAGACCGAGTG	GTGGAAAGGACGAAACACCG	GTTTAAGAGCTATGCTGGAAACAGCATA	GTGGAAAGGACGAAACACCGAGCCCGAAGCAGACCGAGTGGTTTAAGAGCTATGCTGGAAACAGCATA
TRAF3_1707.185	CCATGCAGCTCTCGCAGAAG	GTGGAAAGGACGAAACACCG	GTTTAAGAGCTATGCTGGAAACAGCATA	GTGGAAAGGACGAAACACCGCCATGCAGCTCTCGCAGAAGGTTTAAGAGCTATGCTGGAAACAGCATA
TRAF3_1707.11	CCGCTTCTGCGAGAGCTGCA	GTGGAAAGGACGAAACACCG	GTTTAAGAGCTATGCTGGAAACAGCATA	GTGGAAAGGACGAAACACCGCCGCTTCTGCGAGAGCTGCAGTTTAAGAGCTATGCTGGAAACAGCATA
TRAF3_1707.182	TCTTGACACGCTGTACATTT	GTGGAAAGGACGAAACACCG	GTTTAAGAGCTATGCTGGAAACAGCATA	GTGGAAAGGACGAAACACCGTCTTGACACGCTGTACATTTGTTTAAGAGCTATGCTGGAAACAGCATA
TRAF3_1707.177	ATTTACACGCCTTCTCCACG	GTGGAAAGGACGAAACACCG	GTTTAAGAGCTATGCTGGAAACAGCATA	GTGGAAAGGACGAAACACCGATTTACACGCCTTCTCCACGGTTTAAGAGCTATGCTGGAAACAGCATA
TRAF3_1707.170	AGGGCAGGACACCACCACGC	GTGGAAAGGACGAAACACCG	GTTTAAGAGCTATGCTGGAAACAGCATA	GTGGAAAGGACGAAACACCGAGGGCAGGACACCACCACGCGTTTAAGAGCTATGCTGGAAACAGCATA
TRAF3_1707.45	TCCGGCCCTTCCGGCAGAAC	GTGGAAAGGACGAAACACCG	GTTTAAGAGCTATGCTGGAAACAGCATA	GTGGAAAGGACGAAACACCGTCCGGCCCTTCCGGCAGAACGTTTAAGAGCTATGCTGGAAACAGCATA
TRAF3_1707.134	GCAGGTCCATGTCGGCTAGG	GTGGAAAGGACGAAACACCG	GTTTAAGAGCTATGCTGGAAACAGCATA	GTGGAAAGGACGAAACACCGGCAGGTCCATGTCGGCTAGGGTTTAAGAGCTATGCTGGAAACAGCATA
TRAF3_1707.73	TTGGCTATAAGATGTGTGCC	GTGGAAAGGACGAAACACCG	GTTTAAGAGCTATGCTGGAAACAGCATA	GTGGAAAGGACGAAACACCGTTGGCTATAAGATGTGTGCCGTTTAAGAGCTATGCTGGAAACAGCATA
TRAF4_1413.232	GCATGGGCTTCCCGCACAGT	GTGGAAAGGACGAAACACCG	GTTTAAGAGCTATGCTGGAAACAGCATA	GTGGAAAGGACGAAACACCGGCATGGGCTTCCCGCACAGTGTTTAAGAGCTATGCTGGAAACAGCATA
TRAF4_1413.230	ACCTGCACAGGCTCGCGCAT	GTGGAAAGGACGAAACACCG	GTTTAAGAGCTATGCTGGAAACAGCATA	GTGGAAAGGACGAAACACCGACCTGCACAGGCTCGCGCATGTTTAAGAGCTATGCTGGAAACAGCATA
TRAF4_1413.229	AACCTGCACAGGCTCGCGCA	GTGGAAAGGACGAAACACCG	GTTTAAGAGCTATGCTGGAAACAGCATA	GTGGAAAGGACGAAACACCGAACCTGCACAGGCTCGCGCAGTTTAAGAGCTATGCTGGAAACAGCATA
TRAF4_1413.228	CCGCAGGTGGAAACCTGCAC	GTGGAAAGGACGAAACACCG	GTTTAAGAGCTATGCTGGAAACAGCATA	GTGGAAAGGACGAAACACCGCCGCAGGTGGAAACCTGCACGTTTAAGAGCTATGCTGGAAACAGCATA
TRAF4_1413.226	ATCGCAGAAACGGTGGCCGC	GTGGAAAGGACGAAACACCG	GTTTAAGAGCTATGCTGGAAACAGCATA	GTGGAAAGGACGAAACACCGATCGCAGAAACGGTGGCCGCGTTTAAGAGCTATGCTGGAAACAGCATA
TRAF4_1413.225	GGCAGGTATCGCAGAAACGG	GTGGAAAGGACGAAACACCG	GTTTAAGAGCTATGCTGGAAACAGCATA	GTGGAAAGGACGAAACACCGGGCAGGTATCGCAGAAACGGGTTTAAGAGCTATGCTGGAAACAGCATA
TRAF4_1413.6	TTTCTGCGATACCTGCCTGC	GTGGAAAGGACGAAACACCG	GTTTAAGAGCTATGCTGGAAACAGCATA	GTGGAAAGGACGAAACACCGTTTCTGCGATACCTGCCTGCGTTTAAGAGCTATGCTGGAAACAGCATA
TRAF4_1413.200	GCTTCATGGGGCAGCGATTA	GTGGAAAGGACGAAACACCG	GTTTAAGAGCTATGCTGGAAACAGCATA	GTGGAAAGGACGAAACACCGGCTTCATGGGGCAGCGATTAGTTTAAGAGCTATGCTGGAAACAGCATA
TRAF4_1413.37	GTTGCCTGCCCCAACCAATG	GTGGAAAGGACGAAACACCG	GTTTAAGAGCTATGCTGGAAACAGCATA	GTGGAAAGGACGAAACACCGGTTGCCTGCCCCAACCAATGGTTTAAGAGCTATGCTGGAAACAGCATA
TRAF4_1413.72	CTATGGACGGCGGCTACAGG	GTGGAAAGGACGAAACACCG	GTTTAAGAGCTATGCTGGAAACAGCATA	GTGGAAAGGACGAAACACCGCTATGGACGGCGGCTACAGGGTTTAAGAGCTATGCTGGAAACAGCATA
TRAF4_1413.127	GAAGGTGACACGGCGGGCAA	GTGGAAAGGACGAAACACCG	GTTTAAGAGCTATGCTGGAAACAGCATA	GTGGAAAGGACGAAACACCGGAAGGTGACACGGCGGGCAAGTTTAAGAGCTATGCTGGAAACAGCATA
TRAF5_1674.166	GTGAAGCACCGAGTGGCAGA	GTGGAAAGGACGAAACACCG	GTTTAAGAGCTATGCTGGAAACAGCATA	GTGGAAAGGACGAAACACCGGTGAAGCACCGAGTGGCAGAGTTTAAGAGCTATGCTGGAAACAGCATA
TRAF5_1674.165	GGGGGTTGTGAAGCACCGAG	GTGGAAAGGACGAAACACCG	GTTTAAGAGCTATGCTGGAAACAGCATA	GTGGAAAGGACGAAACACCGGGGGGTTGTGAAGCACCGAGGTTTAAGAGCTATGCTGGAAACAGCATA
TRAF5_1674.8	CTTCACAACCCCCACCAGAC	GTGGAAAGGACGAAACACCG	GTTTAAGAGCTATGCTGGAAACAGCATA	GTGGAAAGGACGAAACACCGCTTCACAACCCCCACCAGACGTTTAAGAGCTATGCTGGAAACAGCATA
TRAF5_1674.162	GTGCCCACATCCTGTCTGGT	GTGGAAAGGACGAAACACCG	GTTTAAGAGCTATGCTGGAAACAGCATA	GTGGAAAGGACGAAACACCGGTGCCCACATCCTGTCTGGTGTTTAAGAGCTATGCTGGAAACAGCATA
[truncated: 4,062 more rows]

## Sheet: Control sgRNA
Control sgRNA template sequences
neg1	GTGGAAAGGACGAAACACCGGTAGCGAACGTGTCCGGCGTGTTTAAGAGCTATGCTGGAAACAGCATA
neg2	GTGGAAAGGACGAAACACCGGACCGGAACGATCTCGCGTAGTTTAAGAGCTATGCTGGAAACAGCATA
neg3	GTGGAAAGGACGAAACACCGGGCAGTCGTTCGGTTGATATGTTTAAGAGCTATGCTGGAAACAGCATA
neg4	GTGGAAAGGACGAAACACCGGCTTGAGCACATACGCGAATGTTTAAGAGCTATGCTGGAAACAGCATA
neg5	GTGGAAAGGACGAAACACCGGTGGTAGAATAACGTATTACGTTTAAGAGCTATGCTGGAAACAGCATA
neg6	GTGGAAAGGACGAAACACCGGTCATACATGGATAAGGCTAGTTTAAGAGCTATGCTGGAAACAGCATA
neg7	GTGGAAAGGACGAAACACCGGATACACGAAGCATCACTAGGTTTAAGAGCTATGCTGGAAACAGCATA
neg8	GTGGAAAGGACGAAACACCGGAACGTTGGCACTACTTCACGTTTAAGAGCTATGCTGGAAACAGCATA
neg9	GTGGAAAGGACGAAACACCGGATCCATGTAATGCGTTCGAGTTTAAGAGCTATGCTGGAAACAGCATA
neg10	GTGGAAAGGACGAAACACCGGTCGTGAAGTGCATTCGATCGTTTAAGAGCTATGCTGGAAACAGCATA
neg11	GTGGAAAGGACGAAACACCGGTTCGACTCGCGTGACCGTAGTTTAAGAGCTATGCTGGAAACAGCATA
neg12	GTGGAAAGGACGAAACACCGGAATCTACCGCAGCGGTTCGGTTTAAGAGCTATGCTGGAAACAGCATA
neg13	GTGGAAAGGACGAAACACCGGAAGTGACGTCGATTCGATAGTTTAAGAGCTATGCTGGAAACAGCATA
neg14	GTGGAAAGGACGAAACACCGGCGGTGTATGACAACCGCCGGTTTAAGAGCTATGCTGGAAACAGCATA
neg15	GTGGAAAGGACGAAACACCGGTACCGCGCCTGAAGTTCGCGTTTAAGAGCTATGCTGGAAACAGCATA
neg16	GTGGAAAGGACGAAACACCGGCAGCTCGTGTGTCGTACTCGTTTAAGAGCTATGCTGGAAACAGCATA
neg17	GTGGAAAGGACGAAACACCGGCGCCTTAAGAGTACTCATCGTTTAAGAGCTATGCTGGAAACAGCATA
neg18	GTGGAAAGGACGAAACACCGGAGTGTCGTCGTTGCTCCTAGTTTAAGAGCTATGCTGGAAACAGCATA
neg19	GTGGAAAGGACGAAACACCGGCAGCTCGACCTCAAGCCGTGTTTAAGAGCTATGCTGGAAACAGCATA
neg20	GTGGAAAGGACGAAACACCGGTATCCTGACCTACGCGCTGGTTTAAGAGCTATGCTGGAAACAGCATA
neg21	GTGGAAAGGACGAAACACCGGTGTATCTCAGCACGCTAACGTTTAAGAGCTATGCTGGAAACAGCATA
neg22	GTGGAAAGGACGAAACACCGGTCGTCATACAACGGCAACGGTTTAAGAGCTATGCTGGAAACAGCATA
neg23	GTGGAAAGGACGAAACACCGGTCGTGCGCTTCCGGCGGTAGTTTAAGAGCTATGCTGGAAACAGCATA
neg24	GTGGAAAGGACGAAACACCGGCGGTCCTCAGTAAGCGCGTGTTTAAGAGCTATGCTGGAAACAGCATA
neg25	GTGGAAAGGACGAAACACCGGCTCTGCTGCGGAAGGATTCGTTTAAGAGCTATGCTGGAAACAGCATA
neg26	GTGGAAAGGACGAAACACCGGTCTTCCGCCGCTCAAGTTAGTTTAAGAGCTATGCTGGAAACAGCATA
neg27	GTGGAAAGGACGAAACACCGGCATGGAGGAGCGTCGCAGAGTTTAAGAGCTATGCTGGAAACAGCATA
neg28	GTGGAAAGGACGAAACACCGGTAGCGCGCGTAGGAGTGGCGTTTAAGAGCTATGCTGGAAACAGCATA
neg29	GTGGAAAGGACGAAACACCGGATCACCTGCATTCGTACACGTTTAAGAGCTATGCTGGAAACAGCATA
neg30	GTGGAAAGGACGAAACACCGGCACACCTAGATATCGAATGGTTTAAGAGCTATGCTGGAAACAGCATA
neg31	GTGGAAAGGACGAAACACCGGTTGATCAACGCGCTTCGCGGTTTAAGAGCTATGCTGGAAACAGCATA
neg32	GTGGAAAGGACGAAACACCGGCGTCTCACTCACTCCATCGGTTTAAGAGCTATGCTGGAAACAGCATA
neg33	GTGGAAAGGACGAAACACCGGCCGACCAACGTCAGCGGTAGTTTAAGAGCTATGCTGGAAACAGCATA
neg34	GTGGAAAGGACGAAACACCGGGATACGGTGCGTCAATCTAGTTTAAGAGCTATGCTGGAAACAGCATA
neg35	GTGGAAAGGACGAAACACCGGAATCCAGTGGCGGCGACAAGTTTAAGAGCTATGCTGGAAACAGCATA
neg36	GTGGAAAGGACGAAACACCGGCACTGTCAGTGCAACGATAGTTTAAGAGCTATGCTGGAAACAGCATA
neg37	GTGGAAAGGACGAAACACCGGCGATCCTCAAGTATGCTCAGTTTAAGAGCTATGCTGGAAACAGCATA
neg38	GTGGAAAGGACGAAACACCGGCTAATATCGACACGGCCGCGTTTAAGAGCTATGCTGGAAACAGCATA
neg39	GTGGAAAGGACGAAACACCGGGAGATGCATCGAAGTCGATGTTTAAGAGCTATGCTGGAAACAGCATA
neg40	GTGGAAAGGACGAAACACCGGGATGCACTCCATCTCGTCTGTTTAAGAGCTATGCTGGAAACAGCATA
neg41	GTGGAAAGGACGAAACACCGGTGCCGAGTAATAACGCGAGGTTTAAGAGCTATGCTGGAAACAGCATA
neg42	GTGGAAAGGACGAAACACCGGAGATTCCGATGTAACGTACGTTTAAGAGCTATGCTGGAAACAGCATA
neg43	GTGGAAAGGACGAAACACCGGTCGTCACGAGCAGGATTGCGTTTAAGAGCTATGCTGGAAACAGCATA
neg44	GTGGAAAGGACGAAACACCGGCGTTAGTCACTTAGCTCGAGTTTAAGAGCTATGCTGGAAACAGCATA
neg45	GTGGAAAGGACGAAACACCGGTTCACACGGTGTCGGATAGGTTTAAGAGCTATGCTGGAAACAGCATA
neg46	GTGGAAAGGACGAAACACCGGGATAGGTGACCTTAGTACGGTTTAAGAGCTATGCTGGAAACAGCATA
neg47	GTGGAAAGGACGAAACACCGGTATGAGTCAAGCTAATGCGGTTTAAGAGCTATGCTGGAAACAGCATA
neg48	GTGGAAAGGACGAAACACCGGCAACTATTGGAATACGTGAGTTTAAGAGCTATGCTGGAAACAGCATA
neg49	GTGGAAAGGACGAAACACCGGTTACCTTCGCTCGTCTATAGTTTAAGAGCTATGCTGGAAACAGCATA
neg50	GTGGAAAGGACGAAACACCGGTACCGAGCACCACAGGCCGGTTTAAGAGCTATGCTGGAAACAGCATA
neg51	GTGGAAAGGACGAAACACCGGTCAGCCATCGGATAGAGATGTTTAAGAGCTATGCTGGAAACAGCATA
neg52	GTGGAAAGGACGAAACACCGGTACGGCACTCCTAGCCGCTGTTTAAGAGCTATGCTGGAAACAGCATA
neg53	GTGGAAAGGACGAAACACCGGGTCCTGTCGTATGCTTGCAGTTTAAGAGCTATGCTGGAAACAGCATA
neg54	GTGGAAAGGACGAAACACCGGCCGCAATATATGCGGTAAGGTTTAAGAGCTATGCTGGAAACAGCATA
neg55	GTGGAAAGGACGAAACACCGGCGCACGTATAATCCTGCGTGTTTAAGAGCTATGCTGGAAACAGCATA
neg56	GTGGAAAGGACGAAACACCGGTGCACAACACGATCCACGAGTTTAAGAGCTATGCTGGAAACAGCATA
neg57	GTGGAAAGGACGAAACACCGGCACAATGTTGACGTAAGTGGTTTAAGAGCTATGCTGGAAACAGCATA
neg58	GTGGAAAGGACGAAACACCGGTAAGATGCTGCTCACCGTGGTTTAAGAGCTATGCTGGAAACAGCATA
neg59	GTGGAAAGGACGAAACACCGGTCGGTGATCCAACGTATCGGTTTAAGAGCTATGCTGGAAACAGCATA
neg60	GTGGAAAGGACGAAACACCGGAGCTAGTAGGACGCAAGACGTTTAAGAGCTATGCTGGAAACAGCATA
neg61	GTGGAAAGGACGAAACACCGGTACGTGGAAGCTTGTGGCCGTTTAAGAGCTATGCTGGAAACAGCATA
neg62	GTGGAAAGGACGAAACACCGGTCTTCCGGAAGCGTGTGTTGTTTAAGAGCTATGCTGGAAACAGCATA
neg63	GTGGAAAGGACGAAACACCGGAGAACTGCCAGTTCTCGATGTTTAAGAGCTATGCTGGAAACAGCATA
neg64	GTGGAAAGGACGAAACACCGGCCATTCGGCGCGGCACTTCGTTTAAGAGCTATGCTGGAAACAGCATA
neg65	GTGGAAAGGACGAAACACCGGCACACGACCAATCCGCTTCGTTTAAGAGCTATGCTGGAAACAGCATA
neg66	GTGGAAAGGACGAAACACCGGAGGTGATCGATTAAGTACAGTTTAAGAGCTATGCTGGAAACAGCATA
neg67	GTGGAAAGGACGAAACACCGGTCACTCGCAGACGCCTAACGTTTAAGAGCTATGCTGGAAACAGCATA
neg68	GTGGAAAGGACGAAACACCGGCGCTACGGAATCATACGTTGTTTAAGAGCTATGCTGGAAACAGCATA
neg69	GTGGAAAGGACGAAACACCGGGTAGGACCTCACGGCGCGCGTTTAAGAGCTATGCTGGAAACAGCATA
neg70	GTGGAAAGGACGAAACACCGGAACTGCATCTTGTTGTAGTGTTTAAGAGCTATGCTGGAAACAGCATA
neg71	GTGGAAAGGACGAAACACCGGATCCTGATCCGGCGGCGCGGTTTAAGAGCTATGCTGGAAACAGCATA
neg72	GTGGAAAGGACGAAACACCGGGTATGCGCGATCCTGAGTTGTTTAAGAGCTATGCTGGAAACAGCATA
neg73	GTGGAAAGGACGAAACACCGGCGGAGCTAGAGAGCGGTCAGTTTAAGAGCTATGCTGGAAACAGCATA
neg74	GTGGAAAGGACGAAACACCGGAATGGCAATTACGGCTGATGTTTAAGAGCTATGCTGGAAACAGCATA
neg75	GTGGAAAGGACGAAACACCGGTATGGTGAGTAGTCGCTTGGTTTAAGAGCTATGCTGGAAACAGCATA
neg76	GTGGAAAGGACGAAACACCGGTGTAATTGCGTCTAGTCGGGTTTAAGAGCTATGCTGGAAACAGCATA
neg77	GTGGAAAGGACGAAACACCGGGTCCTGGCGAGGAGCCTTGGTTTAAGAGCTATGCTGGAAACAGCATA
neg78	GTGGAAAGGACGAAACACCGGAAGATAAGTCGCTGTCTCGGTTTAAGAGCTATGCTGGAAACAGCATA
neg79	GTGGAAAGGACGAAACACCGGTAGCGAAGACTTGCCGACGGTTTAAGAGCTATGCTGGAAACAGCATA
neg80	GTGGAAAGGACGAAACACCGGTCGGCGTTCTGTTGTGACTGTTTAAGAGCTATGCTGGAAACAGCATA
neg81	GTGGAAAGGACGAAACACCGGAGGCAAGCCGTTAGGTGTAGTTTAAGAGCTATGCTGGAAACAGCATA
neg82	GTGGAAAGGACGAAACACCGGCGGATCCAGATCTCATTCGGTTTAAGAGCTATGCTGGAAACAGCATA
neg83	GTGGAAAGGACGAAACACCGGGAACATAGGAGCACGTAGTGTTTAAGAGCTATGCTGGAAACAGCATA
neg84	GTGGAAAGGACGAAACACCGGTCATCATTATGGCGTAAGGGTTTAAGAGCTATGCTGGAAACAGCATA
neg85	GTGGAAAGGACGAAACACCGGCGACTAGCGCCATGAGCGGGTTTAAGAGCTATGCTGGAAACAGCATA
neg86	GTGGAAAGGACGAAACACCGGGCGAAGTTCGACATGACACGTTTAAGAGCTATGCTGGAAACAGCATA
neg87	GTGGAAAGGACGAAACACCGGCTGTCGTGTGGAGGCTATGGTTTAAGAGCTATGCTGGAAACAGCATA
neg88	GTGGAAAGGACGAAACACCGGCGGAGAGCATTGACCTCATGTTTAAGAGCTATGCTGGAAACAGCATA
neg89	GTGGAAAGGACGAAACACCGGACTAATGGACCAAGTCAGTGTTTAAGAGCTATGCTGGAAACAGCATA
neg90	GTGGAAAGGACGAAACACCGGCGGATTAGAGGTAATGCGGGTTTAAGAGCTATGCTGGAAACAGCATA
neg91	GTGGAAAGGACGAAACACCGGCCGACGGCAATCAGTACGCGTTTAAGAGCTATGCTGGAAACAGCATA
neg92	GTGGAAAGGACGAAACACCGGTAACCTCTCGAGCGATAGAGTTTAAGAGCTATGCTGGAAACAGCATA
neg93	GTGGAAAGGACGAAACACCGGACTTGTATGTGGCTTACGGGTTTAAGAGCTATGCTGGAAACAGCATA
neg94	GTGGAAAGGACGAAACACCGGTCACTGTGGTCGAACATGTGTTTAAGAGCTATGCTGGAAACAGCATA
neg95	GTGGAAAGGACGAAACACCGGTACTCCAATCCGCGATGACGTTTAAGAGCTATGCTGGAAACAGCATA
neg96	GTGGAAAGGACGAAACACCGGCGTTGGCACGATGTTACGGGTTTAAGAGCTATGCTGGAAACAGCATA
neg97	GTGGAAAGGACGAAACACCGGAACCAGCCGGCTAGTATGAGTTTAAGAGCTATGCTGGAAACAGCATA
neg98	GTGGAAAGGACGAAACACCGGTATACTAGCTAACCACACGGTTTAAGAGCTATGCTGGAAACAGCATA
neg99	GTGGAAAGGACGAAACACCGGAATCGGAATAGTTGATTCGGTTTAAGAGCTATGCTGGAAACAGCATA
neg100	GTGGAAAGGACGAAACACCGGAGCACTTGCATGAGGCGGTGTTTAAGAGCTATGCTGGAAACAGCATA
PCNA_e2.1	GTGGAAAGGACGAAACACCGGGACTCGTCCCACGTCTCTTGTTTAAGAGCTATGCTGGAAACAGCATA
PCNA_e2.2	GTGGAAAGGACGAAACACCGCTACCGCTGCGACCGCAACCGTTTAAGAGCTATGCTGGAAACAGCATA
PCNA_e3.2	GTGGAAAGGACGAAACACCGCGAAGATAACGCGGATACCTGTTTAAGAGCTATGCTGGAAACAGCATA
POLR2A_e2.1	GTGGAAAGGACGAAACACCGAAGCGAATGTCTGTGACGGAGTTTAAGAGCTATGCTGGAAACAGCATA
POLR2A_e2.2	GTGGAAAGGACGAAACACCGCAGGGGGTGATTGAGCGGACGTTTAAGAGCTATGCTGGAAACAGCATA
POLR2A_e10.1	GTGGAAAGGACGAAACACCGGTACAATGCAGACTTTGACGGTTTAAGAGCTATGCTGGAAACAGCATA
POLR2A_e10.2	GTGGAAAGGACGAAACACCGTGGGGGGTGACAATCATGCGGTTTAAGAGCTATGCTGGAAACAGCATA
RPA3_e1.1	GTGGAAAGGACGAAACACCGCCGGCGTTGATGCGCGACCTGTTTAAGAGCTATGCTGGAAACAGCATA
RPA3_e1.2	GTGGAAAGGACGAAACACCGGCCGGCGTTGATGCGCGACCGTTTAAGAGCTATGCTGGAAACAGCATA
RPA3_e1.3	GTGGAAAGGACGAAACACCGGATGAATTGAGCTAGCATGCGTTTAAGAGCTATGCTGGAAACAGCATA
RPA3_e2.1	GTGGAAAGGACGAAACACCGAAATGGAACCATCGAGTTGAGTTTAAGAGCTATGCTGGAAACAGCATA
PRL9_e3.1	GTGGAAAGGACGAAACACCGGGACGCACAGTTATCGTGAAGTTTAAGAGCTATGCTGGAAACAGCATA
PRL9_e3.2	GTGGAAAGGACGAAACACCGAATGTAGAACTCAGCCTTCTGTTTAAGAGCTATGCTGGAAACAGCATA
PRL9_e4.1	GTGGAAAGGACGAAACACCGCTCCGGGTTGACAAATGGTGGTTTAAGAGCTATGCTGGAAACAGCATA
PRL9_e4.2	GTGGAAAGGACGAAACACCGGAAAGGAACTGGCTACCGTTGTTTAAGAGCTATGCTGGAAACAGCATA
RPL23A_e2.2	GTGGAAAGGACGAAACACCGGTCGCAGTGTCTTCGGCCGCGTTTAAGAGCTATGCTGGAAACAGCATA
RPL23A_e3.1	GTGGAAAGGACGAAACACCGGAAGCTGTATGACATTGATGGTTTAAGAGCTATGCTGGAAACAGCATA
CDK1_e5.1	GTGGAAAGGACGAAACACCGACACAATCCCCTGTAGGATTGTTTAAGAGCTATGCTGGAAACAGCATA
CDK1_e6.1	GTGGAAAGGACGAAACACCGACTCAACTCCAGTTGACATTGTTTAAGAGCTATGCTGGAAACAGCATA
CDK1_e7.1	GTGGAAAGGACGAAACACCGACATGGGATGCTAGGCTTCCGTTTAAGAGCTATGCTGGAAACAGCATA
CDK9_e2.1	GTGGAAAGGACGAAACACCGCTGGCCGGTCTTGCGGTGCCGTTTAAGAGCTATGCTGGAAACAGCATA
CDK9_e3.1	GTGGAAAGGACGAAACACCGGATCTCCCGCAAGGCTGTAAGTTTAAGAGCTATGCTGGAAACAGCATA
CDK9_e4.2	GTGGAAAGGACGAAACACCGGCTCGCAGAAGTCGAACACCGTTTAAGAGCTATGCTGGAAACAGCATA
CDK9_e5.1	GTGGAAAGGACGAAACACCGATGTGCTTATCACTCGTGATGTTTAAGAGCTATGCTGGAAACAGCATA
TIP60_e10_94.0	GTGGAAAGGACGAAACACCGATCAACGGAAGACTACAATGGTTTAAGAGCTATGCTGGAAACAGCATA
TIP60_e10_94.5	GTGGAAAGGACGAAACACCGTCAGCAGCTTGCCGTAGCCCGTTTAAGAGCTATGCTGGAAACAGCATA
TIP60_e10_94.8	GTGGAAAGGACGAAACACCGCCGTAGCCCCGGCGCTGGTAGTTTAAGAGCTATGCTGGAAACAGCATA
TTF2_D_e13_158.13	GTGGAAAGGACGAAACACCGATCCAATATGATTCGAGCCCGTTTAAGAGCTATGCTGGAAACAGCATA
TTF2_D_e20_151.8	GTGGAAAGGACGAAACACCGGGGATTGACAGAGCCATCGAGTTTAAGAGCTATGCTGGAAACAGCATA
TTF2_D_e21_83.3	GTGGAAAGGACGAAACACCGGGTGTTGGTCTAAACCTGACGTTTAAGAGCTATGCTGGAAACAGCATA
TTF2_D_e22_75.1	GTGGAAAGGACGAAACACCGGTGACCGAATTTACCGAGTAGTTTAAGAGCTATGCTGGAAACAGCATA
