# Supplementary material for: Transcriptional Silencing of ALDH2 Confers a Dependency on Fanconi Anemia Proteins in Acute Myeloid Leukemia
Source: Oxford University Press journal article supplement (doi:10.1158/2159-8290.cd-20-1542), 2021-04-23
Supplement: 21598290cd201542-sup-254337_2_supp_7041615_qr9hxx.xlsx [file 21598290cd201542-sup-254337_2_supp_7041615_qr9hxx.xlsx]

## Sheet: E2 and E3 CRISPR screen data
Average log2 FC in E2 and E3 domain-focused screen
	AML	AML	AML	AML	AML	AML	SCLC	SCLC	SCLC	SCLC	PDAC	PDAC
AKTIP	0.49115	-0.572679	-0.0162586	0.146382	-0.0586874	0.277381	0.211519	-0.277596	0.140289	-0.0775748	0.0908213	0.267176
AMBRA1	0.77574	-0.0191318	-1.76069	-0.349234	-2.85832	2.65391	-0.355892	0.362151	-3.36822	1.24644	0.772895	-1.32562
AMFR	-0.275111	-0.253889	0.105985	0.245898	-0.101894	0.156697	0.452958	-0.155544	0.300297	-0.636978	0.269491	-0.402115
ANAPC1	-2.23029	-0.613923	-2.06331	-1.79846	-0.799772	-0.675878	-2.44378	-1.41438	-2.18665	-0.903131	-2.18316	-0.256241
ANAPC10	-1.9373	-1.67605	-1.68921	-1.08305	-2.00007	-1.43376	-2.44269	-2.78379	-3.09709	-2.71359	-1.4335	-0.869584
ANAPC11	-7.45588	-4.87372	-6.92015	-4.10896	-5.50863	-4.55286	-5.90233	-7.08746	-8.02419	-6.35175	-5.62693	-3.95329
ANAPC13	-0.573527	-0.451571	-0.284816	-0.162109	-0.464068	0.421133	-0.768009	-0.158591	-0.940455	-2.15458	0.115441	-0.054383
ANAPC15	-3.65006	-1.30107	-2.94762	-1.58279	-2.36714	-0.732342	-2.18807	0.14103	-0.409522	-4.91852	-0.924299	-0.374211
ANAPC16	-0.664491	-1.00938	-0.244965	0.188898	-0.213174	-0.413688	-0.171245	0.0761901	0.241743	-2.38782	0.518007	-0.262294
ANAPC2	-5.2686	-3.56409	-5.26157	-3.80784	-5.77175	-2.78143	-6.07328	-7.23167	-6.61515	-5.60771	-4.87008	-3.12401
ANAPC4	-3.6068	-2.82859	-3.98384	-2.53824	-4.23214	-1.83949	-4.64911	-4.75184	-4.49276	-3.18462	-3.67338	-2.01546
ANAPC5	-4.28341	-3.76066	-5.00973	-2.19778	-3.61418	-1.86623	-4.14144	-4.52564	-3.95029	-5.94105	-3.07935	-3.00825
ANAPC7	-0.787639	-0.117178	-0.576162	-0.252629	-0.216676	0.106088	0.569542	-0.0922748	-0.0794572	-1.29673	-0.345495	0.0794606
ANKIB1	0.131739	-0.669276	0.122279	0.087612	0.338629	0.538831	0.531357	0.287921	-0.0610609	0.363324	0.398727	0.331361
AREL1	-0.110874	-0.205271	-0.403783	0.244894	0.0841711	0.0323121	0.00390469	-0.69882	-0.098346	-0.0552789	0.254129	-0.571696
ARIH1	-4.38507	-3.53756	-2.14203	-1.87736	-1.56125	-2.6842	-3.72925	-0.835384	-7.3338	-3.8706	-6.57776	-2.44195
ARIH2	0.32302	0.900267	0.183693	0.770404	0.968097	0.54558	0.598966	0.038943	-0.360635	0.295909	1.52634	1.81326
ASB1	0.0765272	-0.0170143	-0.112025	-0.042649	0.276294	0.259731	0.0779536	0.0695556	-0.199004	-0.382332	0.172058	-0.309916
ASB10	0.00672504	0.100023	-0.0391984	-0.223875	0.29091	0.136297	-0.586528	-0.19597	-0.542011	-1.73631	0.0562046	0.00633607
ASB11	0.551049	0.273437	0.40989	0.277302	0.254485	0.357684	0.266001	-0.118388	0.23377	0.97642	-0.114354	0.0232527
ASB12	0.541312	0.395599	0.559045	0.215377	0.285329	0.00790036	0.332484	-0.00144564	0.292615	-0.42336	0.123015	0.193284
ASB13	0.0644523	-0.451239	0.0561221	0.0200974	0.0423992	0.180358	-0.0412907	0.289531	-0.103243	-0.448276	-0.0552307	-0.399577
ASB14	0.103073	0.04386	0.157629	0.179788	0.344283	0.367945	-0.0248856	0.347332	0.137516	-1.46304	0.274544	0.121047
ASB15	0.247882	0.652232	0.435417	0.352022	0.266461	0.343991	0.296584	0.368065	0.314888	0.192283	0.253181	0.179789
ASB16	0.0183576	0.0153858	-0.0246886	-0.243168	0.081218	0.0995031	-0.00646582	-0.441395	-0.2651	-0.555003	-0.139077	-1.217
ASB17	0.239191	0.45368	0.203028	0.14151	0.448613	0.03465	0.165504	-0.0334301	0.247976	0.225529	0.183336	-0.216144
ASB18	0.178724	-0.159811	0.0989846	0.273056	0.0948085	-0.161283	0.442816	-0.0206665	0.251809	-0.816991	-0.0515278	-0.0571284
ASB2	0.23867	-0.204618	0.00405497	0.352745	0.382801	0.00775447	0.225815	-0.12121	-0.491247	-0.949583	0.328201	-0.139127
ASB3	0.0545959	0.638182	-0.0679662	0.393813	0.0971899	-0.0638351	0.236206	-0.294339	-0.69778	-0.130933	0.268342	0.370666
ASB4	0.400156	-1.29776	0.273021	0.238853	0.391011	0.179964	0.115868	0.0892823	-0.0623812	0.275681	-0.245343	0.189354
ASB5	0.339979	-0.164794	0.283858	0.298289	0.322643	-0.119565	0.17419	0.442926	0.299918	0.168262	0.368544	0.0440373
ASB6	-0.241115	-0.162054	0.0598635	0.00827241	0.626836	-0.555465	0.120811	-0.32144	0.158123	-0.161577	-0.0986083	0.279314
ASB7	0.116951	0.000543405	-0.30388	0.068523	0.30748	0.417136	0.495867	0.405502	-0.151038	0.532943	0.482196	0.5073
ASB8	0.0679945	0.0465414	-0.086734	0.0740405	0.0777079	-0.253047	0.252987	-0.3197	-0.244071	-1.32469	0.114787	0.151876
ASB9	0.241918	0.17297	0.537528	0.218287	0.112793	0.270053	0.306299	0.164078	0.140185	1.23189	0.253913	0.238495
BARD1	-3.99003	-3.14073	-3.91535	-1.81519	-2.95422	-2.82007	-4.92181	-4.4006	-4.79431	-4.30112	-3.83675	-1.81125
BFAR	0.19439	0.0293638	-0.0440016	0.299644	0.110092	0.430203	0.183089	-0.243448	0.00200696	-0.454054	-0.10185	0.466301
BIRC2	-0.647572	-1.15081	-0.346759	-0.366149	-0.6988	-1.77084	-1.79582	0.196652	-1.48401	-1.51363	-0.411935	-0.167117
BIRC3	0.29622	0.138659	0.373046	0.31352	0.557631	0.30791	0.180232	0.246504	-0.125563	0.212624	0.707365	-0.0229099
BIRC6	0.638942	0.430609	0.335109	0.409373	-0.809688	-1.01398	-0.785456	-2.88907	-2.62416	-0.68984	-0.594833	-1.84868
BIRC7	0.273734	0.0565157	0.49635	0.0322638	0.236459	0.422468	-0.0660076	-0.00333179	-0.381992	0.177546	0.224154	0.297162
BIRC8	-0.139983	0.602751	0.208721	0.138922	0.367511	0.60126	0.317515	0.3959	0.230102	0.341599	0.0592243	-0.0491257
BMI1	-1.28034	1.90009	0.0444439	-0.270421	0.235208	0.67456	0.137037	0.0289058	0.351448	-0.824302	0.330997	0.215347
BRAP	-1.41754	-0.571201	-2.81444	-1.11747	0.37079	-2.60973	-1.86713	-2.13579	-0.453952	-3.40194	-4.02278	-1.88641
BRCA1	-2.40066	-1.27529	-1.9773	-1.38799	-1.78125	-0.44774	-3.17291	-1.8559	-1.8553	-2.00269	-2.05776	-1.21762
BRWD1	0.0604467	-0.130895	0.791573	0.0194664	-0.535036	0.0260721	0.456111	0.0987139	0.0198904	0.350564	0.079311	0.56494
BTRC	0.337777	0.381645	0.430164	0.0465358	0.0670314	-0.00523129	-0.152063	-0.551926	0.48853	-0.556782	-0.0530569	0.0400089
CBL	-1.62731	-0.36824	-0.616552	0.062857	0.604516	0.190778	0.782858	0.628936	0.198332	0.605502	0.38755	0.139536
CBLB	0.0607279	0.345068	0.297452	0.470422	0.119011	0.255127	0.506881	0.38968	0.28651	0.859016	-0.0167193	0.273244
CBLC	0.219209	-0.411916	-0.472558	-0.266823	0.314587	-0.193196	-0.206991	0.0389765	-0.221753	-0.19913	0.0750713	-0.0370893
CBLL1	-1.62871	-1.47015	-1.07699	-2.56213	-0.607147	-1.43661	-3.63862	-3.15111	-6.03719	-0.58052	-2.11136	-2.42945
CCNB1IP1	-0.0286898	0.104542	0.184918	-0.0666752	-0.0505	0.197128	-0.0744448	0.0161421	-0.14316	0.084255	0.115008	-0.0349743
CCNF	-0.900112	-0.277851	-2.81425	-1.0447	-0.592934	0.0731425	-0.78345	0.373633	0.079357	-1.15299	0.682101	0.233006
CDC16	-7.29845	-5.79442	-6.50536	-5.02112	-5.4345	-4.46852	-7.72466	-6.81893	-7.57277	-6.222	-5.40293	-3.99946
CDC20	-4.96932	-3.7132	-4.16391	-3.14242	-4.73926	-2.78584	-3.43604	-5.97296	-7.19674	-4.07299	-5.89851	-2.42777
CDC23	-6.67723	-3.65696	-5.93778	-4.61383	-4.80176	-3.11958	-6.01489	-5.87641	-6.02631	-5.51598	-6.16431	-4.13244
CDC26	-0.766924	-1.24198	-1.63339	-1.11932	-3.40398	-0.204599	-0.885582	-3.4016	-0.919457	-2.57224	-0.857224	-0.408998
CDC27	-4.98508	-3.72037	-3.60272	-3.48421	-5.56014	-1.06062	-5.38057	-7.27246	-6.37916	-4.02675	-4.92198	-4.29014
CDC34	-0.554382	-0.176737	-1.27934	-0.281944	0.0654259	-0.956714	-0.260072	0.167021	-0.114694	-0.51018	-0.178203	-0.3295
CDH1	0.210636	0.0118899	0.0312923	0.0281133	0.115014	-0.335155	0.18339	-0.705371	-0.0315469	-1.82181	0.225055	1.00552
CDRT1	-0.61161	-1.46782	-0.477383	0.0144465	-0.256262	-0.0362351	-0.455265	-0.0462462	-0.175258	0.505327	0.035771	-0.307599
CGRRF1	0.317325	0.692847	0.0695532	0.0735993	0.202977	0.46226	0.104017	0.148248	-0.283869	-0.552699	-0.13254	-0.248833
CHFR	-0.201547	-0.162345	-0.491392	-0.261231	0.07433	-0.436004	0.631645	-0.214916	-1.43977	-1.99022	-0.322277	-0.836232
CISH	-0.0375004	0.111193	0.399323	-0.00730948	0.366613	0.3353	0.0220798	-0.701359	0.131687	-0.594298	0.291492	0.135737
CNBP	-0.136095	-0.404974	-0.0683387	-0.374179	-0.22549	-1.13467	0.576995	-0.0289578	-1.81633	0.205266	0.22408	0.00954572
CNOT4	-2.74251	-1.66191	-2.33465	-0.259	-1.05038	-1.63249	-0.255442	-0.748459	-1.3593	-2.67989	-1.34828	0.220637
COMMD3	-0.490605	-0.738008	0.447765	-0.0859682	-0.431291	0.0933774	0.361082	-0.590807	-4.72505	-0.199611	0.465861	-0.085859
CUL1	-3.44013	-3.94102	-4.55872	-2.10335	-4.28743	-4.83938	-5.44499	-4.37261	-5.46399	-6.99283	-6.08289	-2.72601
CUL2	-3.07336	-3.59543	-4.6105	-3.12361	-1.80357	-0.110293	-1.85629	-2.83787	-2.07707	-4.56381	-1.79574	-1.50453
CUL3	-3.48277	-3.15907	-3.1573	-2.86134	-0.474121	-3.86497	-3.66147	-5.11028	-4.73247	-3.92601	-3.41409	-1.82681
CUL4A	-0.935355	-0.401159	-0.585949	0.0882092	-2.50091	0.511646	0.318942	-0.401485	0.123056	-1.36064	-0.423862	0.118413
CUL4B	-0.0718695	-0.0995004	-0.0198317	-0.971187	-0.058418	0.2796	0.787926	-0.300185	-0.0640937	-0.317536	-0.124324	-0.398056
CUL5	0.352304	0.218733	0.526923	0.751812	0.969475	0.521755	0.662926	0.367334	0.349733	0.700778	0.908234	1.64018
CUL7	-0.188834	-0.266185	-0.313789	-0.412306	-0.165777	0.281236	-0.102061	-0.351714	-0.320507	-0.698008	0.0917187	-0.176817
CUL9	-0.225144	0.373893	0.151858	0.00407719	-0.172558	0.0023284	0.188064	-0.135653	0.0970252	-0.596752	0.190581	0.0475691
CYHR1	-0.757824	-0.257379	-0.195803	0.00900213	0.332394	0.19938	0.268229	-0.154871	-0.290952	-0.0826883	0.0142206	-0.0812444
DCAF1	-4.6805	-2.06589	-2.95115	-2.16524	-3.10258	-1.58382	-4.23487	-4.3045	-4.58804	-3.66417	-3.96655	-2.42429
DCAF10	0.441301	0.061962	0.156451	0.493568	-0.0344176	-0.345761	0.490801	-0.100172	0.388245	-1.52079	0.340871	0.298499
DCAF11	0.134295	-0.0425421	-0.0521311	0.086357	-0.0624567	-0.425117	0.224882	-0.0641019	0.138029	-0.938944	-0.145931	-0.538762
DCAF12	0.11948	-0.272184	0.386075	0.00783411	0.0504493	0.409163	0.0745676	-0.181593	0.653274	-0.59121	-0.299897	0.153207
DCAF12L1	0.638652	0.20803	0.129285	0.0614564	0.522592	0.279274	0.682942	0.063387	0.224876	0.191121	-0.0438481	0.21157
DCAF13	-3.48642	-4.1599	-4.24161	-2.45203	-2.42564	-2.23115	-4.04701	-4.8194	-3.85274	-3.40285	-3.56462	-2.82765
DCAF15	-0.916075	-0.51416	-1.78488	-0.106796	-0.222764	-3.80658	-0.872978	-2.93678	-3.00947	-0.478344	-0.471834	0.392984
DCAF16	-0.416898	-0.293352	0.386905	0.517489	0.271877	0.0563808	0.48175	0.747348	0.0365512	0.502338	0.00691506	-0.152953
DCAF17	0.0226054	-0.0252524	-0.170899	0.161981	0.184812	0.0138052	0.292046	-0.0212415	0.420612	0.142059	0.236613	0.18382
DCAF4	-1.48322	-0.265042	-1.17405	-0.252521	-0.195255	0.0258714	-1.21728	-1.65132	-0.305923	-1.43946	-0.17235	-1.09074
DCAF5	-0.288749	-0.357366	-0.791006	-0.0834768	-0.115026	-0.10861	-0.489173	0.0329972	-0.354288	-0.247344	-0.485374	0.0970747
DCAF6	0.428948	0.201582	-0.0184145	0.253106	0.115703	0.0140726	0.361475	-0.189587	0.0720983	-0.295736	-0.0170654	0.0457168
DCAF7	-3.90066	-3.74931	-5.80116	-2.94363	-2.69371	-3.76786	-3.4083	-1.68895	-3.16726	-4.46338	-1.91202	-2.38045
DCAF8	0.196493	-0.142468	-0.130061	0.00231004	0.128253	-0.491457	0.154658	-0.628519	0.157107	-1.36091	0.0987172	0.128312
DCST1	0.0821431	-0.410307	-0.410798	0.2281	-0.0835543	-0.0840714	-0.180972	-0.0781922	0.410753	-1.65606	0.000500883	0.233162
DCUN1D1	0.475051	0.331494	0.393528	0.518914	0.639008	0.201013	0.040099	0.69046	0.127294	-3.07673	0.285396	-0.305317
DCUN1D2	-0.181612	0.10361	0.0195267	0.332397	0.153216	0.190603	0.304576	-0.0090236	0.516197	0.0637884	-0.28945	0.12881
DCUN1D3	0.112344	0.614531	0.526018	0.479109	0.540489	0.0833905	0.889498	0.59758	0.54974	-0.376509	0.572622	0.981079
DDA1	0.32473	-0.155595	0.0230424	-0.301713	-0.819062	-0.375769	0.679303	-1.32719	0.320588	0.0379998	-0.22895	-0.0822433
DDB1	-4.91446	-3.6065	-5.38442	-3.76912	-5.20281	-3.88942	-4.69213	-5.19884	-4.75965	-4.34223	-5.31056	-2.73087
DTL	-4.97888	-2.74557	-3.58253	-2.6393	-3.2964	-1.39424	-3.5149	-2.8106	-2.90302	-3.49796	-4.82011	-1.43889
DTX1	0.47532	-0.11418	-0.00588969	0.0790582	0.0530992	-0.327213	0.323311	-0.131957	-0.157737	-0.76414	-0.0292387	0.106554
DTX2	-0.954648	-0.797489	-1.0123	-0.258676	-0.127865	-0.474769	-0.156489	-0.362185	0.0582231	-0.530503	-0.976268	-0.289162
DTX3	-0.227557	-0.630071	-0.0247224	-0.376587	-0.191675	-0.778803	-0.123948	0.145144	-0.0280566	-0.456311	0.075091	-0.153931
DTX3L	-0.16914	-0.315437	-0.131464	0.346049	-0.21027	0.0101941	0.0330487	-0.394924	0.235657	-0.509389	0.203555	-0.0256927
DTX4	0.388942	0.0707639	-0.402671	0.0569535	0.177963	0.186113	0.28672	0.508332	0.373879	0.12611	0.0626856	-0.0676354
DZIP3	0.336901	0.488918	-0.0369005	0.0974044	0.0638756	0.3867	-0.0147789	0.299795	0.268591	0.116937	0.469367	-0.111356
ECT2L	-0.361919	0.000505849	0.369612	0.34065	0.311358	0.765635	0.475139	0.293336	0.518844	-0.863078	0.370463	0.121069
ELOB	-2.91492	-2.38269	-3.26316	-2.37399	-3.08012	-2.58212	-3.05069	-3.32745	-3.28422	-2.92187	-2.51954	-1.46036
ELOC	-1.89912	-0.793153	-1.61459	-0.978548	0.267279	-0.239077	-2.11797	-2.15995	-3.43505	-2.28243	-1.74646	-0.593037
FANCL	-4.03317	-1.25667	-2.68727	-2.88154	-0.325653	-0.457055	-0.245785	-0.154741	0.00964029	0.120255	0.292298	-0.0255348
FBXL12	-0.214942	-0.407987	-1.64127	-0.267671	-1.28686	0.239991	0.170951	-0.864386	-0.118796	-1.48168	0.230091	-0.167585
FBXL13	0.209205	0.397787	0.12563	0.306409	0.342618	0.393562	0.239662	-0.0783392	0.509931	-0.23225	0.151071	0.216952
FBXL14	0.132882	0.373688	0.182992	0.229551	-0.151651	0.266113	0.00695223	-0.101256	0.526498	-0.240494	-0.170602	-0.189427
FBXL15	0.0579478	0.441264	-0.320467	-0.112646	-0.382636	-0.225362	-0.133021	0.0531877	0.0809974	-0.618545	0.048829	0.203838
FBXL16	0.0614251	-0.809127	-0.529732	-0.186983	0.0744318	0.130313	-0.103889	0.164751	0.39248	-1.75958	-0.212136	0.349509
FBXL17	-0.610652	-0.427223	-1.72594	0.0266296	-0.514166	-1.04328	-0.309918	0.176517	1.23895	1.96637	-0.366451	-0.713193
FBXL18	-0.0847913	-0.32215	0.0141049	0.22384	-0.144841	-0.145595	-0.3697	-0.0854498	-0.216597	0.453312	-0.12678	-0.486451
FBXL19	-0.280518	-1.39817	-0.966024	-0.0935779	-0.786755	-0.989571	0.0587813	-0.642818	0.589063	-1.42368	0.0918584	-0.535814
FBXL2	0.155314	0.145839	0.110717	0.173194	0.30217	0.264306	0.336169	0.0961135	0.524221	-0.738023	0.318403	0.252015
FBXL20	0.144534	0.13141	-0.0220347	0.0600428	0.115042	-0.0246923	0.0998377	1.05511	0.445693	0.193123	0.761493	-0.850471
FBXL21	0.276411	-0.292423	0.0899433	0.353796	0.344142	0.163625	0.0671614	-0.034144	0.137385	0.181969	0.279508	0.0657398
FBXL22	0.167653	-0.293525	-0.175202	0.0962814	0.0586702	-0.258742	-0.254041	0.129277	0.178727	-2.16493	-0.046962	0.0613434
FBXL3	-0.133211	-0.0247453	-0.0757733	0.352726	0.0962235	-0.0695767	0.41755	0.0565868	0.434136	-0.0304156	-0.0750871	0.205183
FBXL4	0.180527	0.368435	0.197008	0.190084	-0.0857878	0.424109	0.224301	0.25064	0.0993894	-0.397418	0.419466	0.195715
FBXL5	0.921215	-1.16684	-0.15677	0.3275	-1.13851	0.258099	-2.26478	-1.94889	0.401417	-0.232773	0.219381	-0.136964
FBXL6	-1.48429	-0.386263	-0.679826	-0.0393468	-0.019249	-0.556129	0.341809	-0.544949	-1.60762	-0.384638	-0.623925	-0.258543
FBXL7	0.187333	-0.323862	0.0659755	0.222653	0.4266	0.134461	0.185033	0.127062	0.292999	-0.268044	-0.0902081	-0.15607
FBXL8	-0.257495	-0.60322	0.134402	-0.291553	0.101222	0.0130809	0.0712105	-0.370256	0.292318	-0.9301	-0.17628	-0.0513713
FBXO10	0.0294208	0.259099	0.250937	-0.0769309	-0.124315	-0.00665152	0.0484088	-0.107686	0.379914	-0.845645	0.0851072	-0.0061173
FBXO11	-1.80622	-1.08788	-2.37669	-1.52545	-0.770324	0.060781	0.232066	0.327885	-2.61526	-2.63541	0.223855	-0.99985
FBXO15	0.271393	0.0424533	-0.0570392	0.300429	-0.0243134	0.375324	-0.106671	-0.127345	0.498031	0.114954	0.336192	-0.105993
FBXO16	-0.793938	0.159908	-0.190442	0.396643	0.0435596	0.432685	0.817602	0.251431	0.0831452	-0.0580757	0.223386	-0.241419
FBXO17	-0.427592	-0.299789	-1.39749	0.221237	0.253471	-0.510869	-0.258921	-0.372034	-1.35372	-1.45487	-0.0232742	-0.511929
FBXO18	0.168751	-0.193815	0.268797	-0.139407	0.155182	0.29654	0.246953	-0.285485	0.247385	0.175624	0.130064	-0.215295
FBXO2	-0.116588	-0.734492	0.0229594	0.189591	0.127993	-0.299939	-0.328446	-2.17472	-0.773125	-1.99774	0.13663	-0.202944
FBXO21	0.0265351	0.0328661	-0.229989	0.318882	-0.184816	-0.421027	0.220616	-0.229778	-0.176307	-1.05131	0.0340526	-0.120011
FBXO22	-0.85143	0.00767569	-0.650865	-0.0545447	0.0287725	-0.806213	-0.260236	0.0101935	0.240484	-2.52661	-0.0362048	0.25077
FBXO24	-0.198462	-0.3405	-0.00213844	0.0685709	0.153625	-0.2844	0.147682	0.318069	0.359982	-1.1737	0.398897	-0.196185
FBXO25	-0.930541	-0.754838	-0.31741	-0.0206079	0.377226	0.437566	0.281147	-0.0659385	0.354497	0.281578	0.303318	0.0327571
FBXO27	-0.609999	-0.131888	-0.656748	0.183151	0.288997	0.147596	-0.173139	-1.27755	0.240812	-4.02596	0.226541	-0.111444
FBXO28	0.625781	-0.70058	-0.0190834	0.0478784	-0.092227	-0.709317	0.0472869	-0.449255	-2.09844	-5.40025	-1.7003	-0.727277
FBXO3	0.149194	-0.185945	0.111421	0.153922	-0.448203	0.26237	0.256415	0.0834302	-0.34434	-3.84784	0.0816273	0.0248392
FBXO30	0.0444302	-0.0300444	0.180538	0.116219	0.0957546	-0.137075	0.248636	0.163707	-0.0804465	0.297368	0.241868	-0.051855
FBXO31	0.185609	-0.390244	0.247632	-0.089338	-0.0137713	0.700597	-0.115872	0.398274	-0.0488092	-1.2384	-0.191326	-0.17068
FBXO32	-0.0330406	0.382989	0.159761	0.543351	0.157386	0.0822909	0.456187	0.31971	0.153669	0.469302	0.198637	0.49091
FBXO33	0.0759373	-0.0584261	-0.617269	0.160175	-0.244958	0.101191	-0.0535959	1.10561	0.334289	1.05167	-1.07599	-0.987438
FBXO34	0.190899	-0.137062	-0.0120514	0.389854	0.0379656	0.314788	0.119335	-0.021493	-0.305835	-0.230939	0.128633	-0.0949314
FBXO36	0.52838	-0.0482458	0.328131	0.331558	0.809141	0.40902	0.340476	0.0623492	0.156911	0.671558	0.0765948	0.0377685
FBXO38	-0.0231477	0.329468	0.0213721	0.132109	-0.164974	0.162192	0.294337	0.712834	-0.587509	-0.480818	0.0125922	-0.0520521
FBXO39	-0.013464	-0.281129	0.456776	0.0618939	0.304674	0.246823	0.337996	0.57943	0.405706	-0.0915172	0.339123	0.460427
FBXO4	0.266855	0.12838	0.234902	0.262588	0.468055	-0.109527	0.161613	-0.057371	0.317333	-0.261317	0.390104	0.246305
FBXO40	0.00774307	0.0731335	0.481494	0.135039	0.214676	-0.174908	0.181127	-0.217274	0.389315	-0.728293	0.210701	0.0702828
FBXO41	-0.000964643	-0.127058	-0.165242	0.139884	-0.00418899	-0.0159442	-0.0674427	-0.752832	0.0476587	-2.33548	0.000616564	-0.196875
FBXO42	0.976035	-0.912867	1.84485	-0.756117	-0.437123	0.369659	-0.370305	-1.11484	-2.11229	-0.630364	0.34634	-1.37816
FBXO43	-0.670945	-0.544651	-0.514666	-0.0762935	0.0417231	-0.400331	0.00456426	-0.803855	-0.223635	-1.2678	-0.0657241	0.24875
FBXO44	-0.0969129	-0.889402	0.0177483	0.46175	-0.625549	-0.0523875	-0.464539	-1.4265	-0.219256	-0.881304	0.000633731	0.192098
FBXO45	0.103592	-1.20012	0.261379	0.474079	0.403118	0.0257781	-0.157675	-0.127603	0.126936	0.0941234	0.365358	0.111466
FBXO46	-0.475059	-1.13538	-0.487288	-0.0678126	0.612775	0.0171905	-0.090859	-0.453563	-0.0404614	-0.117938	-0.299832	0.0904905
FBXO47	0.391516	0.316242	0.0433388	0.270715	0.056814	0.486407	0.224531	0.0735126	-1.1636	0.123443	0.296683	-1.27884
FBXO48	-0.0242434	0.224463	0.492016	0.604552	-0.414227	0.14724	0.261134	-0.41701	0.380715	-0.922889	0.538392	-0.169572
FBXO5	-1.68554	-1.43769	-2.8615	-1.77909	-1.37512	-2.13914	-2.08499	-1.66364	-3.41495	-2.07304	-5.04257	-2.25984
FBXO6	-0.118878	-0.233755	-0.0930342	-0.0986696	0.143961	0.326349	0.0181139	-0.377161	-0.31203	0.0310581	0.155346	-0.0067168
FBXO7	-0.287646	-1.1714	-1.07749	0.0711893	-0.0476049	-0.752456	-0.140863	0.176282	0.180003	0.0477962	0.455765	-0.354196
FBXO8	0.274075	0.472576	0.269167	0.354974	0.264718	0.321095	0.578887	-0.214974	0.389382	0.820644	0.531605	-0.010225
FBXO9	-0.161107	0.36394	0.108826	0.0029634	-0.0938955	0.432359	-0.0829791	-0.375946	0.159223	-0.508969	0.215349	-0.261827
FBXW10	0.0730819	-0.258335	0.00781055	-0.508884	-0.107023	0.0831434	0.202283	-0.107886	0.663204	-0.0498795	-0.416669	0.0323379
FBXW11	-2.73609	-1.31125	-3.67733	-2.26135	-4.25019	-2.71502	-1.33741	0.116482	-1.19496	-0.392821	-0.0294279	0.230255
FBXW12	0.109488	-0.373679	-0.12486	-0.0621394	0.161486	0.426062	0.0952879	0.185318	0.30406	-0.291275	0.135832	0.431023
FBXW2	-0.187296	-0.240727	-0.0351591	-0.2618	-0.27122	0.0202083	-0.0183481	-0.259595	0.16132	-0.747113	0.307927	0.286892
FBXW4	0.158664	-0.0430421	0.191316	0.0966253	-0.0924466	0.19024	0.0893164	0.0271189	0.175022	-0.665338	0.112686	-0.181225
FBXW5	-0.00361641	-0.459754	-0.152394	-0.0482348	0.129158	-0.315625	0.297229	-0.281302	0.285765	-0.504103	-0.152473	-0.203625
FBXW7	-1.94269	-0.0361755	1.11259	-2.06496	-4.49467	-2.30368	-3.5141	-1.10513	-5.69715	-3.77106	-5.32388	-0.655321
FBXW8	-0.192066	-0.197271	-0.551728	0.0242326	0.141274	0.00289693	0.204533	0.130968	-0.575227	-0.549546	-0.0497628	-0.532588
FBXW9	-0.335177	-0.313113	-0.948874	-0.114269	0.0165764	-0.0745363	-0.162593	-0.405799	0.0246953	-0.213759	-0.426201	-0.234269
G2E3	0.21391	0.323731	0.0446111	0.312766	-0.0886987	-0.00401657	-0.117561	-0.0824378	0.233491	-0.0949056	0.363366	0.237806
HACE1	0.1882	-0.49178	0.0687289	0.306779	0.129453	0.0948666	0.362366	0.352184	0.316383	0.257012	0.106078	0.263231
HECTD1	-0.427732	-1.02234	-1.23909	-1.00205	-0.478451	-1.99187	-0.674227	-2.04746	-1.33198	-2.34115	-0.0149452	-1.61585
HECTD2	0.318795	-0.264598	0.0534107	-0.0234453	0.172707	-0.537947	0.226318	0.0751836	0.731768	-0.930235	0.330342	-0.187984
HECTD3	-0.257578	-0.00612594	-0.478823	-0.0433107	-0.0624106	0.0529155	0.269676	0.155956	0.217509	-2.56308	0.184553	0.250768
HECTD4	-0.143626	-0.330919	0.215552	-0.134469	-0.00861931	-0.244545	0.28351	0.0520373	-0.940182	-0.931355	0.0796697	-0.229812
HECW1	0.152077	0.495493	0.127814	0.382008	0.0124879	-0.0294909	0.199996	-0.563506	0.15287	-1.63827	0.284662	0.178624
HECW2	0.224007	0.0497536	0.155962	0.410123	0.0605758	-0.232422	0.193218	-0.407012	0.0488621	0.10002	0.0270711	-0.292488
HERC1	-0.0217912	-0.428869	0.0458692	-0.267857	0.00396955	-1.71089	-0.411155	0.0476958	0.0352633	-0.671208	0.162173	-0.585921
HERC2	-0.0122831	-0.516389	0.277745	0.551514	0.301647	-0.128787	-0.395633	0.248708	0.122983	-0.487104	0.271298	-0.567689
HERC3	0.320806	0.154302	-0.242706	0.317932	0.0791587	0.288043	0.0629476	-0.113335	0.318258	0.584224	0.210061	-0.00639487
HERC4	0.267449	0.273084	0.297589	0.340619	0.0905811	-0.406283	0.229171	0.338701	0.362924	-0.180615	-0.00543235	-0.296968
HERC5	-0.0583972	-0.18344	0.192223	0.119709	-0.0300598	0.0914332	0.329716	-0.0686246	0.775724	0.135415	0.364058	0.0446957
HERC6	0.182965	-0.395168	0.0744896	0.276534	0.114207	0.068967	0.272178	0.130951	0.499746	-0.135538	0.299841	0.216634
HLTF	0.134304	0.267427	0.182978	0.379492	0.310213	0.232509	0.393466	-0.0433068	0.358976	0.167487	0.112854	0.0559671
HUWE1	-3.74427	-2.89321	-5.26131	-2.846	-1.62767	-1.10581	-2.34212	-1.42885	-3.66726	-5.07921	-4.05204	-1.67637
IRF2BP1	-2.22525	-0.168068	-3.14353	-0.317926	-0.0377304	-0.651273	0.104718	-0.257395	-0.555877	-1.11413	-1.4447	-0.671171
IRF2BPL	0.376978	-0.184391	-0.0899985	-0.235813	0.535302	0.065777	0.276872	0.345207	0.067959	-0.0210931	0.0219668	-0.799068
ITCH	0.150331	0.252753	0.327165	0.528017	0.29105	0.537878	0.262037	-0.310267	0.106129	0.26353	1.02657	0.351468
KDM2A	-4.15014	-1.67245	-4.53877	-2.50912	-1.17474	-3.76959	-4.31678	-3.00276	-5.28207	-4.60849	-0.508381	-0.673988
KDM2B	-0.0153277	-0.618998	-2.69706	-1.36097	0.0247529	-2.70618	-0.311283	-4.55766	-4.27049	-4.34793	-0.663657	0.089942
KMT2A	0.0208398	-1.69693	-0.58893	-0.491553	-0.216693	-2.02208	-5.92042	-2.30458	-0.858503	-0.617885	-1.37802	-3.03822
KMT2B	-4.8759	-2.66985	-3.75988	-3.59271	-0.124068	-1.01828	0.199256	-1.41902	-0.677913	-5.28145	0.00842191	-0.329214
KMT2C	-0.900843	-0.257789	0.0381661	-0.547056	-0.707477	0.465968	-4.43277	-1.30271	-5.57922	0.211746	-0.228445	-0.0245657
KMT2D	-0.107268	-0.605142	-1.78155	-1.12719	-2.85909	-4.17747	0.132432	-3.73526	0.226549	-4.01177	-1.0403	-1.29468
LNX1	-0.141337	-0.326381	-0.362101	0.0390006	-0.186211	-0.778046	0.0654926	-1.06914	-0.0227378	-0.525606	-0.399763	0.257831
LNX2	-0.168089	-0.128924	-0.00907499	-0.619096	0.0863794	0.244058	0.179507	-0.639752	0.401713	-0.104996	0.110928	-0.109355
LONRF1	-0.584448	-0.0536746	0.013141	0.0309516	0.477862	0.0798376	0.272656	0.00894282	-0.0799845	0.655877	0.064971	0.272054
LONRF2	-0.390503	0.0636081	0.210724	-0.2014	-0.29392	-0.219531	0.159185	-0.593308	0.136163	-1.67946	-0.0391849	0.144598
LONRF3	0.557027	-0.0908889	0.260432	0.0171082	0.439605	0.536823	0.4432	-0.0482902	0.191944	-0.142216	0.377916	0.173956
LRSAM1	-0.2507	-0.597678	-0.264581	-0.0505455	-0.0742301	-0.0425248	0.0380394	-0.937147	0.0607661	-2.41297	-0.445173	-0.342234
LTN1	0.539722	0.619268	0.709989	0.38247	-0.0607441	0.667693	-0.000890011	0.0927967	0.377574	0.335633	-0.215635	0.654797
MAP3K1	0.215388	0.17201	-0.00114914	0.183654	0.131054	-0.309411	0.00573934	-0.039422	0.51622	-0.565193	-0.146234	0.0340253
MARCH1	0.157117	0.419762	0.0831874	0.22614	0.313829	0.215388	0.431719	0.499555	0.16292	0.00988788	0.111149	0.418896
MARCH10	-0.133205	0.183899	0.429947	-0.0620827	0.697245	0.0869868	-1.3141	-0.877801	-0.146086	-1.56088	-0.0112964	-0.581911
MARCH11	0.175125	-0.576149	-0.193129	-0.0332913	0.41649	0.0520798	0.171262	0.555689	0.288606	0.0759353	0.294617	0.356841
MARCH2	0.154391	0.127289	-0.804921	0.0812537	-0.287295	0.0120486	-0.174525	0.460496	0.238951	-0.608834	0.0361286	0.29774
MARCH3	0.258042	0.452281	0.496681	0.265206	0.115012	-0.153849	0.300324	0.631031	0.249429	0.228935	0.259236	0.299232
MARCH4	0.202302	0.167249	0.173499	0.322904	0.321426	0.273512	-0.246156	-0.343529	0.105126	-1.02626	0.0912622	0.0832627
MARCH5	-5.27494	-3.65006	-7.12453	-1.3719	-2.41281	-3.82949	-2.6247	-6.78433	-4.02864	-6.95396	-0.186839	-3.72569
MARCH6	-1.45583	-2.30057	-0.487012	-0.704753	-0.152196	-0.799993	-2.799	-0.710879	-0.99227	-0.232164	-1.00583	-0.806739
MARCH7	0.360684	0.0662628	0.294518	-0.0835524	0.0294618	0.498036	0.190962	-0.181241	-0.30138	0.647877	-0.00212615	0.0299968
MARCH8	-0.0253976	0.154507	0.218068	0.133095	0.14863	-0.0758386	0.350329	0.141257	-0.017795	-0.638892	0.0554963	-0.00944489
MARCH9	-0.168346	-0.916846	-0.320709	-0.177433	-0.280978	-0.616632	-0.187078	-0.397333	-0.0605185	-2.74277	0.181165	-1.08512
MDM2	-5.08382	-0.318858	-6.02282	0.189182	-0.171232	0.260426	0.130954	0.0599648	-0.209076	-0.692225	-0.12832	-0.247101
MDM4	-5.5981	-0.684791	-6.93516	-0.0725032	0.0289131	-0.0359921	0.153343	-0.208399	-0.0482924	-0.885922	0.109001	0.214683
MEX3A	-0.559058	-1.09984	-0.493118	-0.202087	-0.849193	-0.51276	-0.198831	-0.731547	-0.969922	-2.80341	-0.413848	-0.052465
MEX3B	0.0758476	0.0267806	0.127568	0.379309	-0.204904	-0.0632674	0.154951	-1.07952	0.302904	0.0166422	-0.0637543	-0.257142
MEX3C	0.115121	0.340971	0.362048	0.13807	0.200067	-0.24723	0.193388	0.193192	0.361043	0.699765	0.368456	0.422637
MEX3D	0.200434	-0.511599	0.0812546	-0.0427643	0.00698201	0.102306	0.384036	-0.268382	-0.268878	0.494619	0.16613	0.0210065
MGRN1	-0.00248639	-0.199286	-0.534007	-0.358131	-0.0505179	-0.0729342	0.302696	0.268165	-0.438254	-2.6272	-0.398575	-0.509548
MIB1	0.272223	0.115765	0.309012	-1.76156	0.377483	0.177538	0.35943	-2.36079	-3.89471	-1.33157	-0.290622	0.600044
MIB2	-0.223451	-0.301527	-0.0130582	-0.0884601	-0.432175	0.0083592	0.0313884	-1.06927	-0.994361	-1.98339	-0.302848	-0.774827
MID1	0.650205	0.179857	0.630709	0.0943739	0.41851	0.243491	0.40768	-0.0428084	-0.296786	0.634698	0.195357	0.167895
MID2	0.446409	-0.13935	0.37397	0.16228	0.102843	0.416596	0.397033	-0.203793	0.462353	0.402061	0.359685	0.173128
MKRN1	0.175609	0.183546	0.238326	0.350164	-0.132545	0.0613971	0.0721644	-0.831361	-0.948901	-0.449503	0.0316237	-0.101852
MKRN2	0.412453	-0.149165	0.607692	0.358189	-0.181501	0.0605254	0.242003	-0.153598	0.448496	-0.79651	0.445318	0.0668973
MKRN3	-0.0737835	-0.231368	0.194874	0.309496	0.416183	-0.0309081	0.018954	0.518234	0.0902747	0.255789	-0.0408681	0.134475
MNAT1	-3.91029	-2.9939	-3.12125	-2.8392	-2.59728	-2.08798	-3.60186	-3.55542	-3.90625	-2.87629	-4.27453	-2.52476
MSL2	0.21801	-0.67228	-1.97412	-0.558837	0.0302898	-0.0149001	-0.496545	-1.22624	-1.58731	-0.551865	-0.586327	-0.476296
MUL1	0.121493	-0.505731	-0.988969	0.278112	0.129243	-0.105635	-0.364741	-0.398813	-0.217484	-0.128484	0.225334	0.21259
MYCBP2	-0.469637	-0.100803	0.0831903	0.39007	0.219138	-0.199824	-0.423754	-0.56028	0.410362	-0.351518	0.472626	-0.00285848
MYLIP	-1.02685	0.554356	0.0387466	0.457448	0.0395276	0.386611	0.501988	0.213138	0.248361	-2.21081	0.287966	-0.854994
NEDD4	0.211961	0.438669	-0.0017131	0.0725046	-0.0489428	0.114402	0.13288	0.016248	0.0957436	-0.600141	0.0168407	0.160369
NEDD4L	-0.127041	-0.133249	-0.0530152	0.172165	0.0971087	0.13419	0.0465706	-0.190917	-0.836773	-0.0491686	0.423162	1.67639
NEURL1	0.237924	-0.134632	-0.125117	0.357807	0.284703	-0.0475831	-0.365869	-0.00198099	0.214264	0.229736	0.0541857	-0.0528066
NEURL1B	-0.347095	-0.0819002	0.00229781	0.110202	0.560239	0.346166	0.370019	0.425521	0.738493	-1.12358	-0.00582374	0.156736
NEURL2	0.24954	0.0215747	0.290674	0.158753	0.0618589	-0.411477	0.106511	-0.0766126	-0.237531	-0.738166	0.274321	-0.197114
NEURL3	-0.432424	-0.0237887	-0.296046	-0.790088	-0.217396	-0.145395	-0.670489	0.0306478	-0.116536	-4.79041	-0.46346	0.0872436
NFX1	-0.425908	-1.43306	0.0899957	-0.152207	-0.465457	-0.262948	-0.282721	-0.885544	-0.0976896	-1.80184	-1.00874	-0.0602909
NFXL1	0.434875	0.413422	-0.110678	0.056939	-0.100329	-0.538301	0.444024	-0.657825	0.343671	0.0195438	0.137802	0.585358
NHLRC1	-0.210408	0.180075	0.633375	-0.113134	0.098463	0.227191	0.0279547	-0.29953	0.0055149	-0.574365	0.761058	-0.18475
NSMCE2	-7.87195	-5.97155	-5.65916	-4.95642	-4.77732	-5.88194	-8.30478	-8.5378	-7.87096	-5.69842	-4.61365	-2.83924
PARK2	-0.366487	0.276148	-0.56271	-0.0948803	0.142313	0.328105	-0.17219	-0.334438	0.176763	0.366083	0.128409	-0.0286405
PCGF1	0.856425	-0.538789	-5.43466	-0.95318	-0.848648	-2.08598	-0.384292	-6.43903	-7.0954	-6.7949	-0.573369	0.0764809
PCGF2	-0.157953	-0.33018	-0.62729	-0.355539	-0.205768	-0.00871066	-0.219528	-0.875923	-1.27736	-0.939129	-0.289719	-1.19076
PCGF3	0.357176	-0.609575	0.214059	0.0438977	0.573457	-0.540606	-0.270114	-0.61927	-0.239532	-1.98317	0.108562	0.477875
PCGF5	0.355997	-0.725634	-0.0602155	0.29687	-0.0484712	0.117866	0.234317	-0.0657601	0.521785	-0.870143	0.401544	-0.058491
PCGF6	0.888833	0.136018	0.558125	-0.51677	0.0830505	-1.03967	0.0469501	-2.87003	-3.02107	-0.216105	0.278384	-0.0198421
PDZRN3	0.29093	0.0731422	-0.266479	-0.191052	0.234192	0.250763	0.17896	-0.0995385	0.466045	1.02728	-0.0409847	0.617877
PDZRN4	-0.8026	-0.568589	0.130081	0.354513	0.20464	-0.329511	-0.0537327	0.274764	0.377218	-2.50062	0.0800363	0.00754058
PEX10	-0.787122	-0.872747	-0.262311	-0.471273	-0.938729	-1.69021	-0.478005	-0.420268	-0.950002	-1.00309	0.115087	-1.32619
PEX12	-0.875313	-1.07603	-0.0831097	-0.396767	-1.46822	-1.68076	-0.632088	-0.343608	-0.413762	-2.83723	-0.470154	-0.193505
PEX2	-1.14798	-0.660828	0.111709	0.289839	-0.737211	-2.07993	0.0581372	-0.588511	-0.446015	-1.16108	0.0433136	-0.253624
PHF7	0.200288	-0.495977	-0.233282	-0.207893	0.165158	0.085515	-0.00648076	-0.0686497	0.312441	0.190405	0.0332334	0.0912397
PHIP	-0.02381	-0.602	-0.35599	-0.764605	-0.962993	-2.58091	-0.652663	-0.278723	-1.62911	-2.9318	-0.19493	-0.235142
PHRF1	-0.407583	-0.182421	-0.623778	-0.253875	-0.305164	-0.0809028	0.0166453	-0.382637	-0.193118	0.0857661	0.281085	0.02389
PIAS1	-1.56693	0.0423953	-1.79884	-0.616051	-1.58795	-1.12899	-0.687291	-1.63439	-1.16046	-1.64654	0.0414873	-0.343528
PIAS2	0.123969	-0.20374	0.333288	0.182953	-0.00546282	0.599042	0.31629	-0.0900902	0.676823	0.709599	0.0450169	0.190656
PIAS3	0.108161	-0.0783265	-0.118228	-0.0521481	-0.0950234	-0.347304	-0.301634	-0.10644	-0.11384	-2.6043	-0.115522	-0.0978549
PIAS4	-1.14121	-0.447276	-3.24074	-0.530451	-0.0551009	-0.594969	-1.07056	-0.0858956	-0.56293	-0.537471	0.250343	-0.288799
PJA1	0.138611	-0.576183	0.302401	0.215303	0.292645	-0.21476	0.360894	0.334971	0.460093	0.757452	0.101722	-0.126068
PJA2	0.237775	-0.316977	0.370602	0.165273	0.146243	0.215298	-0.0646631	-0.280474	0.130747	-0.0283832	-0.276121	-0.0589751
PML	0.63791	-0.0816051	0.622049	0.55987	0.164271	0.224062	0.438208	0.0471282	0.370636	-1.39713	0.302951	-0.138278
PPIL2	-5.30602	-3.57599	-5.69256	-3.55627	-5.02881	-4.64005	-5.79941	-6.70113	-4.32014	-4.49401	-4.77397	-2.69934
PPP1R11	-2.46572	-3.58922	-4.56399	-1.5861	-3.25389	-1.71636	-3.76009	-4.82781	-2.6929	-3.46888	-4.15231	-1.8649
PRAM1	-0.305487	-0.220474	-1.01558	0.084267	-0.360861	0.324446	0.162844	-0.243733	-0.257602	-2.05056	-0.496884	-0.355597
PRPF19	-5.94121	-6.03778	-6.86997	-5.47662	-6.26003	-4.67186	-7.0611	-7.40276	-8.23015	-6.32853	-6.3636	-4.09909
RAB40A	-0.00761291	-0.0188918	0.268959	0.313036	0.152933	0.382299	0.210616	0.889475	-0.128267	-0.960326	0.635958	-0.101974
RAB40AL	0.477107	0.479721	0.257907	0.581088	0.426481	-0.0092483	-0.0644504	-0.231797	0.407146	-0.797146	0.529617	0.00452355
RAB40B	-0.398603	-0.0280553	-0.58749	-0.12804	-0.454891	0.143294	-0.0805061	-0.742241	-0.0347006	-1.22737	-0.00581878	-0.25472
RAB40C	-0.00219738	-0.414186	-0.382124	-0.0733118	-0.181348	0.21503	0.0950617	-0.369611	-0.329634	-0.841118	-0.360301	0.515684
RAD18	-0.0197298	0.20774	-0.161733	0.525783	0.111763	0.429789	0.284361	-0.20295	0.146485	0.43245	0.383528	0.505897
RAG1	0.255138	0.240962	0.0649721	0.101456	-0.00129858	0.151244	0.177213	0.0344275	0.537585	-1.40665	0.357358	0.0839706
RAPSN	0.11463	0.0376155	0.394828	0.0174882	0.0041967	0.0465607	-0.220927	-0.155939	0.0663669	-3.14565	0.0712954	-0.35613
RBBP6	-3.34872	-2.74843	-3.80407	-2.50246	-2.65558	-2.95904	-3.75644	-4.14755	-4.00292	-3.61619	-2.00965	-1.81634
RBCK1	-0.169417	-0.219047	-0.135592	0.153	0.0717505	0.0457754	0.198703	0.385249	-0.497731	-1.74908	-0.294943	-0.821159
RBX1	-6.64265	-4.3822	-5.65985	-2.98883	-5.73309	-5.13179	-6.71726	-6.743	-7.49224	-5.44268	-6.08332	-3.47779
RC3H1	-1.7732	-0.458315	-1.573	-0.69599	-1.07696	-0.924346	-0.106398	-1.79867	-0.928409	-0.793443	0.0243671	0.251778
RC3H2	0.240102	0.0925989	0.219198	0.480243	0.214428	0.109113	0.355905	0.151323	0.408073	0.260682	0.345363	0.0152383
RCHY1	0.413088	0.713393	0.193079	0.225855	0.0980369	0.370131	0.351781	0.34041	0.204331	0.292656	0.199262	0.257987
RFFL	0.183751	0.200663	0.296003	0.315245	0.119483	0.429946	0.175194	-0.465529	0.132662	-0.700021	0.292927	0.22798
RFPL1	-0.264179	-0.047213	-0.358157	-0.186305	-0.00716753	-0.156138	-0.0371064	-0.369203	0.172244	-1.22171	-0.167479	0.116974
RFPL2	-0.355916	-0.35927	-0.646636	-0.717975	-0.60785	-1.30536	-0.341695	-0.453818	-0.283374	-1.85329	-0.485354	0.0953718
RFPL3	-0.520848	-0.359067	-0.826828	-0.310711	-0.478389	-0.350266	0.0434131	-0.794615	0.210362	-1.25556	-0.526666	-0.213746
RFPL4A	-1.1489	-0.38356	-0.45649	-0.102462	0.274989	0.246186	0.16322	-0.368167	0.276408	-1.41641	-0.199979	0.156967
RFPL4B	-0.0215782	0.0240483	0.202005	0.137755	0.380985	0.219886	-0.00239123	-0.304909	0.142331	0.314957	-0.0102002	0.302734
RFWD2	-2.48816	-1.93463	0.092281	-2.15828	-1.70696	-1.40831	0.342362	-0.160222	0.118558	-0.0127249	-4.54579	-2.10353
RFWD3	-4.93362	-4.17434	-5.97547	-3.95202	-3.01356	-3.43747	-1.20058	-1.06348	-0.37293	-2.89872	0.274728	-0.294048
RING1	0.460786	-0.837591	0.100679	-0.194591	-0.0111291	-2.39456	-0.109064	-0.792472	0.314407	-1.58778	-0.114677	0.124811
RLIM	0.61337	-0.235253	-1.41748	-0.204011	-0.0589706	-1.03397	0.498273	0.516708	-1.14102	-1.36805	0.189573	-0.0888386
RNF10	0.0864953	-0.1374	-0.292991	0.0492402	0.12478	0.0330381	-0.190245	-0.213544	0.0285017	-0.223308	-0.562944	-0.231335
RNF103	0.430195	0.15038	0.527247	0.143337	0.0958396	0.156149	0.467638	0.183387	0.283255	-1.33385	-0.0702087	0.497219
RNF11	0.361725	0.166526	0.382494	-0.00676517	-0.0670647	0.0289143	0.266375	-0.148393	-1.66845	-0.668538	0.181831	-0.13731
RNF111	0.18	0.121296	0.6682	-0.542514	0.210672	0.245682	-0.100244	-0.711203	0.178514	-0.342113	0.147848	1.1912
RNF112	0.103088	0.358834	0.0649377	0.434156	0.416992	0.529506	-0.0619484	-0.198807	0.0810028	0.549963	0.240487	0.045302
RNF113A	-2.13	-2.35529	-2.0406	-2.94079	-3.1779	-2.27757	-4.19791	-1.86283	-2.4724	-2.37579	-1.77032	-0.949932
RNF113B	0.0590126	0.220959	0.0365254	0.467956	0.0621357	-0.254139	0.126794	-0.710497	-0.345249	-0.561469	-0.204195	0.0802066
RNF114	-0.100901	-0.773302	0.173198	-0.017129	-0.0599151	-0.205843	0.0572596	-0.561003	-0.124732	-4.06074	-0.148974	-0.513298
RNF115	0.604028	-0.31066	0.372409	0.263708	-0.00955418	-0.415524	0.491927	-0.0202287	0.256218	-0.044036	0.386489	0.362947
RNF121	0.00933305	-0.890156	-0.0350517	-0.164664	-0.0235778	0.175029	-0.280057	-0.479288	-0.221131	0.106105	0.0305677	-0.636601
RNF122	-0.0810109	-0.388384	0.22589	0.00285847	0.569076	0.226422	0.213781	-0.203181	0.0380574	-0.528582	0.333457	0.24693
RNF123	-0.489559	-0.509931	-0.0455658	-0.398304	-0.16224	-0.656473	-0.281862	-1.01959	0.0314847	-0.576205	-0.383497	0.0131169
RNF125	0.233002	0.223453	0.182953	0.22085	0.148481	0.19292	-0.156731	-0.116896	0.782829	0.447766	0.02774	0.111254
RNF126	0.847758	0.19423	-0.16155	-0.553546	0.144711	-1.3659	0.107344	-0.312484	-0.259342	0.969037	0.251317	-0.221617
RNF128	0.525631	0.302553	0.482297	0.18526	0.441705	0.222893	0.10007	-0.0075254	0.318836	-0.0612935	0.514832	0.0648741
RNF13	-0.0159285	-0.125896	0.318389	0.369554	0.276828	0.604574	0.235151	0.0101465	0.415403	0.149311	0.479187	0.26734
RNF130	0.19516	-0.0628205	0.673093	0.166286	0.181162	0.381566	0.112542	-0.273113	0.454735	-1.03115	0.179113	-0.111646
RNF133	0.100613	0.377507	0.174152	-0.0770915	0.292392	0.281378	0.412702	-0.0716431	0.0376127	0.283808	0.390661	0.218909
RNF135	-0.281545	-0.447936	0.0271761	-0.0223389	0.140959	0.261359	-0.174161	-0.105332	-0.259249	-2.44472	0.0294847	0.0846139
RNF138	0.618121	0.045792	0.352489	0.185687	0.360093	0.0833665	0.167089	0.130016	0.444476	-0.554261	0.153661	0.271648
RNF139	-0.99912	-0.566577	-0.403131	0.384124	-0.231359	-0.0788351	0.146786	0.0282127	-2.54494	-0.0108485	-0.00691446	-0.0758649
RNF14	-0.14603	0.08585	-0.749561	-0.017368	0.0344135	-0.040047	0.0940244	-0.169635	-0.239704	-0.370053	-0.831779	-0.175312
RNF141	0.0335441	-0.0200859	-0.11607	0.599175	0.420233	0.0837466	0.0545417	0.234544	0.457746	0.396435	0.117424	0.534659
RNF144A	0.385967	0.337298	0.298333	0.11575	-0.0907164	0.0666796	0.363699	0.0996906	0.381989	-1.20589	0.380605	0.0899162
RNF144B	0.320446	-0.0350713	-0.0593796	0.305157	0.128514	-0.0500776	0.139251	0.229999	-0.0771683	-0.701685	0.349684	0.14955
RNF145	-0.433725	0.405568	0.401966	0.408199	-0.0843688	0.229377	-0.374137	-0.446781	-0.528334	-0.29408	0.197431	-0.05416
RNF146	0.126442	0.48846	0.22986	0.358477	-0.143351	0.445694	0.148439	-0.264268	-0.767817	0.979468	0.00472734	0.42903
RNF148	0.0930488	0.202632	0.107023	0.318357	0.301972	-0.0338976	0.346712	-0.113604	0.217678	0.525785	-0.0364021	0.0937086
RNF149	0.373043	0.0633206	-0.0774317	0.000542227	0.294284	0.0153105	0.139427	-0.268943	0.0601816	-0.412888	0.530606	0.0915894
RNF150	0.251104	-0.263666	0.0496544	0.0950895	0.251026	0.0672661	0.241711	-0.143854	0.224574	0.0100517	0.103624	0.198161
RNF151	-0.287278	-0.832072	-0.478522	-0.290672	-0.090845	-0.0815613	0.125073	-0.2137	-0.308013	-0.000206755	-0.129355	-0.162336
RNF152	-0.108976	0.350554	-0.0372518	0.234222	-0.0945696	0.119155	0.376132	-0.059984	0.0949514	-0.0981835	0.259462	-0.0305705
RNF157	-0.225439	-0.108985	0.32135	0.21253	-0.371395	-0.467396	-0.142726	-0.0138034	0.508023	-1.28612	-0.252355	-0.650422
RNF165	0.0475355	-0.454405	0.299629	0.113167	0.218042	0.360949	0.181117	0.19034	1.01433	0.617199	-0.00569269	0.0179698
RNF166	-0.742362	-1.33733	-0.628088	0.316216	-1.43686	-1.03839	0.136204	-0.827165	0.106305	-3.5194	-0.429258	-1.38134
RNF167	0.326277	0.0616306	0.293464	0.0916126	0.402082	0.00963077	0.138718	-0.172432	0.274818	-0.299664	-0.0282488	0.572775
RNF168	-1.75394	-5.27564	-6.73782	-0.434241	-1.5229	-2.6522	-4.17831	-5.52249	-4.80235	-7.90394	-1.12195	-2.28964
RNF17	0.302098	-0.0764972	0.178179	0.228871	-0.121842	0.344845	0.204771	-0.0424752	0.813716	-0.123469	0.184034	0.0688175
RNF170	-1.42159	0.0255115	0.273321	0.025653	0.0828795	0.460702	0.354139	-0.442369	0.153501	-2.25799	0.35358	0.135063
RNF175	0.0435342	-0.071348	0.403881	0.327687	0.303057	0.234326	-0.180992	0.0641045	0.482936	-0.403048	0.146852	0.260043
RNF180	-0.327533	-0.262833	0.159225	0.0302882	0.0958221	0.0313347	0.255107	0.0156813	0.406679	-1.70403	0.480484	-0.450338
RNF181	-0.1865	-0.065114	-0.547667	0.0126129	-0.27942	0.124701	0.0872078	0.361241	-0.484525	-1.24805	0.333473	0.0421222
RNF182	-0.0157378	0.103843	0.258449	0.119199	0.133863	0.176406	0.176614	-0.163449	-0.0304572	0.233084	0.314365	-0.0494574
RNF183	-0.12102	-0.139955	-0.0655669	0.095497	0.0919142	-0.227002	-0.0916908	-0.224492	0.20825	-0.975677	-0.0551622	0.11688
RNF185	0.182059	-0.105914	-0.310239	-0.27201	-0.129626	-0.0162562	0.109613	-0.140516	0.547371	0.235015	0.031299	0.158207
RNF186	0.460577	0.237557	0.374552	0.251395	0.157042	-0.0914528	-0.241975	0.10063	0.159333	-0.385417	0.287625	0.148135
RNF187	-0.158576	-0.746924	-0.44977	-0.306303	0.0278277	0.146372	-0.0448329	-1.01379	-0.293692	-3.22525	-0.358147	-0.154616
RNF19A	-0.715036	0.0409538	-0.497831	0.20513	0.400682	-0.139896	0.277567	-0.506697	-0.912173	0.0696455	0.0349655	0.242943
RNF19B	-0.199903	-0.575748	0.427392	-0.101281	-0.116195	-0.345542	-0.372122	-1.18164	0.241727	-0.26836	-0.0774218	0.00909307
RNF2	0.39804	-0.273813	-0.0423719	0.0460131	0.00338532	-0.127006	-0.252614	0.314836	0.0525273	-0.0163654	-0.0398138	0.359739
RNF20	-2.38948	-0.841193	-2.50809	-1.82942	-2.91313	-2.1629	-4.02716	-2.40153	-5.74789	-5.83365	-2.2906	-1.57138
RNF207	-0.536943	-0.0190126	-0.789267	0.163257	-0.107624	-0.41877	-0.0684412	0.0111743	-0.411113	-0.905643	-0.157758	-0.212937
RNF208	0.306047	-0.497645	0.229118	-0.187581	-0.349473	-0.301848	-0.291893	0.361469	0.325427	-2.23085	-0.0210004	0.0365398
RNF212	-0.0379279	-1.03727	-0.837788	-0.386032	0.0165929	-0.257723	0.0766014	-0.208406	-0.495903	-0.284783	-0.128978	-0.455529
RNF212B	0.165576	-0.290453	-0.561221	-0.158425	-0.0324412	-0.350823	0.197273	-2.6774	0.566764	-0.243995	0.0140428	-0.11207
RNF213	0.114761	0.129405	-0.106856	0.263855	0.469033	-0.454621	0.230149	-0.364733	0.341258	0.00238578	0.0185327	-0.308479
RNF214	0.38511	0.890216	-0.483647	0.674385	0.0179207	0.254482	-0.276794	-0.219493	-0.248141	0.414424	0.109117	-0.931445
RNF215	0.0407193	-0.260359	0.075729	0.220501	0.129097	-0.0523446	-0.278565	-1.16298	0.00378917	-1.03694	0.349787	0.21688
RNF216	0.305671	-0.207154	0.266423	0.564117	0.187706	-0.662813	-0.249372	0.655819	-0.648962	-0.388692	0.305264	0.48311
RNF217	-0.0305805	0.559008	0.327951	0.244998	0.341988	0.215169	0.465017	-0.301824	0.384724	0.459719	0.32306	-0.561103
RNF219	-0.579814	0.146713	-0.23099	0.400058	-0.161243	0.32266	0.666913	0.0431076	0.355183	1.07974	0.121064	0.369282
RNF220	0.424642	0.0232108	-0.076928	-0.576459	-0.258927	-1.30045	-1.40597	-2.42466	-0.45718	-3.88786	-0.294768	-0.271175
RNF222	-0.191286	-0.329907	-0.146572	-0.0925022	0.0844127	-0.136078	-0.345538	-0.0734222	0.446368	-1.11841	0.0351311	0.191838
RNF223	-0.179617	-0.853018	-0.814899	-0.322725	0.147549	-0.242431	-0.17609	-0.386493	-1.83379	-1.43316	-0.392887	-0.474512
RNF224	0.18692	-1.69055	-0.072255	0.000998825	-0.360731	-0.241055	-0.349409	0.313335	0.402304	0.361358	-0.219064	0.488466
RNF225	-0.46003	0.395782	-1.22681	-0.115845	0.249622	-0.227617	-0.0560355	-0.0649095	-0.507908	-3.48248	0.135144	0.17176
RNF24	-0.630372	-0.640911	-0.710018	0.174033	-0.309006	-0.0774878	0.0449643	0.257587	0.339114	0.0779736	0.21879	0.124748
RNF25	0.320973	0.164311	0.180418	-0.140509	-0.0831044	-0.166211	-0.725369	-0.811412	-0.137186	-1.42135	0.291016	-0.636912
RNF26	0.222702	-0.691844	0.135471	0.116811	-0.395442	0.00149446	0.0185918	-0.169024	-0.208015	-1.79957	0.0751631	0.135634
RNF31	-0.154663	-1.38384	-0.226006	-0.923324	-1.07805	-2.77223	-0.172442	-0.0620567	-4.66912	-2.00728	-0.194661	-1.56458
RNF32	0.106672	-0.10289	0.619857	0.144354	0.0888775	-0.111329	0.340067	0.201868	0.15202	0.349737	0.506644	0.125646
RNF34	-0.0220161	-0.464932	-0.084945	0.0230745	-0.290796	-0.158596	0.15653	-1.0656	0.39615	-0.962467	0.372984	-0.344987
RNF38	-0.163353	0.61295	0.225342	-0.0667758	0.053157	-0.067093	-0.00678521	-0.00576022	0.505867	-0.841266	-0.854724	0.194774
RNF39	-0.735314	-0.725213	0.0344597	-0.285649	0.30816	0.0804495	-1.08047	-0.264472	-0.320217	-0.194715	-1.04603	-0.242633
RNF4	-4.52496	-4.61886	-2.71166	-2.51544	-0.60155	-4.30553	-6.838	-5.29195	-5.08877	-2.01726	-3.67848	-3.75051
RNF40	-3.07064	-3.91344	-3.55614	-3.41993	-4.24841	-2.71853	-4.55778	-3.12338	-2.72527	-5.12259	-3.76191	-1.65235
RNF41	0.207582	-0.141359	-0.120225	0.0183144	-0.112954	-0.187702	0.0710865	0.288053	0.959026	-1.88294	-1.99918	0.11124
RNF43	0.000435584	0.104012	-0.0169261	-0.0748388	0.17625	0.253962	0.103821	0.453074	-0.364263	-1.49207	1.46126	-0.601502
RNF44	0.201211	-0.448495	0.0219094	-0.0526786	0.251294	0.287776	0.130415	-0.386158	-0.467627	-1.92031	-0.764171	-0.369875
RNF5	-0.286401	-0.535751	0.0737382	0.0840302	0.243583	0.233979	0.0698128	0.101153	-0.0826639	-5.47301	0.304426	-0.112793
RNF6	-0.0683472	-0.792909	-0.0301402	0.402467	-0.160762	-0.215252	0.222534	-0.403935	0.202746	-0.339101	0.146495	0.172774
RNF7	0.383742	0.619013	-0.215843	0.716403	0.887478	-0.170294	0.475662	-0.727882	-0.0257922	1.32505	0.908326	1.99788
RNF8	-2.4583	-1.79162	-5.56026	-0.0868895	-1.23225	-2.25886	-3.81851	-2.40517	-1.28292	-4.52653	-0.874663	-1.01279
RNFT1	0.211619	-0.117452	0.107294	0.265497	0.344803	0.166484	0.219545	0.0476492	0.0789752	-0.678437	0.414101	-0.185099
RNFT2	-0.0668184	0.131385	0.152069	0.49054	0.180011	-0.62605	-0.0682499	0.211398	0.0929553	-0.540152	-0.0328467	-0.118559
RSPRY1	0.167858	0.0242974	0.488605	0.194423	-0.192382	0.121863	0.364559	0.255247	0.206123	-0.462213	0.770036	0.478643
SCAF11	-0.0498024	0.161385	0.0372509	-0.0913627	-0.128057	0.451739	0.160606	-0.331419	-0.102923	-0.12382	0.378561	-0.0974914
sgRNA	MOLM-13	NOMO-1	MV4-11	SEM	HEL	KASUMI	NCI-1048	NCI-H82	NIC-H211	DMS114	AsPC-1	CFPAC-1
SH3RF1	0.491944	-0.0792935	0.527157	0.356378	0.143683	0.27798	0.508422	0.380258	0.816035	-0.457797	0.61635	0.360338
SH3RF2	0.22784	0.380737	0.260503	0.329402	0.177235	-0.161207	0.399865	0.0697504	0.766642	-0.664298	0.728273	0.380415
SH3RF3	-0.114184	-0.0747707	0.20318	0.243338	0.281777	-0.322976	0.345895	-0.884777	0.110091	-1.89656	-0.212374	0.129173
SHPRH	0.037047	-0.0392872	-0.00835043	0.484874	0.396772	0.179537	0.293204	-0.552814	-0.0436941	0.376896	0.389276	-0.119962
SIAH1	-0.889676	0.84523	-2.19369	0.0370253	0.276985	0.140241	0.934536	-0.19186	0.353354	-0.498071	0.00280218	0.381336
SIAH2	-0.106277	0.901555	-1.37616	0.247178	-0.104999	-0.270887	0.216059	0.133424	0.438637	-0.125561	0.211863	-0.402967
SKP1	-6.63609	-4.41301	-3.77471	-2.33015	-5.00085	-3.32779	-4.49107	-5.86044	-4.95474	-2.24954	-5.3851	-2.26941
SKP2	-2.79358	-0.760371	-2.1458	-1.3179	-0.241759	-1.16429	-4.36782	-1.5593	-5.47436	-2.66091	-1.71666	-0.671602
SMURF1	0.262687	-0.359919	-0.0274848	-0.465544	-0.327916	-0.0845538	0.43499	-0.152814	-0.21804	-2.83413	-0.613622	0.245341
SMURF2	-0.293872	-0.560689	-0.00682194	-0.238061	-0.186017	-0.0722826	0.165053	-0.59332	-1.35538	-0.555825	0.459058	-0.549055
SOCS1	0.239051	-0.979433	-0.129069	0.188703	0.0340697	0.333106	0.508372	0.365174	0.217373	-1.26154	-0.943892	0.135251
SOCS2	0.245281	-0.477783	0.34713	0.211756	-0.200112	0.22045	0.00499155	0.143773	0.345072	0.780665	0.222395	-0.178464
SOCS3	0.0191561	-0.0850163	0.0316102	0.104614	-0.0560338	-0.400235	-0.118466	-0.465492	0.370374	-1.03803	-0.189705	1.15971
SOCS4	0.213331	0.0098931	-0.0959959	0.280007	0.0657991	-0.170808	0.184973	0.107862	-0.130905	-0.414468	-0.123795	-0.113249
SOCS5	0.116535	0.0293563	0.498243	0.560585	0.189441	0.0291987	0.35559	0.0317597	0.120278	-1.35839	-0.0145471	0.330508
SOCS6	0.298881	-0.386078	0.0591474	-0.0752492	0.219096	-0.264171	0.292549	0.0380751	-0.404506	0.668189	0.788496	0.183205
SOCS7	0.0462372	-0.0775847	0.0110334	0.0567959	-0.0208653	0.228252	-0.0363271	-0.068365	-0.385604	-1.33561	0.210079	-1.38115
SPSB1	0.418739	-0.331367	0.390837	-0.064102	0.484557	-0.132107	-0.0484778	0.0872573	0.211167	-0.578284	0.286014	0.0984775
SPSB2	-0.164357	0.0308341	0.12882	-0.392535	0.194968	-0.0302889	0.0545777	-0.887592	0.132422	-0.360148	0.183306	0.207176
SPSB3	-0.257744	0.158813	-0.824916	-0.522102	0.0610519	-0.191882	0.227217	-0.639801	-0.31627	0.063237	-0.0481452	0.151941
SPSB4	0.194427	-0.121201	0.250029	-0.0111968	0.0747781	0.345289	0.307144	0.0638206	-0.408259	0.00251936	0.182534	0.377861
STUB1	-0.517978	-1.28689	-0.548801	-0.915014	0.0325286	-0.904	-0.246262	-1.50582	-1.23809	-0.639332	-0.465473	-0.883964
SYVN1	-0.261413	-2.40812	-2.49992	-3.78678	-4.25262	-2.11479	-2.00464	-2.61299	-4.9975	-1.92035	-1.67886	-2.57806
TBL1X	0.337626	-0.0796301	0.379068	0.0570184	0.067937	0.497001	0.324251	0.183325	0.43417	0.601012	0.525172	0.279151
TBL1XR1	-2.12262	-2.61853	-1.28933	-3.25143	-0.913634	-1.00597	0.745054	-2.34951	-7.18719	0.664241	-1.36892	-1.59813
TBL1Y	0.478392	0.687821	0.520449	0.772726	0.347454	0.710515	0.685023	0.372469	0.248807	0.672944	0.44545	0.772042
TIP60	-7.04029	-4.55946	-7.27323	-6.16889	-6.33525	-8.54571	-5.64564	-8.02116	-9.65947	-8.0715	-6.21254	-4.4334
TMEM129	-0.154594	-0.498992	0.295113	-0.0184251	0.0465724	0.304226	-0.164993	0.477675	0.333419	0.137539	0.0833991	0.275501
TOPORS	0.984848	0.500687	0.010852	0.0505537	-1.59452	0.168495	0.117304	-0.21247	0.501856	-0.17419	-0.172839	0.399901
TRAF2	-0.633054	-3.45709	-0.504851	-1.87435	-0.54084	-3.9165	-1.12966	0.119958	-2.43014	-3.34159	-2.48396	-3.66452
TRAF3	0.0791074	-0.119172	-0.107092	-0.527939	0.197801	0.523834	0.373107	-0.135449	0.458992	-0.224683	-0.586168	-2.44758
TRAF4	-0.254643	-0.200948	0.20901	0.129136	0.130218	0.0440187	0.0131381	-0.47161	-0.159654	-1.28767	-0.365654	-0.263419
TRAF5	0.204812	0.273567	0.38647	0.305827	0.19653	0.581423	0.195035	0.0396114	-0.111454	0.308941	0.20792	0.371371
TRAF6	0.303554	-0.14957	0.174404	0.0326835	0.0862123	0.0328645	0.180487	-0.341149	0.156292	-1.02919	0.473309	-0.191296
TRAF7	0.123643	-0.325144	-0.183982	0.398032	0.107158	-0.361901	0.501624	-0.366937	0.0890204	-0.1829	-1.92121	-0.231731
TRAIP	-5.72236	-4.95796	-6.22804	-3.1639	-3.71507	-3.35799	-6.14365	-2.33376	-4.68515	-5.39848	-2.07231	-4.64706
TRIM10	-0.559652	-0.43288	0.541614	0.288986	-0.0572614	-0.517623	-0.00785906	-0.764215	0.414946	-0.955396	0.2237	-0.162852
TRIM11	-0.0478803	0.164225	0.633491	-0.467346	-0.0409408	0.0353908	0.273207	-0.0758236	-0.150249	-0.548137	-1.12834	0.827095
TRIM13	-0.20276	-0.137074	0.270016	0.240152	-0.0648122	-0.167687	0.285595	-0.0719137	0.358617	-0.285304	0.234619	-0.183321
TRIM14	-0.0906909	-0.286526	-0.262843	0.296942	0.62888	-0.117067	0.229891	0.187924	0.0108378	-1.41178	0.174805	0.319059
TRIM15	-0.0786053	0.0267512	-0.265687	-0.255911	-0.163941	-0.145012	-0.305366	-0.834462	-0.121246	-3.17642	-0.00703988	-0.385485
TRIM16	-0.0707555	-0.183477	-0.37765	-0.0337374	0.0163253	0.0518965	0.0235424	0.0784435	0.406916	-0.0805495	0.167884	-0.220713
TRIM17	-0.0560374	-0.416573	0.0102949	0.404177	-0.0226112	0.383413	0.310477	0.0629923	-0.423897	-0.268541	-0.0342319	-0.0198046
TRIM2	0.350286	-0.313386	-0.121487	0.0107504	0.197222	-0.0424372	0.360176	-0.603727	0.245429	-0.579912	0.0274804	-0.0138219
TRIM21	0.0828853	0.277776	0.135044	0.211988	0.44184	0.096667	0.0882261	-0.00977419	0.234922	-0.217315	0.247763	0.115204
TRIM22	0.281926	-0.114513	-0.00528991	0.0804501	-0.0236159	0.381359	-0.0271368	-0.225212	0.128856	0.0284455	-0.0775541	-0.110565
TRIM23	-0.075341	-0.381904	-0.0156801	0.180345	0.0140301	-0.126518	-0.12546	-0.119157	0.400651	-0.0761438	0.00989883	-0.0158627
TRIM24	-3.31889	-0.202372	-0.270114	0.623289	0.365674	1.18038	-0.505863	0.215689	-1.26386	-3.53754	0.441298	0.0172053
TRIM25	-0.308905	-0.11919	-0.156528	0.146316	-0.186214	0.678781	0.244759	-0.424402	-0.171271	-1.45506	0.155253	-0.0813551
TRIM26	-0.145809	-0.394429	-0.115042	-0.0761155	-0.00932975	-0.117524	-0.133036	-0.465859	0.169698	0.0164121	0.157761	-0.222592
TRIM27	-0.442371	-0.161514	0.36721	0.00235781	-0.363966	0.458598	0.0962801	-1.41448	-0.374081	-0.530045	0.564645	-0.310965
TRIM28	-2.76176	-3.71776	-5.71692	-0.940424	-0.668326	-3.0095	-1.30959	-0.131925	-2.3483	-5.86696	-0.147275	-1.97664
TRIM3	0.129841	0.309347	-0.0442659	0.0820302	0.23072	0.230115	0.118215	0.274466	-0.11687	-0.00813386	0.0154921	0.241222
TRIM31	0.416516	0.151771	0.415332	0.340053	0.146305	0.279543	0.0320573	0.297103	0.363009	0.207993	0.0963397	0.112323
TRIM32	0.211969	-0.189272	0.278776	-0.010636	0.219456	0.179282	0.0870313	0.143558	-0.243844	0.326574	0.16433	0.13587
TRIM33	-1.8668	0.189368	-0.523845	-0.357977	-0.0152821	0.297246	-0.971957	-0.501448	-5.12541	-3.47958	-0.3049	0.186946
TRIM34	0.142937	0.0346019	0.218883	0.336183	0.251977	0.205113	0.310781	0.297588	0.367132	-0.340034	0.102649	0.0870115
TRIM35	-0.372088	-1.80719	-1.17896	0.361377	0.851589	0.52548	0.202317	-0.189045	0.328624	-0.320165	0.559596	0.536919
TRIM36	0.318876	0.371236	0.00461066	0.21416	0.22933	0.0946141	0.386031	0.305231	0.329628	0.356307	0.357878	0.220028
TRIM37	-0.221296	-0.22972	0.00901047	-0.0428457	-3.08545	-4.48701	-3.05426	-1.75367	-0.591734	-6.85381	-0.546909	-1.87692
TRIM38	-0.163621	0.391287	0.640114	0.508314	0.0872122	0.412635	0.0936091	0.404678	0.216407	-0.746896	0.0722579	0.124586
TRIM39	-0.179249	0.515875	-0.009477	0.0656651	0.0410229	0.0766471	0.445381	-0.281632	0.046846	0.0763798	0.28859	-0.213104
TRIM4	0.278255	-0.802712	0.122735	0.268268	0.46837	0.146506	0.103413	0.000698791	0.231502	-1.56504	0.10791	0.625029
TRIM40	-0.0591881	0.42887	0.41021	0.206547	0.214407	0.12182	-0.0930908	0.0308659	0.135864	-1.51317	0.220915	-0.0904789
TRIM41	0.346475	-0.268524	0.153052	-0.289744	0.0885428	-0.262277	-0.0235642	0.239785	-0.0691161	-0.778402	-0.215879	-0.258335
TRIM42	0.3679	-0.713582	0.107821	-0.00150755	0.276206	-0.135378	0.0818854	-0.575294	0.390447	0.00733985	-0.323404	-0.383395
TRIM43	-0.646742	-0.615745	-0.924536	-0.513348	-0.178485	-0.642317	0.12098	-0.595442	-0.498911	-3.32007	-0.728018	-0.126721
TRIM44	0.11646	0.300553	-0.0364758	0.279879	0.292733	0.168876	-0.188744	-0.0395845	0.771964	-0.195159	0.283099	0.261294
TRIM45	-0.245726	-0.245372	-0.310321	0.172654	-0.408695	-0.48418	-0.193782	-0.121808	0.0960906	-1.96119	0.0580567	-0.056869
TRIM46	-0.482061	-0.186069	-0.0941525	0.122858	0.0417194	-0.304782	-0.104567	0.184997	0.38996	-1.38794	-0.157876	-0.0576493
TRIM47	0.0404907	-0.504091	-0.772631	0.0872394	-0.383636	-0.0322532	-0.373304	-0.0596361	0.249592	-1.22934	-0.527095	-0.418546
TRIM48	-1.03239	-0.196752	-1.261	-2.80723	0.132462	-0.0213483	-1.01727	-0.81623	-1.72712	-0.811702	-2.74079	-0.536419
TRIM49	-3.25246	-2.22494	-4.54954	-1.86279	-1.08204	-1.70569	-2.09191	-1.34595	-3.88569	-4.4144	-2.14144	-0.442697
TRIM49B	-2.19515	-1.35277	-2.49607	-1.39871	-0.853977	-1.11888	-1.32978	-1.90539	-2.56313	-2.19409	-1.088	-1.2215
TRIM49D1	-2.40225	-1.61076	-3.70601	-1.38978	-2.00563	-0.406934	-1.34682	-1.55486	-2.83867	-2.25607	-2.37516	-1.74753
TRIM5	0.253115	0.299957	0.393656	0.254486	0.0142977	0.260926	0.620773	0.00226283	0.5953	-0.450108	0.0382939	0.369012
TRIM50	0.109515	-0.385642	0.186583	-0.15847	0.251558	0.507817	-0.0823682	0.247335	0.232346	-2.73297	0.375363	0.35987
TRIM51	0.0493838	-0.307129	-0.732384	-0.777683	0.352049	0.210899	-1.29711	-0.271352	-2.08403	0.0369738	-0.596207	0.311707
TRIM52	-0.221338	-0.175046	-0.342137	0.00318016	0.20785	0.186659	-0.0960364	-0.343253	0.286995	-0.42269	-0.0678011	-0.0387496
TRIM54	0.139528	-0.257416	0.345338	-0.259922	0.127719	-0.127978	-0.0412994	-0.242947	-0.499752	-0.63413	-0.187387	0.102805
TRIM55	-0.873797	-0.602165	-0.535491	0.00348495	0.169268	0.146085	-0.139206	-0.0592715	0.422704	0.296588	0.109233	-0.0561847
TRIM56	0.0044761	-1.02847	0.651532	-0.00232268	0.0965276	0.253577	0.0963102	0.448542	0.279094	-1.1115	0.242536	0.0668478
TRIM58	0.346635	0.176761	-0.282502	0.302846	0.174309	0.165706	0.0254292	0.356642	-0.623646	-0.592363	0.133585	-0.152581
TRIM59	0.287265	0.0200442	0.282524	0.170501	0.246267	0.209253	0.160543	-0.600847	0.475456	0.680163	0.133609	-0.0727625
TRIM6	0.518745	-0.0767403	0.148789	0.285422	0.29935	0.297983	0.191424	0.116316	0.250837	0.24247	0.112855	0.0955115
TRIM6-TRIM34	0.0850342	0.976262	0.113537	0.483239	0.120526	0.131349	1.04079	0.9865	0.29671	-0.701919	0.852492	0.467305
TRIM60	0.13953	0.124501	0.0919585	0.253846	0.56335	0.0779432	0.346275	-0.00602689	0.0761056	0.59395	0.308538	0.532589
TRIM61	-0.0882359	0.408856	-0.23098	0.0454371	0.00126666	-0.769733	0.197746	-1.20715	0.12907	-0.536654	-0.403356	0.329535
TRIM62	0.252017	0.112338	0.291061	0.50829	0.44091	-0.492517	0.101168	-0.126109	0.217845	-0.24841	0.221307	-0.195734
TRIM63	0.248228	-0.224091	0.110161	0.156592	-0.313504	0.00332695	0.413337	0.446589	0.394334	0.350044	0.416876	-0.56518
TRIM64	-1.24784	-1.10338	-0.538081	-0.45003	-0.153397	0.530334	-0.168519	-0.576956	-4.13264	-1.49578	-0.107213	0.255508
TRIM64B	-1.29349	-0.390583	-1.0106	-1.94092	-1.21391	-0.396597	-1.75585	-3.90762	-8.65654	-3.97526	-3.83382	0.0442336
TRIM64C	-0.219219	-0.376539	-0.00808787	-0.594671	0.156225	-0.268775	0.00333871	0.366726	-2.28089	-1.07231	-0.273726	0.277169
TRIM65	-0.199211	-0.439898	-0.350474	-0.219723	-0.0242219	-0.41962	-0.431888	0.0427305	-0.275467	-2.20421	-0.226582	-0.369082
TRIM67	0.358884	0.181868	0.541897	0.109741	0.462342	0.235838	0.0848839	-0.472853	0.28102	-0.835824	0.210895	-0.140626
TRIM68	0.0491789	-0.192877	0.0340015	-0.00896696	-0.171624	-0.0982073	0.200022	0.032459	0.209136	-0.0516955	-0.0237506	0.414369
TRIM69	0.465674	-0.053693	0.251421	-0.106274	0.0347989	0.377167	0.0688383	0.432744	0.340866	-0.739522	0.131175	0.201649
TRIM7	-0.204208	-0.558063	0.503855	-0.211789	0.392251	0.212522	0.119059	0.430184	-0.118037	-2.0636	0.503404	-0.00357184
TRIM71	0.360927	0.34435	-0.365911	0.655482	0.306692	0.690901	0.371163	-0.0796022	0.338306	0.00168469	0.150637	-0.0233249
TRIM72	-0.209853	0.320359	0.062266	0.12236	-0.00760736	0.0940736	0.229807	-0.306515	-0.441542	-1.53728	0.25861	-0.213778
TRIM73	-1.24223	-3.49836	-0.654443	-0.336472	-0.738158	-1.90908	-0.511381	-0.669057	-1.13823	-2.35305	-0.369299	-0.757005
TRIM77	0.358715	0.813414	0.110709	0.391575	0.578838	0.341221	0.62502	0.109271	0.47052	0.232155	0.139058	0.359965
TRIM8	0.205992	-0.00403262	0.0544451	-0.282179	-0.00905354	-0.559809	0.141414	0.221304	0.798986	-1.03142	-0.140078	0.89644
TRIM9	0.257673	0.0758804	0.174129	0.28184	0.321528	-0.778392	-0.164771	0.0227815	0.0726672	0.374355	-0.0020318	-0.0619179
TRIML1	0.193919	0.384532	0.310048	0.25185	0.569345	-0.0539968	0.299223	0.381167	0.294954	-1.41993	0.483116	0.351584
TRIP12	-2.63087	-1.31045	-4.96006	-1.65162	-1.56122	-0.851405	-0.575264	-2.05998	-1.64697	-1.39143	-0.817691	-0.757854
TTC3	0.345107	0.129017	0.271063	0.232678	-0.154937	0.13468	0.147183	0.127246	0.00801125	0.815941	0.108791	0.0310713
TTF2	-5.99443	-5.27344	-8.37394	-5.22679	-5.11155	-6.51476	-7.62058	-9.04603	-4.61468	-8.61872	-5.57813	-4.17862
TULP4	0.124796	0.440819	0.223924	0.0596052	0.189417	0.123972	0.142979	-0.454387	0.448846	-0.293441	0.315651	-0.149973
UBA52	-6.62306	-5.07196	-4.70589	-1.91253	-3.84404	-3.94673	-4.30755	-4.21691	-6.24202	-4.1874	-4.87071	-3.03574
UBB	-1.17158	-0.685008	-1.224	-2.80434	-0.914454	-0.48954	-1.30774	-3.40541	-0.882359	-0.431626	-3.15819	-1.03547
UBC	-1.03557	-1.70896	-0.379912	-0.0414477	-1.00078	-1.51073	-0.330354	-3.72743	-0.740092	-1.23239	-2.57035	-3.42797
UBE2A	0.293392	0.193978	0.425828	0.238036	-0.565261	-0.987348	-0.329165	0.248142	0.569942	-5.42881	-2.52954	0.158352
UBE2B	0.0941964	0.136228	0.350038	0.167639	0.244698	0.207765	0.0318268	-0.294173	0.160785	-0.211625	0.182298	-0.0994022
UBE2C	-2.96231	-0.280008	-3.09386	-1.89249	-1.27855	-1.49457	-1.46533	-1.82132	-2.21929	-6.08268	-0.987887	-1.01773
UBE2D1	0.640032	0.350502	0.77211	0.199565	0.369416	0.342226	0.443591	-0.200771	0.178163	0.287029	0.665434	-0.111938
UBE2D2	0.434654	0.15334	0.433429	0.30102	-0.0793104	0.248245	0.201116	-0.000534943	0.422572	-0.00251752	-0.0179327	0.0836929
UBE2D3	-3.72027	-1.05361	-4.78117	-0.646675	-0.931034	-0.445369	-0.565906	-0.33523	0.316405	-0.889956	-0.342077	-0.321909
UBE2D4	-0.190808	-0.338716	-0.0703102	0.308258	0.0465008	-0.00621657	-0.177895	-0.411337	-0.386192	-0.478704	-0.0700387	-0.0804692
UBE2E1	-0.00714894	-1.8013	0.693505	0.0454142	0.00407737	-0.197852	0.330009	-0.631354	0.802456	-0.64974	-0.094836	0.67045
UBE2E2	0.446503	0.3041	-0.0460629	0.271095	0.607637	0.390258	0.386199	0.341652	0.549566	0.650315	0.293649	0.417644
UBE2E3	-0.157011	0.00544712	-0.171561	0.184118	-0.355835	-0.289718	0.0516416	-0.118942	-0.526257	0.371263	-0.229565	0.86458
UBE2F	0.500523	0.547672	0.16387	0.440027	0.704739	0.0605464	0.315848	0.0777155	0.509952	0.719633	0.648783	1.33807
UBE2G1	-0.526451	-1.17331	-1.69792	-0.253098	-0.158857	0.793277	0.6333	-0.224481	-0.894499	-2.36795	-0.462406	-0.217756
UBE2G2	-1.84931	-0.372136	-0.849999	-0.171949	-1.4176	-0.1625	-0.405806	-3.28805	-1.67438	-1.66406	-0.392616	-2.12534
UBE2H	0.643647	0.0152587	-0.144669	0.0215528	-0.689149	-0.428668	-1.91183	-2.18699	-0.819858	-3.84555	-3.123	-1.32731
UBE2I	-5.30805	-2.63999	-4.65634	-3.84578	-2.99331	-2.37165	-8.0014	-6.02113	-6.46328	-6.2744	-5.67332	-3.49242
UBE2J1	-0.263927	-0.655487	-0.423882	-0.089534	-0.255131	-0.0643283	-0.152026	-0.719158	0.0662032	-0.163555	-0.104874	-1.70124
UBE2J2	-1.19614	-0.916364	-6.19398	-0.64104	-0.257587	-0.842805	-0.468582	-0.717132	-1.67285	-1.5303	-0.227119	-0.274696
UBE2K	0.0404765	0.852299	-0.928558	-0.131414	-0.891811	-6.34704	-0.521699	-1.22503	-0.921785	-1.61042	-1.91521	-1.61142
UBE2L3	-3.73412	-2.57454	-6.2829	-2.59877	-0.80489	-3.39979	-2.75805	-1.62575	-3.14012	-5.06888	-3.77274	-1.94857
UBE2L6	-0.205473	-0.235906	-1.03148	-0.437527	-0.378106	0.392347	-0.116474	-0.674249	0.108617	-1.55327	-0.175983	-0.33614
UBE2M	-4.22279	-2.2856	-5.36175	-2.55018	-2.59987	-3.79328	-6.608	-2.88989	-5.76858	-4.27582	-1.66205	-2.5104
UBE2N	-3.69319	-3.10782	-2.31384	-1.71342	-3.21764	-2.29885	-4.22218	-4.88688	-6.20044	-3.87171	-3.02476	-1.0424
UBE2NL	-0.716148	-0.594055	-0.157926	-0.361082	0.347214	0.116329	-0.516714	-1.72092	-2.24155	-0.20085	0.316334	0.0210332
UBE2O	-0.0480977	-0.483993	-0.706735	-0.295815	-0.360792	-0.257675	-0.455111	0.255849	-0.102829	-2.89374	0.135403	-0.520848
UBE2Q1	-0.920112	-1.22399	-6.528	-1.05439	-0.24949	0.185138	-0.43289	-0.0446627	-0.170852	-2.66273	0.177611	-0.598959
UBE2Q2	-0.25939	-0.0631793	-0.215919	0.105108	-0.0233811	0.293504	0.046125	0.170012	0.212641	-0.681091	0.151899	-0.0543918
UBE2QL1	0.166483	-0.475316	0.42411	-0.348604	0.432302	0.0390367	-0.490973	-0.0788515	-1.7012	-1.5039	-0.485201	-0.0174308
UBE2R2	-0.168578	-3.2401	-0.146381	-0.313337	-0.170545	-1.94112	-0.414972	-0.285428	0.208663	-1.64118	0.108417	-1.1143
UBE2S	-0.597423	-0.279016	-0.385985	-0.508417	-0.492835	-0.2212	-0.302035	0.0683247	0.214088	-2.20692	-0.0338897	0.656782
UBE2T	-3.25459	-3.09997	-5.34631	-3.37492	-1.08418	-2.89501	-0.497009	-0.127764	-0.141667	-1.33636	0.0966246	-0.138572
UBE2U	0.0297228	-0.122727	0.10305	0.149768	-0.216399	-0.079043	-0.0281069	0.0799522	0.53981	0.361974	0.0530718	0.173483
UBE2V1	-0.225704	-1.22559	-0.311443	0.157383	-0.170466	-0.209184	-0.172864	-0.861648	-0.270716	-3.50403	0.165658	0.0544349
UBE2V2	-1.56543	-1.28895	-0.166049	0.238191	0.398669	-0.494334	0.0178736	-0.918762	-0.821112	-2.45046	0.256952	0.238399
UBE2W	-1.32964	-1.69323	-1.00393	-0.0321684	0.10324	0.0407387	0.00134007	-0.268525	-0.606851	-1.66014	0.104975	-0.045991
UBE2Z	0.0580761	-0.149663	-0.0891774	0.112315	-0.129625	0.160562	-0.445543	-0.880638	-0.689374	-0.819122	-0.477516	-1.15338
UBE3A	-1.19716	0.211811	-0.34998	0.0499925	0.780421	-0.699157	0.56967	0.708786	-0.391748	-0.00304783	0.0743121	-0.00714936
UBE3B	-0.329192	-0.831643	-0.64826	-0.143615	0.340262	-0.340433	0.0691301	-0.524341	-0.801748	-1.79539	-0.123603	-0.631542
UBE3C	-0.0796644	-0.175781	-0.649773	-0.0196435	0.138507	-0.415712	-0.0791709	0.304565	0.284864	-3.29595	0.539507	-0.0728687
UBE4A	0.290077	0.345477	0.0440967	0.15169	-0.0910441	-0.227014	0.475158	0.433353	-0.0771899	0.232444	0.0257651	0.0677693
UBE4B	-1.30391	-0.851608	-0.336395	0.0704754	-0.182513	-3.21272	-0.854558	-0.00920538	-0.0617129	-0.504993	-2.63606	-0.728933
UBOX5	0.205043	0.293524	0.321398	0.118428	0.018073	0.376828	0.205103	0.734095	0.248311	-0.249573	0.0563596	-0.245108
UBR1	-0.029056	0.556056	-0.328906	-0.149561	0.464432	0.170736	-0.158777	-0.569514	0.675918	0.374666	0.387877	-0.235158
UBR2	0.992037	0.559114	1.39454	0.209786	0.356664	0.227205	-0.00958597	-0.919576	-0.301272	0.480589	-0.105154	0.127841
UBR3	0.0331062	-0.35374	0.167654	0.405021	-0.206003	-0.575047	0.140504	-0.147712	0.0235816	-1.15559	0.0996956	0.202413
UBR5	-2.17734	-1.48068	-2.83436	-2.63438	-1.84288	-0.375897	-3.49167	-2.21176	-4.25	-1.03104	-2.60436	-1.11195
UHRF1	-3.54044	-2.71812	-3.31018	-2.26993	-2.18566	-2.2585	-4.47833	-5.32426	-4.45801	-4.46874	-3.66073	-3.14819
UHRF2	0.561436	0.20206	-0.257371	0.222398	-0.592203	0.247643	-0.0463715	0.139771	0.348433	-0.691518	0.196478	0.198503
UNK	-0.429264	-0.950531	-0.492411	-0.0835259	0.109926	-1.22913	-0.104764	-0.323648	0.00715568	-0.942708	-0.288055	-0.187101
UNKL	0.0721276	0.538567	0.200816	0.360781	0.442514	0.0860338	-0.226251	-0.272282	0.0750018	-0.00210485	-0.283004	0.361506
VPS11	-0.315019	-0.265936	-0.409767	-0.899197	-0.733444	-0.0448941	-0.0874617	-1.32264	-1.4583	-0.346274	-0.278341	-0.216729
VPS18	-1.93885	-1.27981	-2.37034	-2.76018	-3.34217	-3.22717	-1.53336	-3.03688	-4.85509	-5.87249	-3.16161	-1.66987
VPS41	-0.876651	-0.0727354	-0.825768	-0.266695	-0.748812	-0.580503	0.0920486	-0.944613	-1.45122	-2.4722	-0.628087	-0.445676
VPS8	-1.69641	-0.403058	-0.567648	-1.34263	0.360245	-0.18964	0.151534	-0.381783	0.263676	0.778022	-0.196803	0.190071
WDSUB1	0.0850042	0.26132	0.0909889	0.253736	0.144749	-0.395959	-0.00901293	0.199968	0.153407	-0.0920069	0.0561134	0.100011
WDTC1	0.105495	-0.541985	0.131035	-0.241919	-0.00727129	-0.24115	-0.204764	-0.45358	0.0367957	-0.67736	-0.18217	-0.108426
WSB1	-0.891515	-0.919491	-2.8688	-0.130276	-0.408202	-0.703067	-0.656217	-0.0174584	-1.0064	-0.253031	0.573173	0.0461556
WSB2	-0.452464	0.0962889	0.204493	0.129695	-0.0473859	-0.498214	-0.45897	-0.937215	0.00328541	-1.59807	-0.125259	0.0616562
WWP1	-0.52986	0.417112	0.0669065	0.126819	0.448393	0.41251	0.540426	0.273318	0.529661	0.423864	0.302106	0.132786
WWP2	-0.147699	-0.396055	-0.580582	-0.0835114	-0.0867381	0.134121	0.265776	-0.111965	0.672476	-0.579693	-0.232768	-0.0992486
XIAP	-0.019752	-0.827145	0.362443	0.0905195	0.145927	0.161801	-0.570809	0.0146632	0.276845	-0.9037	0.343672	-0.0238337
ZFP36	-0.454818	-0.334556	-0.659328	-0.255208	0.504971	-0.298993	-0.12009	0.232011	-0.606395	-1.13551	0.334556	-0.250756
ZFP36L1	-0.358567	-0.407262	-0.865878	-0.369542	-0.270462	0.644087	-0.033844	-0.0193727	-0.7585	-1.52377	-0.827572	-1.51456
ZFPL1	0.100242	0.355912	0.212763	-0.154432	0.322509	-0.381506	-0.225978	-0.357396	0.152607	-1.88058	-0.108787	-0.786122
ZMIZ1	-1.65965	-0.377605	-2.40774	-1.52533	-1.92902	-0.281652	-0.840783	-0.178148	-1.00576	-1.34531	0.0689432	-0.636915
ZMIZ2	-0.179324	-0.521171	0.205995	0.255278	0.300749	-0.217626	0.0545636	0.244663	0.417881	-1.61889	-0.0340039	0.31008
ZNF598	0.43246	-0.609774	0.433838	-0.552749	-0.00118597	-0.479588	-0.622645	-0.770769	-0.594654	-1.88292	-0.689546	-1.08521
ZNF645	0.108495	0.0861499	0.616887	0.221959	0.286706	0.440591	0.491058	0.119616	0.733647	-0.182588	0.506618	0.29327
ZNRF1	0.1278	0.354996	-0.0499552	0.276378	0.00112989	0.112263	-0.0941998	0.40067	-0.258078	0.263553	0.281999	-0.0402459
ZNRF2	0.237976	0.849344	0.667739	0.489052	0.334368	0.310388	0.569065	0.266147	0.706714	-0.0214177	0.833801	0.220905
ZNRF3	0.386626	0.520479	-0.0509632	0.320246	0.0674389	-0.117808	-0.133165	0.291513	-0.0858846	-0.157899	0.490311	0.360633
ZNRF4	-0.290308	-0.695884	-0.163183	0.0269628	0.321336	0.452894	0.0458561	0.467302	0.422429	-0.399783	0.0563997	0.018082
ZSWIM2	0.397712	-0.0278792	0.449824	0.149069	-0.0197312	-0.0644596	0.457936	-0.02701	-0.0112334	0.78337	0.0415628	-0.294421
