# Supplementary material for: Transcriptional Silencing of ALDH2 Confers a Dependency on Fanconi Anemia Proteins in Acute Myeloid Leukemia
Source: Oxford University Press journal article supplement (doi:10.1158/2159-8290.cd-20-1542), 2021-04-23
Supplement: 21598290cd201542-sup-254337_2_supp_7041616_qr9hxx.xlsx [file 21598290cd201542-sup-254337_2_supp_7041616_qr9hxx.xlsx]

## Sheet: Sheet1
Oligo sequences used in this study
sgUBE2T#1	GAGTGAGAAATCGGATCTG
sgUBE2T#2	TCAGCCATGAGCGGGTCATC
sgFANCL#1	CACGGTTTTCGACCGGTTCT
sgFANCL#2	CAGGCAACACTATCCTAAGG
sgFANCD2#1	ATAGGAAGGGTGTCTCCTC
sgFANCD2#2	CATCCTCAATGTAAGACTCC
sgNEG	GAGTCGCTTCTCGATTATGGG
sgCDK1	ACACAATCCCCTGTAGGATT
shFANCD2#1	TGCTGTTGACAGTGAGCGCACGGGAGAGAGTCAGAATCAATAGTGAAGCCACAGATGTATTGATTCTGACTCTCTCCCGTTTGCCTACTGCCTCGGA
shFANCD2#2	TGCTGTTGACAGTGAGCGACGGGAAGATGTTCTGAGCTTATAGTGAAGCCACAGATGTATAAGCTCAGAACATCTTCCCGGTGCCTACTGCCTCGGA
shRen	TGCTGTTGACAGTGAGCGCAGGAATTATAATGCTTATCTATAGTGAAGCCACAGATGTATAGATAAGCATTATAATTCCTATGCCTACTGCCTCGGA
sgTP53#1	CCATTGTTCAATATCGTCCG
sgTP53#2	TCCATTGCTTGGGACGGCAA
sgCDKN1A#1	TGTCCACTGGGCCGAAGAGG
sgCDKN1A#2	CCATTAGCGCATCACAGTCG
sgCDKN1A#3	CCGCGACTGTGATGCGCTAA
sgRosa for mouse cell line (RN2)	GAAGATGGGCGGGAGTCTTC
sgAldh2#1 for mouse cell line (RN2)	TGGTGGCGGCGGCGGACAAC
sgAldh2#2 for mouse cell line (RN2)	AGTGGCACGACGCCGTCAGC
sgAldh2#3 for mouse cell line (RN2)	AGATGCATCCATGCGGCGCC
sgAldh2#4 for mouse cell line (RN2)	CCTTATGTCATCTCGTACC
sgAldh2#5 for mouse cell line (RN2)	TATACCCGCCATGAGCCTGT
ALDH2 5' primer for RT-qPCR	ATGTCTCCGGTATTATGCC
ALDH2 3' primer for RT-qPCR	ATTCCACGGAATGATCTGC
UBE2T 5' primer for RT-qPCR	CCACCAAAAGGTGCTTGGAG
UBE2T 3' primer for RT-qPCR	GCATGCTTCTCTGTCCACTG
FANCL 5' primer for RT-qPCR	GTACAACAGAGAATGCAGCA
FANCL 3' primer for RT-qPCR	CGCATACACAAGTTTATCC
FANCD2 5' primer for RT-qPCR	AAGATGCCTCCAAAACCAG
FANCD2 3' primer for RT-qPCR	TTGATCCACAGCTAGTTGA
Beta2-microglobulin 5' primer for RT-qPCR	TCGCGCTACTCTCTCTTTCT
Beta2-microglobulin 3' primer for RT-qPCR	TCTCTGCTGGATGACGTGAG
5' primer to amplify sgUBE2T cutting site	GCGGGATCCGCCACCAATACTGTTATTTCAAACTG
3' primer to amplify sgUBE2T cutting site	GGTGGCGCCGCTGCCGTTGCGATGTTGAGGGATGG
5' primer to amplify sgFANCL cutting site	GCGGGATCCGCCACCTGCGCTTCACCTTCATTTCC
3' primer to amplify sgFANCL cutting site	GGTGGCGCCGCTGCCGTCTCCCAAGAGCCGTTACG
5' primer to amplify sgFANCD2 cutting site	GCGGGATCCGCCACCGTCTCTGAAATTAGGTTG
3' primer to amplify sgFANCD2 cutting site	GGTGGCGCCGCTGCCCCTCAATGTAAGACTCCAGG
sgRNA for ALDH2 promoter Nanopore sequencing
ALDH2_UP_1	CCTGCTCGTCTCATAACTCG
ALDH2_UP_2	GCTCGTCTCATAACTCGTGG
ALDH2_UP_3	ATTCTGCCCACCACTGTCGA
ALDH2_DOWN_1	AGGCTTATAGAGTTGCGGGT
ALDH2_DOWN_2	GCCTCATCGAGTACTTCTGG
ALDH2_DOWN_3	CATGCGTTTTTCCAAACATG
